# Supplementary material for: Synthesis of a new fluorophore: wavelength-tunable bisbenzo[ f ]isoindolylidenes
Source: Royal Society of Chemistry journal article supplement (doi:10.1039/d3sc04445a), 2023-01-01
Supplement: d3sc04445a1.pdf [file d3sc04445a1.pdf]

## Supplementary information

### Synthesis of New Fluorophore: Wavelength-Tunable Bisbenzo[*f*]isoindolyidenes

Changqing Ye,<sup>1,+</sup> Rui Huang,<sup>1,2,+</sup> Mong-Feng Chiou,<sup>1</sup> Bo Wang,<sup>2</sup> Daliang Li<sup>2,\*</sup> and Hongli Bao<sup>1,3\*</sup>

<sup>1</sup> State Key Laboratory of Structural Chemistry, Key Laboratory of Coal to Ethylene Glycol and Its Related Technology, Center for Excellence in Molecular Synthesis, Fujian Science & Technology Innovation Laboratory for Optoelectronic Information of China, Fujian Institute of Research on the Structure of Matter, Chinese Academy of Sciences, 155 Yangqiao Road West, Fuzhou, Fujian 350002, P. R. of China.

<sup>2</sup> Fujian Key Laboratory of Innate Immune Biology, Biomedical Research Center of South China, Key Laboratory of OptoElectronic Science and Technology for Medicine of Ministry of Education, College of Life Sciences, Fujian Normal University, Fuzhou 350007, P.R. China

<sup>3</sup> University of Chinese Academy of Sciences, Beijing 100049, P. R. of China

\*Correspondence to: hlbao@fjirsm.ac.cn; daliangli@fjnu.edu.cn

+ equal contributions

# Table of contents

|                                                                              |    |
|------------------------------------------------------------------------------|----|
| Table of contents.....                                                       | 2  |
| Materials and methods .....                                                  | 4  |
| Reaction conditions optimizations .....                                      | 5  |
| General procedure for Table S1:.....                                         | 5  |
| Synthesis of dipropargyl benzene sulfonamide .....                           | 6  |
| Synthesis of propargyl alcohol.....                                          | 6  |
| Synthesis of <b>1s, 2s, 3s, 5s, 8s, 9s, 11s, 12s, 13s, 16s, 18s</b> .....    | 6  |
| Synthesis of <b>4s, 6s, 7s, 10s, 14s, 15s, 17s</b> .....                     | 6  |
| Characterization data for dipropargyl benzene sulfonamide .....              | 8  |
| Synthesis of the new fluorophore .....                                       | 15 |
| Characterization data for the new fluorophore .....                          | 16 |
| Synthetic applications .....                                                 | 26 |
| C-B Bond Coupling .....                                                      | 26 |
| SN <sub>2</sub> Substitution Reaction.....                                   | 27 |
| Sonogashira Coupling.....                                                    | 31 |
| Click Reaction.....                                                          | 33 |
| Mechanism Study.....                                                         | 37 |
| Cross-over Experiment .....                                                  | 37 |
| Deuteration Experiments .....                                                | 38 |
| Possible Intermediates .....                                                 | 40 |
| Substituent Effect.....                                                      | 41 |
| Experiments with TEMPO.....                                                  | 41 |
| DFT Calculations .....                                                       | 43 |
| Computation of electronic properties of compound <b>1, 6 and 8</b> .....     | 43 |
| Computation of reaction mechanism .....                                      | 45 |
| Measurement and characterization of photophysical properties.....            | 62 |
| Materials and Methods.....                                                   | 62 |
| UV-visible absorption spectrum and fluorescence spectra of <b>1-18</b> ..... | 63 |
| Spectrum of molar absorption coefficient of compound <b>1, 6, 8</b> .....    | 72 |
| Photostability experiments.....                                              | 74 |
| Cell experiments .....                                                       | 75 |
| Materials and Methods.....                                                   | 75 |
| Cell Culture and Imaging by Laser Scanning Microscopy .....                  | 76 |
| Living cell imaging.....                                                     | 77 |
| Single crystal data .....                                                    | 78 |

|                   |     |
|-------------------|-----|
| NMR spectra ..... | 83  |
| Reference .....   | 135 |

## Materials and methods

Commercially obtained reagents were used as received. Solvents were dried by Innovative Technology Solvent Purification System. Liquids and solutions were transferred via syringe. All reactions were monitored by thin-layer chromatography. GC-MS data were recorded on Thermo ISQ QD.  $^1\text{H}$  and  $^{13}\text{C}$  NMR spectra were recorded on Bruker-BioSpin AVANCE III HD and JEOL ECZ600S. Data for  $^1\text{H}$  NMR spectra are reported relative to TMS as an internal standard (0.00 ppm) and are reported as follows: chemical shift (ppm), multiplicity, coupling constant (Hz), and integration. Data for  $^{13}\text{C}$  NMR spectra are reported relative to chloroform as an internal standard (77.16 ppm) and are reported in terms of chemical shift (ppm). HRMS data were recorded on Thermo Fisher Scientific LTQ FTICR-MS and Thermo Scientific Q Exactive HF Orbitrap-FTMS. UV-vis absorption spectra of solution were recorded on Shimadzu UV-2450 UV-Vis spectrophotometer. Photoluminescence spectra of solutions sample were measured on the Edinburgh Instruments FLS5 fluorescence spectrofluorometer. The absolute fluorescence quantum yield was measured on the Edinburgh Instruments FLS1000 three-monochromator spectrophotometer.

## Reaction conditions optimizations

**General procedure for Table S1:** In a flame-dried Schlenk tube, dipropargyl sulfonamide **1** (0.2 mmol, 1 equiv) and Base (0.4 mmol, 2 equiv) were dissolved in solvent (1 mL) under open air conditions. The reaction mixture was stirred at 80 °C for 24 h. Upon completion of the reaction as monitored by TLC, the reaction was quenched with MeOH (5 mL). The suspension was filtered and the filter residue was washed with 5 mL water and 5 mL MeOH to get the crude product. The crude material was purified by silica gel flash chromatography using petroleum ether and dichloromethane to yield the corresponding product.

**Table S1.** Optimization of the reaction conditions<sup>a</sup>

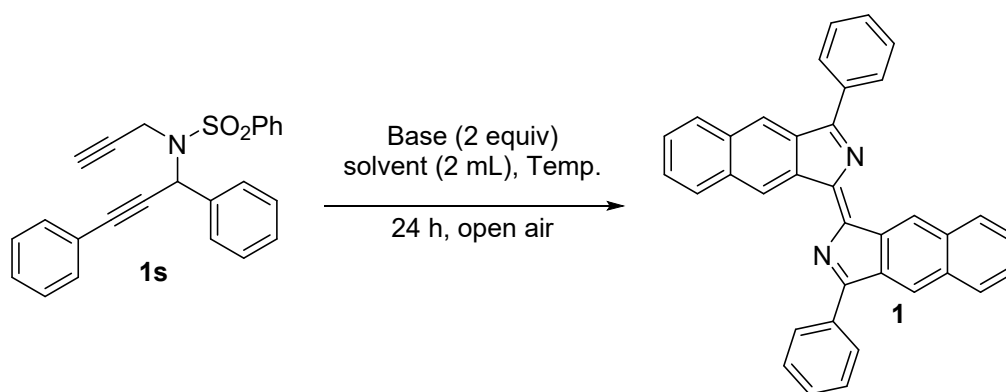

| Entry           | Solvent           | Base                            | Temperature | Yield |
|-----------------|-------------------|---------------------------------|-------------|-------|
| 1               | <i>i</i> -PrOH    | Cs <sub>2</sub> CO <sub>3</sub> | 80 °C       | 30%   |
| 2               | DMSO              | Cs <sub>2</sub> CO <sub>3</sub> | 80 °C       | trace |
| 3               | Xylene            | Cs <sub>2</sub> CO <sub>3</sub> | 80 °C       | 30%   |
| 4               | <i>n</i> -Heptane | Cs <sub>2</sub> CO <sub>3</sub> | 80 °C       | 19%   |
| 5               | 1,4-Dioxane       | Cs <sub>2</sub> CO <sub>3</sub> | 80 °C       | 26%   |
| 6               | DMAc              | Cs <sub>2</sub> CO <sub>3</sub> | 80 °C       | trace |
| 7               | Acetophenone      | Cs <sub>2</sub> CO <sub>3</sub> | 80 °C       | trace |
| 8               | <i>t</i> -BuOH    | Cs <sub>2</sub> CO <sub>3</sub> | 80 °C       | 28%   |
| 9               | <i>i</i> -PrOH    | K <sub>2</sub> CO <sub>3</sub>  | 80 °C       | 48%   |
| 10              | <i>i</i> -PrOH    | KOH                             | 80 °C       | trace |
| 11              | <i>i</i> -PrOH    | DMAP                            | 80 °C       | 28%   |
| 12              | <i>i</i> -PrOH    | Na <sub>2</sub> CO <sub>3</sub> | 80 °C       | 9%    |
| 13              | <i>i</i> -PrOH    | Et <sub>3</sub> N               | 80 °C       | 12%   |
| 14              | <i>i</i> -PrOH    | K <sub>2</sub> CO <sub>3</sub>  | rt          | trace |
| 15              | <i>i</i> -PrOH    | K <sub>2</sub> CO <sub>3</sub>  | 60 °C       | 35%   |
| 16 <sup>b</sup> | <i>i</i> -PrOH    | K <sub>2</sub> CO <sub>3</sub>  | 80 °C       | 40%   |
| 17 <sup>c</sup> | <i>i</i> -PrOH    | K <sub>2</sub> CO <sub>3</sub>  | 80 °C       | trace |

<sup>a</sup> Reaction conditions: **1s** (0.2 mmol, 1 equiv), base (0.4 mmol, 2 equiv), solvent (1 mL). <sup>b</sup>Under 1 atm O<sub>2</sub> atmosphere. <sup>c</sup> Under N<sub>2</sub> atmosphere.

## Synthesis of dipropargyl benzene sulfonamide

All alkynes and aldehyde were purchased from Adamas-beta, Energy Chemical and Bidepharmatech.

### Synthesis of propargyl alcohol.

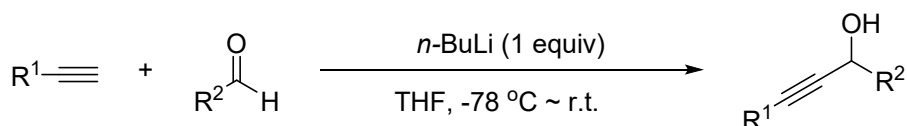

A 50 mL round bottomed flask was charged with terminal alkyne (5 mmol, 1 equiv) and 10 mL of THF. The solution was cooled to  $-78\text{ }^\circ\text{C}$  and *n*-BuLi (2.5 M in THF, 2 mL, 5 mmol, 1 equiv) was added dropwise. The resulting solution was stirred for 20 minutes at room temperature and then cooled to  $-78\text{ }^\circ\text{C}$  again. Aldehyde (5 mmol, 1 equiv) in THF (5 mL) was added dropwise. The reaction mixture was then allowed to warm to room temperature and was monitored by TLC for completion. On completion the reaction was quenched with saturated aqueous  $\text{NH}_4\text{Cl}$  (4 mL). The aqueous layer was extracted with ethyl acetate and the combined organic layers were washed with brine (30 mL), dried over  $\text{MgSO}_4$  and filtered. Then the solution was concentrated under reduced pressure to afford the crude propargyl alcohol.

### Synthesis of 1s, 2s, 3s, 5s, 8s, 9s, 11s, 12s, 13s, 16s, 18s.

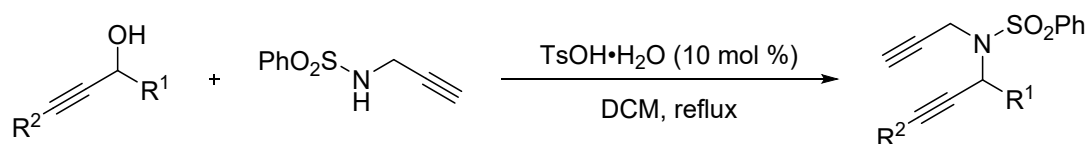

The solution of the resulting crude propargyl alcohol and *N*-propargylbenzenesulfonamide (1.2 equiv) in DCM was added into a round bottom flask under nitrogen atmosphere and then  $\text{TsOH}\cdot\text{H}_2\text{O}$  (10 mol%) was added at room temperature. The reaction mixture was heated to reflux overnight and was monitored by TLC for completion. On completion of the reaction, saturated aqueous  $\text{NaHCO}_3$  was added to quench the reaction. The aqueous layer was extracted with ethyl acetate and the combined organic layers were washed with brine, dried over  $\text{MgSO}_4$  and filtered. Then the solution was concentrated under reduced pressure. The crude material was purified by flash chromatography on silica gel using petroleum ether and ethyl acetate to yield the corresponding dipropargyl benzenesulfonamide.

## Synthesis of 4s, 6s, 7s, 10s, 14s, 15s, 17s.

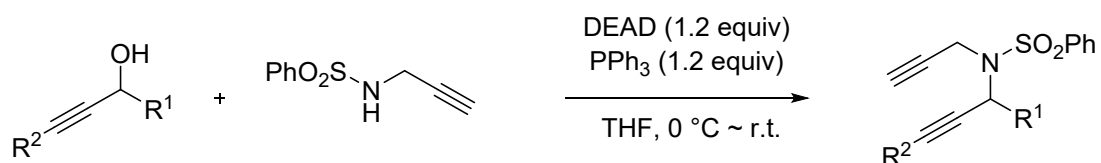

A solution of the resulting crude propargyl alcohol, *N*-propargylbenzenesulfonamide (1.2 equiv), and PPh<sub>3</sub> (1.2 equiv) in THF was taken in a round bottom flask under nitrogen atmosphere and then DEAD (1.2 equiv) was added dropwise at 0 °C. The reaction mixture was stirred at room temperature and was monitored by TLC for completion. On completion the reaction was quenched with saturated aqueous NaHCO<sub>3</sub>. The aqueous layer was extracted with DCM and the combined organic layers were washed with brine, dried over MgSO<sub>4</sub> and filtered. Then the solution was concentrated under reduced pressure. The crude material was purified by flash chromatography on silica gel using petroleum ether and ethyl acetate to yield the corresponding dipropargyl benzene sulfonamide.

# Characterization data for dipropargyl benzene sulfonamide

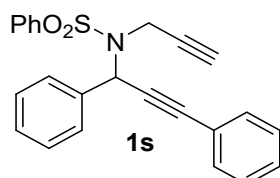

$^1\text{H}$  NMR (600 MHz,  $\text{CDCl}_3$ )  $\delta$  8.06 – 8.03 (m, 2H), 7.70 – 7.68 (m, 2H), 7.58 – 7.54 (m, 1H), 7.51 – 7.48 (m, 2H), 7.41 – 7.37 (m, 2H), 7.37 – 7.33 (m, 1H), 7.33 – 7.29 (m, 1H), 7.28 – 7.25 (m, 2H), 7.20 – 7.17 (m, 2H), 6.32 (s, 1H), 4.13 (dd,  $J = 18.4, 2.6$  Hz, 1H), 3.75 (dd,  $J = 18.4, 2.5$  Hz, 1H), 1.89 (t,  $J = 2.5$  Hz, 1H).  $^{13}\text{C}$  NMR (150 MHz,  $\text{CDCl}_3$ )  $\delta$  139.33, 135.66, 132.97, 131.59, 128.82, 128.75, 128.69, 128.37, 128.31, 128.29, 122.18, 88.78, 83.26, 78.21, 72.79, 53.80, 33.84. HRMS  $m/z$  (ESI) calcd for  $[\text{C}_{24}\text{H}_{19}\text{NO}_2\text{SNa}]$  ( $[\text{M}+\text{Na}]^+$ ): 408.1029, found: 408.1030.

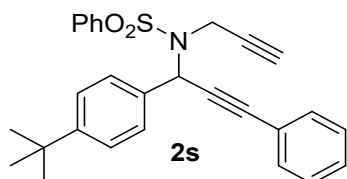

$^1\text{H}$  NMR (600 MHz,  $\text{CDCl}_3$ )  $\delta$  8.08 – 8.03 (m, 2H), 7.59 (d,  $J = 8.1$  Hz, 2H), 7.55 (t,  $J = 7.4$  Hz, 1H), 7.49 (t,  $J = 8.0$  Hz, 2H), 7.40 (d,  $J = 8.5$  Hz, 2H), 7.32 – 7.28 (m, 1H), 7.27 – 7.25 (m, 2H), 7.20 – 7.16 (m, 2H), 6.28 (s, 1H), 4.15 (dd,  $J = 18.7, 2.8$  Hz, 1H), 3.73 (dd,  $J = 18.5, 2.5$  Hz, 1H), 1.89 (t,  $J = 2.5$  Hz, 1H), 1.32 (s, 9H).  $^{13}\text{C}$  NMR (150 MHz,  $\text{CDCl}_3$ )  $\delta$  151.91, 139.47, 132.92, 132.61, 131.57, 128.78, 128.67, 128.32, 128.30, 128.08, 125.65, 122.33, 88.46, 83.66, 78.32, 72.73, 53.48, 34.72, 33.76, 31.43. HRMS  $m/z$  (ESI) calcd for  $[\text{C}_{28}\text{H}_{27}\text{NO}_2\text{SNa}]$  ( $[\text{M}+\text{Na}]^+$ ): 464.1655, found: 464.1656.

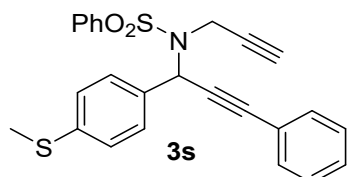

$^1\text{H}$  NMR (600 MHz,  $\text{CDCl}_3$ )  $\delta$  8.04 (d,  $J = 7.4$  Hz, 2H), 7.59 (d,  $J = 8.2$  Hz, 2H), 7.56 (t,  $J = 7.4$  Hz, 1H), 7.49 (t,  $J = 7.7$  Hz, 2H), 7.31 (t,  $J = 6.8$  Hz, 1H), 7.27 – 7.24 (m, 4H), 7.17 (d,  $J = 7.0$  Hz, 2H), 6.26 (s, 1H), 4.12 (dd,  $J = 18.4, 2.5$  Hz, 1H), 3.74 (dd,  $J = 18.4, 2.5$  Hz, 1H), 2.49 (s, 3H), 1.91 (t,  $J = 2.5$  Hz, 1H).  $^{13}\text{C}$  NMR (150 MHz,  $\text{CDCl}_3$ )  $\delta$  139.48, 139.24, 133.01, 132.29, 131.59, 128.84, 128.83, 128.33, 128.28, 126.30,



122.10, 88.80, 83.13, 78.17, 72.92, 53.43, 33.78, 15.66. HRMS  $m/z$  (ESI) calcd for  $[C_{25}H_{21}NO_2S_2Na]$  ( $[M+Na]^+$ ): 454.0906, found: 454.0907.

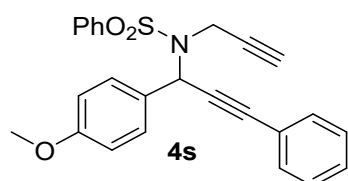

$^1H$  NMR (600 MHz,  $CDCl_3$ )  $\delta$  8.10 – 8.02 (m, 2H), 7.63 – 7.59 (m, 2H), 7.58 – 7.54 (m, 1H), 7.52 – 7.48 (m, 2H), 7.33 – 7.30 (m, 1H), 7.29 – 7.25 (m, 2H), 7.21 – 7.17 (m, 2H), 6.95 – 6.89 (m, 2H) 6.28 (s, 1H), 4.14 (dd,  $J = 18.4, 2.6$  Hz, 1H), 3.82 (s, 3H), 3.76 (dd,  $J = 18.4, 2.5$  Hz, 1H), 1.93 (t,  $J = 2.5$  Hz, 1H).  $^{13}C$  NMR (150 MHz,  $CDCl_3$ )  $\delta$  159.98, 139.39, 132.94, 131.59, 129.72, 128.81, 128.73, 128.27, 127.63, 122.24, 114.00, 88.56, 83.62, 78.36, 72.74, 55.45, 53.32, 33.61. HRMS  $m/z$  (ESI) calcd for  $[C_{25}H_{21}NO_3SNa]$  ( $[M+Na]^+$ ): 438.1134, found: 438.1135.

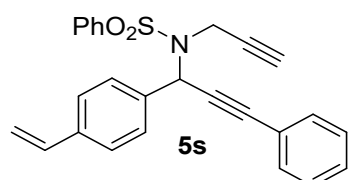

$^1H$  NMR (600 MHz,  $CDCl_3$ )  $\delta$  8.08 – 8.03 (m, 2H), 7.66 (d,  $J = 8.1$  Hz, 2H), 7.59 – 7.54 (m, 1H), 7.52 – 7.48 (m, 2H), 7.43 (d,  $J = 8.3$  Hz, 2H), 7.34 – 7.30 (m, 1H), 7.29 – 7.26 (m, 2H), 7.23 – 7.18 (m, 2H), 6.73 (dd,  $J = 17.6, 10.9$  Hz, 1H), 6.31 (s, 1H), 5.79 (dd,  $J = 17.6, 0.8$  Hz, 1H), 5.29 (d,  $J = 11.6$  Hz, 1H), 4.15 (dd,  $J = 18.4, 2.6$  Hz, 1H), 3.78 (dd,  $J = 18.4, 2.6$  Hz, 1H), 1.92 (t,  $J = 2.5$  Hz, 1H).  $^{13}C$  NMR (150 MHz,  $CDCl_3$ )  $\delta$  139.34, 138.08, 136.31, 135.14, 133.00, 131.61, 128.86, 128.80, 128.59, 128.35, 128.29, 126.51, 122.17, 114.80, 88.84, 83.26, 78.23, 72.96, 53.64, 33.88. HRMS  $m/z$  (ESI) calcd for  $[C_{26}H_{21}NO_2SNa]$  ( $[M+Na]^+$ ): 434.1185, found: 434.1184.

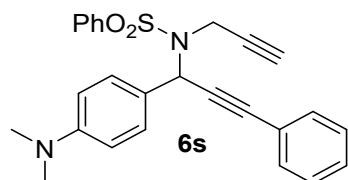

$^1H$  NMR (600 MHz,  $CDCl_3$ )  $\delta$  8.07 (d,  $J = 7.4$  Hz, 2H), 7.59 – 7.45 (m, 5H), 7.34 – 7.23 (m, 3H), 7.17 (d,  $J = 7.0$  Hz, 2H), 6.72 (d,  $J = 8.8$  Hz, 2H), 6.25 (s, 1H), 4.15 (dd,  $J = 18.5, 2.5$  Hz, 1H), 3.73 (dd,  $J = 18.5, 2.4$  Hz, 1H), 2.96 (s, 6H), 1.94 (t,  $J = 2.4$  Hz, 1H).  $^{13}C$  NMR (150 MHz,  $CDCl_3$ )  $\delta$  150.77, 139.53, 132.91, 131.58, 129.41, 128.78, 128.61, 128.38, 128.33, 122.64, 122.50, 88.16, 84.20, 78.58, 72.67, 53.37, 40.63, 33.38. HRMS  $m/z$  (ESI) calcd for  $[C_{26}H_{24}N_2O_2SNa]$  ( $[M+Na]^+$ ): 451.1451, found: 451.1450.

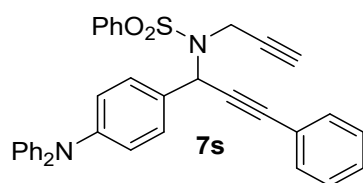

$^1\text{H}$  NMR (600 MHz,  $\text{CDCl}_3$ )  $\delta$  8.10 – 8.04 (m, 2H), 7.59 – 7.54 (m, 3H), 7.50 (t,  $J$  = 7.7 Hz, 2H), 7.32 – 7.30 (m, 1H), 7.28 – 7.25 (m, 6H), 7.19 (d,  $J$  = 7.9 Hz, 2H), 7.12 – 7.08 (m, 6H), 7.05 (t,  $J$  = 7.7 Hz, 2H), 6.29 (s, 1H), 4.18 (d,  $J$  = 18.4 Hz, 1H), 3.87 (d,  $J$  = 18.4 Hz, 1H), 1.97 (s, 1H).  $^{13}\text{C}$  NMR (150 MHz,  $\text{CDCl}_3$ )  $\delta$  148.38, 147.58, 139.45, 132.97, 131.60, 129.45, 129.36, 129.02, 128.86, 128.76, 128.34, 128.28, 124.70, 123.34, 123.19, 122.22, 88.61, 83.58, 78.52, 72.73, 53.49, 33.77. HRMS  $m/z$  (ESI) calcd for  $[\text{C}_{36}\text{H}_{28}\text{N}_2\text{O}_2\text{SNa}]$  ( $[\text{M}+\text{Na}]^+$ ): 575.1764, found: 575.1760.

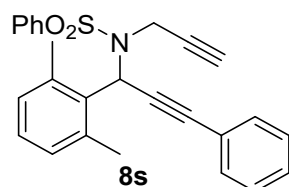

$^1\text{H}$  NMR (600 MHz,  $\text{CDCl}_3$ )  $\delta$  7.78 – 7.73 (m, 2H), 7.45 – 7.41 (m, 1H), 7.30 – 7.27 (m, 3H), 7.26 – 7.22 (m, 4H), 7.07 (t,  $J$  = 7.6 Hz, 1H), 6.93 (d,  $J$  = 7.5 Hz, 2H), 6.39 (s, 1H), 4.26 – 4.16 (m, 2H), 2.50 (s, 6H), 2.16 (t,  $J$  = 2.4 Hz, 1H).  $^{13}\text{C}$  NMR (150 MHz,  $\text{CDCl}_3$ )  $\delta$  139.99, 138.53, 132.52, 132.10, 131.52, 129.68, 128.61, 128.57, 128.32, 128.29, 128.21, 122.65, 87.67, 85.46, 79.20, 73.42, 50.02, 35.89, 21.05. HRMS  $m/z$  (ESI) calcd for  $[\text{C}_{26}\text{H}_{23}\text{NO}_2\text{SNa}]$  ( $[\text{M}+\text{Na}]^+$ ): 436.1342, found: 436.1342.

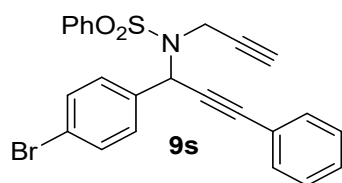

$^1\text{H}$  NMR (600 MHz,  $\text{CDCl}_3$ )  $\delta$  8.04 – 8.00 (m, 2H), 7.59 – 7.54 (m, 3H), 7.53 – 7.48 (m, 4H), 7.34 – 7.30 (m, 1H), 7.29 – 7.25 (m, 2H), 7.21 – 7.16 (m, 2H), 6.26 (s, 1H), 4.11 (dd,  $J$  = 18.4, 2.5 Hz, 1H), 3.80 (dd,  $J$  = 18.4, 2.5 Hz, 1H), 1.93 (t,  $J$  = 2.5 Hz, 1H).  $^{13}\text{C}$  NMR (150 MHz,  $\text{CDCl}_3$ )  $\delta$  139.05, 134.99, 133.16, 131.80, 131.65, 130.12, 129.01, 128.97, 128.41, 128.23, 122.95, 121.86, 89.27, 82.53, 78.01, 73.18, 53.44, 34.03. HRMS  $m/z$  (ESI) calcd for  $[\text{C}_{24}\text{H}_{18}\text{NO}_2\text{SBrNa}]$  ( $[\text{M}+\text{Na}]^+$ ): 486.0134, found: 486.0134.

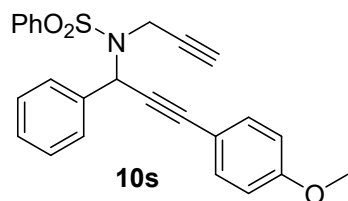

$^1\text{H}$  NMR (600 MHz,  $\text{CDCl}_3$ )  $\delta$  8.06 – 8.03 (m, 2H), 7.70 – 7.66 (m, 2H), 7.58 – 7.54 (m, 1H), 7.51 – 7.47 (m, 2H), 7.40 – 7.36 (m, 2H), 7.36 – 7.32 (m, 1H), 7.12 (d,  $J = 8.9$  Hz, 2H), 6.78 (d,  $J = 8.9$  Hz, 2H), 6.29 (s, 1H), 4.11 (dd,  $J = 18.4, 2.6$  Hz, 1H), 3.80 (s, 3H), 3.75 (dd,  $J = 18.4, 2.5$  Hz, 1H), 1.88 (t,  $J = 2.5$  Hz, 1H).  $^{13}\text{C}$  NMR (150 MHz,  $\text{CDCl}_3$ )  $\delta$  159.92, 139.36, 135.88, 133.06, 132.91, 128.79, 128.67, 128.63, 128.38, 128.30, 114.27, 113.91, 88.79, 81.80, 78.30, 72.66, 55.39, 53.94, 33.83. HRMS  $m/z$  (ESI) calcd for  $[\text{C}_{25}\text{H}_{21}\text{NO}_3\text{SNa}]$  ( $[\text{M}+\text{Na}]^+$ ): 438.1134, found: 438.1134.

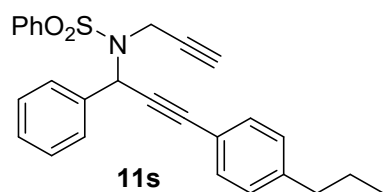

$^1\text{H}$  NMR (600 MHz,  $\text{CDCl}_3$ )  $\delta$  8.08 – 8.02 (m, 2H), 7.72 – 7.68 (m, 2H), 7.58 – 7.54 (m, 1H), 7.52 – 7.48 (m, 2H), 7.41 – 7.37 (m, 2H), 7.36 – 7.33 (m, 1H), 7.11 (d,  $J = 8.3$  Hz, 2H), 7.08 (d,  $J = 8.4$  Hz, 2H), 6.31 (s, 1H), 4.12 (dd,  $J = 18.4, 2.6$  Hz, 1H), 3.76 (dd,  $J = 18.4, 2.6$  Hz, 1H), 2.61 – 2.52 (m, 2H), 1.89 (t,  $J = 2.5$  Hz, 1H), 1.63 – 1.60 (m, 2H), 0.92 (t,  $J = 7.3$  Hz, 3H).  $^{13}\text{C}$  NMR (150 MHz,  $\text{CDCl}_3$ )  $\delta$  143.73, 139.34, 135.84, 132.95, 131.51, 128.84, 128.70, 128.65, 128.48, 128.39, 128.27, 119.34, 89.05, 82.52, 78.26, 72.75, 53.91, 38.02, 33.85, 24.42, 13.85. HRMS  $m/z$  (ESI) calcd for  $[\text{C}_{27}\text{H}_{25}\text{NO}_2\text{SNa}]$  ( $[\text{M}+\text{Na}]^+$ ): 450.1498, found: 450.1496.

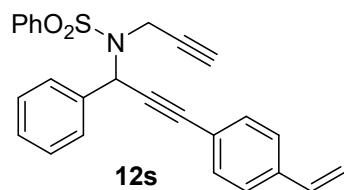

$^1\text{H}$  NMR (400 MHz,  $\text{CDCl}_3$ )  $\delta$  8.06 (d,  $J = 7.5$  Hz, 2H), 7.69 (d,  $J = 7.2$  Hz, 2H), 7.56 (t,  $J = 7.3$  Hz, 1H), 7.49 (t,  $J = 7.5$  Hz, 2H), 7.42 – 7.35 (m, 3H), 7.31 (d,  $J = 8.2$  Hz, 2H), 7.15 (d,  $J = 8.2$  Hz, 2H), 6.68 (dd,  $J = 17.6, 10.9$  Hz, 1H), 6.33 (s, 1H), 5.76 (d,  $J = 17.6$  Hz, 1H), 5.30 (d,  $J = 10.9$  Hz, 1H), 4.14 (dd,  $J = 18.5, 2.4$  Hz, 1H), 3.76 (dd,  $J = 18.5, 2.4$  Hz, 1H), 1.90 (t,  $J = 2.4$  Hz, 1H).  $^{13}\text{C}$  NMR (100 MHz,  $\text{CDCl}_3$ )  $\delta$  139.28, 137.88, 136.09, 135.60, 132.93, 131.73, 128.77, 128.71, 128.64, 128.31, 128.24, 126.05, 121.33, 115.16, 88.74, 83.84, 78.17, 72.76, 53.80, 33.79. HRMS  $m/z$  (ESI) calcd for  $[\text{C}_{26}\text{H}_{21}\text{NO}_2\text{SNa}]$  ( $[\text{M}+\text{Na}]^+$ ): 434.1185, found: 434.1185.

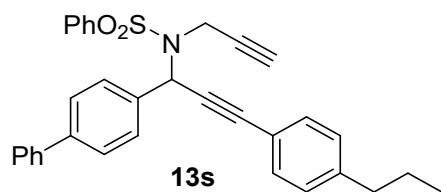

$^1\text{H}$  NMR (600 MHz,  $\text{CDCl}_3$ )  $\delta$  8.13 – 8.08 (m, 2H), 7.81 (d,  $J = 8.5$  Hz, 2H), 7.67 – 7.63 (m, 4H), 7.61 – 7.58 (m, 1H), 7.55 – 7.52 (m, 2H), 7.49 – 7.46 (m, 2H), 7.40 – 7.37 (m, 1H), 7.18 (d,  $J = 8.1$  Hz, 2H), 7.13 (d,  $J = 8.0$  Hz, 2H), 6.40 (s, 1H), 4.21 (dd,  $J = 18.4, 2.5$  Hz, 1H), 3.86 (dd,  $J = 18.4, 2.5$  Hz, 1H), 2.62 – 2.59 (m, 2H), 1.96 (t,  $J = 2.5$  Hz, 1H), 1.68 – 1.64 (m, 2H), 0.97 (t,  $J = 7.3$  Hz, 3H).  $^{13}\text{C}$  NMR (150 MHz,  $\text{CDCl}_3$ )  $\delta$  143.82, 141.63, 140.58, 139.36, 134.93, 133.05, 131.59, 129.00, 128.91, 128.58, 128.33, 127.71, 127.40, 127.27, 119.37, 89.18, 82.57, 78.33, 73.00, 53.78, 38.07, 33.99, 24.49, 13.93. HRMS  $m/z$  (ESI) calcd for  $[\text{C}_{33}\text{H}_{29}\text{NO}_2\text{SNa}]$  ( $[\text{M}+\text{Na}]^+$ ): 526.1811, found: 526.1811.

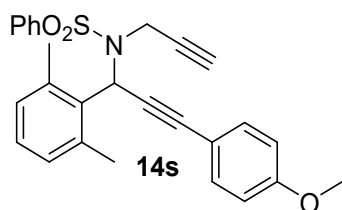

$^1\text{H}$  NMR (600 MHz,  $\text{CDCl}_3$ )  $\delta$  7.74 (dd,  $J = 8.5, 1.2$  Hz, 2H), 7.45 – 7.40 (m, 1H), 7.31 – 7.26 (m, 2H), 7.21 – 7.16 (m, 2H), 7.06 (t,  $J = 7.5$  Hz, 1H), 6.92 (d,  $J = 7.6$  Hz, 2H), 6.81 – 6.77 (m, 2H), 6.37 (s, 1H), 4.22 (d,  $J = 2.4$  Hz, 2H), 3.78 (s, 3H), 2.49 (s, 6H), 2.17 (t,  $J = 2.4$  Hz, 1H).  $^{13}\text{C}$  NMR (150 MHz,  $\text{CDCl}_3$ )  $\delta$  159.84, 140.07, 138.47, 133.04, 132.49, 132.37, 129.66, 128.54, 128.31, 128.18, 114.78, 113.93, 87.68, 83.94, 79.33, 73.34, 55.39, 50.15, 35.97, 21.02. HRMS (ESI)  $m/z$  calcd for  $[\text{C}_{27}\text{H}_{25}\text{NO}_3\text{SNa}]$  ( $[\text{M}+\text{Na}]^+$ ): 466.1447, found: 466.1446.

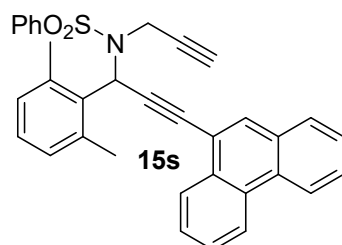

$^1\text{H}$  NMR (600 MHz,  $\text{CDCl}_3$ )  $\delta$  8.66 – 8.62 (m, 2H), 8.23 – 8.19 (m, 1H), 7.83 – 7.80 (m, 2H), 7.78 – 7.76 (m, 1H), 7.73 (s, 1H), 7.68 – 7.64 (m, 2H), 7.60 – 7.57 (m, 1H), 7.57 – 7.54 (m, 1H), 7.36 – 7.33 (m, 1H), 7.24 – 7.20 (m, 2H), 7.11 (t,  $J = 7.6$  Hz, 1H), 6.99 (d,  $J = 7.6$  Hz, 2H), 6.59 (s, 1H), 4.31 (t,  $J = 2.6$  Hz, 2H), 2.59 (s, 6H), 2.26 (t,  $J =$

2.4 Hz, 1H).  $^{13}\text{C}$  NMR (150 MHz,  $\text{CDCl}_3$ )  $\delta$  139.96, 138.56, 132.57, 132.35, 132.17, 131.11, 131.07, 130.34, 130.05, 129.79, 128.73, 128.53, 128.37, 127.71, 127.18, 127.08, 122.79, 122.73, 119.12, 89.77, 86.28, 79.36, 73.75, 50.23, 35.98, 21.21. HRMS  $m/z$  (ESI) calcd for  $[\text{C}_{34}\text{H}_{27}\text{NO}_2\text{SNa}]$  ( $[\text{M}+\text{Na}]^+$ ): 536.1655, found: 536.1656.

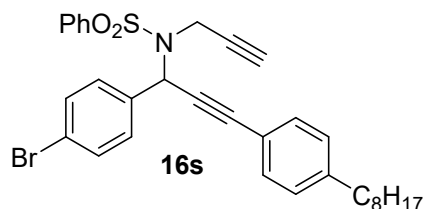

$^1\text{H}$  NMR (600 MHz,  $\text{CDCl}_3$ )  $\delta$  8.01 (dd,  $J = 8.4, 1.2$  Hz, 2H), 7.61 – 7.52 (m, 3H), 7.54 – 7.46 (m, 4H), 7.13 – 7.03 (m, 4H), 6.24 (s, 1H), 4.07 (dd,  $J = 18.3, 2.6$  Hz, 1H), 3.84 – 3.74 (m, 1H), 2.62 – 2.52 (m, 2H), 1.90 (t,  $J = 2.5$  Hz, 1H), 1.64 – 1.54 (s, 2H), 1.31 – 1.22 (m, 10H), 0.87 (t,  $J = 6.9$  Hz, 3H).  $^{13}\text{C}$  NMR (150 MHz,  $\text{CDCl}_3$ )  $\delta$  144.25, 139.06, 135.10, 133.07, 131.72, 131.52, 130.10, 128.92, 128.47, 128.19, 122.86, 118.94, 89.47, 81.77, 78.01, 73.04, 53.50, 35.98, 33.98, 31.95, 31.32, 29.79, 29.51, 29.33, 22.75, 14.20. HRMS  $m/z$  (ESI) calcd for  $[\text{C}_{32}\text{H}_{34}\text{NO}_2\text{SBrNa}]$  ( $[\text{M}+\text{Na}]^+$ ): 598.1386, found: 598.1385.

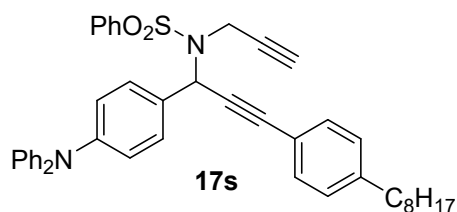

$^1\text{H}$  NMR (600 MHz,  $\text{CDCl}_3$ )  $\delta$  8.08 – 8.04 (m, 2H), 7.59 – 7.54 (m, 3H), 7.52 – 7.49 (m, 2H), 7.28 – 7.25 (m, 4H), 7.12 – 7.07 (m, 10H), 7.05 – 7.03 (m, 2H), 6.28 (s, 1H), 4.16 (dd,  $J = 18.4, 2.4$  Hz, 1H), 3.87 (dd,  $J = 18.4, 2.5$  Hz, 1H), 2.60 – 2.57 (m, 2H), 1.96 (t,  $J = 2.5$  Hz, 1H), 1.61 – 1.57 (m, 2H), 1.31 – 1.26 (m, 10H), 0.89 (t,  $J = 7.1$  Hz, 3H).  $^{13}\text{C}$  NMR (100 MHz,  $\text{CDCl}_3$ )  $\delta$  148.22, 147.52, 143.88, 139.40, 132.81, 131.41, 129.32, 129.27, 129.16, 128.74, 128.33, 128.17, 124.56, 123.18, 123.14, 119.24, 88.75, 82.72, 78.47, 72.52, 53.48, 35.90, 33.66, 31.88, 31.24, 29.44, 29.25, 22.68, 14.12. HRMS  $m/z$  (ESI) calcd for  $[\text{C}_{44}\text{H}_{44}\text{N}_2\text{O}_2\text{SNa}]$  ( $[\text{M}+\text{Na}]^+$ ): 687.3016, found: 687.3014.

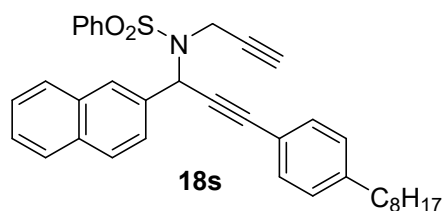

$^1\text{H}$  NMR (600 MHz,  $\text{CDCl}_3$ )  $\delta$  8.18 (s, 1H), 8.10 (d,  $J = 7.6$  Hz, 2H), 7.90 – 7.84 (m, 3H), 7.77 (d,  $J = 8.5$  Hz, 1H), 7.58 (t,  $J = 7.4$  Hz, 1H), 7.54 – 7.49 (m, 4H), 7.17 (d,  $J = 7.9$  Hz, 2H), 7.12 (d,  $J = 8.1$  Hz, 2H), 6.48 (s, 1H), 4.16 (d,  $J = 20.3$  Hz, 1H), 3.78 (d,  $J = 18.5$  Hz, 1H), 2.61 (t,  $J = 7.8$  Hz, 2H), 1.87 (s, 1H), 1.65 – 1.56 (m, 2H), 1.35 – 1.24 (m, 10H), 0.89 (t,  $J = 6.9$  Hz, 3H).  $^{13}\text{C}$  NMR (150 MHz,  $\text{CDCl}_3$ )  $\delta$  144.10, 139.33, 133.41, 133.25, 133.06, 133.01, 131.59, 128.86, 128.67, 128.49, 128.42, 128.36, 127.80, 127.69, 126.69, 126.47, 125.94, 119.33, 89.31, 82.49, 78.26, 72.89, 54.13, 36.02, 33.88, 31.99, 31.38, 29.56, 29.37, 22.79, 14.25. HRMS  $m/z$  (ESI) calcd for  $[\text{C}_{36}\text{H}_{37}\text{NO}_2\text{SNa}]$  ( $[\text{M}+\text{Na}]^+$ ): 570.2437, found: 570.2439.

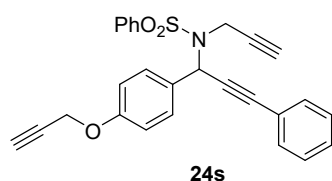

$^1\text{H}$  NMR (600 MHz,  $\text{CDCl}_3$ )  $\delta$  8.04 (d,  $J = 7.4$  Hz, 2H), 7.62 (d,  $J = 8.7$  Hz, 2H), 7.55 (t,  $J = 7.4$  Hz, 1H), 7.48 (t,  $J = 7.7$  Hz, 2H), 7.30 (t,  $J = 7.3$  Hz, 1H), 7.26 (t,  $J = 7.3$  Hz, 2H), 7.19 (d,  $J = 7.0$  Hz, 2H), 6.99 (d,  $J = 8.7$  Hz, 2H), 6.27 (s, 1H), 4.69 (d,  $J = 2.3$  Hz, 2H), 4.16 – 4.10 (m, 1H), 3.77 (dd,  $J = 18.4, 2.4$  Hz, 1H), 2.54 (t,  $J = 2.3$  Hz, 1H), 1.93 (t,  $J = 2.1$  Hz, 1H).  $^{13}\text{C}$  NMR (150 MHz,  $\text{CDCl}_3$ )  $\delta$  157.93, 139.32, 133.05, 131.62, 129.76, 128.90, 128.84, 128.66, 128.39, 128.27, 122.15, 115.01, 88.73, 83.46, 78.51, 78.34, 75.98, 72.93, 55.97, 53.33, 33.73. HRMS  $m/z$  (ESI) calcd for  $[\text{C}_{27}\text{H}_{21}\text{NO}_3\text{SNa}]$  ( $[\text{M}+\text{Na}]^+$ ): 462.1134, found: 462.1127.

## Synthesis of the new fluorophore

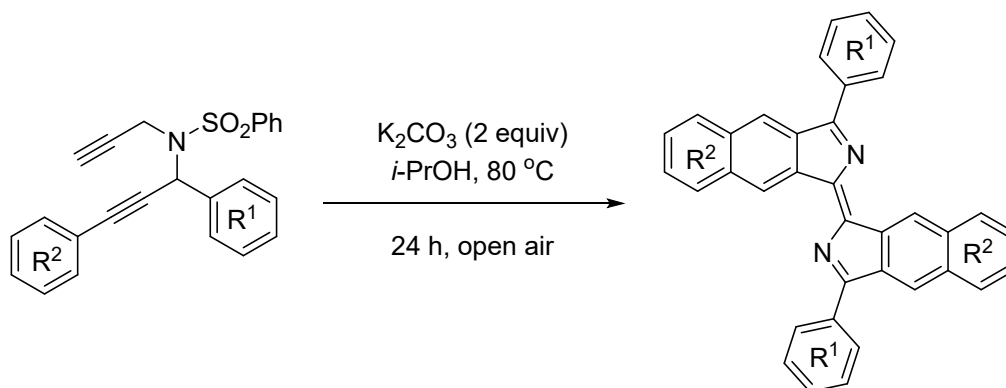

**General procedure 1:** In a flame-dried Schlenk tube, dipropargyl sulfonamide (0.2 mmol, 1 equiv) and K<sub>2</sub>CO<sub>3</sub> (0.4 mmol, 2 equiv) were dissolved in *i*-PrOH (1 mL) under open air conditions. The reaction mixture was stirred at 80 °C for 24 h. Upon completion of the reaction as monitored by TLC, the reaction was quenched with MeOH (5 mL). The suspension was filtered and the filter residue was washed with 5 mL water and 5 mL MeOH to get the crude product. The crude material was purified by silica gel flash chromatography using petroleum ether, dichloromethane and methanol to yield the corresponding product.

**General procedure 2:** In a flame-dried Schlenk tube, dipropargyl sulfonamide (0.2 mmol, 1 equiv) and K<sub>2</sub>CO<sub>3</sub> (0.4 mmol, 2 equiv) were dissolved in *n*-BuOH (1 mL) under open air conditions. The reaction mixture was stirred at 110 °C for 24 h. Upon completion of the reaction as monitored by TLC, the reaction was quenched with MeOH (5 mL). The suspension was filtered and the filter residue was washed with 5 mL water and 5 mL MeOH to get the crude product. The crude material was purified by silica gel flash chromatography using petroleum ether, dichloromethane and methanol to yield the corresponding product.

## Characterization data for the new fluorophore

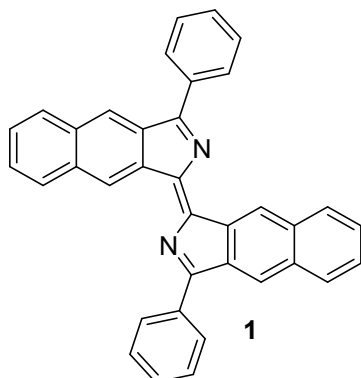

Following the general procedure 1, **1** was obtained as a purple solid (23.1 mg, 48% yield).  $^1\text{H}$  NMR (400 MHz,  $\text{CDCl}_3$ )  $\delta$  9.49 (s, 2H), 8.45 – 8.40 (m, 4H), 8.36 (s, 2H), 8.12 (d,  $J = 7.8$  Hz, 2H), 7.99 (d,  $J = 7.8$  Hz, 2H), 7.73 – 7.65 (m, 6H), 7.62 – 7.55 (m, 4H).  $^{13}\text{C}$  NMR (150 MHz,  $\text{CDCl}_3$ )  $\delta$  170.75, 148.39, 137.13, 135.36, 134.99, 133.73, 133.16, 131.12, 130.06, 129.90, 129.26, 129.06, 127.86, 127.49, 126.96, 122.98. IR (thin film)  $\nu$  1403, 1411, 1472, 2596, 2851, 2921  $\text{cm}^{-1}$ . HRMS  $m/z$  (ESI) calcd for  $[\text{C}_{36}\text{H}_{22}\text{N}_2\text{H}]$  ( $[\text{M}+\text{H}]^+$ ): 483.1856, found: 483.1855.

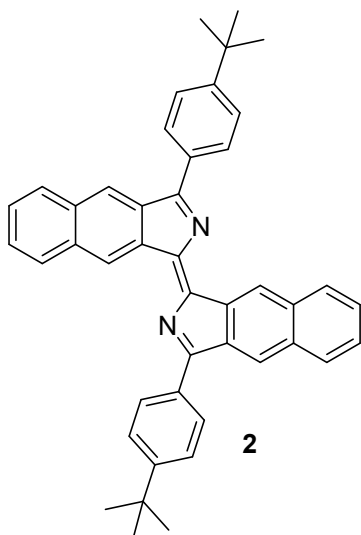

Following the general procedure 1, **2** was obtained as a red solid (23.2 mg, 39% yield).  $^1\text{H}$  NMR (600 MHz,  $\text{CDCl}_3$ )  $\delta$  9.51 (s, 2H), 8.40 (s, 2H), 8.39 – 8.36 (m, 4H), 8.13 (d,  $J = 8.0$  Hz, 2H), 7.99 (d,  $J = 7.9$  Hz, 2H), 7.72 – 7.70 (m, 4H), 7.60 – 7.57 (m, 2H), 7.57 – 7.54 (m, 2H), 1.46 (s, 18H).  $^{13}\text{C}$  NMR (100 MHz,  $\text{CDCl}_3$ )  $\delta$  169.32, 153.53, 147.15, 136.20, 134.44, 132.63, 132.05, 131.19, 128.93, 128.75, 127.92, 126.63, 126.27, 125.75, 124.95, 121.83, 34.12, 30.29. IR (thin film)  $\nu$  1457, 1473, 1684, 1698,



1716, 2854, 2924, 2960  $\text{cm}^{-1}$ . HRMS  $m/z$  (ESI) calcd for  $[\text{C}_{44}\text{H}_{38}\text{N}_2\text{H}]$  ( $[\text{M}+\text{H}]^+$ ): 595.3108, found: 595.3107.

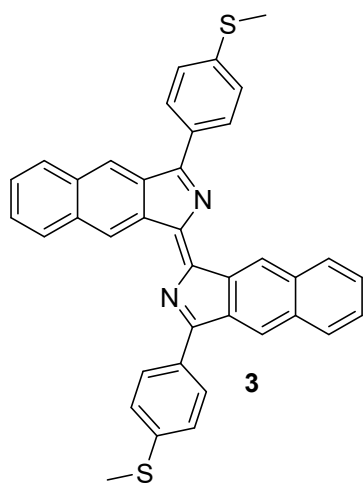

Following the general procedure 1, **3** was obtained as a red solid (32.2 mg, 56% yield).  $^1\text{H}$  NMR (400 MHz,  $\text{CDCl}_3/\text{CF}_3\text{COOD}$ , 5:1)  $\delta$  9.54 (s, 2H), 9.07 (s, 2H), 8.31 (d,  $J = 8.3$  Hz, 4H), 8.26 (d,  $J = 8.2$  Hz, 4H), 8.02 (t,  $J = 7.5$  Hz, 2H), 7.95 (t,  $J = 7.5$  Hz, 2H), 7.64 (d,  $J = 8.1$  Hz, 4H), 2.71 (s, 6H).  $^{13}\text{C}$  NMR (150 MHz,  $\text{CDCl}_3/\text{CF}_3\text{COOD}$ , 5:1)  $\delta$  166.84, 156.87, 136.41, 134.55, 134.14, 133.21, 131.97, 131.70, 131.49, 131.12, 130.76, 128.61, 128.23, 128.01, 126.65, 120.88, 14.57. IR (thin film)  $\nu$  1592, 1664, 2932, 3035, 3068, 3082  $\text{cm}^{-1}$ . HRMS  $m/z$  (ESI) calcd for  $[\text{C}_{38}\text{H}_{26}\text{N}_2\text{S}_2\text{Na}]$  ( $[\text{M}+\text{Na}]^+$ ): 597.1430, found: 597.1427.

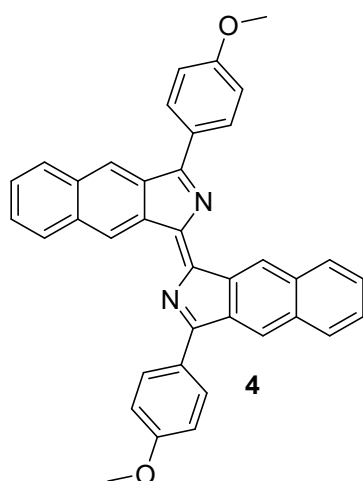

Following the general procedure 2, **4** was obtained as a red solid (31.4 mg, 58% yield).  $^1\text{H}$  NMR (400 MHz,  $\text{CDCl}_3/\text{CF}_3\text{COOD}$ , 5:1)  $\delta$  9.27 (s, 2H), 8.86 (s, 2H), 8.41 (d,  $J = 8.5$  Hz, 4H), 8.28 (d,  $J = 8.1$  Hz, 2H), 8.19 (d,  $J = 8.1$  Hz, 2H), 7.90 (t,  $J = 7.5$  Hz, 2H), 7.83 (t,  $J = 7.5$  Hz, 2H), 7.31 (d,  $J = 8.6$  Hz, 4H), 4.07 (s, 6H).  $^{13}\text{C}$  NMR (150 MHz,

CDCl<sub>3</sub>/CF<sub>3</sub>COOD, 5:1)  $\delta$  170.03, 168.16, 136.28, 134.59, 133.76, 133.44, 132.61, 132.33, 131.38, 130.85, 130.74, 129.88, 128.77, 127.97, 118.55, 116.54, 56.48. IR (thin film)  $\nu$  1497, 1555, 1597, 1668, 1743, 2850, 2922 cm<sup>-1</sup>. HRMS  $m/z$  (ESI) calcd for [C<sub>38</sub>H<sub>26</sub>N<sub>2</sub>O<sub>2</sub>Na] ([M+Na]<sup>+</sup>): 565.1886, found: 565.1881.

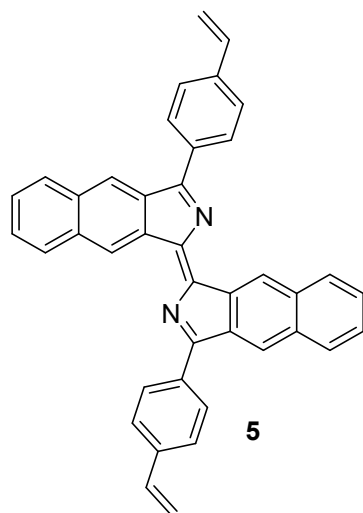

Following the general procedure 1, **5** was obtained as a red solid (12.8 mg, 24% yield). <sup>1</sup>H NMR (600 MHz, CDCl<sub>3</sub>)  $\delta$  9.47 (s, 2H), 8.41 (d,  $J$  = 8.2 Hz, 4H), 8.37 (s, 2H), 8.11 (d,  $J$  = 8.0 Hz, 2H), 7.98 (d,  $J$  = 7.9 Hz, 2H), 7.71 (d,  $J$  = 8.1 Hz, 4H), 7.59 (t,  $J$  = 7.2 Hz, 2H), 7.55 (t,  $J$  = 7.9 Hz, 2H), 6.88 (dd,  $J$  = 17.6, 10.8 Hz, 2H), 5.97 (d,  $J$  = 17.6 Hz, 2H), 5.43 (d,  $J$  = 10.9 Hz, 2H). <sup>13</sup>C NMR (150 MHz, CDCl<sub>3</sub>)  $\delta$  169.99, 148.39, 140.24, 137.18, 136.51, 135.35, 134.35, 133.69, 133.13, 130.03, 129.89, 129.48, 127.78, 127.49, 126.96, 126.85, 122.95, 115.76. IR (thin film)  $\nu$  1474, 1500, 1603, 1623, 2849, 2918 cm<sup>-1</sup>. HRMS  $m/z$  (ESI) calcd for [C<sub>40</sub>H<sub>26</sub>N<sub>2</sub>H] ([M+H]<sup>+</sup>): 535.2169, found: 535.2169.

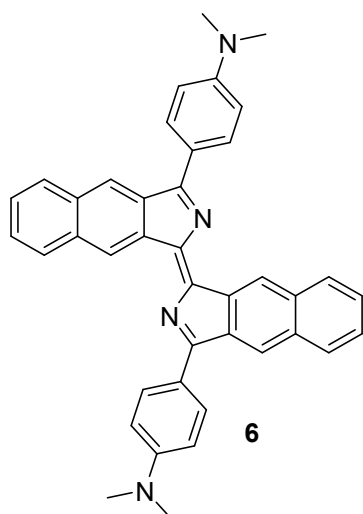

Following the general procedure 2, **6** was obtained as a black solid (25.6 mg, 45 % yield). <sup>1</sup>H NMR (600 MHz, CDCl<sub>3</sub>/CF<sub>3</sub>COOD, 5:1)  $\delta$  9.50 (s, 2H), 9.00 (s, 2H), 8.43

(d,  $J = 8.8$  Hz, 4H), 8.26 (d,  $J = 8.3$  Hz, 4H), 7.96 (t,  $J = 7.6$  Hz, 2H), 7.90 (t,  $J = 7.5$  Hz, 2H), 7.59 (d,  $J = 8.8$  Hz, 4H), 3.48 (s, 12H).  $^{13}\text{C}$  NMR (150 MHz,  $\text{CDCl}_3/\text{CF}_3\text{COOD}$ , 5:1)  $\delta$  159.69, 152.52, 136.01, 134.37, 134.23, 133.89, 132.47, 132.32, 131.42, 131.21, 131.01, 130.24, 128.93, 128.18, 127.01, 119.17, 44.11. IR (thin film)  $\nu$  1433, 1455, 1598, 2850, 2919  $\text{cm}^{-1}$ . HRMS  $m/z$  (ESI) calcd for  $[\text{C}_{40}\text{H}_{32}\text{N}_4\text{H}]$  ( $[\text{M}+\text{H}]^+$ ): 569.2700, found: 569.2708.

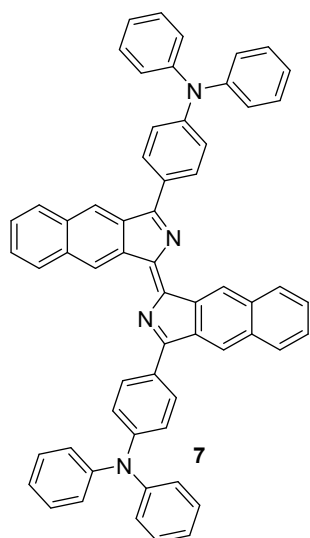

Following the general procedure 1, **7** was obtained as a black solid (28.6 mg, 35% yield).  $^1\text{H}$  NMR (600 MHz,  $\text{CDCl}_3/\text{CF}_3\text{COOD}$ , 5:1)  $\delta$  8.95 (s, 2H), 8.84 (s, 2H), 8.29 (d,  $J = 9.1$  Hz, 4H), 8.17 (t,  $J = 8.3$  Hz, 4H), 7.86 (t,  $J = 7.2$  Hz, 2H), 7.82 (t,  $J = 7.5$  Hz, 2H), 7.53 (t,  $J = 7.8$  Hz, 8H), 7.43 (t,  $J = 7.5$  Hz, 4H), 7.35 (d,  $J = 7.5$  Hz, 8H), 7.22 (d,  $J = 9.1$  Hz, 4H).  $^{13}\text{C}$  NMR (150 MHz,  $\text{CDCl}_3/\text{CF}_3\text{COOD}$ , 5:1)  $\delta$  162.85, 156.94, 143.50, 135.74, 134.16, 133.84, 132.14, 132.02, 130.98, 130.52, 130.42, 129.83, 129.07, 128.94, 128.36, 127.63, 127.30, 127.09, 119.10, 116.27. IR (thin film)  $\nu$  1448, 1462, 1487, 1583, 2851, 2921, 2958  $\text{cm}^{-1}$ . HRMS  $m/z$  (ESI) calcd for  $[\text{C}_{60}\text{H}_{40}\text{N}_4\text{H}]$  ( $[\text{M}+\text{H}]^+$ ): 817.3326, found: 817.3317.

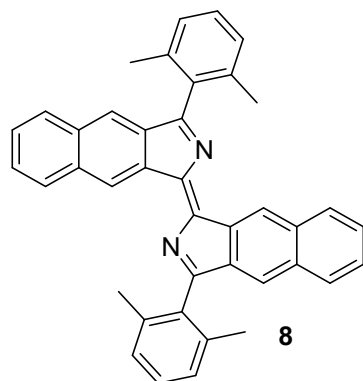

Following the general procedure 1, **8** was obtained as a yellow solid (17.2 mg, 32% yield).  $^1\text{H}$  NMR (400 MHz,  $\text{CDCl}_3$ )  $\delta$  9.38 (s, 2H), 8.08 (d,  $J = 8.1$  Hz, 2H), 7.85 (d,  $J$

= 7.9 Hz, 2H), 7.69 (s, 2H), 7.57 – 7.52 (m, 2H), 7.51 – 7.47 (m, 2H), 7.44 – 7.38 (m, 2H), 7.30 (d,  $J = 7.6$  Hz, 4H), 2.35 (s, 12H).  $^{13}\text{C}$  NMR (150 MHz,  $\text{CDCl}_3$ )  $\delta$  174.84, 148.50, 137.18, 137.05, 135.74, 134.35, 134.17, 133.40, 130.19, 129.63, 129.14, 127.91, 127.81, 127.46, 126.99, 121.81, 20.61. IR (thin film)  $\nu$  1462, 1647, 1735, 2850, 2955  $\text{cm}^{-1}$ . HRMS  $m/z$  (ESI) calcd for  $[\text{C}_{40}\text{H}_{30}\text{N}_2\text{H}]$  ( $[\text{M}+\text{H}]^+$ ): 539.2482, found: 539.2480.

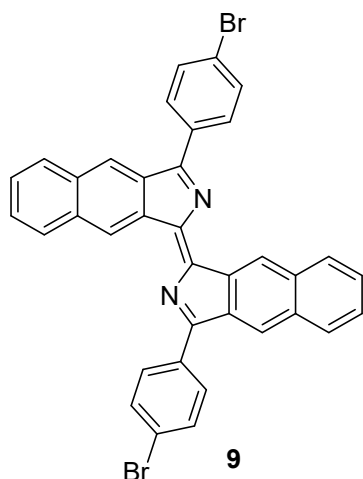

Following the general procedure, **9** was obtained as a red solid (30.6 mg, 48% yield).  $^1\text{H}$  NMR (600 MHz,  $\text{CDCl}_3/\text{CF}_3\text{COOD}$ , 5:1)  $\delta$  9.19 (s, 2H), 8.87 (s, 2H), 8.25 – 8.19 (m, 8H), 8.02 (d,  $J = 8.6$  Hz, 4H), 7.97 (t,  $J = 7.7$  Hz, 2H), 7.89 (t,  $J = 7.5$  Hz, 2H).  $^{13}\text{C}$  NMR (150 MHz,  $\text{CDCl}_3/\text{CF}_3\text{COOD}$ , 5:1)  $\delta$  172.18, 136.61, 134.91, 134.26, 134.14, 133.93, 133.79, 133.28, 132.30, 132.10, 131.55, 131.05, 130.70, 128.15, 127.66, 124.47. IR (thin film)  $\nu$  1471, 1507, 1590, 2849, 2919  $\text{cm}^{-1}$ . HRMS  $m/z$  (AP-MALDI) calcd for  $[\text{C}_{36}\text{H}_{20}\text{N}_2\text{Br}_2\text{H}]$  ( $[\text{M}+\text{H}]^+$ ): 639.0066, found: 639.0078.

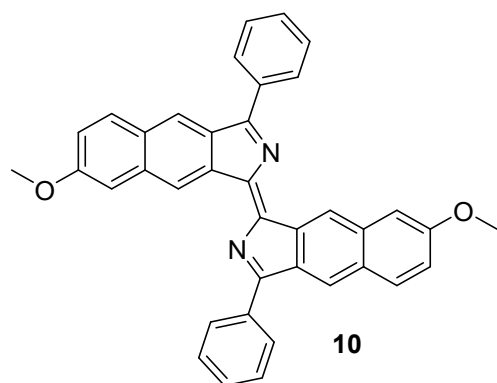

Following the general procedure, **10** was obtained as a red solid (20.1 mg, 37% yield).  $^1\text{H}$  NMR (400 MHz,  $\text{CDCl}_3/\text{CF}_3\text{COOD}$ , 5:1)  $\delta$  9.25 (s, 2H), 8.66 (s, 2H), 8.27 (d,  $J = 7.6$  Hz, 4H), 8.04 (d,  $J = 9.0$  Hz, 2H), 7.94 (t,  $J = 7.4$  Hz, 2H), 7.81 (t,  $J = 7.6$  Hz, 4H), 7.57 (s, 2H), 7.43 (d,  $J = 8.9$  Hz, 2H), 4.06 (s, 6H).  $^{13}\text{C}$  NMR (100 MHz,

CDCl<sub>3</sub>/CF<sub>3</sub>COOD, 5:1)  $\delta$  172.53, 163.92, 139.41, 136.52, 133.75, 133.57, 133.46, 131.03, 130.17, 129.88, 129.25, 129.16, 126.27, 125.82, 124.11, 109.13, 56.11. IR (thin film)  $\nu$  1511, 1589, 1600, 1780, 2854, 2924 cm<sup>-1</sup>. HRMS  $m/z$  (ESI) calcd for [C<sub>38</sub>H<sub>26</sub>N<sub>2</sub>O<sub>2</sub>H] ([M+H]<sup>+</sup>): 543.2067, found: 543.2070.

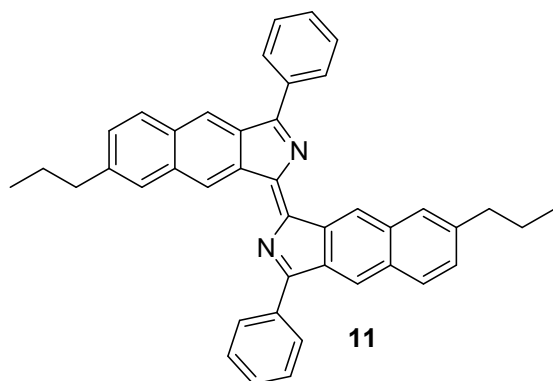

Following the general procedure 2, **11** was obtained as a red solid (29.4 mg, 52% yield). <sup>1</sup>H NMR (400 MHz, CDCl<sub>3</sub>)  $\delta$  9.42 (s, 2H), 8.43 (d,  $J$  = 7.2 Hz, 4H), 8.31 (s, 2H), 7.95 – 7.86 (m, 4H), 7.73 – 7.62 (m, 6H), 7.41 (d,  $J$  = 8.2 Hz, 2H), 2.83 (t,  $J$  = 7.6 Hz, 4H), 1.87 – 1.73 (m, 4H), 1.03 (t,  $J$  = 7.3 Hz, 6H). <sup>13</sup>C NMR (150 MHz, CDCl<sub>3</sub>)  $\delta$  170.79, 148.44, 142.25, 137.30, 135.13, 134.78, 134.00, 131.63, 131.00, 129.71, 129.24, 129.03, 128.69, 128.66, 127.47, 122.77, 38.40, 24.54, 14.00. IR (thin film)  $\nu$  1471, 1501, 1718, 2850, 2923, 2956 cm<sup>-1</sup>. HRMS  $m/z$  (ESI) calcd for [C<sub>42</sub>H<sub>34</sub>N<sub>2</sub>H] ([M+H]<sup>+</sup>): 567.2795, found: 567.2795.

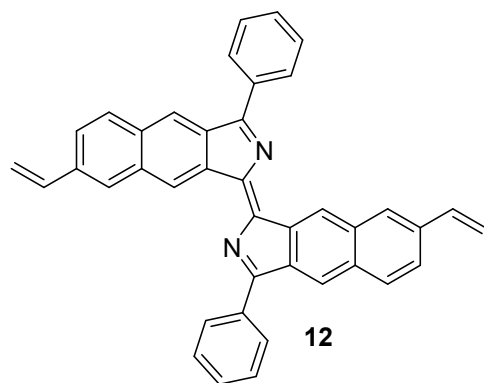

Following the general procedure 1, **12** was obtained as a red solid (18.2 mg, 34% yield). <sup>1</sup>H NMR (400 MHz, CDCl<sub>3</sub>)  $\delta$  9.37 (s, 2H), 8.39 (d,  $J$  = 7.6 Hz, 4H), 8.18 (s, 2H), 7.94 (s, 2H), 7.88 (d,  $J$  = 8.5 Hz, 2H), 7.71 – 7.66 (m, 8H), 6.94 (dd,  $J$  = 17.6, 10.9 Hz, 2H), 5.96 (d,  $J$  = 17.6 Hz, 2H), 5.43 (d,  $J$  = 10.8 Hz, 2H). <sup>13</sup>C NMR (150 MHz, CDCl<sub>3</sub>)  $\delta$  170.61, 148.42, 137.55, 136.89, 136.59, 135.29, 134.97, 133.83, 132.74, 131.07, 130.07, 129.27, 129.02, 128.49, 127.96, 124.17, 122.64, 115.04. IR (thin film)  $\nu$  1445, 1473, 2980, 3006, 3050 cm<sup>-1</sup>. HRMS  $m/z$  (ESI) calcd for [C<sub>40</sub>H<sub>26</sub>N<sub>2</sub>H] ([M+H]<sup>+</sup>): 535.2169, found: 535.2169.

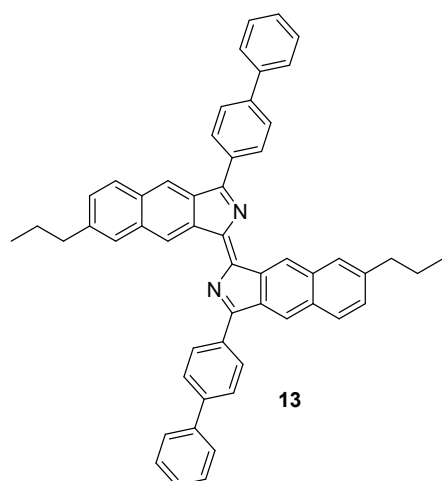

Following the general procedure 1, **13** was obtained as a red solid (34.5 mg, 48% yield).  $^1\text{H}$  NMR (400 MHz,  $\text{CDCl}_3/\text{CF}_3\text{COOD}$ , 5:1)  $\delta$  9.16 (s, 2H), 8.93 (s, 2H), 8.45 (d,  $J = 8.3$  Hz, 4H), 8.17 (d,  $J = 8.4$  Hz, 2H), 8.11 – 8.04 (m, 6H), 7.79 (d,  $J = 7.2$  Hz, 4H), 7.74 (d,  $J = 8.5$  Hz, 2H), 7.63 – 7.53 (m, 6H), 2.90 (t,  $J = 7.6$  Hz, 4H), 1.88 – 1.76 (m, 4H), 1.03 (t,  $J = 7.3$  Hz, 6H).  $^{13}\text{C}$  NMR (100 MHz,  $\text{CDCl}_3/\text{CF}_3\text{COOD}$ , 5:1)  $\delta$  171.36, 150.80, 150.22, 138.30, 136.97, 134.74, 132.96, 132.44, 132.10, 131.82, 129.96, 129.86, 129.65, 129.47, 128.89, 128.35, 127.55, 126.73, 124.20, 38.50, 23.83, 13.50. IR (thin film)  $\nu$  1556, 1602, 1681, 2873, 2930, 2962  $\text{cm}^{-1}$ . HRMS  $m/z$  (ESI) calcd for  $[\text{C}_{54}\text{H}_{42}\text{N}_2\text{H}]$  ( $[\text{M}+\text{H}]^+$ ): 719.3421, found: 719.3420.

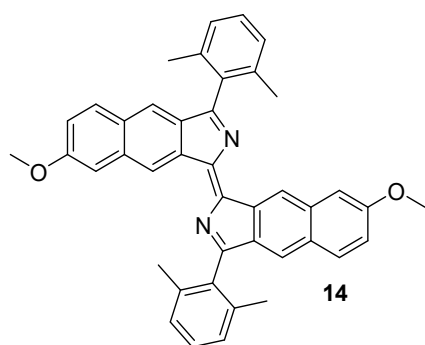

Following the general procedure 1, **14** was obtained as a yellow solid (13.2 mg, 22% yield).  $^1\text{H}$  NMR (600 MHz,  $\text{CDCl}_3$ )  $\delta$  9.29 (s, 2H), 7.72 (d,  $J = 8.9$  Hz, 2H), 7.60 (s, 2H), 7.41 – 7.37 (m, 4H), 7.29 (d,  $J = 7.6$  Hz, 4H), 7.15 (d,  $J = 8.8$  Hz, 2H), 3.94 (s, 6H), 2.35 (s, 12H).  $^{13}\text{C}$  NMR (150 MHz,  $\text{CDCl}_3$ )  $\delta$  174.73, 158.93, 148.68, 137.19, 136.71, 135.64, 135.48, 134.69, 130.93, 129.02, 128.65, 127.84, 126.67, 121.50, 119.83, 108.03, 55.58, 20.58. IR (thin film)  $\nu$  1417, 1463, 1503, 1620, 2833, 2922, 2960, 3003, 3060  $\text{cm}^{-1}$ . HRMS  $m/z$  (ESI) calcd for  $[\text{C}_{42}\text{H}_{34}\text{N}_2\text{O}_2\text{Na}]$  ( $[\text{M}+\text{Na}]^+$ ): 621.2512, found: 621.2510.

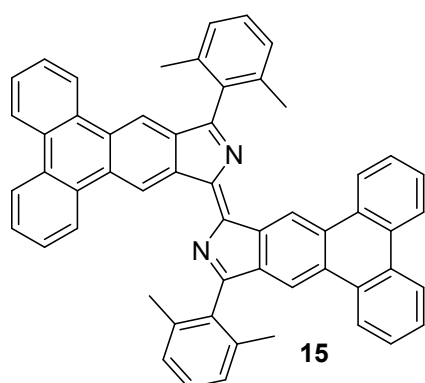

Following the general procedure 1, **15** was obtained as a yellow solid (14.8 mg, 20% yield).  $^1\text{H}$  NMR (400 MHz,  $\text{CDCl}_3/\text{CF}_3\text{COOD}$ , 5:0.1)  $\delta$  10.30 (s, 2H), 8.86 (d,  $J = 8.1$  Hz, 2H), 8.73 (s, 2H), 8.71 – 8.65 (m, 4H), 8.54 (d,  $J = 8.1$  Hz, 2H), 7.80 – 7.71 (m, 6H), 7.68 (t,  $J = 7.5$  Hz, 2H), 7.58 (t,  $J = 7.7$  Hz, 2H), 7.42 (d,  $J = 7.7$  Hz, 4H), 2.45 (s, 12H).  $^{13}\text{C}$  NMR (100 MHz,  $\text{CDCl}_3/\text{CF}_3\text{COOD}$ , 5:0.1)  $\delta$  177.99, 137.03, 134.76, 134.18, 133.70, 132.22, 131.19, 130.97, 129.55, 129.19, 129.10, 129.03, 128.53, 128.34, 127.87, 125.06, 124.86, 123.84, 123.71, 123.47, 121.42, 20.55. IR (thin film)  $\nu$  1471, 1647, 2850, 2920  $\text{cm}^{-1}$ . HRMS  $m/z$  (ESI) calcd for  $[\text{C}_{56}\text{H}_{38}\text{N}_2\text{H}]$  ( $[\text{M}+\text{H}]^+$ ): 739.3108, found: 739.3108.

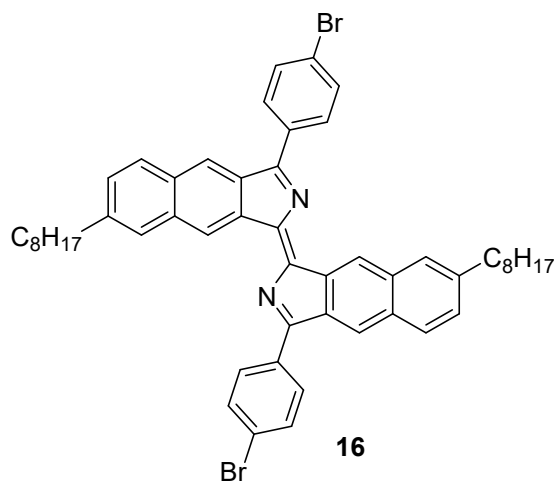

Following the general procedure 1, **16** was obtained as a yellow solid (35.4 mg, 41% yield).  $^1\text{H}$  NMR (600 MHz,  $\text{CDCl}_3/\text{CF}_3\text{COOD}$ , 5:1)  $\delta$  9.05 (s, 2H), 8.82 (s, 2H), 8.20 (d,  $J = 8.4$  Hz, 4H), 8.13 (d,  $J = 8.5$  Hz, 2H), 8.04 – 7.99 (m, 6H), 7.75 (d,  $J = 8.3$  Hz, 2H), 2.91 (t,  $J = 7.7$  Hz, 4H), 1.79 – 1.74 (m, 4H), 1.45 – 1.28 (m, 20H), 0.87 (t,  $J = 6.7$  Hz, 6H).  $^{13}\text{C}$  NMR (150 MHz,  $\text{CDCl}_3/\text{CF}_3\text{COOD}$ , 5:1)  $\delta$  171.59, 151.40, 137.16, 135.15, 134.09, 133.31, 132.48, 132.39, 132.29, 132.16, 130.18, 129.74, 128.14, 126.49, 124.28, 36.73, 31.85, 30.85, 29.77, 29.40, 29.18, 22.64, 13.92. IR (thin film)  $\nu$

1464, 1584, 2850, 2919  $\text{cm}^{-1}$ . HRMS  $m/z$  (AP-MALDI) calcd for  $[\text{C}_{52}\text{H}_{52}\text{N}_2\text{Br}_2\text{H}]$  ( $[\text{M}+\text{H}]^+$ ): 863.2570, found: 863.2582.

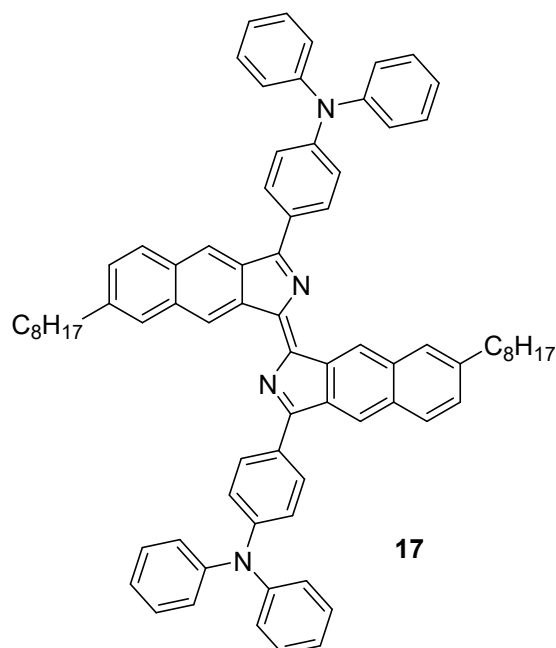

Following the general procedure 1, **17** was obtained as a black solid (41.6 mg, 40% yield).  $^1\text{H}$  NMR (400 MHz,  $\text{CDCl}_3$ )  $\delta$  9.43 (s, 2H), 8.45 – 8.33 (m, 6H), 7.94 – 7.81 (m, 4H), 7.42 – 7.33 (m, 10H), 7.32 – 7.26 (m, 12H), 7.15 (t,  $J = 7.3$  Hz, 4H), 2.81 (t,  $J = 7.7$  Hz, 4H), 1.78 – 1.69 (m, 4H), 1.38 – 1.26 (m, 20H), 0.88 (t,  $J = 6.6$  Hz, 6H).  $^{13}\text{C}$  NMR (100 MHz,  $\text{CDCl}_3$ )  $\delta$  168.66, 157.01, 150.45, 147.79, 147.10, 142.18, 137.62, 134.76, 133.78, 131.40, 130.25, 129.56, 128.45, 128.30, 128.22, 126.90, 125.61, 124.08, 122.50, 121.86, 36.33, 31.92, 31.51, 29.56, 29.44, 29.31, 22.70, 14.14. IR (thin film)  $\nu$  1408, 1424, 1466, 1489, 1588, 2852, 2924, 2953  $\text{cm}^{-1}$ . HRMS  $m/z$  (ESI) calcd for  $[\text{C}_{76}\text{H}_{72}\text{N}_4\text{Na}]$  ( $[\text{M}+\text{Na}]^+$ ): 1063.5649, found: 1063.5645.

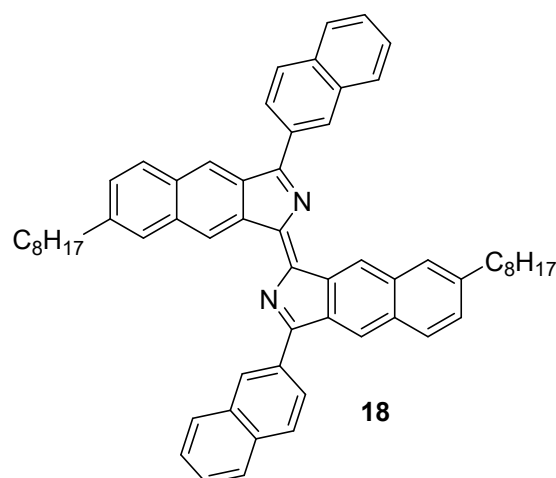



Following the general procedure 1, **18** was obtained as a red solid (49.2 mg, 61% yield).  $^1\text{H}$  NMR (400 MHz,  $\text{CDCl}_3$ )  $\delta$  9.39 (s, 2H), 8.83 (s, 2H), 8.55 (d,  $J = 8.4$  Hz, 2H), 8.27 (s, 2H), 8.10 (d,  $J = 8.1$  Hz, 4H), 8.03 – 7.96 (m, 2H), 7.86 (d,  $J = 8.3$  Hz, 2H), 7.80 (s, 2H), 7.67 – 7.60 (m, 4H), 7.39 (d,  $J = 8.2$  Hz, 2H), 2.79 (t,  $J = 7.7$  Hz, 4H), 1.82 – 1.67 (m, 4H), 1.41 – 1.27 (m, 20H), 0.89 (t,  $J = 6.6$  Hz, 6H).  $^{13}\text{C}$  NMR (100 MHz,  $\text{CDCl}_3$ )  $\delta$  170.11, 148.45, 142.30, 137.29, 134.71, 134.65, 133.84, 133.28, 132.66, 131.47, 129.63, 129.25, 129.16, 128.61, 128.46, 128.38, 127.97, 127.43, 127.36, 126.58, 126.36, 122.60, 36.30, 31.95, 31.40, 29.59, 29.51, 29.36, 22.72, 14.16. IR (thin film)  $\nu$  1456, 1487, 1597, 1623, 1698, 2851, 2924, 2953  $\text{cm}^{-1}$ . HRMS  $m/z$  (ESI) calcd for  $[\text{C}_{60}\text{H}_{58}\text{N}_2\text{Na}]$  ( $[\text{M}+\text{Na}]^+$ ): 829.4492, found: 829.4497.

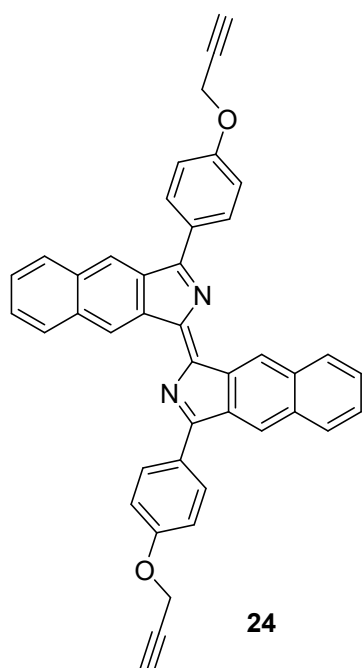

Following the general procedure, **24** was obtained as a purple solid (23 mg, 39% yield).  $^1\text{H}$  NMR (400 MHz,  $\text{CDCl}_3/\text{CF}_3\text{COOD}$ , 5:1)  $\delta$  9.24 (s, 1H), 8.89 (s, 1H), 8.45 (d,  $J = 8.8$  Hz, 2H), 8.28 (d,  $J = 8.2$  Hz, 1H), 8.21 (d,  $J = 8.1$  Hz, 1H), 7.93 (t,  $J = 7.4$  Hz, 1H), 7.86 (t,  $J = 7.4$  Hz, 1H), 7.43 (d,  $J = 8.8$  Hz, 2H), 4.97 (d,  $J = 2.0$  Hz, 2H), 2.69 (s, 1H).  $^{13}\text{C}$  NMR (100 MHz,  $\text{CDCl}_3/\text{CF}_3\text{COOD}$ , 5:1)  $\delta$  170.41, 165.83, 136.30, 134.35, 133.87, 133.72, 132.86, 132.21, 131.46, 130.87, 130.80, 129.93, 128.48, 127.74, 118.99, 117.28, 77.49, 75.90, 56.73. IR (thin film)  $\nu$  1407, 1426, 1452, 1469, 1513, 1601, 2112, 2927, 2956, 3049, 3209, 3279  $\text{cm}^{-1}$ . HRMS  $m/z$  (ESI) calcd for  $[\text{C}_{42}\text{H}_{26}\text{N}_2\text{O}_2\text{H}]$  ( $[\text{M}+\text{H}]^+$ ): 591.2067, found: 591.2065.

# Synthetic applications

## C-B Bond Coupling

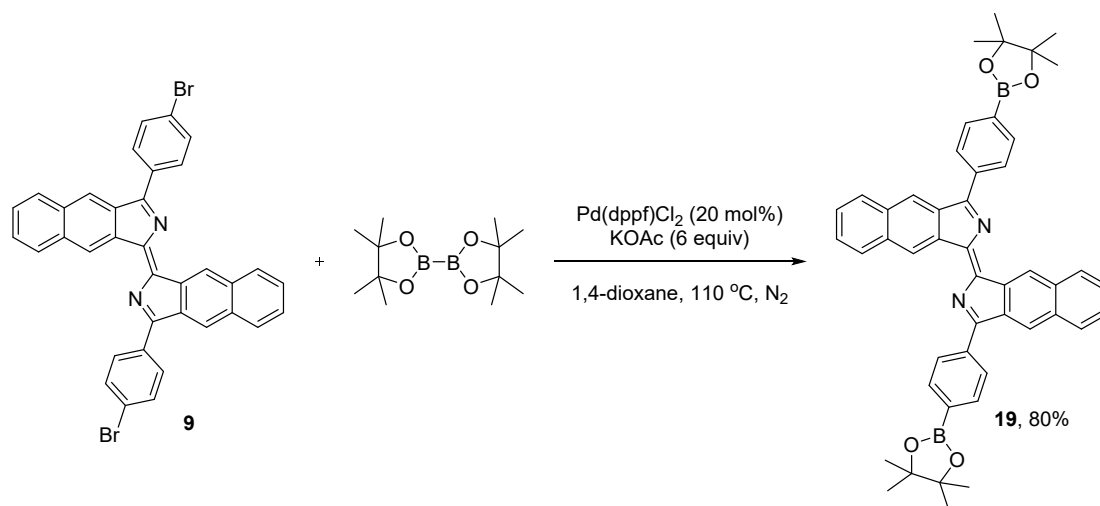

To an oven-dried seal tube were charged with  $Pd(dppf)Cl_2$  (16.2 mg, 0.02 mmol), KOAc (58.9 mg, 0.6 mmol), **8** (0.1 mmol, 63.8 mg),  $B_2pin_2$  (0.22 mmol, 55.9 mg) and 1,4-dioxane (2 mL). The tube was sealed with a Teflon valve, heated at 110 °C and stirred for 24 h. The reaction mixture was concentrated under reduced pressure and the residue was purified by flash column chromatography on silica gel using petroleum ether and dichloromethane to give product **19** as a red solid in 80% yield.

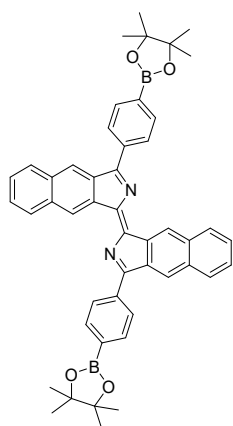

$^1H$  NMR (600 MHz,  $CDCl_3$ )  $\delta$  9.46 (s, 2H), 8.39 (d,  $J = 8.2$  Hz, 4H), 8.32 (s, 2H), 8.11 (d,  $J = 8.2$  Hz, 4H), 8.08 (d,  $J = 8.0$  Hz, 2H), 7.97 (d,  $J = 7.9$  Hz, 2H), 7.61 – 7.57 (m, 2H), 7.57 – 7.53 (m, 2H), 1.42 (s, 24H).  $^{13}C$  NMR (150 MHz,  $CDCl_3$ )  $\delta$  170.89, 148.64, 137.35, 137.05, 135.38, 135.34, 133.74, 133.16, 130.06, 129.94, 128.39, 127.95, 127.57, 127.01, 123.04, 84.22, 25.06. IR (thin film)  $\nu$  1473, 1519, 1608, 2928, 2977

cm<sup>-1</sup>. HRMS *m/z* (ESI) calcd for [C<sub>48</sub>H<sub>44</sub>B<sub>2</sub>N<sub>2</sub>O<sub>4</sub>Na] ([M+Na]<sup>+</sup>): 757.3395, found: 757.3397.

## SN<sub>2</sub> Substitution Reaction

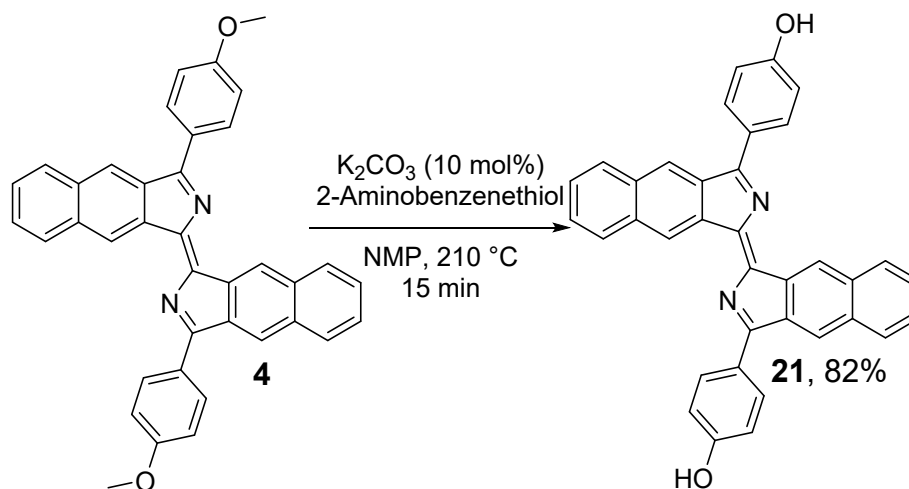

To an oven-dried Schlenk tube were charged with **4** (0.05 mmol, 27.1 mg), 2-Aminobenzenethiol (0.1 mmol, 12.5 mg), K<sub>2</sub>CO<sub>3</sub> (0.005 mmol, 0.7 mg) and NMP (1 mL). The tube was heated at 110 °C and stirred for 15 min. The solvent was removed under reduced pressure and the residue was purified by flash column chromatography on silica gel using DCM and CH<sub>3</sub>OH to give product **21** as a dark purple solid in 82% yield.

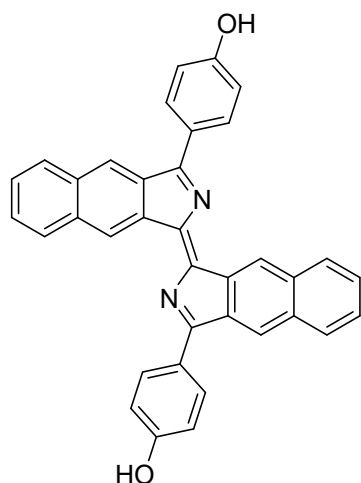

<sup>1</sup>H NMR (400 MHz, DMSO-*d*<sub>6</sub>) δ 10.40 (s, 2H), 9.49 (s, 2H), 8.81 (s, 2H), 8.54 (d, *J* = 8.6 Hz, 4H), 8.30 (d, *J* = 7.7 Hz, 2H), 8.26 (d, *J* = 7.7 Hz, 2H), 7.76 – 7.59 (m, 4H), 7.15 (d, *J* = 8.6 Hz, 4H). <sup>13</sup>C NMR (100 MHz, DMSO-*d*<sub>6</sub>) δ 168.55, 161.33, 146.95, 137.18, 135.00, 133.25, 131.65, 130.56, 130.05, 128.14, 127.48, 126.97, 125.68,

123.96, 116.61. IR (thin film)  $\nu$  1405, 1450, 1469, 1500, 1587, 1604, 1655, 3130  $\text{cm}^{-1}$ . HRMS  $m/z$  (ESI) calcd for  $[\text{C}_{36}\text{H}_{22}\text{N}_2\text{O}_2\text{H}]$  ( $[\text{M}+\text{H}]^+$ ): 515.1754, found:515.1749.

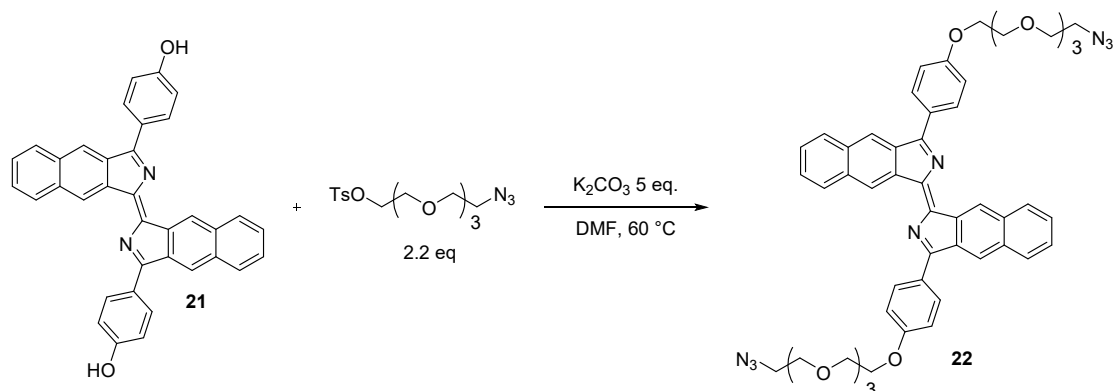

To an oven-dried Schlenk tube were charged with **21** (0.02 mmol, 10.3 mg), 2-(2-(2-(2-azidoethoxy)ethoxy)ethoxy)ethyl 4-methylbenzenesulfonate (0.044 mmol, 16.4 mg), K<sub>2</sub>CO<sub>3</sub> (0.1 mmol, 13.8 mg) and DMF (1 mL). The tube was heated at 60 °C and stirred for 12 h. The solvent was removed under reduced pressure and the residue was purified by flash column chromatography on silica gel using DCM and CH<sub>3</sub>OH to give product **22** as a dark purple solid in 85% yield.

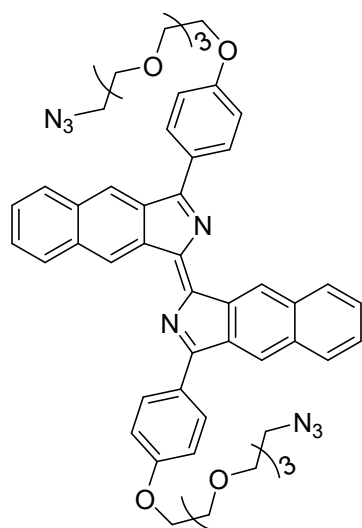

<sup>1</sup>H NMR (400 MHz, CDCl<sub>3</sub>)  $\delta$  9.45 (s, 1H), 8.41 (d,  $J = 8.7$  Hz, 2H), 8.35 (s, 1H), 8.11 (d,  $J = 7.9$  Hz, 1H), 7.98 (d,  $J = 7.8$  Hz, 1H), 7.62 – 7.52 (m, 2H), 7.20 (d,  $J = 8.6$  Hz, 2H), 4.31 (t,  $J = 4.8$  Hz, 2H), 4.01 – 3.93 (m, 2H), 3.83 – 3.78 (m, 2H), 3.77 – 3.67 (m, 8H), 3.40 (t,  $J = 5.0$  Hz, 2H). <sup>13</sup>C NMR (100 MHz, CDCl<sub>3</sub>)  $\delta$  169.16, 161.26, 147.73, 137.31, 135.34, 133.52, 132.97, 130.79, 129.91, 129.76, 127.90, 127.39, 127.22, 126.69, 122.74, 115.02, 70.96, 70.78, 70.75, 70.73, 70.09, 69.71, 67.64, 50.71. IR (thin

film)  $\nu$  1404, 1427, 1448, 1470, 1602, 2090, 2863, 2899  $\text{cm}^{-1}$ . HRMS  $m/z$  (ESI) calcd for  $[\text{C}_{52}\text{H}_{52}\text{N}_8\text{O}_8\text{H}]$  ( $[\text{M}+\text{H}]^+$ ): 917.3981, found: 917.3969.

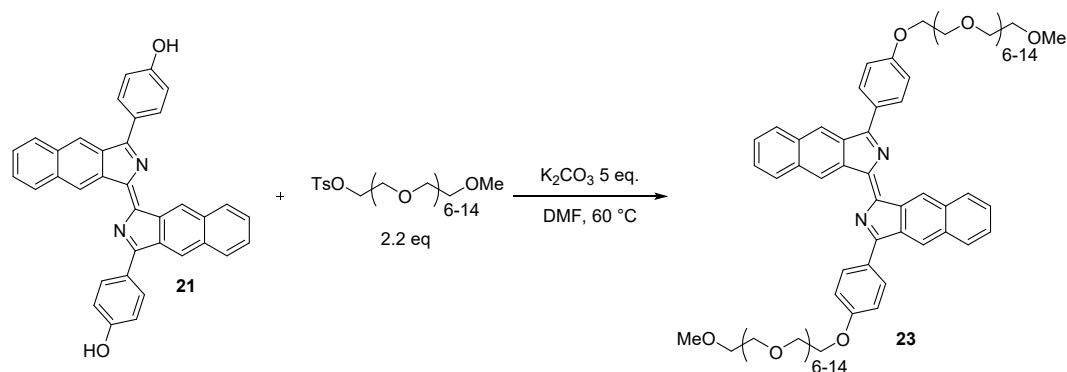

To an oven-dried Schlenk tube were charged with **20** (0.02 mmol, 10.3 mg), Ts-protected PEG monomethyl ether (0.044 mmol, 31.4 mg),  $\text{K}_2\text{CO}_3$  (0.1 mmol, 13.8 mg) and DMF (1 mL). The tube was heated at  $60\text{ }^\circ\text{C}$  and stirred for 12 h. The solvent was removed under reduced pressure and the residue was purified by flash column chromatography on silica gel using DCM and  $\text{CH}_3\text{OH}$  to give product **22** as a black solid in 65% yield.

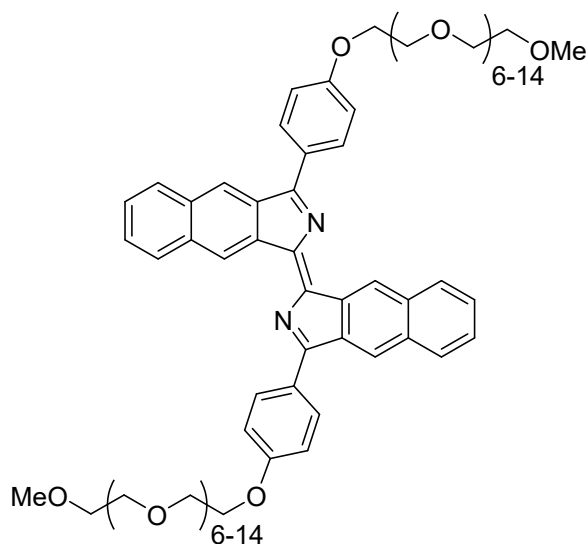

$^1\text{H}$  NMR (600 MHz,  $\text{CDCl}_3$ )  $\delta$  9.30 (s, 1H), 8.30 (d,  $J = 7.9$  Hz, 2H), 8.19 (s, 1H), 7.99 (d,  $J = 7.6$  Hz, 1H), 7.87 (d, 1H), 7.53 – 7.45 (m, 2H), 7.11 (d,  $J = 8.1$  Hz, 2H), 4.24 – 4.19 (m, 2H), 3.90 (t,  $J = 4.5$  Hz, 2H), 3.76 (t, 2H), 3.70 – 3.68 (m, 2H), 3.62 – 3.56 (m, 42H), 3.50 – 3.48 (m, 2H), 3.31 (s, 3H).  $^{13}\text{C}$  NMR (150 MHz,  $\text{CDCl}_3$ )  $\delta$  168.94, 161.24, 147.68, 137.31, 135.28, 133.47, 132.96, 130.82, 129.93, 129.80, 127.91, 127.38, 126.65, 122.71, 115.00, 71.94, 71.24, 70.95, 70.69, 70.57, 69.73, 67.65, 59.08. IR (thin film)  $\nu$  1407, 1451, 1472, 1603, 2870  $\text{cm}^{-1}$ .

# HRMS $m/z$ (ESI)

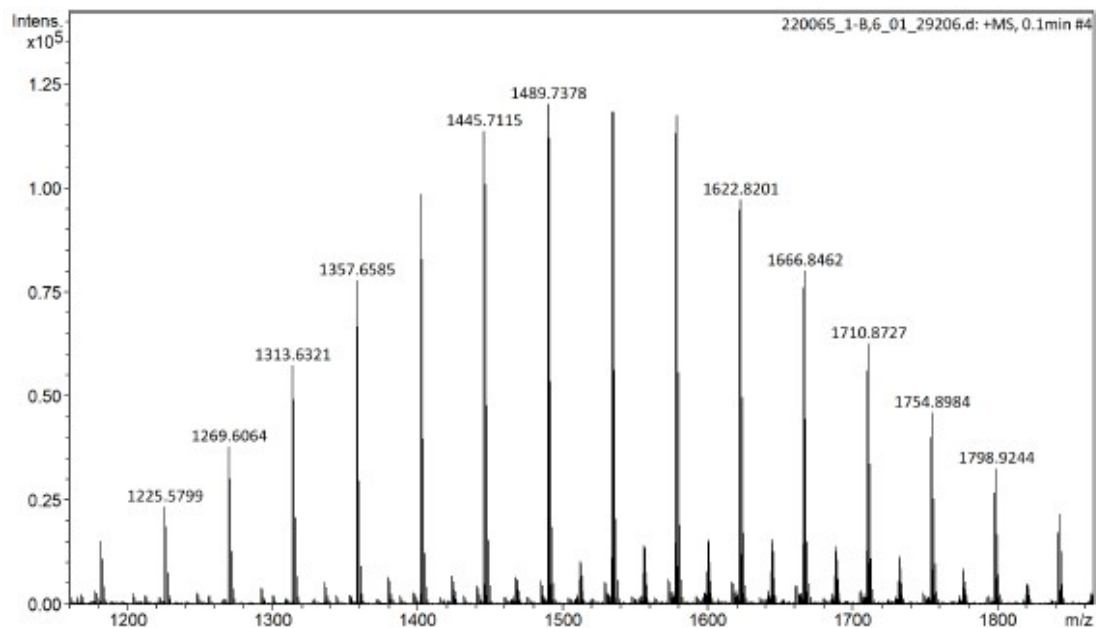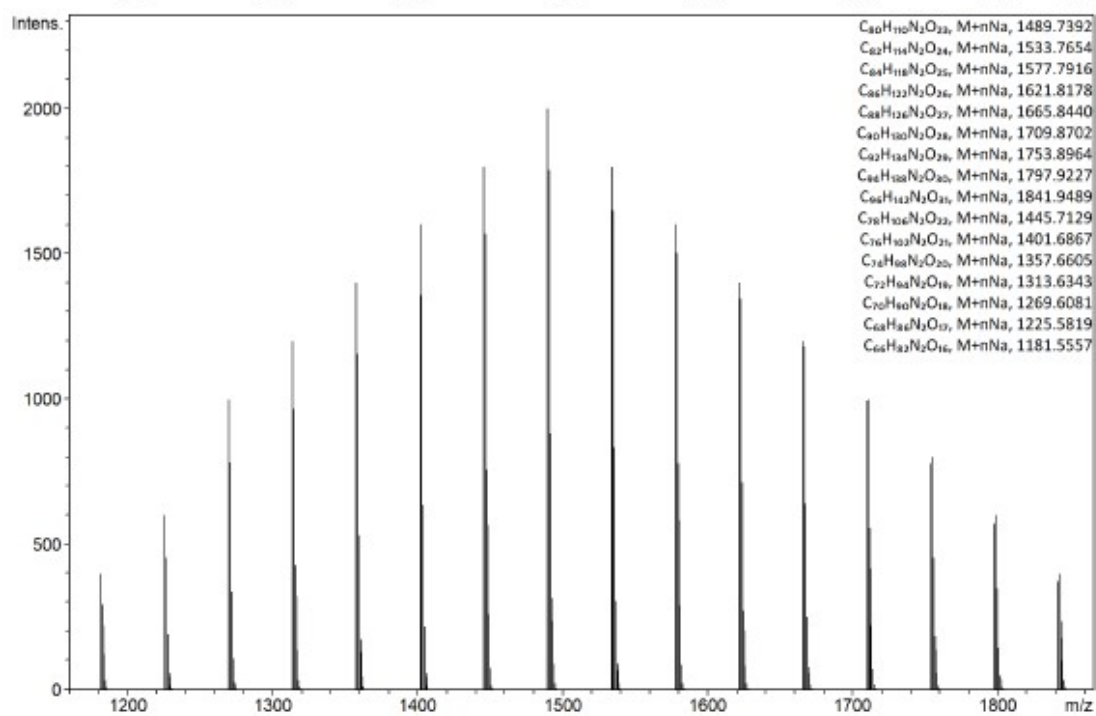

## Sonogashira Coupling

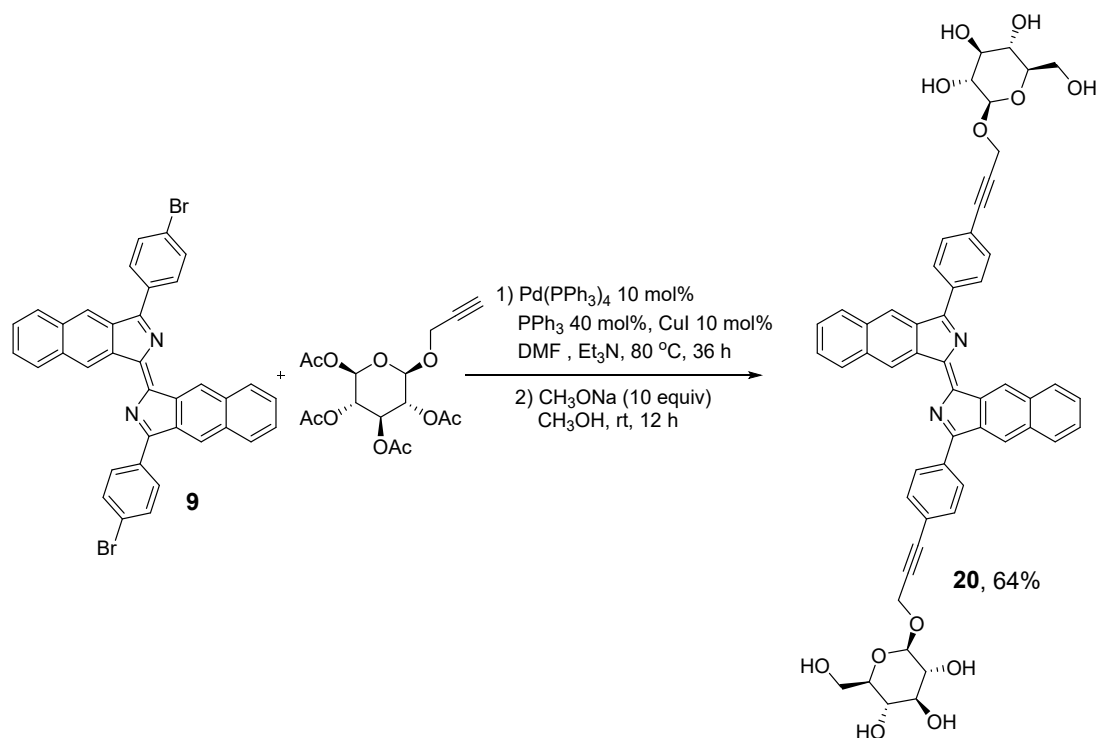

In a flame-dried Schlenk tube, **9** (32 mg, 0.05 mmol), 1-O-propargyl 2,3,4,6-tetra-O-acetyl- $\beta$ -D-glucose (58 mg, 0.15 mmol), PPh<sub>3</sub> (5.2 mg, 0.02 mmol), Pd(PPh<sub>3</sub>)<sub>4</sub> (5.8 mg, 0.02 mmol), CuI (1 mg, 0.005 mmol), triethylamine (0.5 mL, 0.15 mmol) and DMF (0.5 mL). The mixture was heated to 80 °C for 36 h under N<sub>2</sub> and stirring. The reaction mixture was concentrated under reduced pressure and the residue was purified by flash column chromatography on silica gel using methanol and dichloromethane to give desired product. The product was dissolved in anhydrous MeOH (1 mL) and sodium methoxide (0.5 mL, 30 wt% in methanol) was added. The reaction mixture stirred at room temperature for 12 h. Once the reaction was complete, the cationic resin was added to adjust the pH to neutral, the cationic resin was filtered off. Then washed the crude product with 5 mL DCM and 5 mL ethanol to give product **20** as a purple solid in 64% yield.

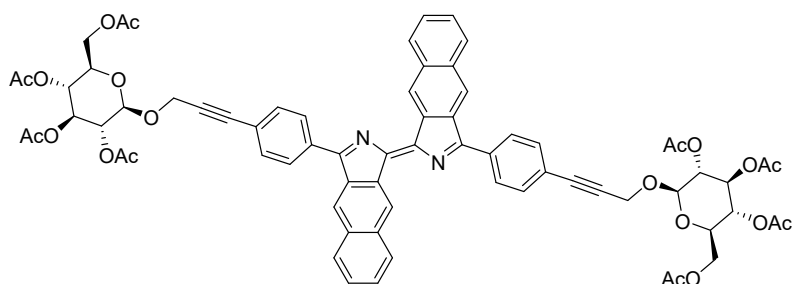

$^1\text{H}$  NMR (400 MHz,  $\text{CDCl}_3$ )  $\delta$  9.47 (s, 1H), 8.42 (d,  $J = 8.0$  Hz, 2H), 8.37 (s, 1H), 8.14 (d,  $J = 7.8$  Hz, 1H), 8.02 (d,  $J = 7.8$  Hz, 1H), 7.76 (d,  $J = 8.1$  Hz, 2H), 7.66 – 7.56 (m, 2H), 5.33 (t,  $J = 9.5$  Hz, 1H), 5.18 (t,  $J = 9.7$  Hz, 1H), 5.11 (dd,  $J = 9.5, 7.9$  Hz, 1H), 4.94 (d,  $J = 7.9$  Hz, 1H), 4.71 (s, 2H), 4.35 (dd,  $J = 12.3, 4.5$  Hz, 1H), 4.22 (dd,  $J = 12.3, 2.4$  Hz, 1H), 3.87 – 3.80 (m, 1H), 2.17 – 2.09 (m, 6H), 2.06 (s, 3H), 2.05 (s, 3H).  $^{13}\text{C}$  NMR (100 MHz,  $\text{CDCl}_3$ )  $\delta$  166.05, 165.65, 165.00, 164.83, 164.74, 143.81, 132.14, 130.23, 128.90, 128.34, 127.53, 125.27, 125.03, 124.36, 123.19, 122.93, 122.40, 120.05, 118.20, 93.80, 82.27, 81.30, 68.09, 67.26, 66.42, 63.57, 57.09, 52.29, 16.12, 16.07, 15.94, 15.91. IR (thin film)  $\nu$  1471, 1632, 1755, 2857, 2926 3056  $\text{cm}^{-1}$ . HRMS  $m/z$  (ESI) calcd for  $[\text{C}_{70}\text{H}_{62}\text{N}_2\text{O}_{20}\text{H}]$  ( $[\text{M}+\text{H}]^+$ ): 1251.3969, found: 1251.3965.

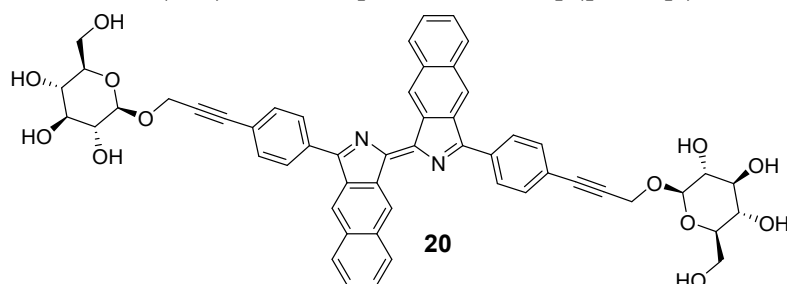

$^1\text{H}$  NMR (400 MHz,  $\text{DMSO-}d_6$ )  $\delta$  9.32 (s, 1H), 8.63 (s, 1H), 8.52 (d,  $J = 8.1$  Hz, 2H), 8.23 – 8.11 (m, 2H), 7.79 (d,  $J = 8.1$  Hz, 2H), 7.73 – 7.65 (m, 2H), 5.32 (d,  $J = 4.9$  Hz, 1H), 5.11 (d,  $J = 4.4$  Hz, 1H), 5.06 (d,  $J = 5.2$  Hz, 1H), 4.82 (d,  $J = 15.8$  Hz, 1H), 4.75 – 4.65 (m, 2H), 4.46 (d,  $J = 7.7$  Hz, 1H), 3.84 – 3.74 (m, 1H), 3.59 – 3.53 (m, 1H), 3.30 – 3.22 (m, 2H), 3.17 – 3.10 (m, 2H).  $^{13}\text{C}$  NMR (100 MHz,  $\text{DMSO-}d_6$ )  $\delta$  169.06, 148.00, 136.52, 134.43, 134.27, 133.28, 132.57, 130.66, 130.11, 129.75, 128.45, 127.79, 127.60, 125.22, 124.10, 101.73, 89.19, 85.94, 77.58, 77.18, 73.82, 70.55, 61.68, 56.31. IR (thin film)  $\nu$  1405, 1453, 1470, 1601, 2090, 2858, 2919, 3341  $\text{cm}^{-1}$ . HRMS  $m/z$  (ESI) calcd for  $[\text{C}_{54}\text{H}_{48}\text{N}_2\text{O}_{12}\text{H}]$  ( $[\text{M}+\text{H}]^+$ ): 915.3124, found: 915.3119.



## Click Reaction

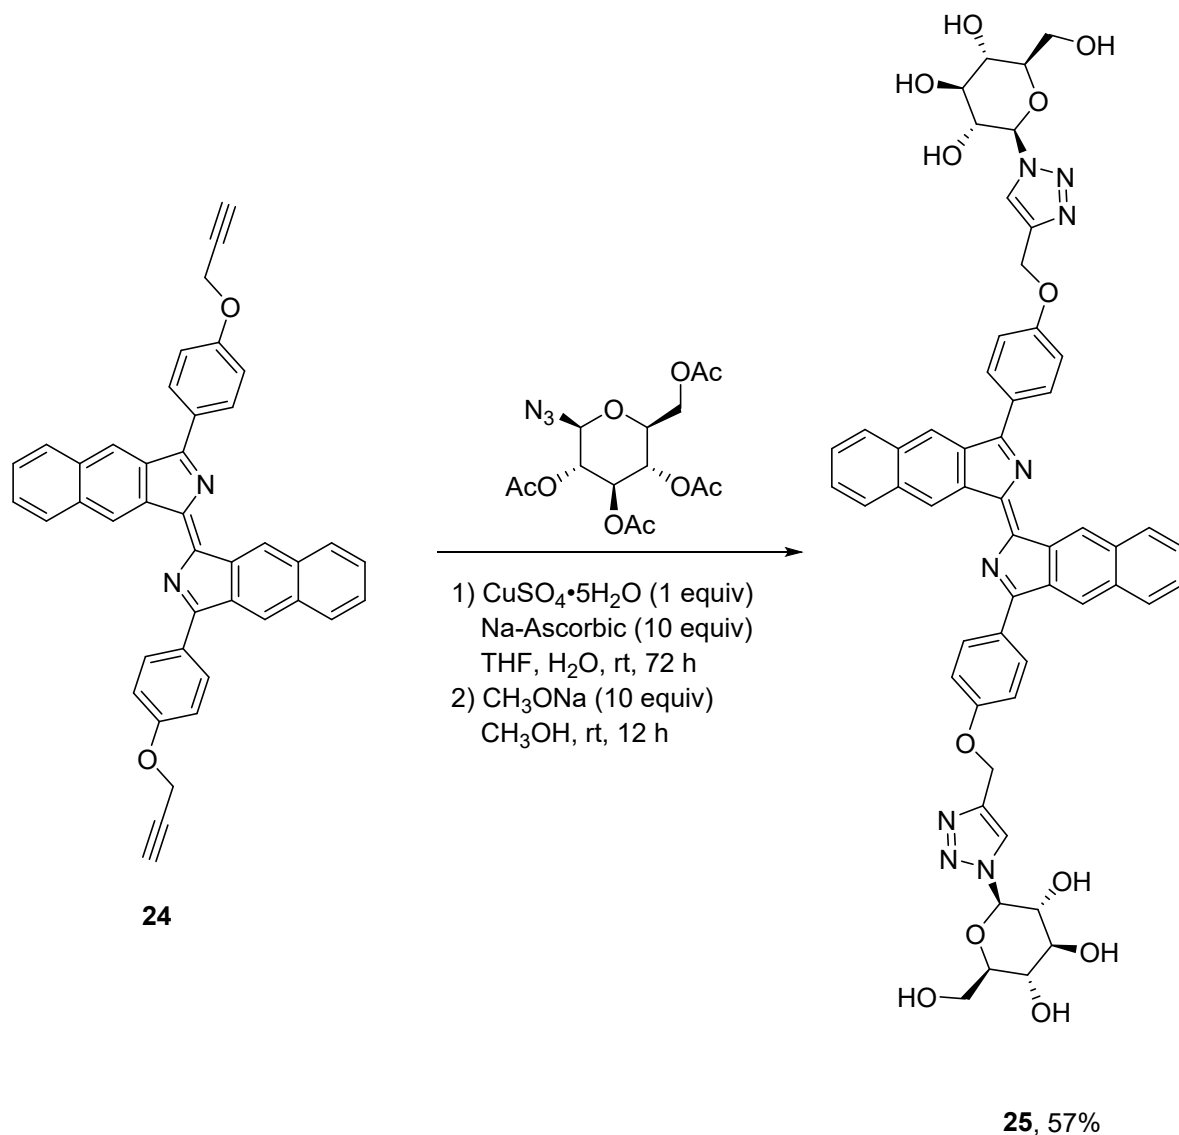

In a flame-dried Schlenk tube, **24** (29.5 mg, 0.05 mmol) and 1-azido-1-deoxy- $\beta$ -D-glucopyranoside tetraacetate (41.0 mg, 0.11 mmol) were dissolved in a mixture of THF: $\text{H}_2\text{O}$  (2 mL, 1:1), then copper sulfate pentahydrate (12.5 mg, 0.05 mmol) and sodium ascorbate (99.0 mg, 0.50 mmol) were added. The reaction mixture stirred at room temperature for 72 h. Once the reaction was complete, samples were extracted with DCM and dried over  $\text{MgSO}_4$ . The mixture was concentrated under reduced pressure and purified by column chromatography (1:10 methanol: dichloromethane). The product was dissolved in anhydrous MeOH (1 mL) and sodium methoxide (0.5 mL, 30 wt% in methanol) was added. The reaction mixture stirred at room temperature for 12 h. Once the reaction was complete, the cationic resin was added to adjust the pH to neutral, the cationic resin was filtered off. Then washed the crude product with 5 mL DCM and 5 mL ethanol to give product **25** as a purple solid in 57% yield.

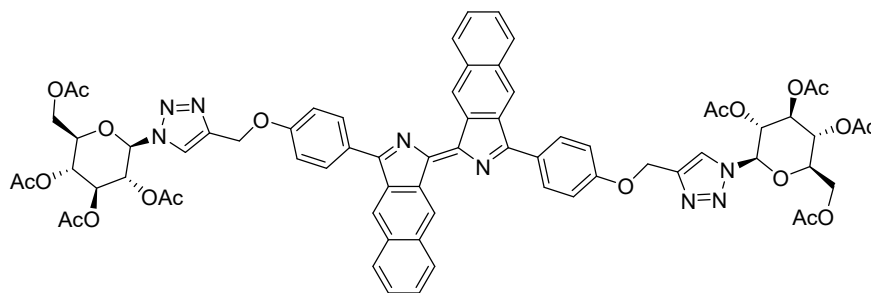

$^1\text{H}$  NMR (400 MHz,  $\text{CDCl}_3$ )  $\delta$  9.42 (s, 1H), 8.42 (d,  $J = 8.8$  Hz, 2H), 8.33 (s, 1H), 8.09 (d,  $J = 8.1$  Hz, 1H), 8.01 (s, 1H), 7.98 – 7.93 (m, 1H), 7.60 – 7.50 (m, 2H), 7.29 – 7.26 (m, 2H), 5.95 (d,  $J = 9.2$  Hz, 1H), 5.54 – 5.42 (m, 2H), 5.40 (s, 2H), 5.32 – 5.24 (m, 1H), 4.33 (dd,  $J = 12.7, 5.0$  Hz, 1H), 4.17 (dd,  $J = 12.7, 2.0$  Hz, 1H), 4.07 – 4.00 (m, 1H), 2.09 (s, 3H), 2.08 (s, 3H), 2.02 (s, 3H), 1.89 (s, 3H).  $^{13}\text{C}$  NMR (100 MHz,  $\text{CDCl}_3$ )  $\delta$  170.64, 170.04, 169.49, 169.16, 169.09, 160.48, 147.83, 144.74, 137.30, 135.31, 133.58, 133.03, 130.94, 129.98, 129.81, 128.45, 127.47, 127.33, 126.79, 121.54, 115.31, 85.93, 75.32, 72.72, 70.35, 67.74, 62.02, 61.61, 29.80, 20.82, 20.67, 20.63, 20.29. IR (thin film)  $\nu$  1473, 1603, 1755, 2938, 3059  $\text{cm}^{-1}$ . HRMS  $m/z$  (ESI) calcd for  $[\text{C}_{70}\text{H}_{64}\text{N}_8\text{O}_{20}\text{H}]$  ( $[\text{M}+\text{H}]^+$ ): 1337.4310, found: 1337.4313.

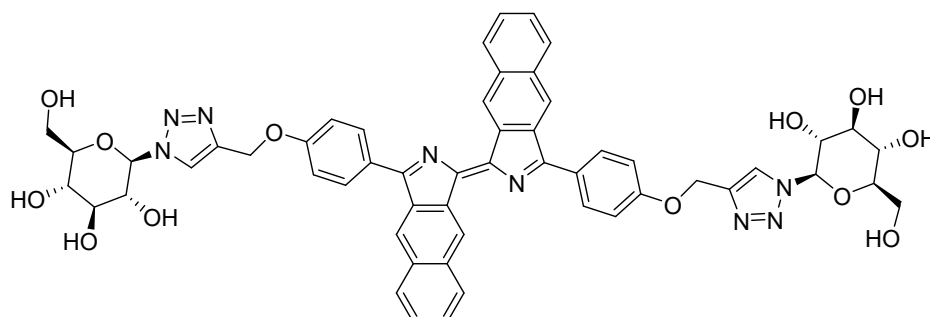

$^1\text{H}$  NMR (400 MHz,  $\text{DMSO}-d_6$ )  $\delta$  9.46 (s, 1H), 8.79 (s, 1H), 8.67 – 8.55 (m, 3H), 8.25 (d,  $J = 8.1$  Hz, 2H), 7.69 (p,  $J = 7.4, 7.0$  Hz, 2H), 7.43 (d,  $J = 8.8$  Hz, 2H), 5.62 (d,  $J = 9.3$  Hz, 1H), 5.48 (d,  $J = 6.0$  Hz, 1H), 5.40 (s, 2H), 5.35 (d,  $J = 4.9$  Hz, 1H), 5.21 (d,  $J = 5.5$  Hz, 1H), 4.69 (t,  $J = 5.5$  Hz, 1H), 3.88 – 3.79 (m, 1H), 3.76 – 3.68 (m, 1H), 3.51 – 3.40 (m, 3H), 3.30 – 3.22 (m, 1H).  $^{13}\text{C}$  NMR (150 MHz,  $\text{DMSO}-D_6$ )  $\delta$  168.77, 161.39, 147.33, 142.84, 137.08, 134.95, 133.38, 131.55, 130.71, 130.16, 128.38, 127.70, 127.49, 127.25, 124.78, 124.15, 115.94, 88.09, 80.54, 77.50, 72.63, 70.11, 61.86, 61.29. IR (thin film)  $\nu$  1405, 1426, 1435, 1470, 1601, 2850, 2918, 3326  $\text{cm}^{-1}$ . HRMS  $m/z$  (ESI) calcd for  $[\text{C}_{54}\text{H}_{49}\text{N}_8\text{O}_{12}\text{H}]$  ( $[\text{M}+\text{H}]^+$ ): 1001.3464, found: 1001.3459.

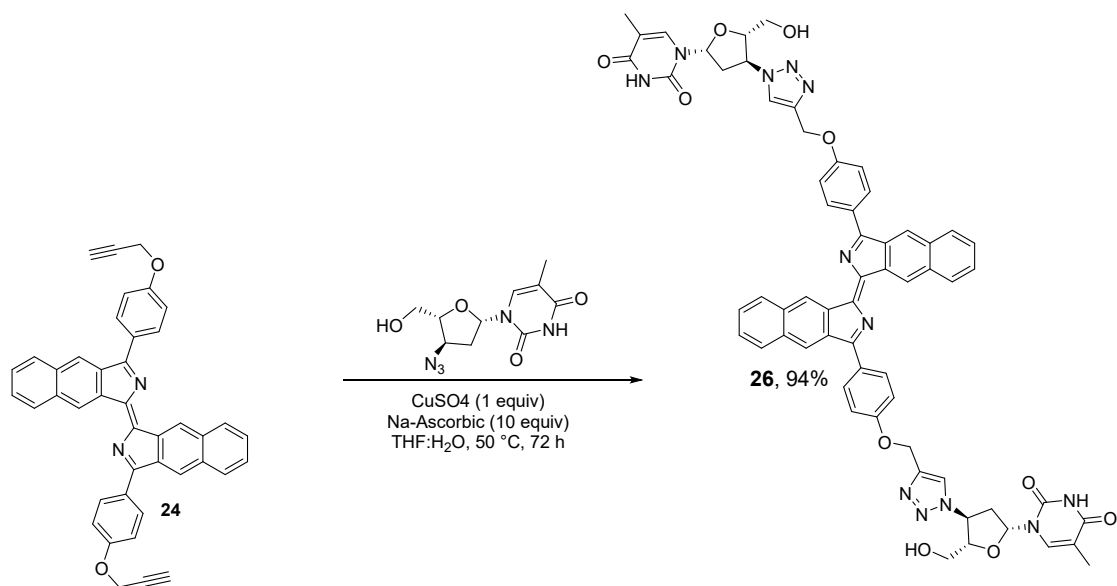

In a flame-dried Schlenk tube, **24** (29.5 mg, 0.05 mmol) and Zidovudine (66.8 mg, 0.25 mmol) were dissolved in a mixture of THF:H<sub>2</sub>O (2 mL, 2:1), then copper sulfate pentahydrate (12.5 mg, 0.05 mmol) and sodium ascorbate (99.0 mg, 0.50 mmol) were added. The reaction mixture stirred at 50 °C for 72 h. Once the reaction was complete, the reaction was quenched with DCM (5 mL). The suspension was filtered and the filter residue was washed with 5 mL water and 5 mL ethanol to get the crude product. The crude material was purified by silica gel flash chromatography using dichloromethane and methanol to give product **26** as a dark red solid in 94% yield.

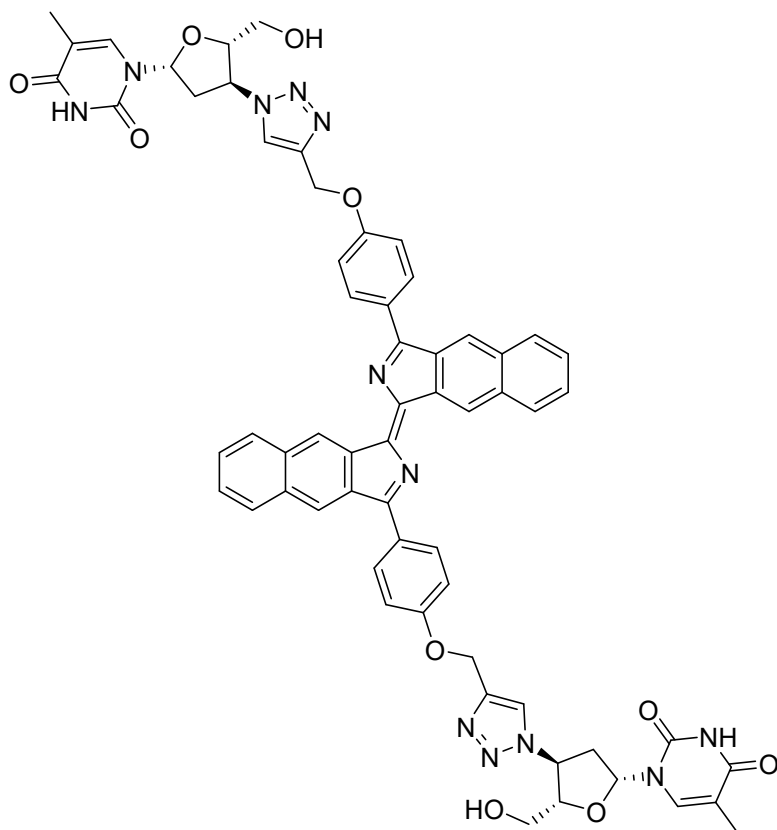

$^1\text{H}$  NMR (400 MHz,  $\text{DMSO-}d_6$ )  $\delta$  11.40 (s, 1H), 9.49 (s, 1H), 8.82 (s, 1H), 8.72 – 8.49 (m, 3H), 8.27 (s, 2H), 7.85 (s, 1H), 7.77 – 7.62 (m, 2H), 7.43 (d,  $J = 7.2$  Hz, 2H), 6.48 (t,  $J = 6.4$  Hz, 1H), 5.52 – 5.27 (m, 4H), 4.28 (m, 1H), 3.80 – 3.62 (m, 2H), 2.83 – 2.65 (m, 2H).  $^{13}\text{C}$  NMR (150 MHz,  $\text{DMSO-D}_6$ )  $\delta$  168.72, 164.28, 161.36, 151.00, 147.32, 143.21, 137.08, 136.79, 134.93, 133.36, 131.53, 130.68, 130.12, 128.35, 127.66, 127.51, 127.22, 125.13, 124.10, 115.93, 110.20, 85.01, 84.43, 61.95, 61.32, 59.95, 37.75, 12.83. IR (thin film)  $\nu$  1451, 1470, 1602, 1694, 2929, 3061  $\text{cm}^{-1}$ . HRMS  $m/z$  (ESI) calcd for  $[\text{C}_{62}\text{H}_{53}\text{N}_{12}\text{O}_{10}]$  ( $[\text{M}+\text{H}]^+$ ):1125.4002, found:1125.3995.

# Mechanism Study

## Cross-over Experiment

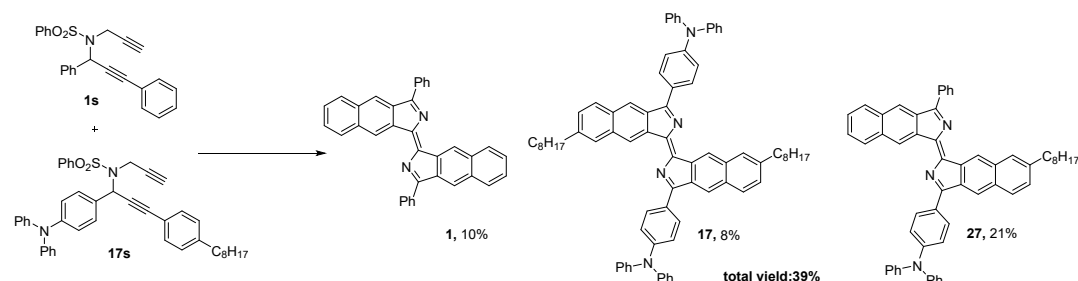

In a flame-dried Schlenk tube, **1s** (0.1 mmol, 1 equiv), **17s** (0.1 mmol, 1 equiv),  $K_2CO_3$  (0.6 mmol, 3 equiv) were dissolved in *i*-PrOH (1 mL) under open air conditions. The reaction mixture was stirred at 80 °C for 24 h. Upon completion of the reaction as monitored by TLC, the reaction was quenched with MeOH (5 mL). The suspension was filtered and the filter residue was washed with 5 mL of water and 5 mL of MeOH to get the crude product. The crude material was purified by flash chromatography on silica gel using petroleum ether and dichloromethane to yield the corresponding products **1**, **17**, **27** in 10%, 8%, 21% yield, respectively.

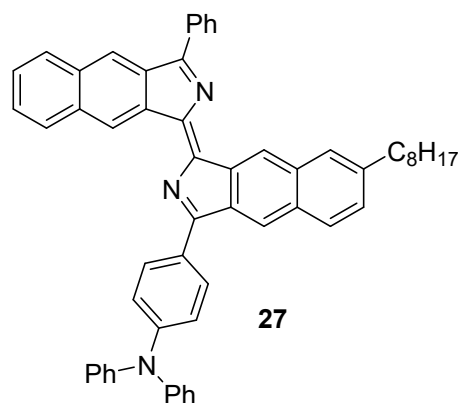

$^1H$  NMR (600 MHz,  $CDCl_3$ )  $\delta$  9.46 (s, 1H), 9.42 (s, 1H), 8.43 – 8.41 (m, 2H), 8.37 – 8.33 (m, 4H), 8.09 (d,  $J = 7.3$  Hz, 1H), 7.97 (d,  $J = 8.3$  Hz, 1H), 7.88 – 7.84 (m, 2H), 7.70 – 7.67 (m, 2H), 7.65 – 7.61 (m, 1H), 7.57 – 7.51 (m, 2H), 7.40 – 7.35 (m, 5H), 7.29 – 7.25 (m, 6H), 7.18 – 7.14 (m, 2H), 2.84 – 2.80 (m, 2H), 1.77 – 1.72 (m, 2H), 1.40 – 1.27 (m, 10H), 0.87 (t,  $J = 7.1$  Hz, 3H).  $^{13}C$  NMR (150 MHz,  $CDCl_3$ )  $\delta$  169.83, 169.57, 150.80, 149.01, 147.19, 147.05, 142.45, 137.52, 137.30, 135.31, 135.22, 134.86, 133.93, 133.65, 133.01, 131.60, 130.82, 130.46, 130.00, 129.83, 129.68, 129.20, 129.01, 128.59, 128.57, 127.88, 127.44, 127.36, 127.27, 126.71, 125.78, 124.31, 122.87, 122.68, 121.69, 36.38, 32.00, 31.50, 29.65, 29.52, 29.40, 22.78, 14.23.

IR (thin film)  $\nu$  1471, 1489, 1587, 2825, 2923, 2952  $\text{cm}^{-1}$ . HRMS  $m/z$  (ESI) calcd for  $[\text{C}_{56}\text{H}_{47}\text{N}_3\text{H}]$  ( $[\text{M}+\text{H}]^+$ ): 762.3843, found: 762.3846.

## Deuteration Experiments

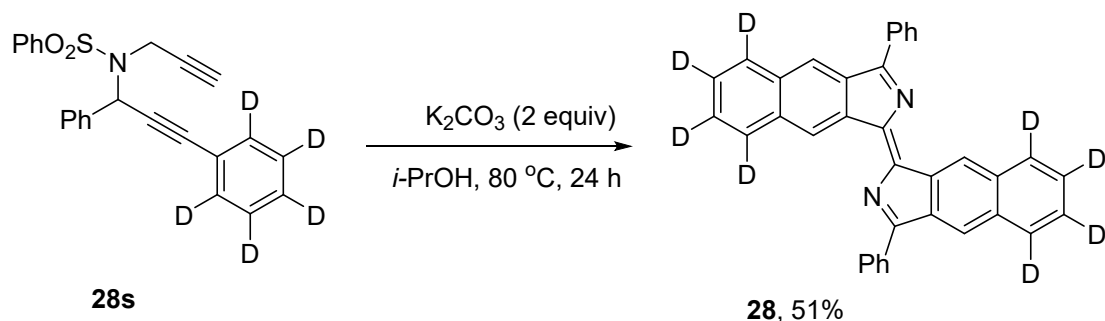

In a flame-dried Schlenk tube, deuterated propargyl sulfonamide **28s** (0.2 mmol, 1 equiv) and  $\text{K}_2\text{CO}_3$  (0.6 mmol, 3 equiv) were dissolved in *i*-PrOH (1 mL) under open air conditions. The reaction mixture was stirred at 80 °C for 24 h. Upon completion of the reaction as monitored by TLC, the reaction was quenched with MeOH (5 mL). The suspension was filtered and the filter residue was washed with 5 mL of water and 5 mL of MeOH to get the crude product. The crude material was purified by flash chromatography on silica gel using petroleum ether and dichloromethane to yield the deuterated product **28** in 51% yield.

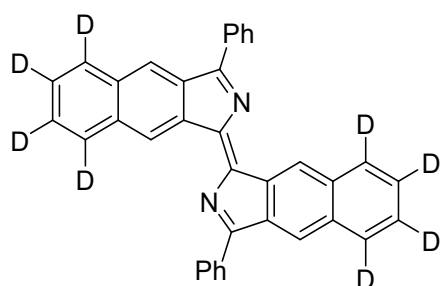

$^1\text{H}$  NMR (600 MHz,  $\text{CDCl}_3$ )  $\delta$  9.49 (s, 2H), 8.42 (d,  $J = 6.9$  Hz, 4H), 8.36 (s, 2H), 7.69 (t,  $J = 7.2$  Hz, 4H), 7.65 (t,  $J = 7.2$  Hz, 2H).  $^{13}\text{C}$  NMR (150 MHz,  $\text{CDCl}_3$ )  $\delta$  170.80, 148.39, 137.12, 135.37, 134.98, 133.66, 133.09, 131.13, 129.25, 129.07, 127.82, 122.96. IR (thin film)  $\nu$  1444, 1645, 1696, 2850, 2921  $\text{cm}^{-1}$ . HRMS (ESI) calcd for  $[\text{C}_{36}\text{H}_{14}\text{D}_8\text{N}_2\text{H}]$  ( $[\text{M}+\text{H}]^+$ ): 491.2358, found: 491.2356.

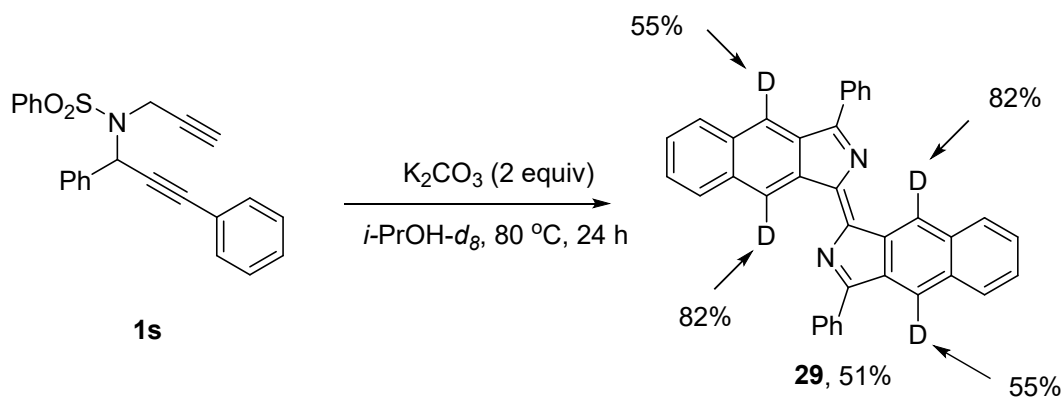

In a flame-dried Schlenk tube, propargyl sulfonamide **1s** (0.2 mmol, 1 equiv) and  $\text{K}_2\text{CO}_3$  (0.6 mmol, 3 equiv) were dissolved in *i*-PrOH- $d_8$  (1 mL) under open air conditions. The reaction mixture was stirred at 80 °C for 24 h. Upon completion of the reaction as monitored by TLC, the reaction was quenched with MeOH (5 mL). The suspension was filtered and the filter residue was washed with 5 mL of water and 5 mL of MeOH to get the crude product. The crude material was purified by flash chromatography on silica gel to yield the deuterated product **29** in 51% yield.

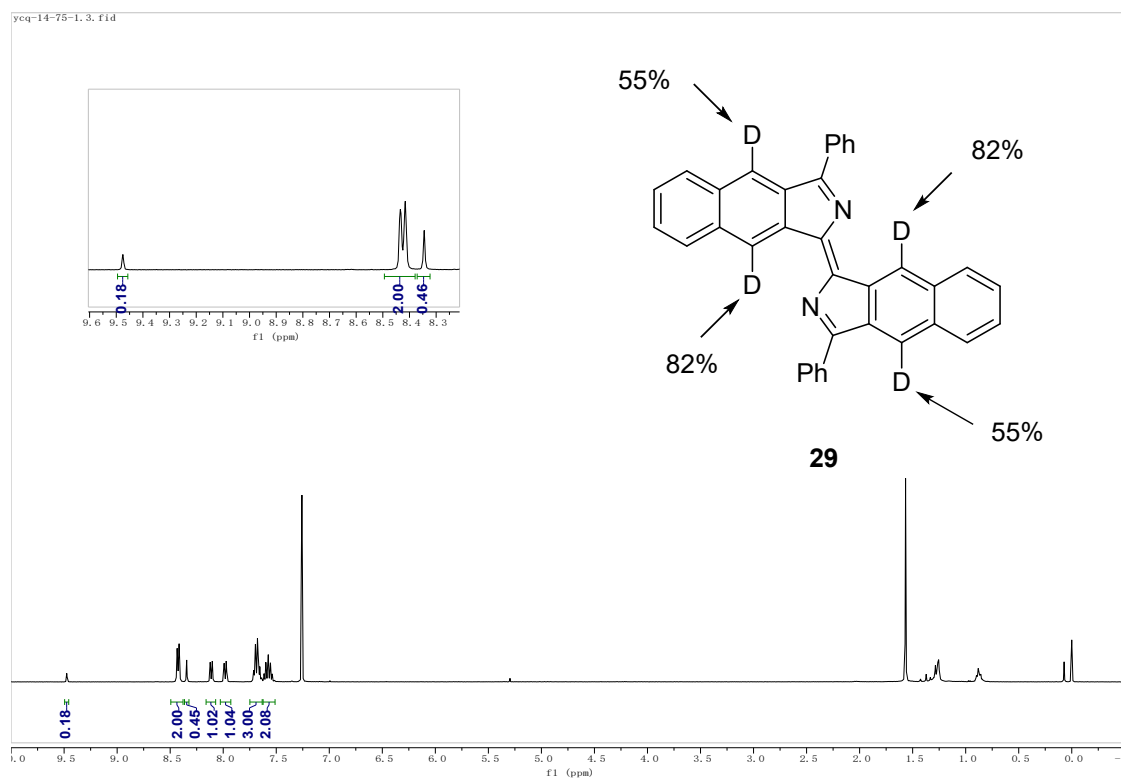

## Possible Intermediates

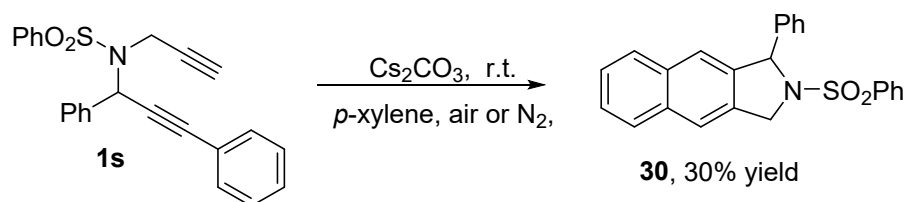

In a flame-dried Schlenk tube, **1s** (0.2 mmol, 1 equiv) and  $\text{Cs}_2\text{CO}_3$  (0.6 mmol, 3 equiv) were dissolved in *p*-xylene (1 mL) under open air conditions. The reaction mixture was stirred at room temperature for 24 h. On completion the reaction was quenched with saturated aqueous  $\text{NaHCO}_3$ . The aqueous layer was extracted with ethyl acetate and the combined organic layers were washed with brine, dried over  $\text{MgSO}_4$ , and filtered. Then the solution was concentrated under reduced pressure. The crude material was purified by flash chromatography on silica gel using petroleum ether and ethyl acetate to yield the possible intermediate **30** in 30% yield.

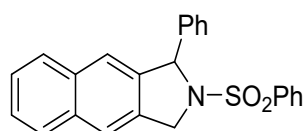

$^1\text{H}$  NMR (600 MHz,  $\text{CDCl}_3$ )  $\delta$  7.78 (d,  $J = 8.2$  Hz, 1H), 7.69 (s, 1H), 7.69 – 7.60 (m, 3H), 7.49 – 7.38 (m, 2H), 7.42 – 7.30 (m, 4H), 7.26 – 7.23 (m, 5H), 6.08 (s, 1H), 5.01 (d,  $J = 4.8$  Hz, 2H).  $^{13}\text{C}$  NMR (150 MHz,  $\text{CDCl}_3$ )  $\delta$  141.95, 140.03, 138.39, 133.93, 133.30, 133.26, 132.61, 128.95, 128.64, 128.08, 128.02, 127.83, 127.79, 127.37, 126.32, 126.11, 122.71, 121.16, 68.99, 53.52. IR (thin film)  $\nu$  1446, 1494, 1602, 2858, 2925, 3030, 3060  $\text{cm}^{-1}$ . HRMS  $m/z$  (ESI) calcd for  $[\text{C}_{24}\text{H}_{19}\text{NO}_2\text{SNa}]$  ( $[\text{M}+\text{Na}]^+$ ): 408.1029, found: 408.1027.

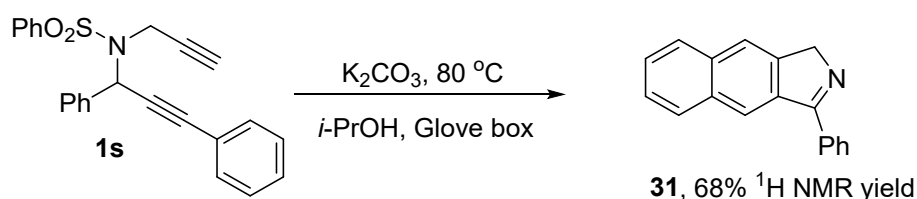

In a flame-dried Schlenk tube, **1s** (0.2 mmol, 1 equiv) and  $\text{K}_2\text{CO}_3$  (0.2 mmol, 2 equiv) were dissolved in *i*-PrOH (1 mL). The reaction mixture was stirred in glove box under 80 °C for 24 h. Then the solution was concentrated under reduced pressure. The yield of **31** was detected by  $^1\text{H}$  NMR in 68 % yield ( $\text{CH}_2\text{Br}_2$  as an internal standard). The crude material was purified by thin layer chromatography in glove box. These two reactions suggested that the compound **31** is more likely the intermediate rather than compound **30**.



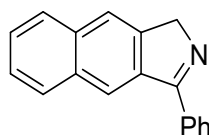

$^1\text{H}$  NMR (600 MHz,  $\text{CDCl}_3$ )  $\delta$  8.29 (s, 1H), 8.10 – 8.01 (m, 3H), 7.99 (d,  $J = 8.2$  Hz, 1H), 7.94 (d,  $J = 8.2$  Hz, 1H), 7.61 – 7.57 (m, 4H), 7.55 – 7.52 (m, 1H), 5.14 (s, 2H).  $^{13}\text{C}$  NMR (150 MHz,  $\text{CDCl}_3$ )  $\delta$  172.35, 146.57, 137.23, 134.91, 133.21, 132.73, 130.25, 129.37, 128.88, 128.33, 128.11, 127.26, 125.98, 121.98, 120.83, 63.91. HRMS  $m/z$  (ESI) calcd for  $[\text{C}_{18}\text{H}_{13}\text{NH}]$  ( $[\text{M}+\text{H}]^+$ ): 244.1121, found: 244.1121.

## Substituent Effect

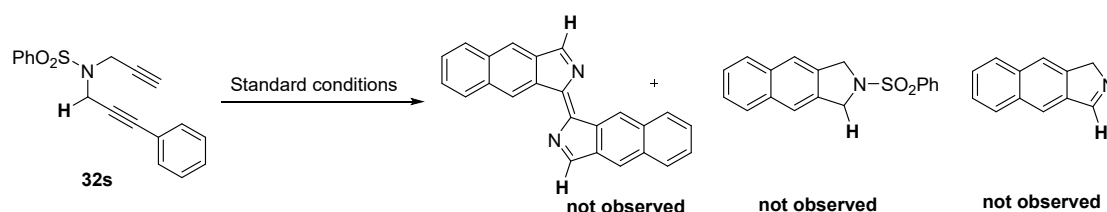

In a flame-dried Schlenk tube, **32s** (0.2 mmol, 1 equiv) and  $\text{K}_2\text{CO}_3$  (0.4 mmol, 2 equiv) were dissolved in *i*-PrOH (1 mL) under open air conditions. The reaction mixture was stirred at 80 °C for 24 h. The solution was filtrated with ethyl acetate on silica gel, and then detected by  $^1\text{H}$  NMR. no reaction occurs, and the starting material was left. This result indicates that the aryl group at  $\text{R}^1$  is essential for this reaction.

## Experiments with TEMPO

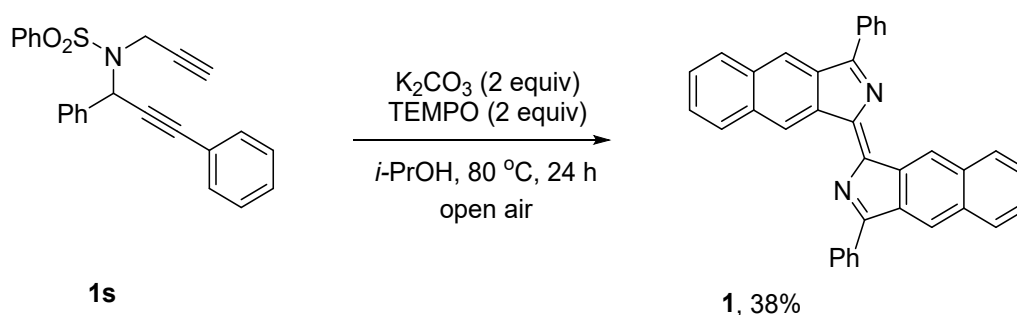

In a flame-dried Schlenk tube, **1s** (0.2 mmol, 1 equiv),  $\text{K}_2\text{CO}_3$  (0.4 mmol, 2 equiv), and TEMPO (0.4 mmol, 2 equiv) were dissolved in *i*-PrOH (1 mL) under open air conditions. The reaction mixture was stirred at 80 °C for 24 h. Upon completion of the reaction as monitored by TLC, the reaction was quenched with MeOH (5 mL). The suspension was filtered and the filter residue was washed with 5 mL of water and 5 mL of MeOH to get the crude product. The crude material was purified by flash

chromatography on silica gel using petroleum ether and dichloromethane to give the product **1** in 38% yield.

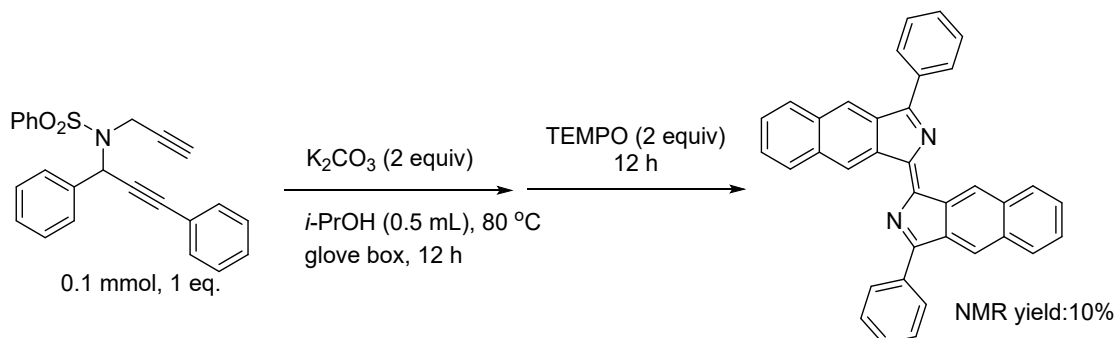

In a flame-dried Schlenk tube, **1s** (0.2 mmol, 1 equiv) and  $K_2CO_3$  (0.4 mmol, 2 equiv) were dissolved in *i*-PrOH (1 mL) in glove box. The reaction mixture was stirred at 80 °C for 12 h. Then TEMPO (0.4 mmol, 2 equiv) was added and the reaction continued for 12 h. The solution was filtrated, and the filtrate was concentrated under vacuum. 10 % yield of **1** was determined by  $^1H$  NMR analysis with  $CH_2Br_2$  as an internal standard.

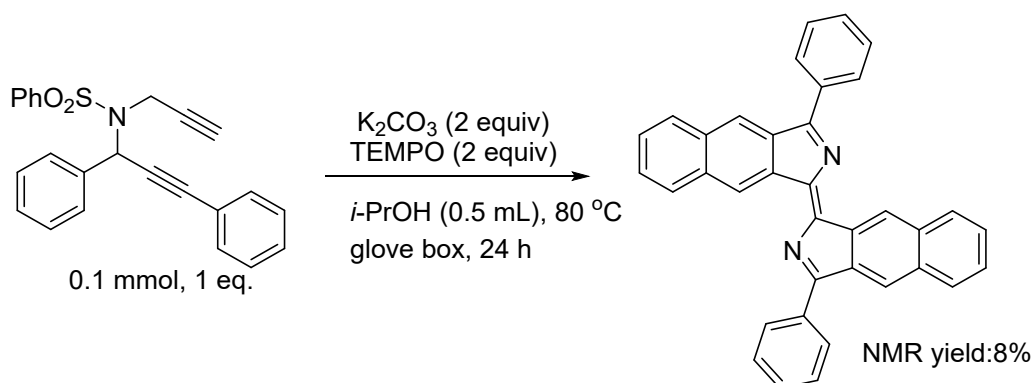

In a flame-dried Schlenk tube, **1s** (0.1 mmol, 1 equiv),  $K_2CO_3$  (0.2 mmol, 2 equiv), and TEMPO (0.2 mmol, 2 equiv) were dissolved in *i*-PrOH (0.5 mL) under open air conditions. The reaction mixture was stirred at 80 °C for 24 h. The solution was filtrated and the filtrate was concentrated under vacuum. 8 % yield of **1** was determined by  $^1H$  NMR analysis with  $CH_2Br_2$  as an internal standard.

## DFT Calculations

### Computation of electronic properties of compound 1, 6 and 8.

The geometrical optimizations and the absorption energy calculations were performed by DFT and TD-DFT methods at the B3LYP-D3/Def2-SVP level of theory with SMD solvation model in solvent THF; in addition, the external iteration for the self-consistent PCM calculations were carried out for the excited states calculations in which the non-equilibrium solvent field was read from the optimized ground states.

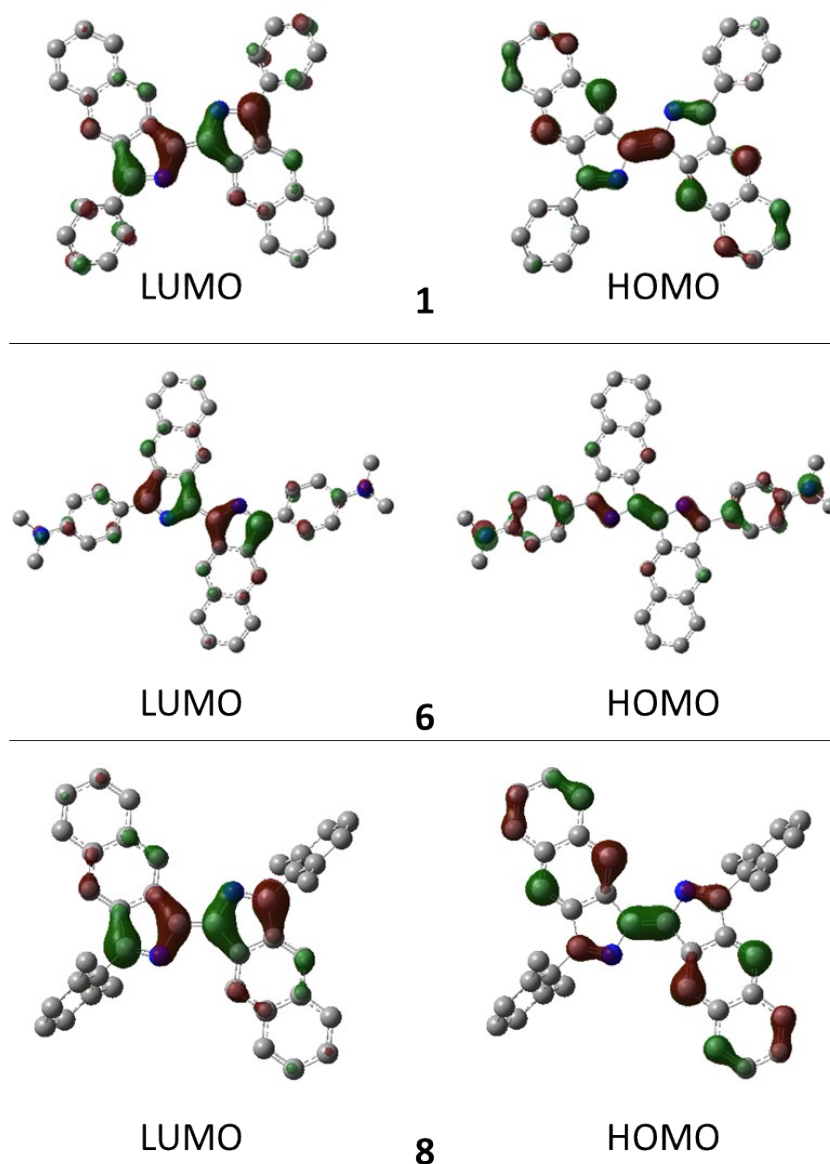

**Figure S1.** Electronic density contours of the HOMO and LUMO for selected examples at isovalue of 0.04.

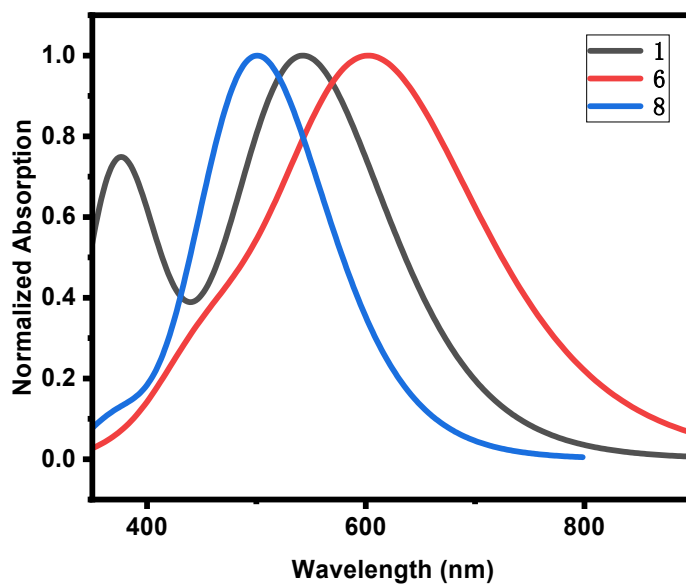

**Figure S2.** UV-*vis* spectra of **1**, **6** and **8** by TD-DFT method.

**Table S2.** Calculated data for absorption spectrum.

| Compound | $\lambda_{\text{abs,max,exp}}$<br>(nm) | $\lambda_{\text{abs,max,calc}}$<br>(nm) | $E_{\text{gap, opt, calc}}$<br>(eV) | oscillator<br>strength |
|----------|----------------------------------------|-----------------------------------------|-------------------------------------|------------------------|
| <b>1</b> | 535                                    | 543.6                                   | 2.28                                | 0.82                   |
| <b>6</b> | 590                                    | 608.7                                   | 2.04                                | 1.27                   |
| <b>8</b> | 499                                    | 501.1                                   | 2.47                                | 0.84                   |

**Table S3.** NTO analysis.

| Compound | $S_0 \rightarrow S_1$ , HOMO $\rightarrow$ LUMO<br>Transition coefficient |
|----------|---------------------------------------------------------------------------|
| <b>1</b> | 1.0                                                                       |
| <b>6</b> | 1.0                                                                       |
| <b>8</b> | 1.0                                                                       |

## Computation of reaction mechanism

**Computational methods:** Density functional theory (DFT) computational studies were carried out at B3LYP<sup>1</sup>-D3<sup>2</sup>(SMD<sup>3</sup>)/Def2-TZVP<sup>4</sup>//B3LYP-D3/Def2-SVP level of theory, in which the D3 dispersion correction is the original D3 damping function. The integration grid option was required at ultrafine for all of calculations. All of structures were optimized in gas-phase with thermal calculations and frequency analyses at 353 K. Transition state structures were searched by simply performing a crude relaxed potential energy surface (RPES) scan connecting reactants and products, and then optimized by the rational function optimization (RFO) method of TS.<sup>5</sup> Imaginary frequencies for all of transition states were verified to be the only one in their vibrations and were confirmed the correctness by viewing the normal mode vector or the intrinsic reaction coordinate (IRC)<sup>6</sup> path calculations. The reported Gibbs free energies were the single point electronic energy in 2-Propanol with the gas-phase free energy correction. All calculations were performed by the Gaussian 09 package.<sup>7</sup>

## Discussion on the cyclization step through ionic, radical and diradical pathways

Since compound **1s** is activated by addition of a Lewis base, **int1**, a diallenyl benzenesulfonamide intermediate with a relative free energy of -14.1 kcal/mol, was initially thought, based upon the deuteration experiments to cyclize with or without assistance from a potassium ion. The cyclization pathway with potassium assistance is found to be the favorable pathway. **Int2**, combination of **int1** with the potassium ion, turns out to be the most stable species with -22.2 kcal/mol of relative free energy due to the stabilization energy of coordination. The transition state of cyclization, **TS1**, is then located with a barrier of 24.2 kcal/mol leading to the **int3** with a free energy of -55.0 kcal/mol. It is noteworthy that here is a concerted pathway corresponding to the formations of two C-C bonds from **int2** to **int3**. The intrinsic reaction coordinate (IRC) calculation has been conducted to confirm this (Fig. S4). The pathway of neutral species from **int1** without the potassium assistance has also been calculated. However, the free energies of cyclization and benzenesulfonyl migration steps are higher than that through the pathway with the potassium assistance, indicating that the alkaline condition may promote the reaction.

To distinguish the most favorable pathway, radical pathway from **int1** has also been considered. The radical pathway from **int1** homolysis to benzenesulfonyl and diallenylamino radicals (**int6**) has been calculated as well as the cyclization from radical **int6**, but the free energies are much higher, implying that the radical pathway is disfavored. This result is in agreement with the experiment with TEMPO under standard conditions. It is worth to note that the transition state of directly homolytic

cleavage of N-S bond in **int1** cannot be located; however, separated benzenesulfonyl radical ( $\bullet\text{SO}_2\text{Ph}$ ) and diallenylamino radicals (**int6**) have still been calculated for investigation of the radical cyclization process. The relative free enthalpy of separated  $\text{SO}_2\text{Ph}$  radical with **int6** is 9.1 kcal/mol, much higher than that of **int1**, indicating that homolysis of **int1** to deliver the diallenylamino radical is thermodynamically disfavored. The cyclization TS of C-C coupling, **TS4**, with 17.5 kcal/mol free enthalpy is subsequently located. However, unlike the concerted **TS1**, a stepwise intermediate **int7** can be found which then through the second C-C coupling transition state, **TS5**, with barrier of 27.5 kcal/mol to form **int8**. The relative free energies of radical cyclization process seem thermodynamically disfavored; in addition, the reaction is almost unaffected by TEMPO suggesting that the reaction may not occur through a radical pathway.

On the other hand, biradical intermediates with and without potassium ion attached, **int9** and **int9'**, can be located by using unrestricted self-consistent field (SCF) method with mixed HOMO and LUMO wavefunctions as initial guess functions for the open-shell singlet calculations. These intermediates then cyclize via the TSs of **TS6** and **TS6'** with barriers of 13.0 and 13.9 kcal/mol, respectively, to result in **int3** and **int3'**. Although the biradical intermediates can be calculated on the open-shell singlet state, the spin expectation values of  $\langle S^2 \rangle$  are large (1.01 and 0.95 for **int9** and **int9'**, respectively) implying that the open-shell singlet state brings a serious spin contamination problem, and the biradical intermediates may be the artificial errors. Besides, the TEMPO-adduct on the terminal carbons of propargyl groups should be observed if these biradical stationary points are the reasonable existent.

Finally, the elimination of the benzenesulfonyl group from **int3** was investigated. No transition state for the direct benzenesulfonyl elimination was found, but the transition state (**TS2**) of the benzenesulfonyl migration with a barrier of 24.3 kcal/mol, was found to lead to **int4**. The benzenesulfonyl group in **int4** then can abstract the terminal hydrogen of the propargyl group, forming  $\text{HSO}_2\text{Ph}$  with **int5**, from the transition state (**TS3**).

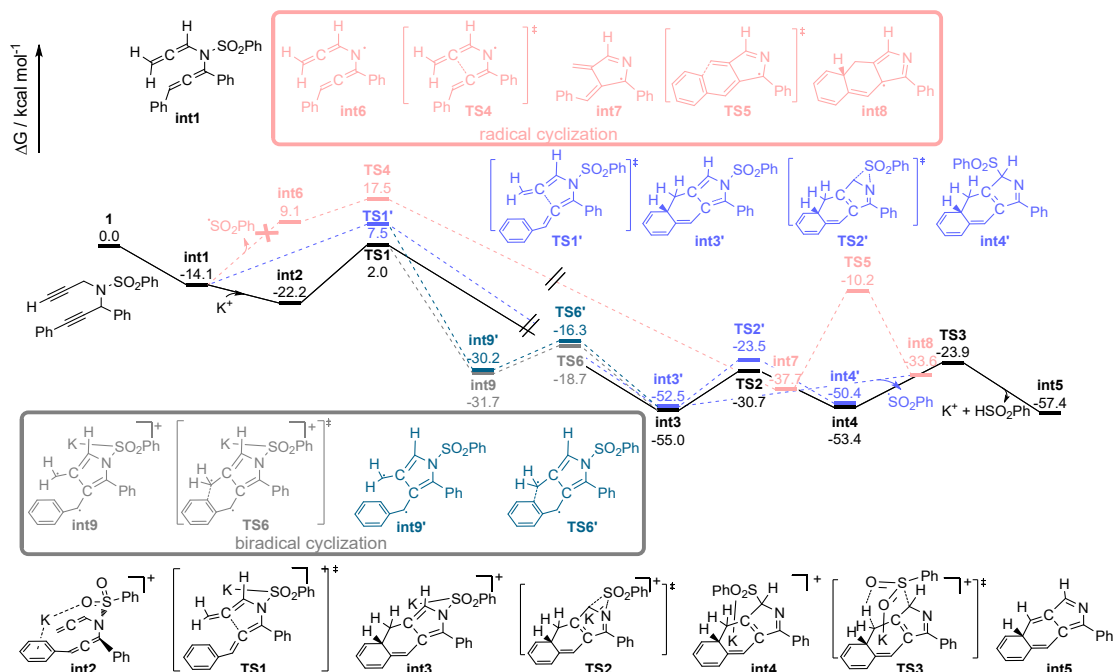

**Figure S3.** Free energy profile of reaction pathways corresponding to cation, neutral species and radical cyclization process.

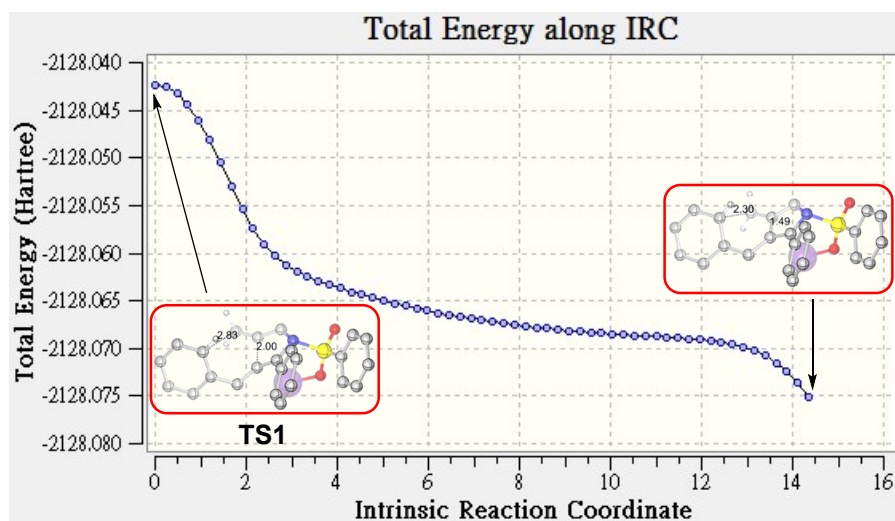

**Figure S4.** IRC path from TS1 toward to int3. No stationary point (local minimum point) exists in this path.

**Table S4.** Electronic potential energies and correction to zero point energies, thermal energies, enthalpies, free energies (in Hartree) and imaginary frequencies ( $\text{cm}^{-1}$ ) of optimized structures calculated at the B3LYP-D3/Def2-TZVP/(SMD- 2-Propanol)/B3LYP-D3/Def2-SVP.

| Entry | Structure                              | $E_{\text{el,sol}}$ | $E_{\text{el,gas}}$ | $\text{cZPE}_{\text{gas}}$ | $\text{cU}_{353,\text{gas}}$ | $\text{cH}_{353,\text{gas}}$ | $\text{cG}_{353,\text{gas}}$ | Imaginary Frequency |
|-------|----------------------------------------|---------------------|---------------------|----------------------------|------------------------------|------------------------------|------------------------------|---------------------|
| 1     | <b>1s</b>                              | -1529.751289        | -1528.296532        | 0.365494                   | 0.399215                     | 0.400334                     | 0.290638                     |                     |
| 2     | <b>int1</b>                            | -1529.772273        | -1528.319077        | 0.364260                   | 0.398018                     | 0.399137                     | 0.289075                     |                     |
| 3     | <b>K<sup>+</sup></b>                   | -599.849383         | -599.682772         | 0.000000                   | 0.001678                     | 0.002796                     | -0.018449                    |                     |
| 4     | <b>int2</b>                            | -2129.650076        | -2128.074121        | 0.364893                   | 0.401330                     | 0.402448                     | 0.286145                     |                     |
| 5     | <b>TS1</b>                             | -2129.615783        | -2128.042386        | 0.364460                   | 0.399283                     | 0.400401                     | 0.290531                     | -441.4025           |
| 6     | <b>int3</b>                            | -2129.715077        | -2128.146136        | 0.370866                   | 0.404343                     | 0.405461                     | 0.298879                     |                     |
| 7     | <b>TS2</b>                             | -2129.672318        | -2128.106760        | 0.368095                   | 0.401647                     | 0.402765                     | 0.294804                     | -171.8287           |
| 8     | <b>int4</b>                            | -2129.709617        | -2128.144442        | 0.370375                   | 0.404038                     | 0.405156                     | 0.296024                     |                     |
| 9     | <b>TS3</b>                             | -2129.655670        | -2128.105583        | 0.363262                   | 0.397166                     | 0.398284                     | 0.289150                     | -652.1045           |
| 10    | <b>K<sup>+</sup>+HSO<sub>2</sub>Ph</b> | -1380.942036        | -1380.188070        | 0.110481                   | 0.124108                     | 0.125227                     | 0.062718                     |                     |
| 11    | <b>int5</b>                            | -748.743864         | -747.921837         | 0.255190                   | 0.274388                     | 0.275507                     | 0.203243                     |                     |
| 12    | <b>35</b>                              | -748.819974         | -747.999252         | 0.257395                   | 0.276231                     | 0.277349                     | 0.205978                     |                     |
| 13    | <b>TS1'</b>                            | -1529.741232        | -1528.290604        | 0.363336                   | 0.395687                     | 0.396805                     | 0.292574                     | -511.6211           |
| 14    | <b>int3'</b>                           | -1529.847576        | -1528.404308        | 0.370556                   | 0.401210                     | 0.402328                     | 0.303248                     |                     |
| 15    | <b>TS2'</b>                            | -1529.798661        | -1528.354976        | 0.367769                   | 0.398454                     | 0.399572                     | 0.300575                     | -177.6683           |
| 16    | <b>int4'</b>                           | -1529.842893        | -1528.394473        | 0.369827                   | 0.400590                     | 0.401709                     | 0.301944                     |                     |
| 17    | <b>SO<sub>2</sub>Ph</b>                | -780.436090         | -779.809793         | 0.098653                   | 0.108884                     | 0.110002                     | 0.057057                     |                     |
| 18    | <b>int6</b>                            | -749.267057         | -748.441985         | 0.259511                   | 0.282124                     | 0.283243                     | 0.199973                     |                     |
| 19    | <b>TS4</b>                             | -749.255964         | -748.431095         | 0.259320                   | 0.280859                     | 0.281978                     | 0.202170                     | -505.8355           |
| 20    | <b>int7</b>                            | -749.350143         | -748.528394         | 0.264135                   | 0.284895                     | 0.286013                     | 0.208494                     |                     |
| 21    | <b>TS5</b>                             | -749.307529         | -748.484113         | 0.263110                   | 0.282917                     | 0.284036                     | 0.209720                     | -588.8237           |
| 22    | <b>int8</b>                            | -749.348026         | -748.524941         | 0.265974                   | 0.285579                     | 0.286697                     | 0.212799                     |                     |
| 23    | <b>int9</b>                            | -2129.670316        | -2128.100700        | 0.365819                   | 0.400896                     | 0.402015                     | 0.291295                     |                     |
| 24    | <b>TS6</b>                             | -2129.650950        | -2128.080335        | 0.365286                   | 0.399315                     | 0.400434                     | 0.292684                     | -544.5143           |
| 25    | <b>int9'</b>                           | -1529.804202        | -1528.360651        | 0.365478                   | 0.397711                     | 0.398830                     | 0.295498                     |                     |
| 26    | <b>TS6'</b>                            | -1529.783134        | -1528.338256        | 0.364794                   | 0.396030                     | 0.397148                     | 0.296573                     | -532.3474           |



## Coordinate of optimized structures

### Structure S1. 1s

E(RB3LYP)<sub>sol</sub> = -1529.75128876 E(RB3LYP)<sub>gas</sub> = -1528.29653221

-----

|    |           |           |           |
|----|-----------|-----------|-----------|
| 6  | 1.582840  | -0.199655 | 1.033522  |
| 6  | 2.746260  | -0.034647 | 0.728253  |
| 6  | 4.068349  | 0.189107  | 0.230363  |
| 7  | -0.401943 | -1.388369 | 0.265266  |
| 6  | -0.080667 | -2.805143 | 0.464695  |
| 6  | -0.885347 | -3.392727 | 1.540473  |
| 6  | -1.550932 | -3.858851 | 2.438882  |
| 1  | -2.139149 | -4.282775 | 3.231214  |
| 6  | 5.196490  | 0.185964  | 1.074330  |
| 6  | 6.468333  | 0.409220  | 0.544964  |
| 6  | 6.632114  | 0.635355  | -0.826120 |
| 6  | 5.515905  | 0.638995  | -1.671186 |
| 6  | 4.240441  | 0.419187  | -1.152127 |
| 16 | -0.662032 | -0.834385 | -1.321645 |
| 8  | 0.257000  | 0.267864  | -1.619784 |
| 8  | -0.706287 | -2.033660 | -2.165280 |
| 6  | -2.323417 | -0.159661 | -1.254350 |
| 6  | -2.523475 | 1.189645  | -1.539533 |
| 6  | -3.824133 | 1.699924  | -1.490471 |
| 6  | -4.895089 | 0.863589  | -1.165776 |
| 6  | -4.675141 | -0.492915 | -0.890626 |
| 6  | -3.383075 | -1.015142 | -0.936904 |
| 1  | 0.996166  | -2.924327 | 0.688912  |
| 1  | -0.265006 | -3.336951 | -0.479536 |
| 1  | 5.064364  | 0.008071  | 2.143729  |
| 1  | 7.338423  | 0.406049  | 1.206471  |
| 1  | 7.630204  | 0.808748  | -1.236487 |
| 1  | 5.640935  | 0.815103  | -2.742635 |
| 1  | 3.358685  | 0.419824  | -1.797314 |
| 1  | -1.667625 | 1.823982  | -1.770725 |
| 1  | -3.996110 | 2.758515  | -1.697933 |
| 1  | -5.909317 | 1.268566  | -1.124019 |
| 1  | -5.515046 | -1.144946 | -0.638947 |
| 1  | -3.193739 | -2.067826 | -0.717978 |
| 6  | 0.155667  | -0.448707 | 1.269785  |
| 1  | 0.053130  | -0.993118 | 2.224544  |
| 6  | -0.705955 | 0.806667  | 1.400540  |
| 6  | -2.006942 | 0.664288  | 1.905727  |
| 6  | -0.257464 | 2.068697  | 1.001437  |
| 6  | -2.849431 | 1.770318  | 2.009895  |
| 1  | -2.362737 | -0.328480 | 2.194089  |

|   |           |          |          |
|---|-----------|----------|----------|
| 6 | -1.101305 | 3.179398 | 1.109282 |
| 1 | 0.746876  | 2.173831 | 0.588761 |
| 6 | -2.396562 | 3.033742 | 1.611779 |
| 1 | -3.864610 | 1.646829 | 2.394669 |
| 1 | -0.743607 | 4.162333 | 0.792164 |
| 1 | -3.056223 | 3.901784 | 1.689980 |

### Structure S2. int1

E(RB3LYP)<sub>sol</sub> = -1529.77227319 E(RB3LYP)<sub>gas</sub> = -1528.31907736

-----

|    |           |           |           |
|----|-----------|-----------|-----------|
| 6  | 1.334028  | -0.108812 | -0.767541 |
| 6  | 2.444214  | -0.376399 | -1.414591 |
| 6  | 3.810631  | -0.202079 | -0.883179 |
| 7  | -0.331383 | -0.960313 | 0.663389  |
| 6  | -0.060355 | -1.128103 | 2.039425  |
| 6  | 0.709556  | -0.331094 | 2.748831  |
| 6  | 1.485677  | 0.444048  | 3.464126  |
| 1  | 1.097527  | 1.326466  | 3.989683  |
| 6  | 4.042794  | 0.309471  | 0.409241  |
| 6  | 5.343271  | 0.462478  | 0.884951  |
| 6  | 6.437224  | 0.109051  | 0.083375  |
| 6  | 6.217904  | -0.398836 | -1.199779 |
| 6  | 4.914453  | -0.552567 | -1.679615 |
| 16 | -1.305167 | -2.093652 | -0.171918 |
| 8  | -0.701730 | -2.304557 | -1.484438 |
| 8  | -1.544846 | -3.189096 | 0.769439  |
| 6  | -2.840024 | -1.203468 | -0.415522 |
| 6  | -2.993189 | -0.417171 | -1.560172 |
| 6  | -4.152163 | 0.349713  | -1.696726 |
| 6  | -5.136536 | 0.318163  | -0.703445 |
| 6  | -4.974091 | -0.489370 | 0.428767  |
| 6  | -3.819358 | -1.259662 | 0.580451  |
| 1  | 2.355323  | -0.772747 | -2.435337 |
| 1  | -0.541201 | -2.003147 | 2.486133  |
| 1  | 3.191332  | 0.582875  | 1.037652  |
| 1  | 5.508347  | 0.860916  | 1.889504  |
| 1  | 7.456012  | 0.230114  | 0.460011  |
| 1  | 7.065050  | -0.677822 | -1.831591 |
| 1  | 4.747171  | -0.951993 | -2.683821 |
| 1  | -2.210682 | -0.408815 | -2.319980 |
| 1  | -4.284058 | 0.977432  | -2.580905 |
| 1  | -6.039775 | 0.923233  | -0.813945 |
| 1  | -5.751821 | -0.521852 | 1.195573  |
| 1  | -3.671949 | -1.902200 | 1.450319  |
| 6  | 0.229683  | 0.133675  | -0.085349 |

|   |           |          |           |
|---|-----------|----------|-----------|
| 1 | 2.560704  | 0.243506 | 3.566956  |
| 6 | -0.471866 | 1.443876 | -0.047261 |
| 6 | -1.575838 | 1.644433 | 0.798360  |
| 6 | -0.050420 | 2.508069 | -0.866267 |
| 6 | -2.245535 | 2.869666 | 0.817185  |
| 1 | -1.918212 | 0.833682 | 1.440490  |
| 6 | -0.719745 | 3.730767 | -0.845552 |
| 1 | 0.807271  | 2.366451 | -1.528391 |
| 6 | -1.823680 | 3.918042 | -0.004552 |
| 1 | -3.106125 | 3.001061 | 1.477897  |
| 1 | -0.379961 | 4.543472 | -1.492784 |
| 1 | -2.349797 | 4.875872 | 0.008526  |

|    |           |           |           |
|----|-----------|-----------|-----------|
| 1  | 0.590155  | -3.021430 | 1.154502  |
| 1  | 2.197783  | -3.572978 | 3.002563  |
| 1  | 4.562661  | -2.811263 | 2.850166  |
| 1  | 5.349074  | -1.530577 | 0.864641  |
| 1  | 3.755335  | -1.000811 | -0.988227 |
| 6  | 0.575582  | 0.753652  | 0.070097  |
| 1  | -2.512540 | 2.620430  | -2.398762 |
| 6  | 1.342394  | 1.993185  | 0.353720  |
| 6  | 2.496791  | 2.305802  | -0.383608 |
| 6  | 0.927422  | 2.865559  | 1.376791  |
| 6  | 3.223299  | 3.464448  | -0.098820 |
| 1  | 2.827077  | 1.636835  | -1.179485 |
| 6  | 1.656434  | 4.019198  | 1.659596  |
| 1  | 0.025781  | 2.636222  | 1.950200  |
| 6  | 2.807552  | 4.323457  | 0.922094  |
| 1  | 4.119941  | 3.696035  | -0.678542 |
| 1  | 1.323989  | 4.688402  | 2.456632  |
| 1  | 3.376087  | 5.229904  | 1.142563  |
| 19 | -2.722008 | -1.335548 | -1.541981 |

-----

**Structure S3. int2**

E(RB3LYP)sol = -2129.65007560 E(RB3LYP)gas = -  
2128.07412053

-----

|    |           |           |           |
|----|-----------|-----------|-----------|
| 6  | -0.318995 | 0.221200  | 0.883195  |
| 6  | -1.246785 | -0.357654 | 1.612332  |
| 6  | -2.694884 | -0.085680 | 1.464493  |
| 7  | 0.843478  | 0.128544  | -1.204993 |
| 6  | 0.295361  | 0.727805  | -2.375250 |
| 6  | -0.626189 | 1.672922  | -2.351958 |
| 6  | -1.421761 | 2.712059  | -2.331375 |
| 1  | -1.017365 | 3.729233  | -2.250725 |
| 6  | -3.168277 | 1.040098  | 0.753598  |
| 6  | -4.535185 | 1.209828  | 0.522794  |
| 6  | -5.456673 | 0.263537  | 0.997105  |
| 6  | -5.000252 | -0.842740 | 1.722007  |
| 6  | -3.631331 | -1.013458 | 1.960738  |
| 16 | 0.988199  | -1.586059 | -1.317149 |
| 8  | -0.340548 | -2.196064 | -1.045196 |
| 8  | 1.596985  | -1.838426 | -2.618266 |
| 6  | 2.093687  | -1.968854 | 0.014678  |
| 6  | 1.630818  | -2.698274 | 1.113014  |
| 6  | 2.533076  | -3.000618 | 2.134970  |
| 6  | 3.862836  | -2.573764 | 2.045633  |
| 6  | 4.307478  | -1.851617 | 0.931111  |
| 6  | 3.423087  | -1.547365 | -0.103910 |
| 1  | -0.961893 | -1.157178 | 2.310064  |
| 1  | 0.724995  | 0.365239  | -3.315315 |
| 1  | -2.452430 | 1.779824  | 0.385363  |
| 1  | -4.888574 | 2.093266  | -0.015332 |
| 1  | -6.525944 | 0.401909  | 0.821120  |
| 1  | -5.713445 | -1.571916 | 2.114106  |
| 1  | -3.282470 | -1.879034 | 2.530868  |

-----

**Structure S4. TS1**

E(RB3LYP)sol = -2129.61578339 E(RB3LYP)gas = -  
2128.04238551

-----

|    |           |           |           |
|----|-----------|-----------|-----------|
| 6  | -1.379697 | -0.047248 | 0.167172  |
| 6  | -2.433767 | 0.394549  | 0.917329  |
| 6  | -3.712836 | 0.758108  | 0.376581  |
| 7  | 0.505385  | -0.867141 | -0.992651 |
| 6  | -0.488189 | -1.770061 | -1.444535 |
| 6  | -1.769149 | -1.512981 | -1.133147 |
| 6  | -3.062565 | -1.684191 | -1.497450 |
| 1  | -3.388855 | -1.499994 | -2.525007 |
| 6  | -3.886331 | 0.983532  | -1.015424 |
| 6  | -5.154519 | 1.272781  | -1.533482 |
| 6  | -6.260199 | 1.333092  | -0.687743 |
| 6  | -6.104249 | 1.122474  | 0.696678  |
| 6  | -4.852755 | 0.844171  | 1.222056  |
| 16 | 1.802169  | -1.771919 | -0.183595 |
| 8  | 1.305413  | -2.075525 | 1.186511  |
| 8  | 2.112222  | -2.883897 | -1.077700 |
| 6  | 3.170713  | -0.659344 | -0.070208 |
| 6  | 3.378379  | 0.064318  | 1.107675  |
| 6  | 4.449233  | 0.956678  | 1.152588  |
| 6  | 5.285751  | 1.105701  | 0.040430  |
| 6  | 5.067720  | 0.358836  | -1.123638 |
| 6  | 4.001205  | -0.538032 | -1.189707 |

|    |           |           |           |
|----|-----------|-----------|-----------|
| 1  | -2.364252 | 0.312119  | 2.011881  |
| 1  | -0.148487 | -2.653841 | -1.986480 |
| 1  | -3.011358 | 1.021332  | -1.663537 |
| 1  | -5.271425 | 1.463321  | -2.602833 |
| 1  | -7.248747 | 1.559407  | -1.094278 |
| 1  | -6.972875 | 1.182852  | 1.356521  |
| 1  | -4.733540 | 0.682069  | 2.297171  |
| 1  | 2.708397  | -0.062509 | 1.957670  |
| 1  | 4.628089  | 1.540672  | 2.057416  |
| 1  | 6.120811  | 1.808829  | 0.082657  |
| 1  | 5.733453  | 0.471701  | -1.981894 |
| 1  | 3.815999  | -1.137221 | -2.082774 |
| 6  | -0.107856 | 0.174849  | -0.209730 |
| 1  | -3.845168 | -1.941782 | -0.778140 |
| 6  | 0.641070  | 1.433479  | -0.016258 |
| 6  | 1.525081  | 1.886721  | -1.013250 |
| 6  | 0.479283  | 2.198306  | 1.151738  |
| 6  | 2.238582  | 3.071412  | -0.836865 |
| 1  | 1.651498  | 1.298607  | -1.923199 |
| 6  | 1.197430  | 3.381802  | 1.326708  |
| 1  | -0.206888 | 1.856168  | 1.929114  |
| 6  | 2.081013  | 3.820610  | 0.334365  |
| 1  | 2.921159  | 3.412802  | -1.618370 |
| 1  | 1.068429  | 3.964732  | 2.241716  |
| 1  | 2.642645  | 4.747547  | 0.472258  |
| 19 | -1.033287 | -3.033059 | 1.712337  |

-----  
Frequencies -- -441.4025  
Red. masses -- 5.7330  
Frc consts -- 0.6581  
IR Inten -- 6.9104

### Structure S5. int3

E(RB3LYP)sol = -2129.71507735 E(RB3LYP)gas = -  
2128.14613645

|   |           |           |           |
|---|-----------|-----------|-----------|
| 6 | -1.478385 | 0.135333  | -0.226358 |
| 6 | -2.488579 | 1.137710  | 0.026775  |
| 6 | -3.797321 | 0.889155  | -0.291764 |
| 7 | 0.391356  | -1.063144 | -0.638469 |
| 6 | -0.712516 | -1.926407 | -0.810467 |
| 6 | -1.858368 | -1.218153 | -0.588659 |
| 6 | -3.308305 | -1.600962 | -0.654868 |
| 1 | -3.474831 | -2.433501 | -1.354608 |
| 6 | -4.172075 | -0.384342 | -1.054306 |
| 6 | -5.645322 | -0.698159 | -1.041657 |
| 6 | -6.565382 | 0.210510  | -0.664963 |

|    |           |           |           |
|----|-----------|-----------|-----------|
| 6  | -6.159969 | 1.525413  | -0.186631 |
| 6  | -4.850080 | 1.840204  | -0.004816 |
| 16 | 1.721592  | -1.818756 | 0.229733  |
| 8  | 1.416164  | -1.598603 | 1.665704  |
| 8  | 1.798091  | -3.173851 | -0.297177 |
| 6  | 3.181169  | -0.912886 | -0.191273 |
| 6  | 3.758372  | -0.059812 | 0.752723  |
| 6  | 4.923917  | 0.621580  | 0.400633  |
| 6  | 5.484371  | 0.444169  | -0.868836 |
| 6  | 4.894097  | -0.424977 | -1.795817 |
| 6  | 3.734162  | -1.122629 | -1.460033 |
| 1  | -2.199601 | 2.106651  | 0.441511  |
| 1  | -0.549470 | -2.967715 | -1.077555 |
| 1  | -3.919487 | -0.158192 | -2.114835 |
| 1  | -5.948107 | -1.683123 | -1.409358 |
| 1  | -7.630903 | -0.026871 | -0.711723 |
| 1  | -6.934887 | 2.255503  | 0.059826  |
| 1  | -4.566739 | 2.813024  | 0.406793  |
| 1  | 3.295698  | 0.073290  | 1.730289  |
| 1  | 5.392129  | 1.297275  | 1.119047  |
| 1  | 6.395195  | 0.983753  | -1.138700 |
| 1  | 5.345468  | -0.567582 | -2.779935 |
| 1  | 3.268908  | -1.818137 | -2.160927 |
| 6  | -0.091344 | 0.209145  | -0.250887 |
| 1  | -3.650925 | -1.957461 | 0.336814  |
| 6  | 0.786755  | 1.378487  | -0.097604 |
| 6  | 1.705701  | 1.710565  | -1.110994 |
| 6  | 0.702811  | 2.209098  | 1.034563  |
| 6  | 2.529607  | 2.827914  | -0.983223 |
| 1  | 1.765365  | 1.084044  | -2.002308 |
| 6  | 1.527184  | 3.329896  | 1.161346  |
| 1  | -0.015891 | 1.980037  | 1.826956  |
| 6  | 2.446437  | 3.639199  | 0.154029  |
| 1  | 3.237915  | 3.070356  | -1.778574 |
| 1  | 1.451583  | 3.963973  | 2.047872  |
| 1  | 3.091162  | 4.515619  | 0.251901  |
| 19 | -0.928063 | -1.072078 | 2.666914  |

### Structure S6. TS2

E(RB3LYP)sol = -2129.67231825 E(RB3LYP)gas = -  
2128.10675952

|   |           |           |           |
|---|-----------|-----------|-----------|
| 6 | -1.332514 | 0.375023  | -0.681371 |
| 6 | -2.407850 | 1.173273  | -0.199974 |
| 6 | -3.710522 | 0.694940  | -0.256482 |
| 7 | 0.638950  | -0.379254 | -1.518957 |

|    |           |           |           |
|----|-----------|-----------|-----------|
| 6  | -0.338603 | -1.416285 | -1.588379 |
| 6  | -1.549597 | -0.980435 | -1.106140 |
| 6  | -2.883198 | -1.642989 | -0.926786 |
| 1  | -3.050262 | -2.432980 | -1.674029 |
| 6  | -4.014250 | -0.596511 | -1.007893 |
| 6  | -5.373242 | -1.172041 | -0.732249 |
| 6  | -6.342108 | -0.454306 | -0.122556 |
| 6  | -6.069592 | 0.888362  | 0.349396  |
| 6  | -4.814380 | 1.430467  | 0.290301  |
| 16 | 1.395581  | -1.832683 | 0.231444  |
| 8  | 0.731613  | -1.097387 | 1.362538  |
| 8  | 1.337336  | -3.307935 | 0.210202  |
| 6  | 3.107590  | -1.310357 | 0.179958  |
| 6  | 3.446601  | -0.025432 | 0.613514  |
| 6  | 4.783464  | 0.365264  | 0.529580  |
| 6  | 5.743898  | -0.512987 | 0.012139  |
| 6  | 5.377694  | -1.792568 | -0.420714 |
| 6  | 4.045158  | -2.204393 | -0.345699 |
| 1  | -2.227439 | 2.185903  | 0.168755  |
| 1  | -0.089022 | -2.366949 | -2.058983 |
| 1  | -4.051852 | -0.263410 | -2.072607 |
| 1  | -5.572361 | -2.181412 | -1.103877 |
| 1  | -7.340559 | -0.873440 | 0.020844  |
| 1  | -6.886286 | 1.465178  | 0.791078  |
| 1  | -4.625675 | 2.426111  | 0.701695  |
| 1  | 2.687328  | 0.650362  | 1.006363  |
| 1  | 5.073022  | 1.362817  | 0.866676  |
| 1  | 6.787460  | -0.196645 | -0.054880 |
| 1  | 6.131553  | -2.475804 | -0.817960 |
| 1  | 3.737395  | -3.199548 | -0.670627 |
| 6  | 0.061321  | 0.668024  | -0.935781 |
| 1  | -2.938091 | -2.151798 | 0.059064  |
| 6  | 0.831263  | 1.880668  | -0.615431 |
| 6  | 1.924955  | 2.243313  | -1.424938 |
| 6  | 0.560732  | 2.651749  | 0.530436  |
| 6  | 2.715310  | 3.344803  | -1.099580 |
| 1  | 2.148032  | 1.639951  | -2.306397 |
| 6  | 1.354326  | 3.755068  | 0.857146  |
| 1  | -0.265652 | 2.379560  | 1.191248  |
| 6  | 2.434288  | 4.105883  | 0.041899  |
| 1  | 3.557615  | 3.614189  | -1.741329 |
| 1  | 1.131586  | 4.340306  | 1.752729  |
| 1  | 3.053722  | 4.969825  | 0.293787  |
| 19 | -1.364133 | -0.551744 | 2.544934  |

Frc consts -- 0.1802  
 IR Inten -- 66.3553

### Structure S7. int4

E(RB3LYP)<sub>sol</sub> = -2129.70961713 E(RB3LYP)<sub>gas</sub> = -2128.14444160

|    |           |           |           |
|----|-----------|-----------|-----------|
| 6  | -1.048939 | 0.834852  | -0.782988 |
| 6  | -2.349163 | 1.214890  | -0.276897 |
| 6  | -3.400823 | 0.340734  | -0.370791 |
| 7  | 1.240873  | 0.743943  | -1.140270 |
| 6  | 0.667987  | -0.543602 | -1.394587 |
| 6  | -0.815215 | -0.412578 | -1.293902 |
| 6  | -1.859946 | -1.467880 | -1.416838 |
| 1  | -1.783015 | -2.005175 | -2.375595 |
| 6  | -3.292346 | -0.898841 | -1.264037 |
| 6  | -4.264010 | -1.990362 | -0.895287 |
| 6  | -5.342838 | -1.748666 | -0.118416 |
| 6  | -5.584465 | -0.421752 | 0.427877  |
| 6  | -4.659654 | 0.571597  | 0.302151  |
| 16 | 1.161739  | -1.599911 | 0.111079  |
| 8  | 0.676935  | -0.853559 | 1.309355  |
| 8  | 0.596096  | -2.951521 | -0.090412 |
| 6  | 2.935706  | -1.665464 | 0.134943  |
| 6  | 3.652818  | -0.540747 | 0.560397  |
| 6  | 5.045866  | -0.613975 | 0.560402  |
| 6  | 5.690764  | -1.785810 | 0.143888  |
| 6  | 4.951882  | -2.897342 | -0.276352 |
| 6  | 3.556130  | -2.846251 | -0.287112 |
| 1  | -2.489754 | 2.176751  | 0.217086  |
| 1  | 1.099181  | -1.089977 | -2.247286 |
| 1  | -3.598362 | -0.521358 | -2.265106 |
| 1  | -4.100466 | -2.978236 | -1.336465 |
| 1  | -6.060338 | -2.544933 | 0.095647  |
| 1  | -6.510989 | -0.239520 | 0.977874  |
| 1  | -4.825289 | 1.545374  | 0.772384  |
| 1  | 3.130380  | 0.364149  | 0.870763  |
| 1  | 5.631749  | 0.247813  | 0.887120  |
| 1  | 6.782329  | -1.832324 | 0.147504  |
| 1  | 5.462169  | -3.808847 | -0.594886 |
| 1  | 2.955566  | -3.701111 | -0.602721 |
| 6  | 0.279659  | 1.521474  | -0.734485 |
| 1  | -1.663097 | -2.264931 | -0.668099 |
| 6  | 0.552312  | 2.908379  | -0.318887 |
| 6  | 1.584058  | 3.619362  | -0.963191 |
| 6  | -0.149566 | 3.528920  | 0.731329  |
| 6  | 1.886146  | 4.925302  | -0.581277 |

-----  
 Frequencies -- -171.8287  
 Red. masses -- 10.3567

|    |           |           |           |
|----|-----------|-----------|-----------|
| 1  | 2.134321  | 3.132260  | -1.770035 |
| 6  | 0.165581  | 4.832318  | 1.120627  |
| 1  | -0.916111 | 2.980926  | 1.280461  |
| 6  | 1.176642  | 5.536229  | 0.459633  |
| 1  | 2.678523  | 5.472208  | -1.097601 |
| 1  | -0.377528 | 5.299409  | 1.945507  |
| 1  | 1.414716  | 6.560076  | 0.757697  |
| 19 | -1.720720 | -1.471877 | 2.140087  |

|    |           |           |           |
|----|-----------|-----------|-----------|
| 1  | 3.744722  | 1.240042  | -1.635568 |
| 6  | -2.294830 | 0.668502  | -0.881982 |
| 1  | 1.295782  | -1.186902 | -1.387954 |
| 6  | -3.444954 | 1.193154  | -0.195830 |
| 6  | -3.821291 | 2.546358  | -0.415089 |
| 6  | -4.232573 | 0.404429  | 0.684557  |
| 6  | -4.918068 | 3.089470  | 0.244596  |
| 1  | -3.228083 | 3.145578  | -1.105513 |
| 6  | -5.331539 | 0.953760  | 1.330641  |
| 1  | -4.001795 | -0.649978 | 0.829531  |
| 6  | -5.674139 | 2.299460  | 1.119951  |
| 1  | -5.192513 | 4.132832  | 0.074532  |
| 1  | -5.936998 | 0.335211  | 1.996762  |
| 1  | -6.539208 | 2.726816  | 1.632855  |
| 19 | 1.989421  | -1.890786 | 1.966988  |

-----  
**Structure S8. TS3**

E(RB3LYP)sol = -2129.65566976 E(RB3LYP)gas = -  
2128.10558316

-----

|    |           |           |           |
|----|-----------|-----------|-----------|
| 6  | -1.596974 | -0.545301 | -0.746151 |
| 6  | -1.606181 | -1.640262 | 0.192721  |
| 6  | -0.836465 | -2.751499 | -0.017774 |
| 7  | -1.710239 | 1.470582  | -1.919525 |
| 6  | -0.738587 | 0.799967  | -2.427489 |
| 6  | -0.604441 | -0.534841 | -1.767637 |
| 6  | 0.305612  | -1.599927 | -1.993651 |
| 1  | 0.706075  | -1.678461 | -3.015946 |
| 6  | -0.077042 | -2.937599 | -1.334783 |
| 6  | 1.094603  | -3.884359 | -1.216856 |
| 6  | 1.200338  | -4.762780 | -0.197433 |
| 6  | 0.223657  | -4.774147 | 0.888554  |
| 6  | -0.731978 | -3.805518 | 0.974100  |
| 16 | 1.387331  | 0.665415  | -0.009793 |
| 8  | 0.885252  | 0.455708  | 1.408560  |
| 8  | 2.246611  | -0.580205 | -0.464763 |
| 6  | 2.664564  | 1.945158  | 0.103860  |
| 6  | 2.551795  | 2.890356  | 1.126351  |
| 6  | 3.496385  | 3.919656  | 1.189675  |
| 6  | 4.519445  | 3.995113  | 0.238819  |
| 6  | 4.611130  | 3.039335  | -0.780449 |
| 6  | 3.677216  | 2.003298  | -0.858281 |
| 1  | -2.180210 | -1.559658 | 1.117211  |
| 1  | -0.117898 | 1.171425  | -3.247850 |
| 1  | -0.794255 | -3.429564 | -2.032603 |
| 1  | 1.823114  | -3.885987 | -2.032981 |
| 1  | 2.019594  | -5.486491 | -0.176854 |
| 1  | 0.284923  | -5.557055 | 1.648756  |
| 1  | -1.423386 | -3.783683 | 1.822314  |
| 1  | 1.747438  | 2.808752  | 1.859802  |
| 1  | 3.430218  | 4.665277  | 1.985455  |
| 1  | 5.252034  | 4.803837  | 0.291764  |
| 1  | 5.416819  | 3.097510  | -1.516013 |

-----  
Frequencies -- -652.1045  
Red. masses -- 1.8414  
Frc consts -- 0.4614  
IR Inten -- 1536.0283

**Structure S9. K<sup>+</sup> + HSO<sub>2</sub>Ph**

E(RB3LYP)sol = -1380.94203562 E(RB3LYP)gas = -  
1380.18806996

-----

|    |           |           |           |
|----|-----------|-----------|-----------|
| 16 | -0.668125 | 1.149328  | 0.805944  |
| 8  | -1.567857 | 0.014971  | 1.230137  |
| 8  | -1.184014 | 1.550611  | -0.772479 |
| 6  | 0.861083  | 0.354030  | 0.280162  |
| 6  | 1.185131  | -0.881393 | 0.853189  |
| 6  | 2.402481  | -1.479275 | 0.513087  |
| 6  | 3.274878  | -0.839796 | -0.373742 |
| 6  | 2.939545  | 0.401843  | -0.928955 |
| 6  | 1.728766  | 1.013500  | -0.600112 |
| 1  | 0.500682  | -1.356625 | 1.559054  |
| 1  | 2.673255  | -2.442644 | 0.951009  |
| 1  | 4.227359  | -1.308751 | -0.631114 |
| 1  | 3.624366  | 0.896136  | -1.621526 |
| 1  | 1.455538  | 1.975844  | -1.037353 |
| 1  | -1.583988 | 2.438576  | -0.738742 |
| 19 | -2.765450 | -1.185784 | -0.710498 |

-----  
**Structure S10. int5**

E(RB3LYP)sol = -748.743864234 E(RB3LYP)gas = -  
747.921837389

|   |           |           |           |
|---|-----------|-----------|-----------|
| 6 | -0.031204 | 0.472811  | 0.118365  |
| 6 | -0.739482 | -0.766621 | 0.057814  |
| 6 | -2.110525 | -0.798129 | 0.118486  |
| 7 | 1.401683  | 2.273054  | -0.034152 |
| 6 | 0.205618  | 2.775793  | 0.028313  |
| 6 | -0.803157 | 1.725536  | 0.138726  |
| 6 | -2.148032 | 1.747258  | 0.232968  |
| 1 | -2.707795 | 2.688403  | 0.251598  |
| 6 | -2.908150 | 0.465848  | 0.416841  |
| 6 | -4.317912 | 0.442287  | -0.126137 |
| 6 | -4.924800 | -0.726177 | -0.415314 |
| 6 | -4.207310 | -1.989247 | -0.323206 |
| 6 | -2.866289 | -2.012187 | -0.088479 |
| 1 | -0.198422 | -1.700739 | -0.106824 |
| 1 | 0.019385  | 3.853196  | 0.000199  |
| 1 | -3.056093 | 0.447211  | 1.530341  |
| 1 | -4.851984 | 1.393979  | -0.201690 |
| 1 | -5.967078 | -0.735708 | -0.745661 |
| 1 | -4.748282 | -2.919410 | -0.512745 |
| 1 | -2.316073 | -2.957206 | -0.122969 |
| 6 | 1.300866  | 0.862180  | 0.040805  |
| 6 | 2.528890  | 0.066451  | 0.015456  |
| 6 | 3.724370  | 0.645851  | -0.462394 |
| 6 | 2.572380  | -1.269069 | 0.469826  |
| 6 | 4.905431  | -0.093449 | -0.513887 |
| 1 | 3.700689  | 1.685667  | -0.790969 |
| 6 | 3.756402  | -2.004696 | 0.417419  |
| 1 | 1.680871  | -1.724538 | 0.902383  |
| 6 | 4.928123  | -1.424010 | -0.080679 |
| 1 | 5.818312  | 0.372792  | -0.894119 |
| 1 | 3.768203  | -3.035961 | 0.780152  |
| 1 | 5.855175  | -2.001665 | -0.120164 |

-----

**Structure S11. 35**

E(RB3LYP)sol = -748.819974353 E(RB3LYP)gas = -747.999251507

-----

|   |           |           |           |
|---|-----------|-----------|-----------|
| 6 | 0.084602  | 0.531373  | -0.062194 |
| 6 | 0.702410  | -0.697261 | 0.059478  |
| 6 | 2.124069  | -0.764899 | 0.080954  |
| 7 | -1.461887 | 2.255043  | -0.133695 |
| 6 | -0.140232 | 2.867368  | -0.175364 |
| 6 | 0.851278  | 1.731756  | -0.130475 |
| 6 | 2.223771  | 1.701466  | -0.112849 |
| 1 | 2.814992  | 2.620528  | -0.162676 |
| 6 | 2.896462  | 0.447562  | -0.014822 |

|   |           |           |           |
|---|-----------|-----------|-----------|
| 6 | 4.316387  | 0.356101  | 0.005179  |
| 6 | 4.948954  | -0.864696 | 0.115389  |
| 6 | 4.188938  | -2.058684 | 0.213277  |
| 6 | 2.811291  | -2.007138 | 0.197057  |
| 1 | 0.127366  | -1.619843 | 0.155847  |
| 1 | -0.023633 | 3.563446  | 0.675793  |
| 1 | -0.048867 | 3.485751  | -1.087204 |
| 1 | 4.902225  | 1.276614  | -0.067901 |
| 1 | 6.040622  | -0.916175 | 0.128839  |
| 1 | 4.700732  | -3.020244 | 0.301808  |
| 1 | 2.222997  | -2.925935 | 0.272397  |
| 6 | -1.334862 | 0.969258  | -0.086704 |
| 6 | -2.519142 | 0.080636  | -0.037027 |
| 6 | -3.690526 | 0.528371  | 0.600563  |
| 6 | -2.518692 | -1.188412 | -0.641644 |
| 6 | -4.824536 | -0.281658 | 0.649409  |
| 1 | -3.689394 | 1.522085  | 1.052184  |
| 6 | -3.659090 | -1.995474 | -0.598859 |
| 1 | -1.634743 | -1.534071 | -1.179987 |
| 6 | -4.811826 | -1.548129 | 0.052459  |
| 1 | -5.725606 | 0.075453  | 1.154789  |
| 1 | -3.647745 | -2.975813 | -1.082087 |
| 1 | -5.701270 | -2.182343 | 0.091126  |

-----

**Structure S12. TS1'**

E(RB3LYP)sol = -1529.74123226 E(RB3LYP)gas = -1528.29060367

-----

|    |           |           |           |
|----|-----------|-----------|-----------|
| 6  | 1.542158  | -0.395816 | -0.607082 |
| 6  | 2.663195  | 0.178060  | -1.133331 |
| 6  | 3.869717  | 0.403720  | -0.387279 |
| 7  | -0.449388 | -1.356045 | 0.216212  |
| 6  | 0.448950  | -2.431010 | 0.379353  |
| 6  | 1.758519  | -2.179733 | 0.231853  |
| 6  | 3.012683  | -2.520076 | 0.595230  |
| 1  | 3.267650  | -2.728552 | 1.638919  |
| 6  | 3.908890  | 0.243317  | 1.022938  |
| 6  | 5.110203  | 0.397737  | 1.723764  |
| 6  | 6.289332  | 0.703982  | 1.045232  |
| 6  | 6.268247  | 0.870555  | -0.352121 |
| 6  | 5.082109  | 0.723317  | -1.055915 |
| 16 | -1.900862 | -1.786613 | -0.700277 |
| 8  | -1.706882 | -1.422008 | -2.104482 |
| 8  | -2.204767 | -3.161071 | -0.295766 |
| 6  | -3.142901 | -0.708799 | 0.000310  |
| 6  | -3.646041 | 0.335350  | -0.775797 |

|   |           |           |           |
|---|-----------|-----------|-----------|
| 6 | -4.617157 | 1.171391  | -0.220382 |
| 6 | -5.066422 | 0.953569  | 1.085566  |
| 6 | -4.557464 | -0.108625 | 1.844189  |
| 6 | -3.591448 | -0.955984 | 1.300564  |
| 1 | 2.722906  | 0.271009  | -2.225351 |
| 1 | 0.021795  | -3.423404 | 0.520981  |
| 1 | 2.980478  | 0.062712  | 1.563834  |
| 1 | 5.118828  | 0.282125  | 2.810769  |
| 1 | 7.226249  | 0.821548  | 1.595544  |
| 1 | 7.191039  | 1.114338  | -0.885004 |
| 1 | 5.070560  | 0.844215  | -2.142822 |
| 1 | -3.260326 | 0.493514  | -1.783351 |
| 1 | -5.014284 | 2.002201  | -0.807543 |
| 1 | -5.821387 | 1.615044  | 1.517832  |
| 1 | -4.919088 | -0.279281 | 2.860971  |
| 1 | -3.186335 | -1.795839 | 1.867735  |
| 6 | 0.264672  | -0.205968 | -0.251156 |
| 1 | 3.836554  | -2.521298 | -0.124138 |
| 6 | -0.405816 | 1.112719  | -0.184198 |
| 6 | -1.081383 | 1.496215  | 0.987576  |
| 6 | -0.373090 | 1.995065  | -1.274583 |
| 6 | -1.712162 | 2.737521  | 1.065146  |
| 1 | -1.117246 | 0.804678  | 1.831160  |
| 6 | -1.010266 | 3.235710  | -1.197175 |
| 1 | 0.141641  | 1.690245  | -2.187833 |
| 6 | -1.681486 | 3.610231  | -0.028291 |
| 1 | -2.236410 | 3.022502  | 1.980528  |
| 1 | -0.986795 | 3.911773  | -2.055709 |
| 1 | -2.181346 | 4.580524  | 0.029948  |

-----  
 Frequencies -- -511.6211

Red. masses -- 5.7820

Frc consts -- 0.8917

IR Inten -- 8.2614

### Structure S13. int3'

E(RB3LYP)sol = -1529.84757629 E(RB3LYP)gas = -  
 1528.40430807

|   |           |           |           |
|---|-----------|-----------|-----------|
| 6 | -1.304981 | 0.164710  | 0.535307  |
| 6 | -2.319258 | 1.115604  | 0.147838  |
| 6 | -3.560249 | 0.679266  | -0.218669 |
| 7 | 0.527804  | -0.916510 | 1.241891  |
| 6 | -0.521577 | -1.844860 | 1.234300  |
| 6 | -1.656539 | -1.203682 | 0.824651  |
| 6 | -3.088296 | -1.640602 | 0.745931  |
| 1 | -3.175346 | -2.718523 | 0.536061  |

|    |           |           |           |
|----|-----------|-----------|-----------|
| 6  | -3.825096 | -0.826616 | -0.343190 |
| 6  | -5.289074 | -1.175773 | -0.428424 |
| 6  | -6.240133 | -0.248953 | -0.654749 |
| 6  | -5.901554 | 1.164914  | -0.766251 |
| 6  | -4.632065 | 1.596020  | -0.546645 |
| 16 | 2.175520  | -1.477099 | 1.162174  |
| 8  | 2.992525  | -0.608641 | 2.000203  |
| 8  | 2.085740  | -2.913554 | 1.412330  |
| 6  | 2.598494  | -1.197621 | -0.552338 |
| 6  | 3.310721  | -0.047698 | -0.902127 |
| 6  | 3.600804  | 0.170653  | -2.251067 |
| 6  | 3.183281  | -0.749429 | -3.218131 |
| 6  | 2.477378  | -1.900446 | -2.845802 |
| 6  | 2.180558  | -2.135230 | -1.502479 |
| 1  | -2.088525 | 2.184362  | 0.158069  |
| 1  | -0.336376 | -2.871703 | 1.535046  |
| 1  | -3.369051 | -1.133822 | -1.311899 |
| 1  | -5.552259 | -2.234806 | -0.341472 |
| 1  | -7.288389 | -0.546301 | -0.748349 |
| 1  | -6.695873 | 1.882000  | -0.988521 |
| 1  | -4.398510 | 2.664816  | -0.570642 |
| 1  | 3.618773  | 0.659679  | -0.131542 |
| 1  | 4.151267  | 1.067251  | -2.544429 |
| 1  | 3.411642  | -0.571086 | -4.271887 |
| 1  | 2.161058  | -2.620008 | -3.604538 |
| 1  | 1.642034  | -3.030122 | -1.185669 |
| 6  | 0.052754  | 0.328401  | 0.786700  |
| 1  | -3.586699 | -1.462578 | 1.717845  |
| 6  | 0.867883  | 1.538832  | 0.617372  |
| 6  | 0.758705  | 2.275602  | -0.579406 |
| 6  | 1.737424  | 2.007410  | 1.620895  |
| 6  | 1.507650  | 3.437100  | -0.773641 |
| 1  | 0.098660  | 1.909434  | -1.368408 |
| 6  | 2.493454  | 3.162876  | 1.417802  |
| 1  | 1.826960  | 1.452392  | 2.553632  |
| 6  | 2.384544  | 3.881246  | 0.221691  |
| 1  | 1.415792  | 3.990627  | -1.711732 |
| 1  | 3.168540  | 3.508755  | 2.204662  |
| 1  | 2.978271  | 4.786008  | 0.068086  |

### Structure S14. TS2'

E(RB3LYP)sol = -1529.79866105 E(RB3LYP)gas = -  
 1528.35497555

|   |          |          |           |
|---|----------|----------|-----------|
| 6 | 0.418275 | 0.598600 | -0.977541 |
| 6 | 1.299502 | 1.615417 | -0.513679 |

|    |           |           |           |
|----|-----------|-----------|-----------|
| 6  | 2.636377  | 1.331896  | -0.319656 |
| 7  | -1.351483 | -0.581564 | -1.786544 |
| 6  | -0.156119 | -1.297204 | -2.021645 |
| 6  | 0.939468  | -0.605545 | -1.541514 |
| 6  | 2.415788  | -0.852611 | -1.616776 |
| 1  | 2.650031  | -1.927334 | -1.558334 |
| 6  | 3.121527  | -0.106780 | -0.462665 |
| 6  | 4.615868  | -0.251275 | -0.492567 |
| 6  | 5.445064  | 0.763851  | -0.169245 |
| 6  | 4.916031  | 2.074892  | 0.161508  |
| 6  | 3.579397  | 2.339856  | 0.079429  |
| 16 | -1.575900 | -2.529084 | -0.243765 |
| 8  | -3.033372 | -2.402821 | -0.080596 |
| 8  | -0.955030 | -3.848757 | -0.488943 |
| 6  | -0.760294 | -1.724358 | 1.138370  |
| 6  | -1.412186 | -0.669002 | 1.778603  |
| 6  | -0.737720 | 0.012250  | 2.794417  |
| 6  | 0.560725  | -0.366014 | 3.151801  |
| 6  | 1.196717  | -1.429341 | 2.497494  |
| 6  | 0.543399  | -2.108275 | 1.466419  |
| 1  | 0.932745  | 2.625702  | -0.323416 |
| 1  | -0.177243 | -2.215272 | -2.608337 |
| 1  | 2.777840  | -0.610487 | 0.469323  |
| 1  | 5.014180  | -1.238298 | -0.747056 |
| 1  | 6.528015  | 0.615536  | -0.163194 |
| 1  | 5.612874  | 2.868990  | 0.441713  |
| 1  | 3.204245  | 3.348484  | 0.275382  |
| 1  | -2.424282 | -0.392844 | 1.481061  |
| 1  | -1.230911 | 0.844680  | 3.301266  |
| 1  | 1.083543  | 0.169981  | 3.947738  |
| 1  | 2.206618  | -1.726812 | 2.789919  |
| 1  | 1.015134  | -2.931833 | 0.928009  |
| 6  | -1.025831 | 0.531423  | -1.134409 |
| 1  | 2.818839  | -0.491784 | -2.583044 |
| 6  | -2.064268 | 1.463976  | -0.663468 |
| 6  | -1.820941 | 2.429201  | 0.332938  |
| 6  | -3.370488 | 1.358514  | -1.183735 |
| 6  | -2.840078 | 3.277591  | 0.773633  |
| 1  | -0.838609 | 2.492841  | 0.801030  |
| 6  | -4.386336 | 2.202466  | -0.738316 |
| 1  | -3.569580 | 0.591456  | -1.933566 |
| 6  | -4.126630 | 3.172388  | 0.237940  |
| 1  | -2.628472 | 4.017826  | 1.550026  |
| 1  | -5.392013 | 2.102649  | -1.155044 |
| 1  | -4.924448 | 3.833956  | 0.584856  |

Red. masses -- 9.8687  
 Frc consts -- 0.1835  
 IR Inten -- 12.3014

**Structure S15. int4'**

E(RB3LYP)sol = -1529.84289283 E(RB3LYP)gas = -1528.39447272

-----

|    |           |           |           |
|----|-----------|-----------|-----------|
| 6  | -0.359785 | -0.785773 | -0.826409 |
| 6  | -1.106874 | -1.925619 | -0.340023 |
| 6  | -2.432151 | -1.774513 | -0.042494 |
| 7  | 1.324444  | 0.567764  | -1.667446 |
| 6  | 0.065790  | 1.252122  | -1.780845 |
| 6  | -0.992589 | 0.344980  | -1.260584 |
| 6  | -2.477209 | 0.494131  | -1.226191 |
| 1  | -2.758874 | 1.547044  | -1.080445 |
| 6  | -3.045968 | -0.371272 | -0.085312 |
| 6  | -4.550890 | -0.362510 | -0.052229 |
| 6  | -5.267562 | -1.457291 | 0.271123  |
| 6  | -4.610970 | -2.730686 | 0.534952  |
| 6  | -3.268661 | -2.877579 | 0.372853  |
| 16 | 0.177356  | 2.809313  | -0.708596 |
| 8  | 1.273440  | 3.630323  | -1.230071 |
| 8  | -1.193160 | 3.345479  | -0.617676 |
| 6  | 0.643829  | 2.140036  | 0.892120  |
| 6  | 1.982190  | 1.804427  | 1.113397  |
| 6  | 2.328812  | 1.209418  | 2.328628  |
| 6  | 1.348463  | 0.973109  | 3.299560  |
| 6  | 0.016154  | 1.334092  | 3.067483  |
| 6  | -0.346725 | 1.920700  | 1.852280  |
| 1  | -0.627662 | -2.902501 | -0.248716 |
| 1  | -0.104655 | 1.710740  | -2.769628 |
| 1  | -2.703792 | 0.115825  | 0.857822  |
| 1  | -5.045588 | 0.591450  | -0.258672 |
| 1  | -6.358466 | -1.408334 | 0.324924  |
| 1  | -5.223799 | -3.587726 | 0.826039  |
| 1  | -2.797164 | -3.854768 | 0.513127  |
| 1  | 2.721650  | 1.990928  | 0.333770  |
| 1  | 3.366965  | 0.925558  | 2.515301  |
| 1  | 1.626117  | 0.505692  | 4.247747  |
| 1  | -0.742845 | 1.156126  | 3.833023  |
| 1  | -1.375848 | 2.215131  | 1.640131  |
| 6  | 1.087244  | -0.572310 | -1.085884 |
| 1  | -2.905917 | 0.177789  | -2.200583 |
| 6  | 2.188297  | -1.479345 | -0.709391 |
| 6  | 2.094832  | -2.311729 | 0.420438  |
| 6  | 3.383582  | -1.467946 | -1.452521 |

-----  
 Frequencies -- -177.6683



|   |          |           |           |
|---|----------|-----------|-----------|
| 6 | 3.170266 | -3.122754 | 0.792038  |
| 1 | 1.191864 | -2.297384 | 1.032898  |
| 6 | 4.450847 | -2.285946 | -1.084796 |
| 1 | 3.454231 | -0.804769 | -2.316549 |
| 6 | 4.346833 | -3.117718 | 0.037252  |
| 1 | 3.089885 | -3.757460 | 1.678162  |
| 1 | 5.371341 | -2.275464 | -1.673986 |
| 1 | 5.184986 | -3.757802 | 0.324602  |

|   |           |           |           |
|---|-----------|-----------|-----------|
| 1 | -1.075443 | -0.272146 | -2.385656 |
| 1 | 0.828840  | 4.104331  | -0.224970 |
| 1 | -1.362701 | -0.314990 | 1.420731  |
| 1 | -3.423701 | -0.993590 | 2.634118  |
| 1 | -5.463065 | -1.667461 | 1.361320  |
| 1 | -5.419062 | -1.666335 | -1.134495 |
| 1 | -3.356235 | -0.992557 | -2.343460 |
| 6 | 1.275479  | 0.812016  | -0.365868 |
| 1 | -2.831222 | 2.487540  | -0.068247 |
| 6 | 2.441295  | -0.095229 | -0.115263 |
| 6 | 3.706751  | 0.448356  | 0.162602  |
| 6 | 2.297396  | -1.493546 | -0.146079 |
| 6 | 4.800790  | -0.387868 | 0.395982  |
| 1 | 3.814028  | 1.533270  | 0.188437  |
| 6 | 3.391512  | -2.326810 | 0.090102  |
| 1 | 1.317244  | -1.930273 | -0.352564 |
| 6 | 4.649691  | -1.777582 | 0.361142  |
| 1 | 5.779533  | 0.050769  | 0.607982  |
| 1 | 3.260717  | -3.411794 | 0.064064  |
| 1 | 5.506639  | -2.430322 | 0.546571  |

**Structure S16. SO<sub>2</sub>Ph**

E(UB3LYP)<sub>sol</sub> = -780.436089511 E(UB3LYP)<sub>gas</sub> = -779.809792948

|    |           |           |           |
|----|-----------|-----------|-----------|
| 16 | 1.713459  | -0.000017 | -0.257069 |
| 8  | 2.203563  | -1.304096 | 0.269194  |
| 8  | 2.203788  | 1.303992  | 0.269654  |
| 6  | -0.097232 | -0.000049 | -0.085987 |
| 6  | -0.768554 | -1.224555 | -0.052963 |
| 6  | -2.163106 | -1.214910 | 0.032574  |
| 6  | -2.857054 | 0.000053  | 0.072940  |
| 6  | -2.162939 | 1.214987  | 0.032364  |
| 6  | -0.768398 | 1.224582  | -0.053336 |
| 1  | -0.202499 | -2.157551 | -0.075805 |
| 1  | -2.708877 | -2.160674 | 0.071426  |
| 1  | -3.947894 | 0.000063  | 0.137726  |
| 1  | -2.708505 | 2.160879  | 0.071097  |
| 1  | -0.202667 | 2.157744  | -0.075678 |

**Structure S17. int6**

E(UB3LYP)<sub>sol</sub> = -749.267057336 E(UB3LYP)<sub>gas</sub> = -748.441984684

|   |           |           |           |
|---|-----------|-----------|-----------|
| 6 | 0.090214  | 0.302231  | -0.769983 |
| 6 | -1.013705 | -0.186177 | -1.289340 |
| 6 | -2.217160 | -0.604462 | -0.544775 |
| 7 | 1.509613  | 2.152131  | -0.228985 |
| 6 | 0.513549  | 3.057592  | -0.104455 |
| 6 | -0.780202 | 2.844948  | 0.215528  |
| 6 | -2.008818 | 2.691872  | 0.629447  |
| 1 | -2.268543 | 2.726730  | 1.696054  |
| 6 | -2.254685 | -0.610541 | 0.863915  |
| 6 | -3.412116 | -0.991060 | 1.541032  |
| 6 | -4.556696 | -1.370219 | 0.827899  |
| 6 | -4.531344 | -1.369784 | -0.569903 |
| 6 | -3.371006 | -0.991750 | -1.249815 |

**Structure S18. TS4**

E(UB3LYP)<sub>sol</sub> = -749.255964090 E(UB3LYP)<sub>gas</sub> = -748.431095034

|   |           |           |           |
|---|-----------|-----------|-----------|
| 6 | 0.048609  | 0.682068  | -0.680209 |
| 6 | -0.938116 | -0.053729 | -1.214532 |
| 6 | -2.125029 | -0.522331 | -0.508315 |
| 7 | 1.696506  | 2.280172  | -0.052515 |
| 6 | 0.681385  | 3.125313  | -0.005346 |
| 6 | -0.638294 | 2.699631  | -0.028003 |
| 6 | -1.890200 | 2.745335  | 0.392869  |
| 1 | -2.166221 | 3.209680  | 1.349971  |
| 6 | -2.242991 | -0.417139 | 0.896912  |
| 6 | -3.393595 | -0.860867 | 1.547322  |
| 6 | -4.450526 | -1.415760 | 0.815974  |
| 6 | -4.346344 | -1.530592 | -0.576356 |
| 6 | -3.197766 | -1.090279 | -1.231003 |
| 1 | -0.907346 | -0.248147 | -2.297408 |
| 1 | 0.903109  | 4.200818  | -0.044437 |
| 1 | -1.414153 | 0.004558  | 1.468169  |
| 1 | -3.466594 | -0.777237 | 2.634748  |
| 1 | -5.351122 | -1.762203 | 1.329066  |
| 1 | -5.167107 | -1.965953 | -1.152124 |
| 1 | -3.120961 | -1.178387 | -2.318401 |
| 6 | 1.311883  | 0.970206  | -0.283489 |

|   |           |           |           |
|---|-----------|-----------|-----------|
| 1 | -2.699811 | 2.270816  | -0.173557 |
| 6 | 2.339119  | -0.090057 | -0.080871 |
| 6 | 3.665116  | 0.281567  | 0.208355  |
| 6 | 2.026542  | -1.459148 | -0.169895 |
| 6 | 4.650814  | -0.690529 | 0.389936  |
| 1 | 3.903852  | 1.342943  | 0.281337  |
| 6 | 3.014026  | -2.427491 | 0.013285  |
| 1 | 0.999323  | -1.766888 | -0.374806 |
| 6 | 4.331839  | -2.048355 | 0.292602  |
| 1 | 5.676830  | -0.383676 | 0.609850  |
| 1 | 2.751703  | -3.486330 | -0.057653 |
| 1 | 5.104117  | -2.808251 | 0.437429  |

|   |          |           |           |
|---|----------|-----------|-----------|
| 6 | 4.741391 | -0.715352 | -0.393893 |
| 1 | 3.919303 | 1.234048  | -0.846460 |
| 6 | 3.228170 | -2.277883 | 0.660701  |
| 1 | 1.245351 | -1.556734 | 1.070832  |
| 6 | 4.495490 | -1.984248 | 0.147430  |
| 1 | 5.732371 | -0.471823 | -0.786132 |
| 1 | 3.033405 | -3.254067 | 1.112620  |
| 1 | 5.290405 | -2.733642 | 0.179978  |

-----

**Structure S20. TS5**

E(UB3LYP)<sub>sol</sub> = -749.307528741 E(UB3LYP)<sub>gas</sub> = -748.484112931

|   |           |           |           |
|---|-----------|-----------|-----------|
| 6 | -0.055194 | 0.533923  | -0.279794 |
| 6 | -0.641908 | -0.675017 | -0.030993 |
| 6 | -2.073812 | -0.802620 | 0.176133  |
| 7 | 1.445868  | 2.262732  | -0.175523 |
| 6 | 0.154217  | 2.774776  | -0.332695 |
| 6 | -0.800605 | 1.795141  | -0.437321 |
| 6 | -2.231878 | 1.852076  | -0.665324 |
| 1 | -2.765172 | 2.773729  | -0.410766 |
| 6 | -2.811837 | 0.306599  | 0.746081  |
| 6 | -4.227793 | 0.191314  | 0.845684  |
| 6 | -4.889787 | -0.912905 | 0.328868  |
| 6 | -4.166512 | -1.988036 | -0.228908 |
| 6 | -2.771575 | -1.931628 | -0.280504 |
| 1 | -0.034029 | -1.583789 | 0.010980  |
| 1 | 0.006319  | 3.853785  | -0.406397 |
| 1 | -2.296706 | 0.934469  | 1.476616  |
| 1 | -4.791008 | 0.986709  | 1.340356  |
| 1 | -5.979663 | -0.971786 | 0.393563  |
| 1 | -4.693915 | -2.866120 | -0.607984 |
| 1 | -2.208210 | -2.762078 | -0.716040 |
| 6 | 1.362447  | 0.952731  | -0.191200 |
| 1 | -2.639893 | 1.307563  | -1.522372 |
| 6 | 2.547664  | 0.094304  | -0.045599 |
| 6 | 3.671252  | 0.574944  | 0.656423  |
| 6 | 2.613582  | -1.188097 | -0.624261 |
| 6 | 4.812577  | -0.213028 | 0.794943  |
| 1 | 3.622883  | 1.576898  | 1.086531  |
| 6 | 3.758810  | -1.975304 | -0.484549 |
| 1 | 1.777486  | -1.555751 | -1.222213 |
| 6 | 4.859720  | -1.493949 | 0.230437  |
| 1 | 5.673411  | 0.171932  | 1.347944  |
| 1 | 3.796023  | -2.965103 | -0.946957 |
| 1 | 5.755188  | -2.110925 | 0.340886  |

-----

Frequencies -- -505.8355  
 Red. masses -- 3.6151  
 Frc consts -- 0.5450  
 IR Inten -- 12.1481

**Structure S19. int7**

E(UB3LYP)<sub>sol</sub> = -749.350142970 E(UB3LYP)<sub>gas</sub> = -748.528394000

|   |           |           |           |
|---|-----------|-----------|-----------|
| 6 | -0.042972 | 0.856848  | -0.041607 |
| 6 | -0.729882 | -0.319693 | -0.227606 |
| 6 | -2.158942 | -0.604743 | -0.125106 |
| 7 | 1.788145  | 2.307079  | -0.026832 |
| 6 | 0.707921  | 3.053811  | -0.025150 |
| 6 | -0.527999 | 2.274391  | -0.034005 |
| 6 | -1.758597 | 2.819475  | -0.159580 |
| 1 | -1.859154 | 3.906961  | -0.225080 |
| 6 | -2.987644 | -0.004996 | 0.848298  |
| 6 | -4.337180 | -0.341613 | 0.946009  |
| 6 | -4.894958 | -1.287264 | 0.076857  |
| 6 | -4.082965 | -1.910703 | -0.877347 |
| 6 | -2.730031 | -1.584720 | -0.967323 |
| 1 | -0.121256 | -1.183024 | -0.512644 |
| 1 | 0.756328  | 4.146449  | -0.031158 |
| 1 | -2.552897 | 0.710036  | 1.549240  |
| 1 | -4.957713 | 0.128831  | 1.713200  |
| 1 | -5.953644 | -1.547277 | 0.153076  |
| 1 | -4.506461 | -2.660346 | -1.550687 |
| 1 | -2.098517 | -2.082714 | -1.708253 |
| 6 | 1.408484  | 0.989343  | -0.013041 |
| 1 | -2.671663 | 2.228851  | -0.224280 |
| 6 | 2.433525  | -0.048463 | 0.051596  |
| 6 | 3.731010  | 0.241291  | -0.435224 |
| 6 | 2.209700  | -1.324665 | 0.617922  |

-----  
 Frequencies -- -588.8237  
 Red. masses -- 5.9534  
 Frc consts -- 1.2161  
 IR Inten -- 39.8287

**Structure S21. int8**

E(UB3LYP)<sub>sol</sub> = -749.348025640 E(UB3LYP)<sub>gas</sub> = -  
 748.524940961

-----  
 6 -0.042773 0.516731 -0.156505  
 6 -0.673525 -0.714687 -0.051249  
 6 -2.077340 -0.788813 0.095698  
 7 1.450939 2.255102 -0.127517  
 6 0.143226 2.748232 -0.208363  
 6 -0.794657 1.748066 -0.226545  
 6 -2.285846 1.719444 -0.369004  
 1 -2.753978 2.638151 0.018431  
 6 -2.854427 0.490423 0.378541  
 6 -4.340646 0.336339 0.238183  
 6 -4.936290 -0.879921 0.144149  
 6 -4.148028 -2.083166 0.099517  
 6 -2.764564 -2.020816 0.061109  
 1 -0.103188 -1.646265 -0.058660  
 1 -0.024758 3.826042 -0.256957  
 1 -2.665164 0.693104 1.460669  
 1 -4.941576 1.250331 0.266885  
 1 -6.025401 -0.957552 0.089464  
 1 -4.651387 -3.051484 0.047992  
 1 -2.182319 -2.941010 -0.046055  
 6 1.377856 0.943281 -0.127514  
 1 -2.567862 1.644481 -1.437390  
 6 2.576764 0.097517 -0.043884  
 6 3.745020 0.613581 0.555020  
 6 2.617190 -1.207315 -0.573884  
 6 4.902042 -0.158062 0.640375  
 1 3.715537 1.631123 0.948466  
 6 3.778534 -1.978503 -0.487494  
 1 1.747212 -1.608487 -1.096042  
 6 4.923509 -1.460568 0.125118  
 1 5.796082 0.256355 1.113879  
 1 3.792518 -2.985827 -0.912027  
 1 5.831446 -2.065246 0.194368

**Structure S22. int9**

E(UB3LYP)<sub>sol</sub> = -2129.67031604 E(UB3LYP)<sub>gas</sub> = -

-----  
 6 1.515929 -0.264590 0.289312  
 6 2.486507 0.684027 -0.113031  
 6 3.906705 0.749420 0.157788  
 7 -0.550196 -1.119100 0.813539  
 6 0.379485 -2.124992 1.074081  
 6 1.674044 -1.673122 0.753792  
 6 2.809617 -2.487646 0.757649  
 1 2.728056 -3.525637 1.089373  
 6 4.514410 0.169562 1.300128  
 6 5.879387 0.312003 1.533209  
 6 6.681327 1.035005 0.639080  
 6 6.097039 1.640718 -0.480492  
 6 4.729772 1.512867 -0.710073  
 16 -1.989581 -1.746259 -0.029255  
 8 -1.600598 -1.755817 -1.461459  
 8 -2.302833 -2.996462 0.647816  
 6 -3.278057 -0.564638 0.225261  
 6 -3.668685 0.265661 -0.828663  
 6 -4.704613 1.172077 -0.602277  
 6 -5.322894 1.233599 0.651347  
 6 -4.921012 0.383525 1.689762  
 6 -3.892558 -0.535253 1.482835  
 1 2.090771 1.545246 -0.659425  
 1 0.054230 -3.104458 1.415816  
 1 3.897821 -0.359943 2.027773  
 1 6.323504 -0.130902 2.427982  
 1 7.752526 1.141146 0.825087  
 1 6.711955 2.223673 -1.170276  
 1 4.278363 2.003552 -1.577157  
 1 -3.163063 0.208589 -1.792084  
 1 -5.025840 1.835847 -1.407244  
 1 -6.131407 1.948417 0.821259  
 1 -5.417454 0.429876 2.661305  
 1 -3.576128 -1.218545 2.272939  
 6 0.125132 0.003109 0.300634  
 1 3.791840 -2.118715 0.467559  
 6 -0.589534 1.256543 0.014750  
 6 -1.373294 1.858571 1.017580  
 6 -0.510492 1.876502 -1.245293  
 6 -2.061937 3.043758 0.762378  
 1 -1.436095 1.387186 2.000124  
 6 -1.199043 3.064968 -1.499221  
 1 0.085378 1.419101 -2.039742  
 6 -1.977315 3.650495 -0.495793  
 1 -2.665567 3.499034 1.550656

|    |           |           |           |
|----|-----------|-----------|-----------|
| 1  | -1.130349 | 3.534231  | -2.483476 |
| 1  | -2.515037 | 4.580689  | -0.693367 |
| 19 | 0.866268  | -2.056805 | -2.342269 |

|    |           |           |           |
|----|-----------|-----------|-----------|
| 6  | 0.705343  | 2.029483  | 1.307369  |
| 6  | 2.343494  | 2.992521  | -0.741134 |
| 1  | 1.562558  | 1.363170  | -1.926493 |
| 6  | 1.501496  | 3.156302  | 1.523516  |
| 1  | 0.075400  | 1.646978  | 2.114752  |
| 6  | 2.323395  | 3.639189  | 0.499970  |
| 1  | 2.979716  | 3.369431  | -1.544974 |
| 1  | 1.482810  | 3.658223  | 2.493776  |
| 1  | 2.945322  | 4.521408  | 0.668478  |
| 19 | -0.909423 | -2.029732 | 2.449925  |

-----

**Structure S23. TS6**

E(UB3LYP)sol = -2129.65094959 E(UB3LYP)gas = -2128.08033493

-----

|    |           |           |           |
|----|-----------|-----------|-----------|
| 6  | -1.486902 | 0.035270  | -0.014389 |
| 6  | -2.482329 | 0.971312  | 0.444614  |
| 6  | -3.792135 | 0.957244  | -0.074633 |
| 7  | 0.401364  | -0.974368 | -0.801634 |
| 6  | -0.680678 | -1.865788 | -1.000911 |
| 6  | -1.844183 | -1.296115 | -0.546380 |
| 6  | -3.199729 | -1.793700 | -0.607784 |
| 1  | -3.451084 | -2.584013 | -1.318790 |
| 6  | -4.106771 | 0.249000  | -1.304357 |
| 6  | -5.454919 | 0.134574  | -1.720965 |
| 6  | -6.477973 | 0.675816  | -0.960309 |
| 6  | -6.178951 | 1.414632  | 0.216857  |
| 6  | -4.873814 | 1.567583  | 0.637243  |
| 16 | 1.773313  | -1.806792 | -0.052183 |
| 8  | 1.456686  | -1.857184 | 1.399661  |
| 8  | 1.917689  | -3.049135 | -0.799555 |
| 6  | 3.181092  | -0.766355 | -0.299979 |
| 6  | 3.678658  | -0.012646 | 0.766445  |
| 6  | 4.796133  | 0.791179  | 0.540529  |
| 6  | 5.389669  | 0.828395  | -0.726005 |
| 6  | 4.880635  | 0.055184  | -1.777253 |
| 6  | 3.767730  | -0.759750 | -1.570777 |
| 1  | -2.233804 | 1.688138  | 1.231025  |
| 1  | -0.500154 | -2.846184 | -1.435677 |
| 1  | -3.325381 | 0.133021  | -2.055269 |
| 1  | -5.678220 | -0.363775 | -2.667366 |
| 1  | -7.515867 | 0.577558  | -1.286744 |
| 1  | -6.992264 | 1.866906  | 0.789295  |
| 1  | -4.651318 | 2.128827  | 1.549000  |
| 1  | 3.191291  | -0.048271 | 1.740297  |
| 1  | 5.200906  | 1.394203  | 1.355594  |
| 1  | 6.262761  | 1.462747  | -0.895902 |
| 1  | 5.357967  | 0.080412  | -2.759125 |
| 1  | 3.364268  | -1.382144 | -2.371447 |
| 6  | -0.116500 | 0.189355  | -0.173342 |
| 1  | -3.852229 | -1.696330 | 0.261457  |
| 6  | 0.723529  | 1.369238  | 0.066144  |
| 6  | 1.550178  | 1.867140  | -0.958625 |

-----

Frequencies -- -544.5143  
 Red. masses -- 5.0715  
 Frc consts -- 0.8859  
 IR Inten -- 14.8881

**Structure S24. int9'**

E(UB3LYP)sol = -1529.80420177 E(UB3LYP)gas = -1528.36065108

-----

|    |           |           |           |
|----|-----------|-----------|-----------|
| 6  | 1.305991  | -0.459557 | -0.783985 |
| 6  | 2.370865  | 0.462296  | -0.626401 |
| 6  | 3.678952  | 0.286075  | -0.045901 |
| 7  | -0.815703 | -1.191727 | -1.153187 |
| 6  | -0.019373 | -2.318924 | -1.139649 |
| 6  | 1.323963  | -1.932509 | -0.962063 |
| 6  | 2.408942  | -2.797536 | -1.093058 |
| 1  | 2.235887  | -3.850420 | -1.327067 |
| 6  | 4.003716  | -0.757814 | 0.860257  |
| 6  | 5.270042  | -0.847017 | 1.430759  |
| 6  | 6.259646  | 0.098273  | 1.125310  |
| 6  | 5.955028  | 1.151133  | 0.252623  |
| 6  | 4.687303  | 1.249946  | -0.314096 |
| 16 | -2.548242 | -1.345228 | -0.898243 |
| 8  | -3.220321 | -0.433288 | -1.813748 |
| 8  | -2.786301 | -2.785037 | -0.938788 |
| 6  | -2.739766 | -0.755414 | 0.775061  |
| 6  | -3.187118 | 0.550058  | 0.993193  |
| 6  | -3.302278 | 1.001413  | 2.309938  |
| 6  | -2.973560 | 0.156160  | 3.374560  |
| 6  | -2.533195 | -1.151870 | 3.134259  |
| 6  | -2.415951 | -1.621372 | 1.825608  |
| 1  | 2.143806  | 1.485370  | -0.943100 |
| 1  | -0.449005 | -3.303975 | -1.292266 |
| 1  | 3.237916  | -1.485982 | 1.131147  |
| 1  | 5.488903  | -1.658005 | 2.130760  |
| 1  | 7.253820  | 0.020928  | 1.572216  |

|   |           |           |           |
|---|-----------|-----------|-----------|
| 1 | 6.713795  | 1.901930  | 0.016216  |
| 1 | 4.457821  | 2.079191  | -0.989202 |
| 1 | -3.425140 | 1.195208  | 0.146901  |
| 1 | -3.643584 | 2.021222  | 2.500331  |
| 1 | -3.062496 | 0.517346  | 4.402131  |
| 1 | -2.285172 | -1.810021 | 3.970144  |
| 1 | -2.087220 | -2.640236 | 1.613193  |
| 6 | -0.038058 | -0.047970 | -0.928701 |
| 1 | 3.438385  | -2.452609 | -1.017059 |
| 6 | -0.581286 | 1.313956  | -0.828353 |
| 6 | -0.259167 | 2.112142  | 0.288977  |
| 6 | -1.413528 | 1.857568  | -1.826117 |
| 6 | -0.769558 | 3.404162  | 0.414328  |
| 1 | 0.377292  | 1.695406  | 1.071886  |
| 6 | -1.930526 | 3.147392  | -1.692104 |
| 1 | -1.665285 | 1.256432  | -2.698911 |
| 6 | -1.614127 | 3.924795  | -0.572731 |
| 1 | -0.516463 | 4.003375  | 1.292727  |
| 1 | -2.580378 | 3.550065  | -2.473115 |
| 1 | -2.019848 | 4.934791  | -0.472714 |

|   |           |           |           |
|---|-----------|-----------|-----------|
| 6 | -1.670854 | -2.357941 | 1.317131  |
| 1 | 2.047053  | 2.242989  | -0.549126 |
| 1 | 0.054788  | -2.601414 | -2.190652 |
| 1 | 2.707857  | -1.227589 | 0.854189  |
| 1 | 4.967389  | -2.191137 | 1.225482  |
| 1 | 6.959627  | -0.711141 | 1.112735  |
| 1 | 6.698896  | 1.693616  | 0.470727  |
| 1 | 4.477134  | 2.589021  | -0.158535 |
| 1 | -3.430294 | 0.533153  | 0.766826  |
| 1 | -3.320999 | 0.590195  | 3.269997  |
| 1 | -2.145678 | -1.231103 | 4.501225  |
| 1 | -1.099794 | -3.117213 | 3.254288  |
| 1 | -1.228965 | -3.179236 | 0.750359  |
| 6 | -0.191552 | 0.452430  | -0.952496 |
| 1 | 3.573839  | -1.023345 | -2.041475 |
| 6 | -0.961277 | 1.629944  | -0.536392 |
| 6 | -0.660645 | 2.256924  | 0.690542  |
| 6 | -1.980722 | 2.174266  | -1.341503 |
| 6 | -1.365576 | 3.387656  | 1.103875  |
| 1 | 0.113917  | 1.829393  | 1.329811  |
| 6 | -2.687719 | 3.300803  | -0.920015 |
| 1 | -2.221876 | 1.700977  | -2.292262 |
| 6 | -2.386016 | 3.911268  | 0.302551  |
| 1 | -1.124967 | 3.855250  | 2.062111  |
| 1 | -3.478632 | 3.707689  | -1.555014 |
| 1 | -2.943441 | 4.793147  | 0.628472  |

-----  
**Structure S25. TS6'**

E(UB3LYP)<sub>sol</sub> = -1529.78313387 E(UB3LYP)<sub>gas</sub> = -  
1528.33825564  
-----

|    |           |           |           |
|----|-----------|-----------|-----------|
| 6  | 1.180931  | 0.256342  | -0.856816 |
| 6  | 2.199998  | 1.168417  | -0.412753 |
| 6  | 3.427235  | 0.700095  | 0.093908  |
| 7  | -0.753052 | -0.709750 | -1.533540 |
| 6  | 0.280790  | -1.636824 | -1.745769 |
| 6  | 1.478997  | -1.078587 | -1.380952 |
| 6  | 2.819451  | -1.613764 | -1.517250 |
| 1  | 2.965965  | -2.697172 | -1.516740 |
| 6  | 3.585608  | -0.684019 | 0.505230  |
| 6  | 4.865127  | -1.158685 | 0.880387  |
| 6  | 5.974285  | -0.328621 | 0.834678  |
| 6  | 5.824449  | 1.037750  | 0.475558  |
| 6  | 4.585051  | 1.540239  | 0.132470  |
| 16 | -2.340463 | -1.331803 | -1.139885 |
| 8  | -3.332700 | -0.376464 | -1.615720 |
| 8  | -2.317968 | -2.711452 | -1.619823 |
| 6  | -2.328766 | -1.320678 | 0.647370  |
| 6  | -2.929606 | -0.257555 | 1.326772  |
| 6  | -2.860263 | -0.234496 | 2.721633  |
| 6  | -2.199160 | -1.257269 | 3.410006  |
| 6  | -1.607714 | -2.316970 | 2.710980  |

-----  
Frequencies -- -532.3474  
Red. masses -- 4.8853  
Frc consts -- 0.8157  
IR Inten -- 2.9282  
-----

# Measurement and characterization of photophysical properties

## Materials and Methods

**UV-visible absorption:** The UV-visible absorption spectra of samples were dissolved in THF and recorded on Shimadzu UV-2450 UV-Vis spectrophotometer.

**Fluorescence:** The Fluorescence spectra of sample were dissolved in THF and recorded on the Edinburgh Instruments FLS5 fluorescence spectrofluorometer.

**Absolute fluorescence quantum yield:** The absolute fluorescence quantum yield of samples was dissolved in THF ( $5 \times 10^{-6}$  mol/L) and measured on the Edinburgh Instruments FLS1000 three-monochromator spectrophotometer.

**Molar absorption coefficient:** The samples were dissolved in THF and mixed into solutions of different concentrations to test their UV-vis absorption spectra. The molar absorption coefficient was obtained by plotting the maximum absorption intensity of different concentrations.

## UV-visible absorption spectrum and fluorescence spectra of 1-18

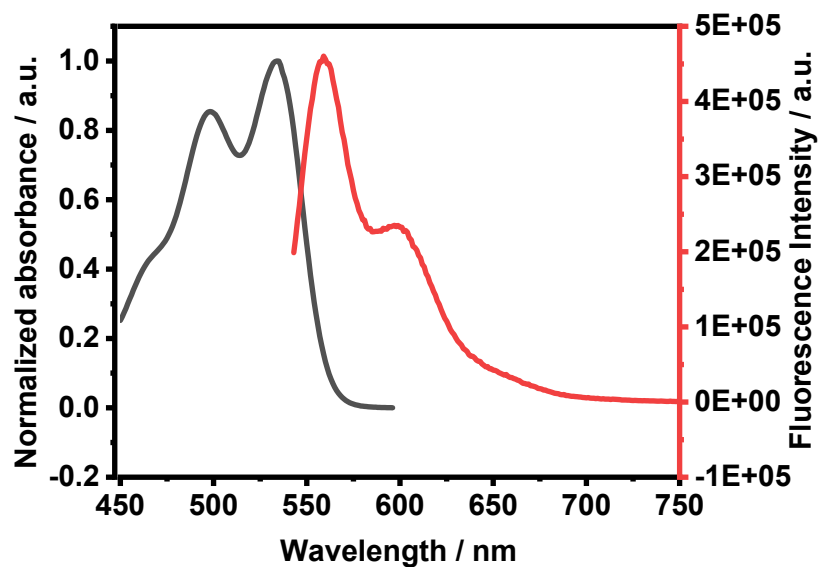

Figure S5. UV-visible absorption spectrum and fluorescence spectrum of 1

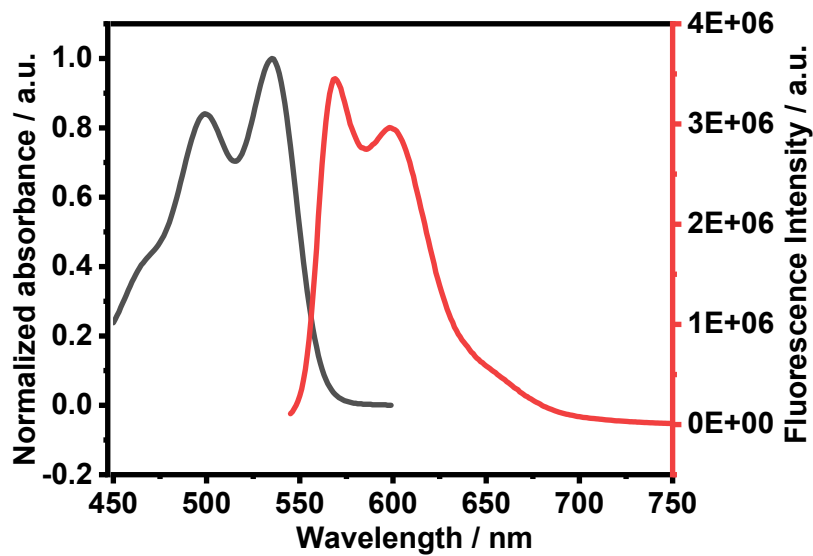

Figure S6. UV-visible absorption spectrum and fluorescence spectrum of 2

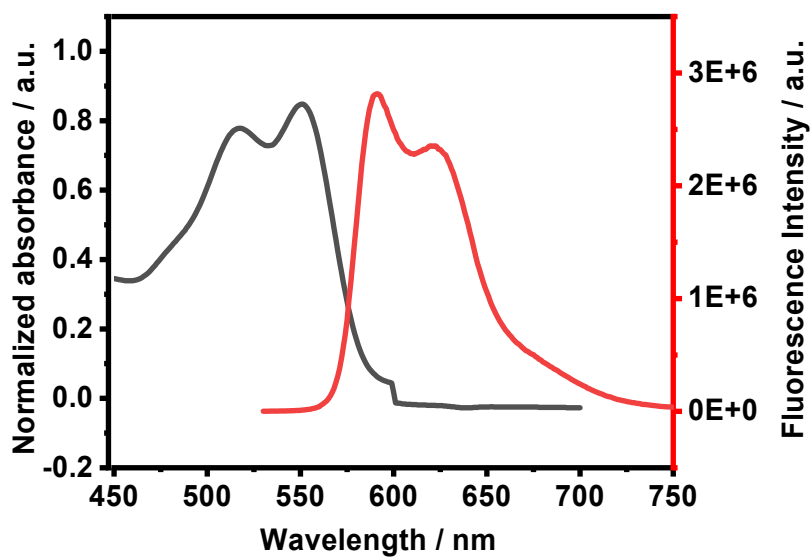

Figure S7. UV-visible absorption spectrum and fluorescence spectrum of 3

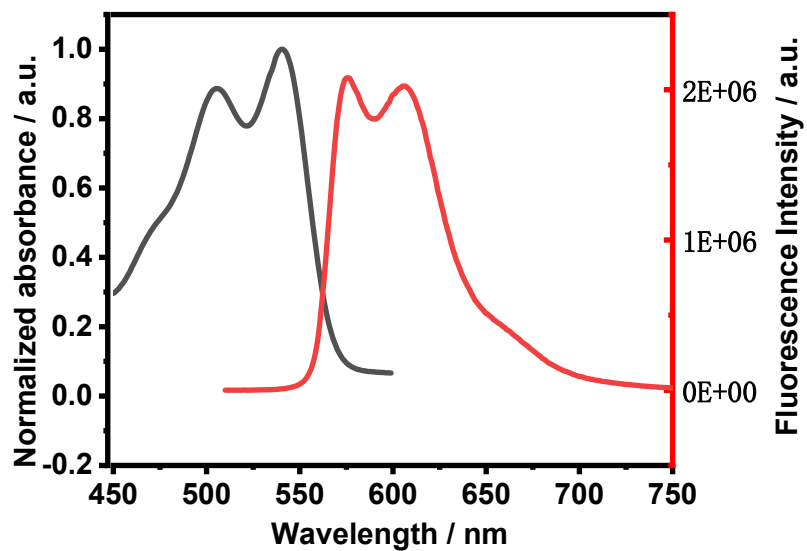

Figure S8. UV-visible absorption spectrum and fluorescence spectrum of 4



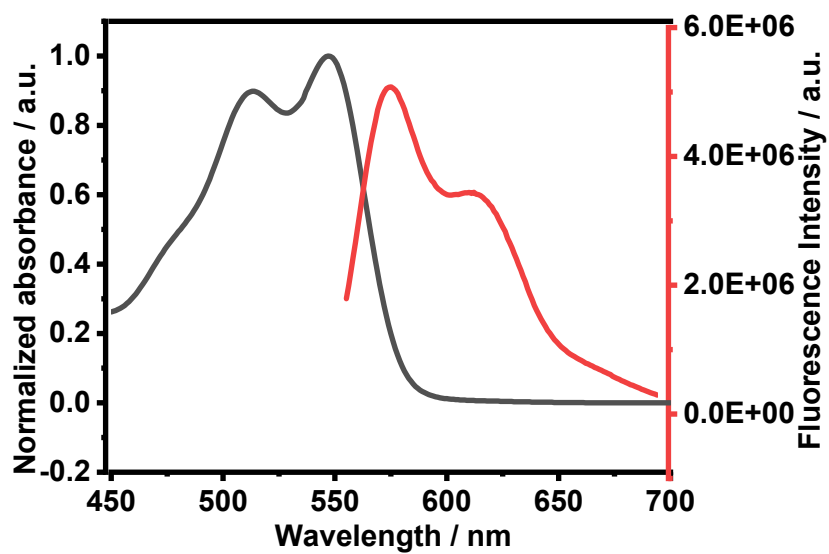

Figure S9. UV-visible absorption spectrum and fluorescence spectrum of 5

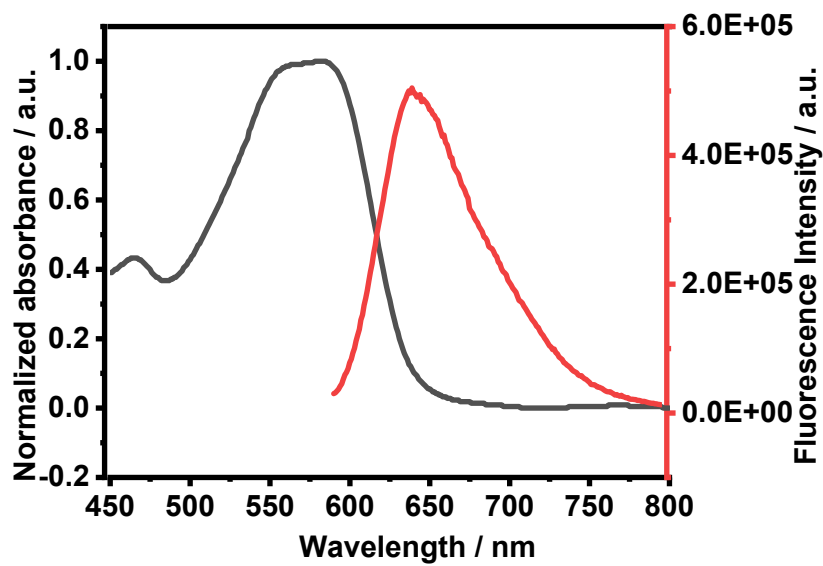

Figure S10. UV-visible absorption spectrum and fluorescence spectrum of 6

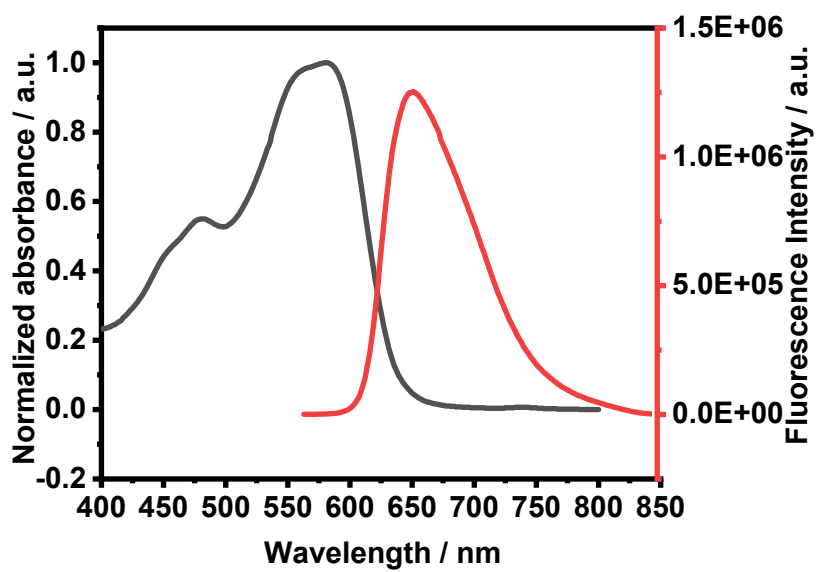

Figure S11. UV-visible absorption spectrum and fluorescence spectrum of 7

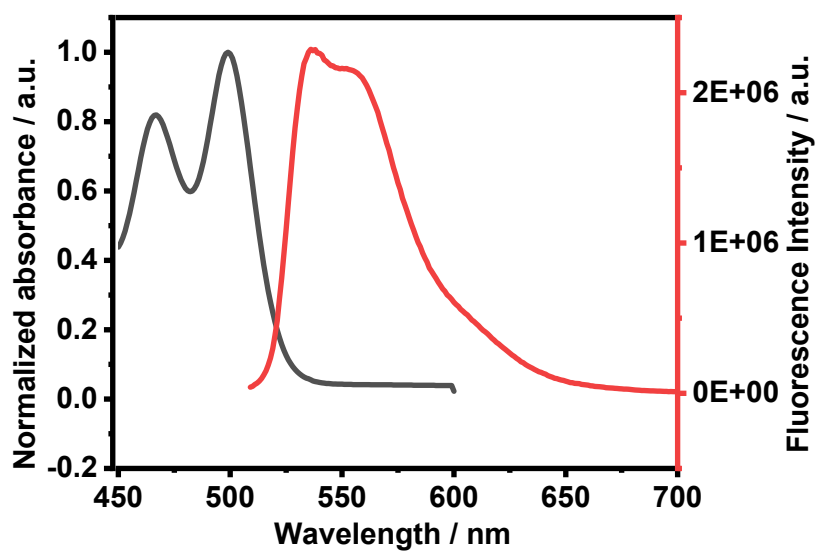

Figure S12. UV-visible absorption spectrum and fluorescence spectrum of 8

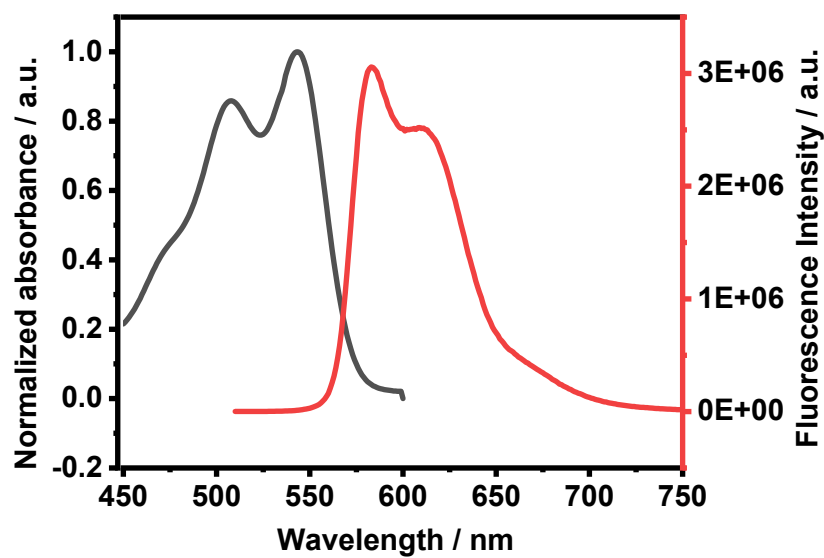

Figure S13. UV-visible absorption spectrum and fluorescence spectrum of 9

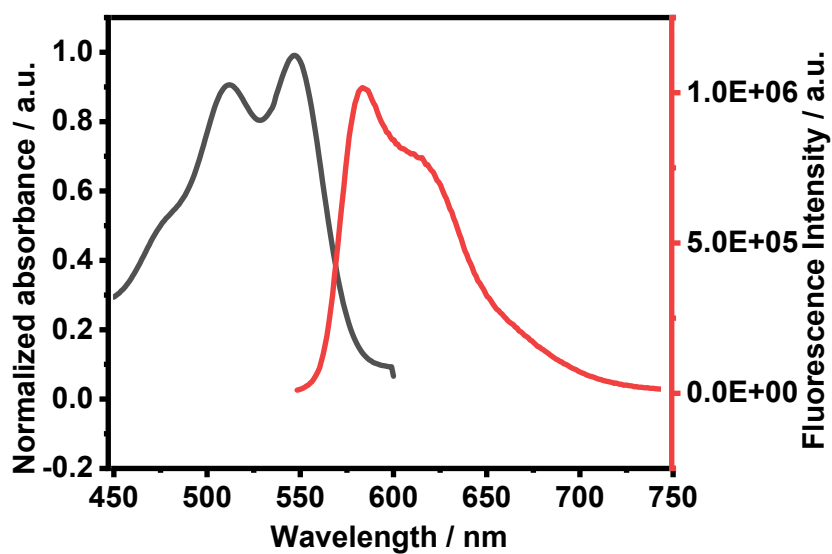

Figure S14. UV-visible absorption spectrum and fluorescence spectrum of 10

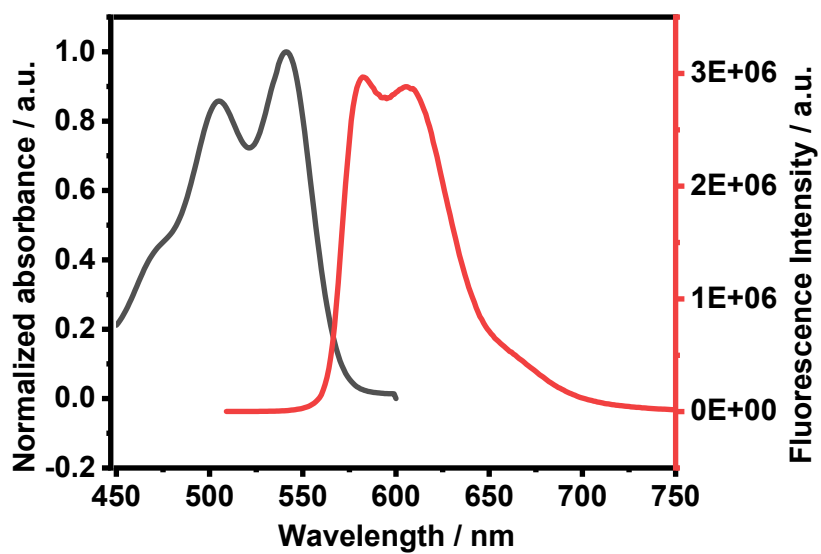

Figure S15. UV-visible absorption spectrum and fluorescence spectrum of 11

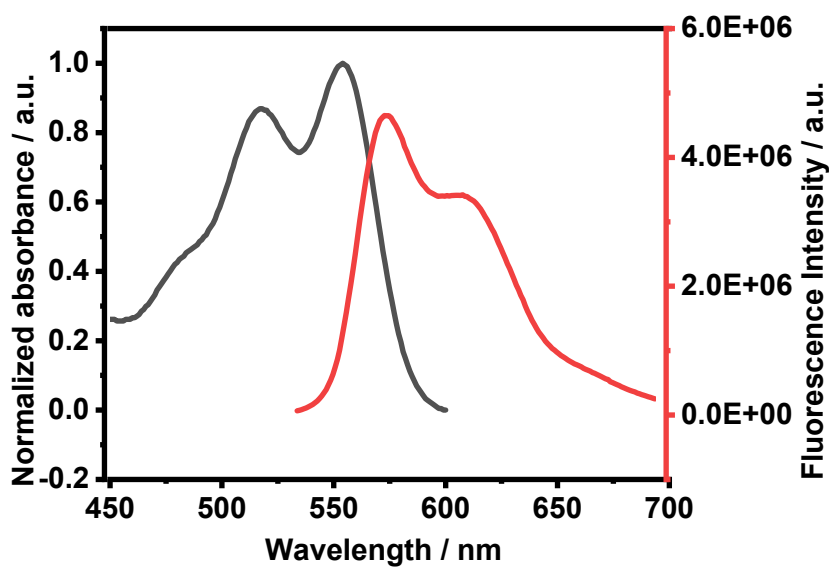

Figure S16. UV-visible absorption spectrum and fluorescence spectrum of 12

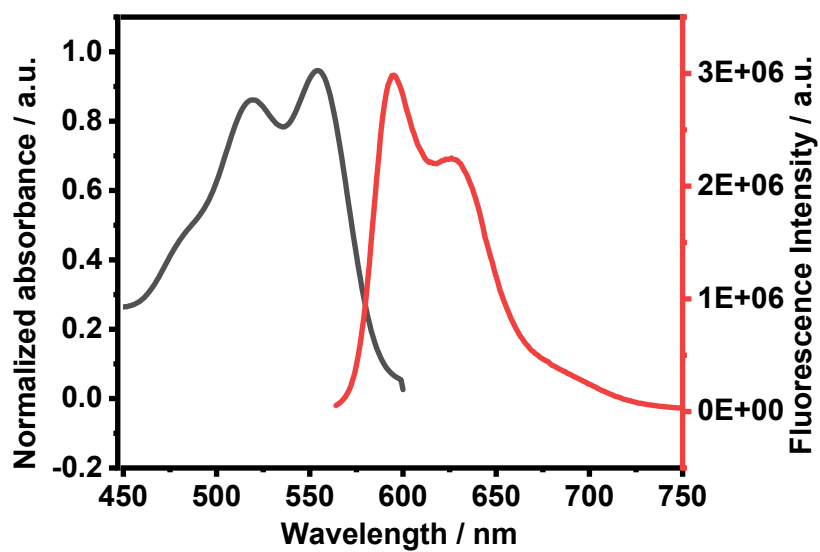

Figure S17. UV-visible absorption spectrum and fluorescence spectrum of 13

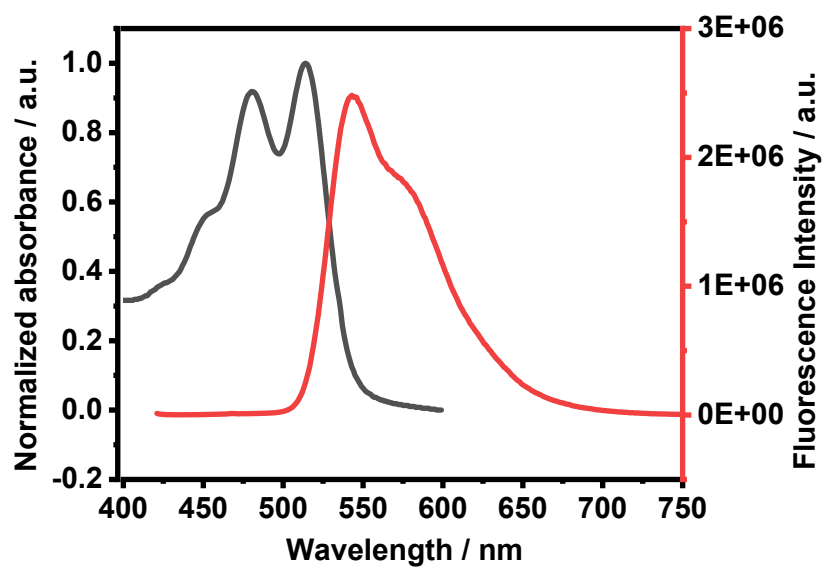

Figure S18. UV-visible absorption spectrum and fluorescence spectrum of 14

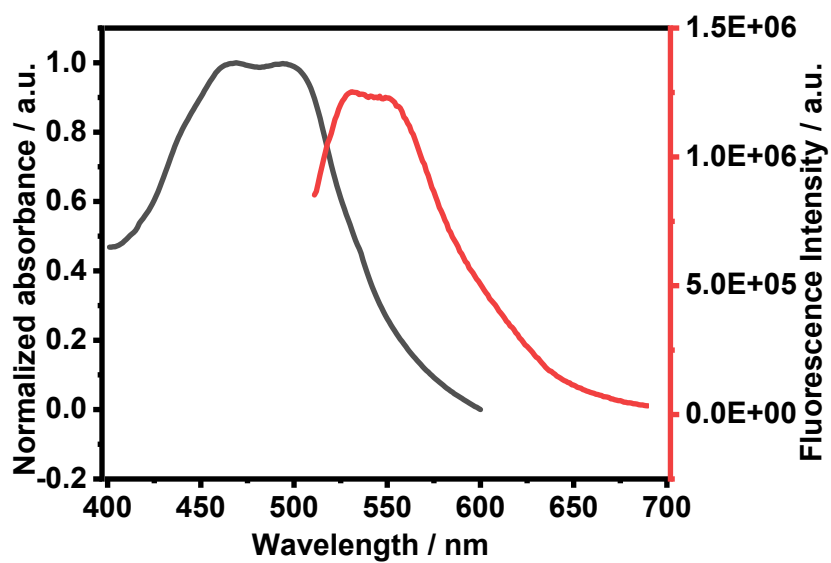

Figure S19. UV-visible absorption spectrum and fluorescence spectrum of 15

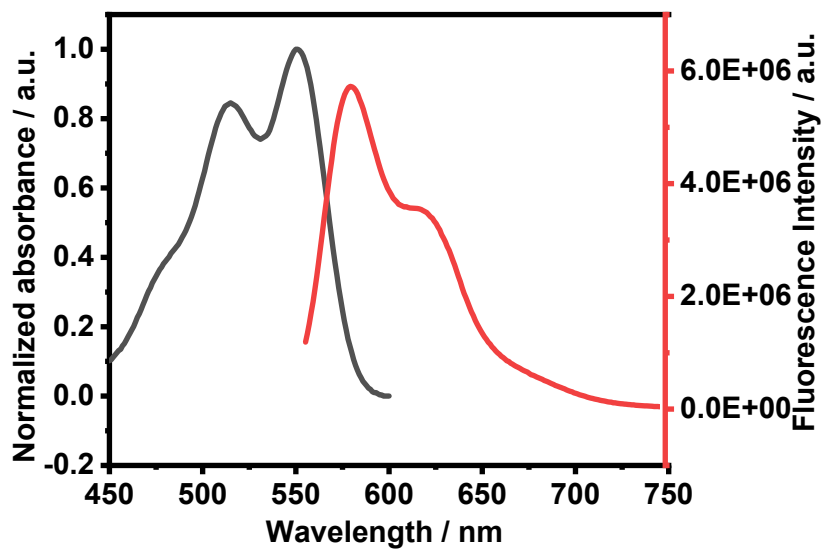

Figure S20. UV-visible absorption spectrum and fluorescence spectrum of 16

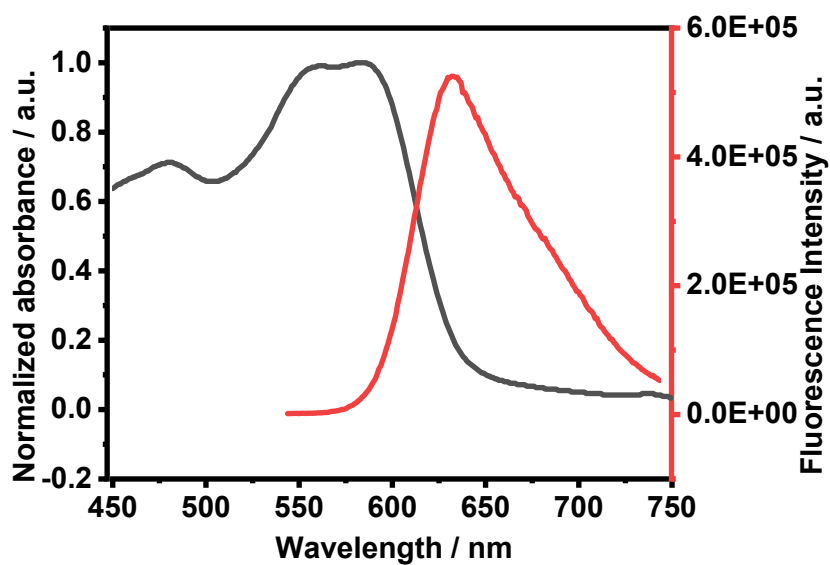

Figure S21. UV-visible absorption spectrum and fluorescence spectrum of 17

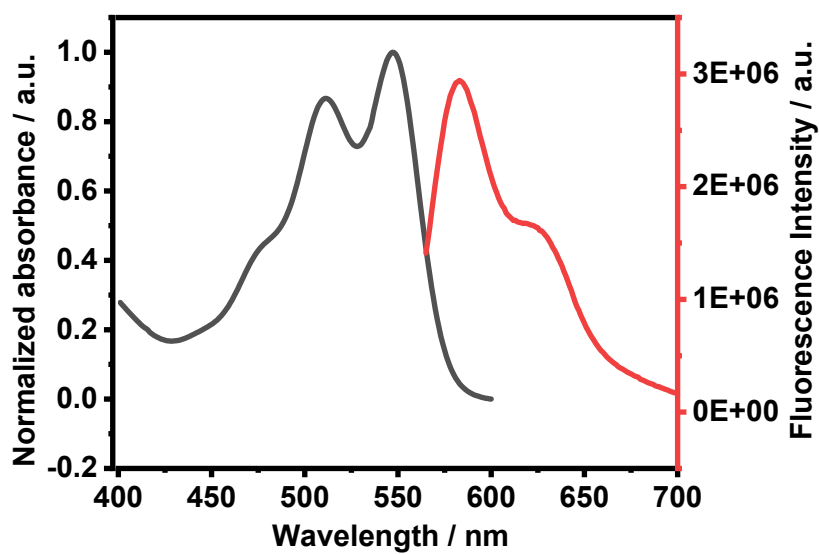

Figure S22. UV-visible absorption spectrum and fluorescence spectrum of 18

## Spectrum of molar absorption coefficient of compound 1, 5, 8.

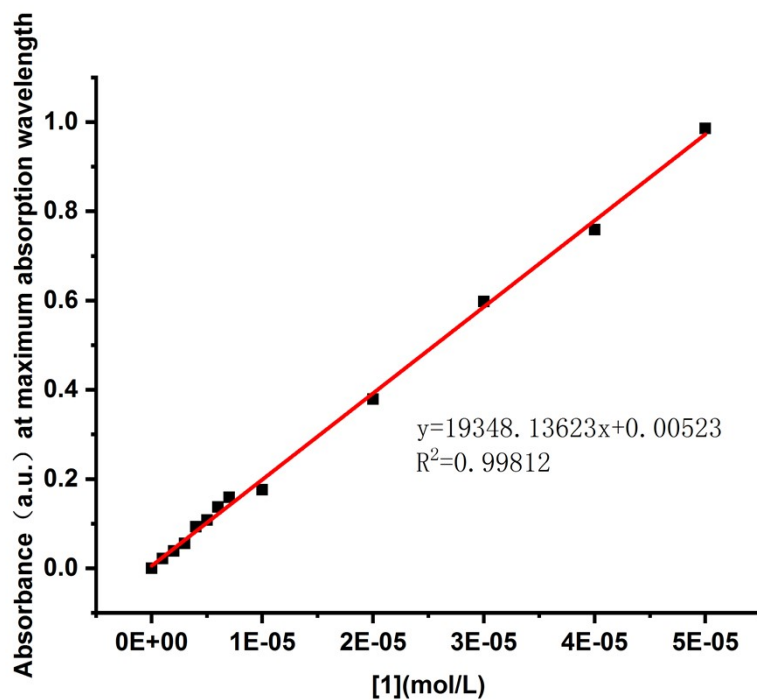

Figure S23. Molar absorption coefficient of 1.

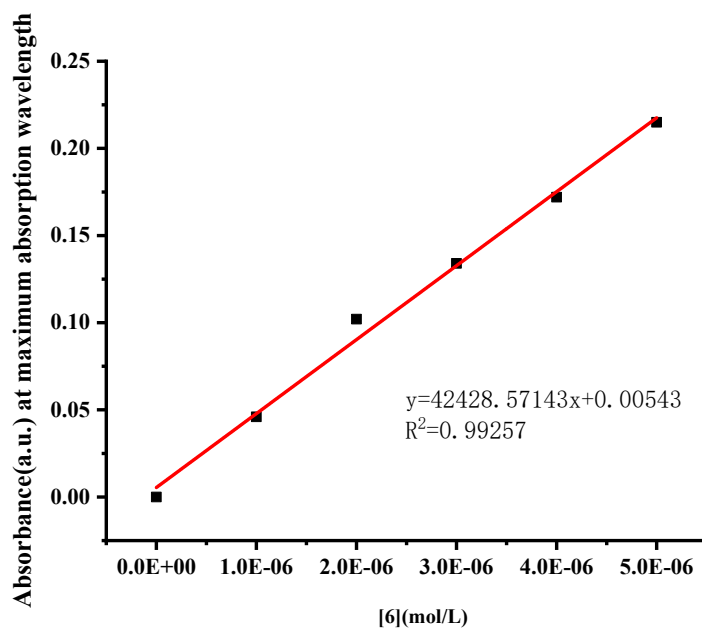

Figure S24. Molar absorption coefficient of 6.



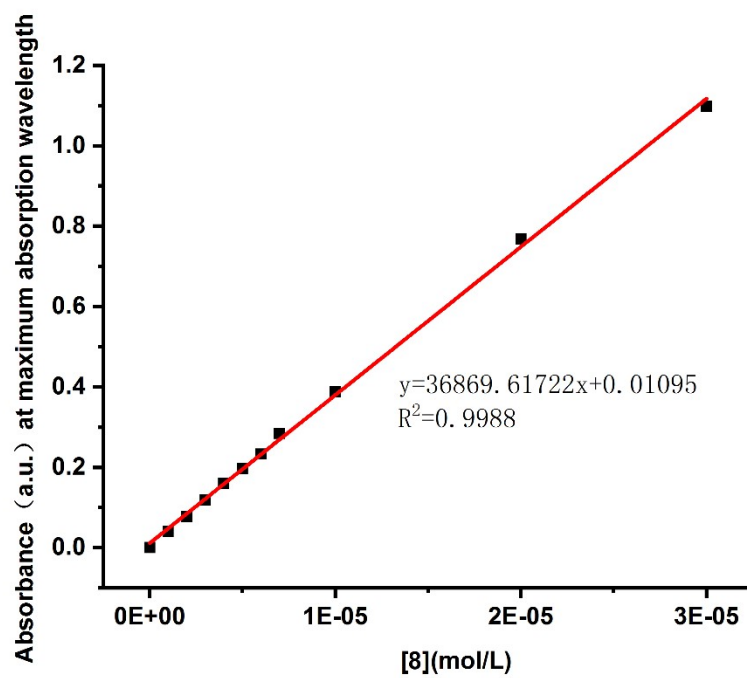

Figure S25. Molar absorption coefficient of **8**.

## Photostability experiments

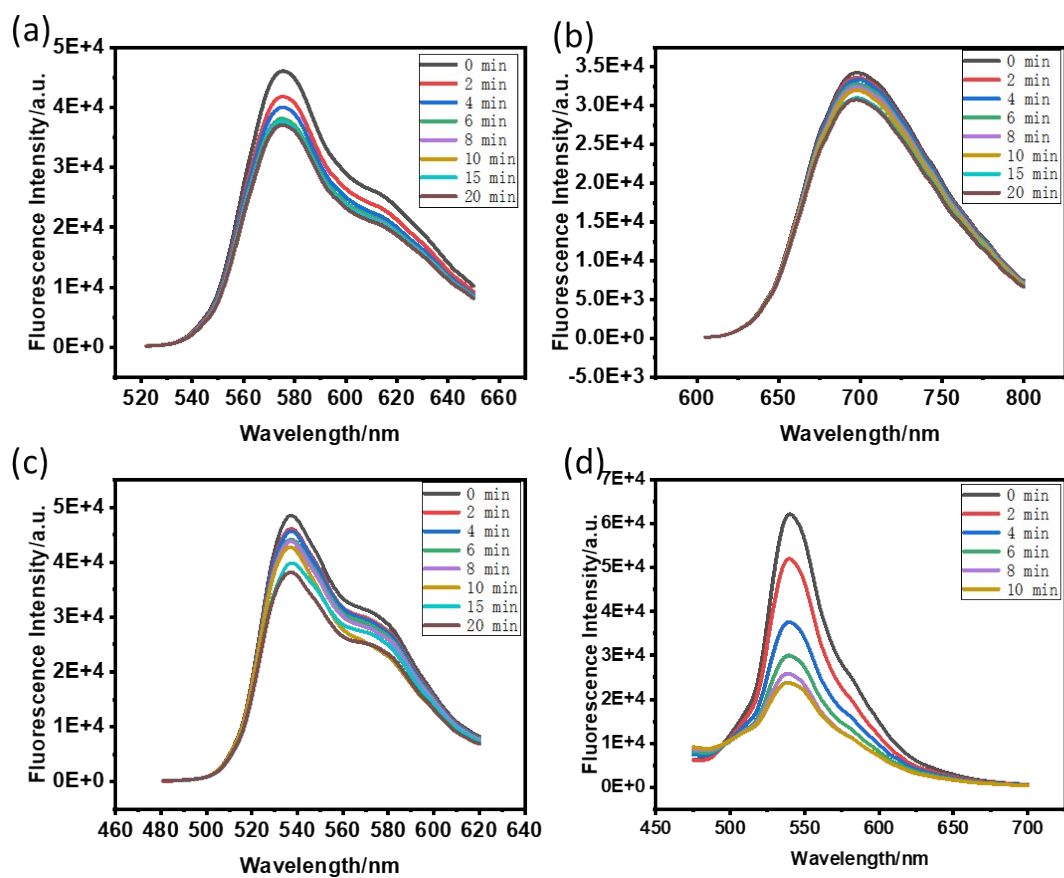

**Figure S26.** Changes of the fluorescence spectrum of **1** (a) solution in DMSO (10  $\mu$ M), **6** (b) solution in DMSO (10  $\mu$ M), **8** (c) solution in DMSO (10  $\mu$ M) and fluorescein (d) solution in DMSO (10  $\mu$ M) with  $K_2CO_3$  (20  $\mu$ M), under the continuous irradiation by a 532 nm laser line (200  $mW/cm^2$ ).

# Cell experiments

## Materials and Methods

### Cell lines

L929 cell: Mouse fibroblast cells.

### Cell culture

Cells were grown in 5% (vol/vol) CO<sub>2</sub> at 37°C. Cells were cultured in DMEM medium (penicillin (100 U/mL) and streptomycin (100 µg/mL)).

### Toxicity experiment

The L929 cells were digested with trypsin to prepare a suspension and then these cells were spread into a 96-well plate. The experiment was divided into three groups, including control group (with cells and CCK-8 solution, without probes), experimental group (with cells, CCK-8 solution and probes), and blank group (with culture medium and CCK-8 solution, without cells and probes). The number of cells in each well was  $5 \times 10^3$ , and the medium in per well was 200 µL. Cells were cultured for 24 h until cells adhered to the wall firmly. Different concentrations (1, 2, 4, 8, 10 and 15 µM) of compound **1**, **6** and **8** were added to each well. After incubating for 60 minutes, 20 µL of CCK-8 solution was added to each well, cells were incubated in incubator for 3 hours. The solution mixed gently on a shaker, put plate in a microplate reader and measured the absorbance at 450 nm wavelength, the detection wavelength was 450-490 nm, the reference wavelength is 600-625 nm. The experimental repeat 4 times. Cell viability calculate:  $\text{cell viability (\%)} = \frac{[A_{\text{experimental group}} - A_{\text{blank group}}]}{[A_{\text{control group}} - A_{\text{blank group}}]} * 100\%$

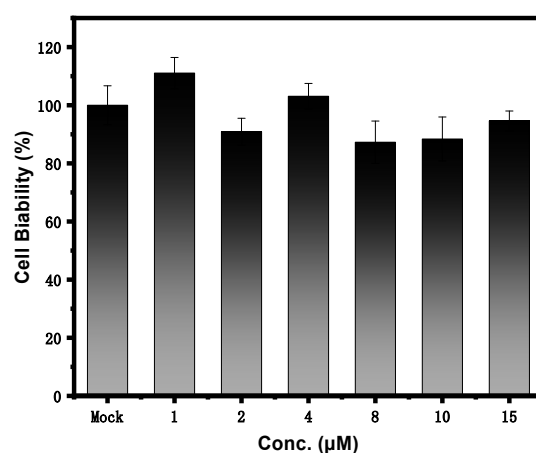

Figure S27. Cell viability of **1** in L929 cell.

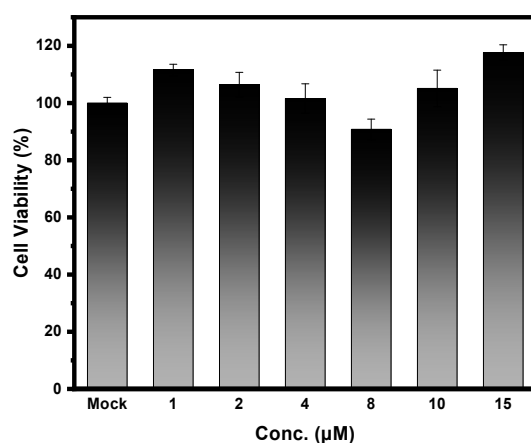

**Figure S28.** Cell viability of **6** in L929 cell.

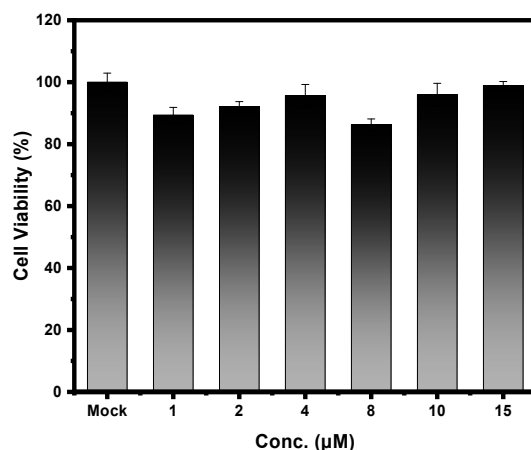

**Figure S29.** Cell viability of **8** in L929 cell.

## Cell Culture and Imaging by Laser Scanning Microscopy

For single-photon living cell imaging, we cultured cells on 15 mm class bottom cell culture dish (Nest). Before labelling cells with probes, we removed the culture medium, and washed the cells twice with Hank's Balanced Salt Solution (HBSS, 1.26 mM  $\text{CaCl}_2$ , 0.49 mM  $\text{MgCl}_2$ , 0.41 mM  $\text{MgSO}_4$ , 5.33 mM  $\text{KCl}$ , 0.44 mM  $\text{KH}_2\text{PO}_4$ , 4.17 mM  $\text{NaHCO}_3$ , 138 mM  $\text{NaCl}$ , 0.34 mM  $\text{Na}_2\text{HPO}_4$ , 5.55 mM Glucose, pH = 7.4) to remove away the residual culture medium. 200  $\mu\text{L}$  probes (10  $\mu\text{M}$ ) were added to the dish, and incubated with cells for 30 mins in the dark. Cells was washed twice with Hank's Balanced Salt Solution to remove residual probes. 1 mL Hank's solution was added to the dish, cells were observed in an objective with a magnification of 20 $\times$ , 40 $\times$  and 100 $\times$ . The excitation wavelengths are  $405 \pm 20$  nm and  $565 \pm 20$  nm, and the emission wavelengths are  $501 \pm 20$  nm and  $580 \pm 20$  nm. (LSM 780 Zeiss, Germany)

For two-photon living cell imaging, we cultured cells on 6 cm cell culture dish. Before labelling cells with probes, cells were washed twice with Hank's Balanced Salt Solution. 2 mL aqueous solution of probes (10  $\mu$ M) were added to the dish, and incubated with cells for 30 mins in the dark. Cells was washed twice with Hank's Balanced Salt Solution to remove residual probes. 7 mL Hank's solution was added to the dish, cells were observed in an objective. The two-photon microscopic imaging system contains an inverted commercial laser scanning microscopic imaging system (LSM 880 Zeiss, Germany) and a mode-locked femtosecond Ti: Sapphire laser which emitted linearly polarized 810 nm excitation light. The backscattered signals from tissue samples were simultaneously obtained via two independent channels. One channel detected signal (green color) between 449 nm and 511 nm, and the other detected signal (red color) between 623 nm and 660 nm. A Zeiss 40 $\times$ /W Plan-Apochromat water immersion objective was employed to acquire images.

## Living cell imaging

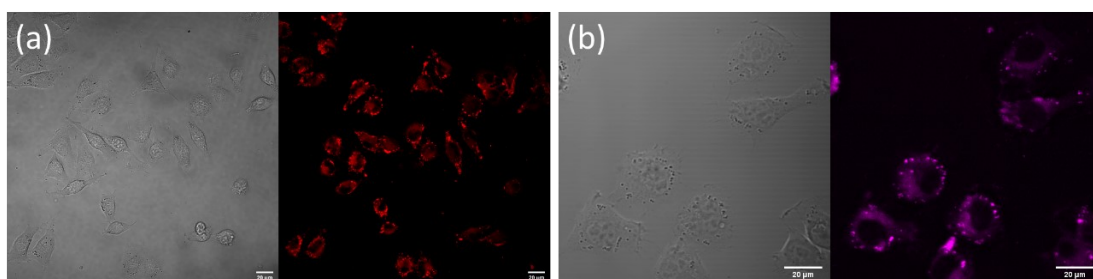

**Figure S30.** Living cell imaging of **6** in L929 cell: (a) Bright field and red channel (ex. 543 nm, em. 550-600 nm). (b) Bright field and red channel (2P, ex.810 nm, em. 550-600 nm).

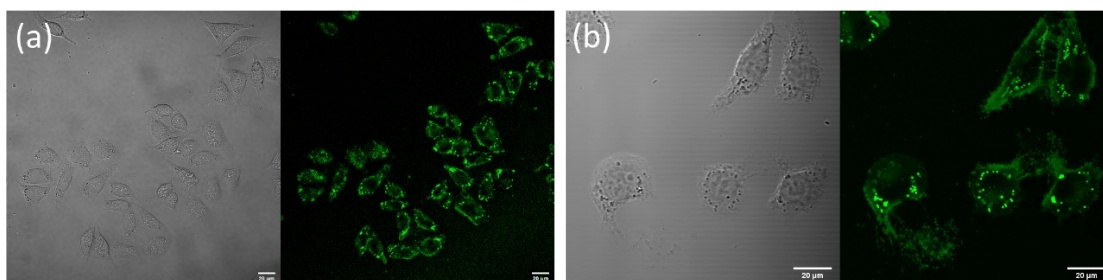

**Figure S31.** Living cell imaging of **8** in L929 cell: (a) Bright field and green channel (ex. 488 nm, em. 500-540 nm). (b) Bright field and green channel (2P, ex.810 nm, em. 500-540 nm).

## Single crystal data

X-ray diffractions for single crystals of **1**, **3**, **8** and **11** were carried out on Rigaku Synergy Custom (Liquid MetalJet D2 Plus) diffractometer using Ga K $\alpha$  radiation ( $\lambda = 1.3405 \text{ \AA}$ ). Data collection and unit cell refinement were executed by using CrysAlisPro software. Data processing and absorption correction, giving minimum and maximum transmission factors, were accomplished with CrysAlisPro. The structure was solved with the SHELXT and refined with the SHELXL using least-squares minimization. All non-hydrogen atoms were refined with anisotropic displacement parameters. All carbon bound hydrogen atom positions were determined by geometry and refined by a riding model. CCDC 2128126, 2128125, 2128123, 2128124 contain the supplementary crystallographic data. Crystal data and structure refinements of **1**, **3**, **8** and **11** are listed in **Table S3**, **Table S4**, **Table S5** and **Table S6**. These data can be obtained free of charge from the Cambridge Crystallographic Data Centre via <https://www.ccdc.cam.ac.uk/>

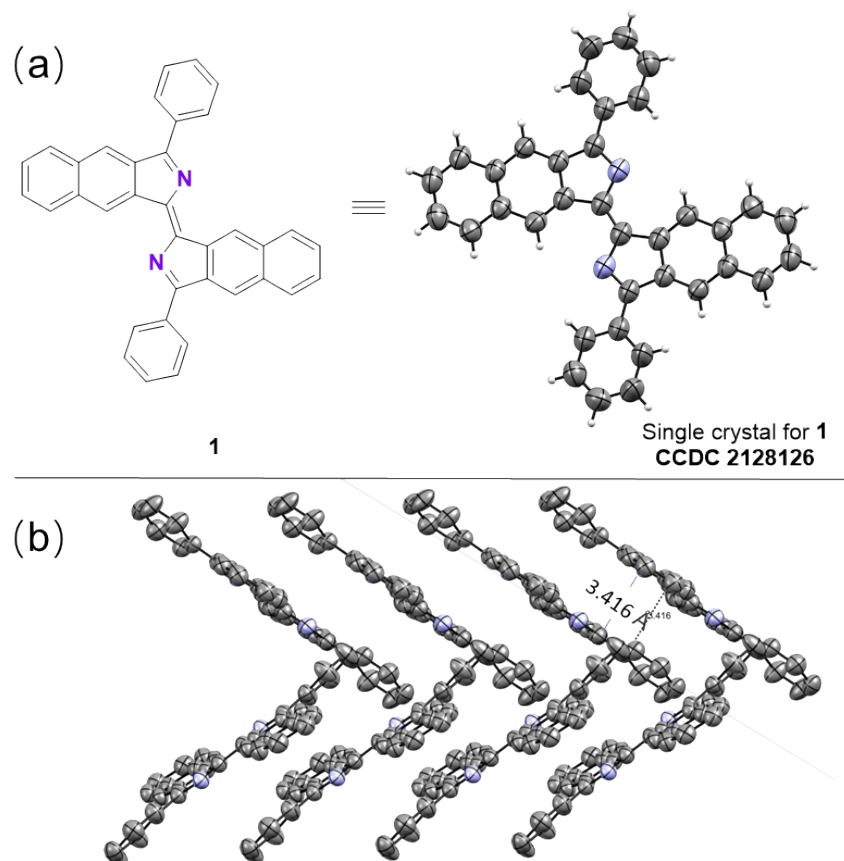

**Figure S32.** (a) Single-crystal structures of **1**. (b) Molecular packing. Hydrogen atoms are omitted for clarity.

**Table S5.** Crystal data and structure refinement for **1**

|                     |                                                |
|---------------------|------------------------------------------------|
| Identification code | <b>1</b>                                       |
| Empirical formula   | C <sub>36</sub> H <sub>22</sub> N <sub>2</sub> |
| Formula weight      | 482.55                                         |

|                                             |                                                               |
|---------------------------------------------|---------------------------------------------------------------|
| Temperature/K                               | 299.22(19)                                                    |
| Crystal system                              | monoclinic                                                    |
| Space group                                 | P2 <sub>1</sub> /n                                            |
| a/Å                                         | 12.4695(8)                                                    |
| b/Å                                         | 5.8013(3)                                                     |
| c/Å                                         | 17.3780(10)                                                   |
| α/°                                         | 90                                                            |
| β/°                                         | 101.414(6)                                                    |
| γ/°                                         | 90                                                            |
| Volume/Å <sup>3</sup>                       | 1232.25(13)                                                   |
| Z                                           | 2                                                             |
| ρ <sub>calc</sub> /g/cm <sup>3</sup>        | 1.301                                                         |
| μ/mm <sup>-1</sup>                          | 0.375                                                         |
| F(000)                                      | 504.0                                                         |
| Crystal size/mm <sup>3</sup>                | 0.2 × 0.1 × 0.05                                              |
| Radiation                                   | GaKα (λ = 1.3405)                                             |
| 2θ range for data collection/°              | 6.976 to 121.09                                               |
| Index ranges                                | -16 ≤ h ≤ 16, -3 ≤ k ≤ 7, -22 ≤ l ≤ 22                        |
| Reflections collected                       | 9039                                                          |
| Independent reflections                     | 2730 [R <sub>int</sub> = 0.0691, R <sub>sigma</sub> = 0.0603] |
| Data/restraints/parameters                  | 2730/36/172                                                   |
| Goodness-of-fit on F <sup>2</sup>           | 1.015                                                         |
| Final R indexes [I ≥ 2σ (I)]                | R <sub>1</sub> = 0.0617, wR <sub>2</sub> = 0.1756             |
| Final R indexes [all data]                  | R <sub>1</sub> = 0.0937, wR <sub>2</sub> = 0.2001             |
| Largest diff. peak/hole / e Å <sup>-3</sup> | 0.22/-0.18                                                    |

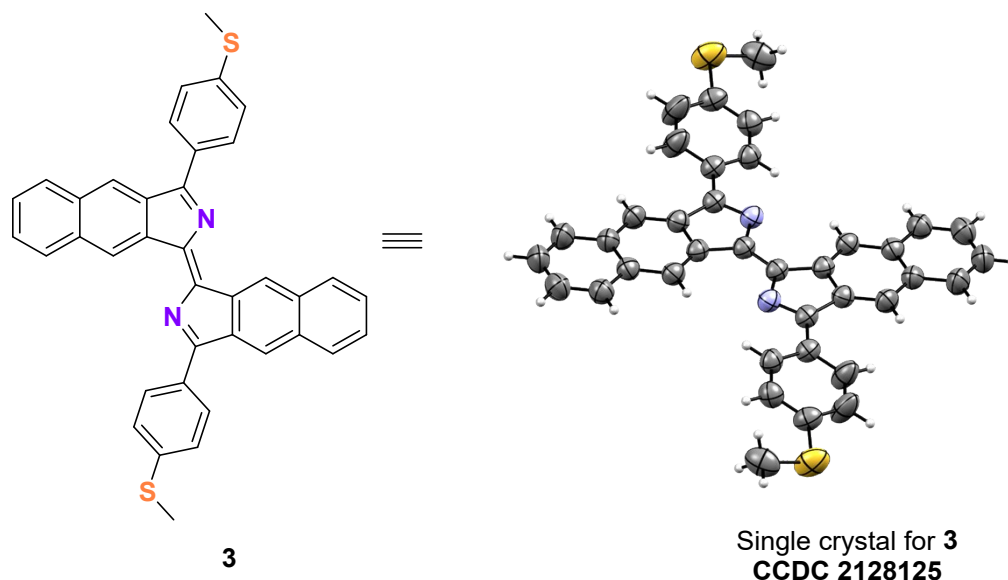

**Figure S33.** Single-crystal structures of **3**.

**Table S6.** Crystal data and structure refinement for **3**

|                     |                                    |
|---------------------|------------------------------------|
| Identification code | <b>3</b>                           |
| Empirical formula   | C <sub>19</sub> H <sub>13</sub> NS |
| Formula weight      | 287.36                             |
| Temperature/K       | 99.99(10)                          |

|                                               |                                                               |
|-----------------------------------------------|---------------------------------------------------------------|
| Crystal system                                | monoclinic                                                    |
| Space group                                   | $P2_1/n$                                                      |
| $a/\text{\AA}$                                | 11.8893(9)                                                    |
| $b/\text{\AA}$                                | 6.3212(5)                                                     |
| $c/\text{\AA}$                                | 18.6664(15)                                                   |
| $\alpha/^\circ$                               | 90                                                            |
| $\beta/^\circ$                                | 92.734(7)                                                     |
| $\gamma/^\circ$                               | 90                                                            |
| Volume/ $\text{\AA}^3$                        | 1401.27(19)                                                   |
| Z                                             | 4                                                             |
| $\rho_{\text{calc}}/\text{g/cm}^3$            | 1.362                                                         |
| $\mu/\text{mm}^{-1}$                          | 1.284                                                         |
| F(000)                                        | 600.0                                                         |
| Crystal size/ $\text{mm}^3$                   | $0.05 \times 0.03 \times 0.02$                                |
| Radiation                                     | Ga $K\alpha$ ( $\lambda = 1.3405$ )                           |
| $2\theta$ range for data collection/ $^\circ$ | 7.506 to 121.564                                              |
| Index ranges                                  | $-15 \leq h \leq 13, -8 \leq k \leq 6, -24 \leq l \leq 24$    |
| Reflections collected                         | 17389                                                         |
| Independent reflections                       | 3194 [ $R_{\text{int}} = 0.0362, R_{\text{sigma}} = 0.0276$ ] |
| Data/restraints/parameters                    | 3194/0/191                                                    |
| Goodness-of-fit on $F^2$                      | 1.086                                                         |
| Final R indexes [ $I \geq 2\sigma(I)$ ]       | $R_1 = 0.0415, wR_2 = 0.1082$                                 |
| Final R indexes [all data]                    | $R_1 = 0.0547, wR_2 = 0.1151$                                 |
| Largest diff. peak/hole / $e \text{\AA}^{-3}$ | 0.17/-0.38                                                    |

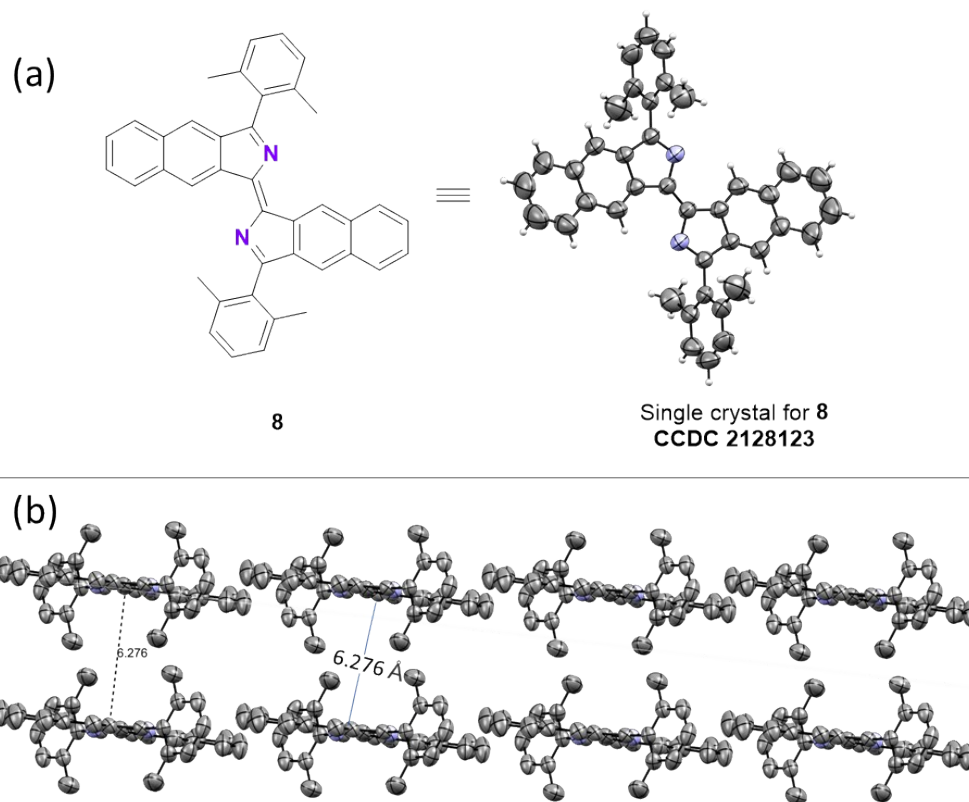

**Figure S34.** (a) Single-crystal structures of **8**. (b) Molecular packing. Hydrogen atoms are omitted for clarity.



**Table S7.** Crystal data and structure refinement for **8**

|                                             |                                                               |
|---------------------------------------------|---------------------------------------------------------------|
| Identification code                         | <b>8</b>                                                      |
| Empirical formula                           | C <sub>40</sub> H <sub>30</sub> N <sub>2</sub>                |
| Formula weight                              | 269.349                                                       |
| Temperature/K                               | 99.99(10)                                                     |
| Crystal system                              | triclinic                                                     |
| Space group                                 | P-1                                                           |
| a/Å                                         | 8.9783(6)                                                     |
| b/Å                                         | 11.2080(6)                                                    |
| c/Å                                         | 15.2381(6)                                                    |
| α/°                                         | 91.733(4)                                                     |
| β/°                                         | 97.302(5)                                                     |
| γ/°                                         | 97.178(5)                                                     |
| Volume/Å <sup>3</sup>                       | 1507.38(14)                                                   |
| Z                                           | 4                                                             |
| ρ <sub>calc</sub> /cm <sup>3</sup>          | 1.187                                                         |
| μ/mm <sup>-1</sup>                          | 0.335                                                         |
| F(000)                                      | 569.1                                                         |
| Crystal size/mm <sup>3</sup>                | 0.05 × 0.03 × 0.02                                            |
| Radiation                                   | Ga Kα (λ = 1.3405)                                            |
| 2θ range for data collection/°              | 5.08 to 103.86                                                |
| Index ranges                                | -10 ≤ h ≤ 10, -13 ≤ k ≤ 13, -17 ≤ l ≤ 17                      |
| Reflections collected                       | 13849                                                         |
| Independent reflections                     | 5021 [R <sub>int</sub> = 0.0457, R <sub>sigma</sub> = 0.0441] |
| Data/restraints/parameters                  | 5021/66/383                                                   |
| Goodness-of-fit on F <sup>2</sup>           | 1.012                                                         |
| Final R indexes [I ≥ 2σ (I)]                | R <sub>1</sub> = 0.0562, wR <sub>2</sub> = 0.1562             |
| Final R indexes [all data]                  | R <sub>1</sub> = 0.0765, wR <sub>2</sub> = 0.1754             |
| Largest diff. peak/hole / e Å <sup>-3</sup> | 0.28/-0.35                                                    |

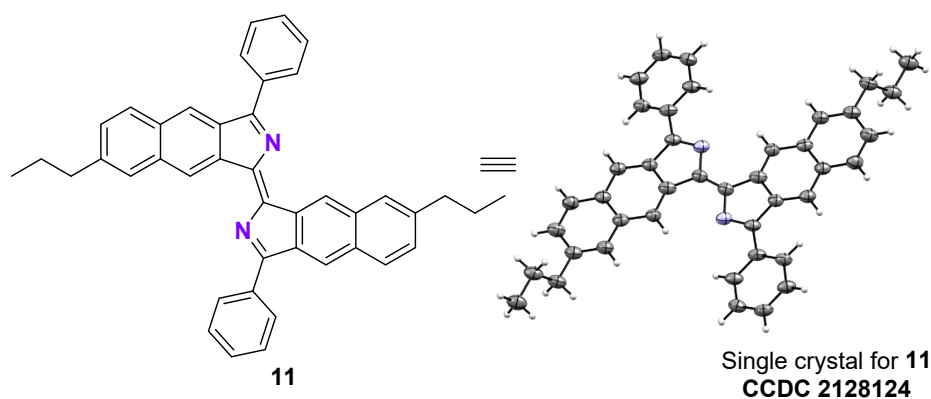**Figure S35.** Single-crystal structures of **11**.**Table S8.** Crystal data and structure refinement for **11**.

|                     |                                                |
|---------------------|------------------------------------------------|
| Identification code | <b>11</b>                                      |
| Empirical formula   | C <sub>42</sub> H <sub>34</sub> N <sub>2</sub> |
| Formula weight      | 566.71                                         |
| Temperature/K       | 99.98(10)                                      |
| Crystal system      | monoclinic                                     |

|                                             |                                                               |
|---------------------------------------------|---------------------------------------------------------------|
| Space group                                 | P2 <sub>1</sub> /n                                            |
| a/Å                                         | 12.7024(8)                                                    |
| b/Å                                         | 4.9027(3)                                                     |
| c/Å                                         | 23.7070(16)                                                   |
| α/°                                         | 90                                                            |
| β/°                                         | 93.671(7)                                                     |
| γ/°                                         | 90                                                            |
| Volume/Å <sup>3</sup>                       | 1473.35(16)                                                   |
| Z                                           | 2                                                             |
| ρ <sub>calc</sub> /cm <sup>3</sup>          | 1.277                                                         |
| μ/mm <sup>-1</sup>                          | 0.358                                                         |
| F(000)                                      | 600.0                                                         |
| Crystal size/mm <sup>3</sup>                | 0.3 × 0.23 × 0.21                                             |
| Radiation                                   | Ga Kα (λ = 1.3405)                                            |
| 2θ range for data collection/°              | 6.496 to 121.11                                               |
| Index ranges                                | -16 ≤ h ≤ 16, -6 ≤ k ≤ 6, -29 ≤ l ≤ 30                        |
| Reflections collected                       | 9723                                                          |
| Independent reflections                     | 3254 [R <sub>int</sub> = 0.0307, R <sub>sigma</sub> = 0.0350] |
| Data/restraints/parameters                  | 3254/0/201                                                    |
| Goodness-of-fit on F <sup>2</sup>           | 1.158                                                         |
| Final R indexes [I ≥ 2σ (I)]                | R <sub>1</sub> = 0.0756, wR <sub>2</sub> = 0.2215             |
| Final R indexes [all data]                  | R <sub>1</sub> = 0.0946, wR <sub>2</sub> = 0.2695             |
| Largest diff. peak/hole / e Å <sup>-3</sup> | 0.42/-0.65                                                    |

# NMR spectra

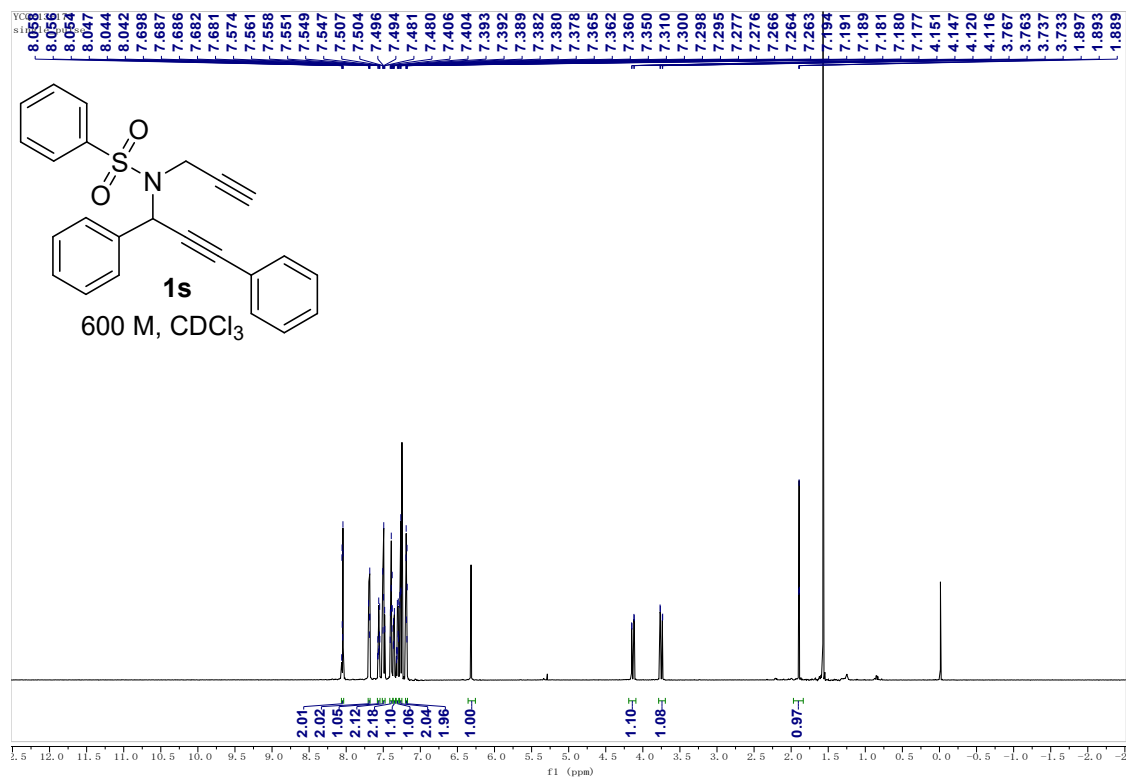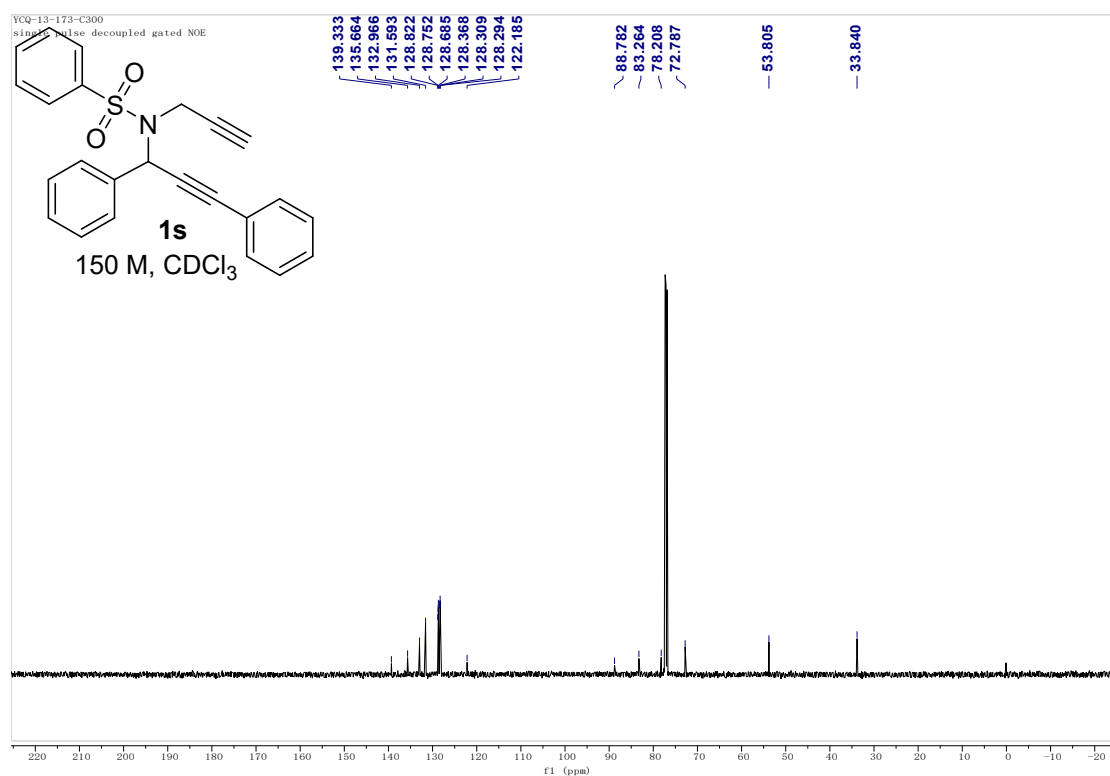

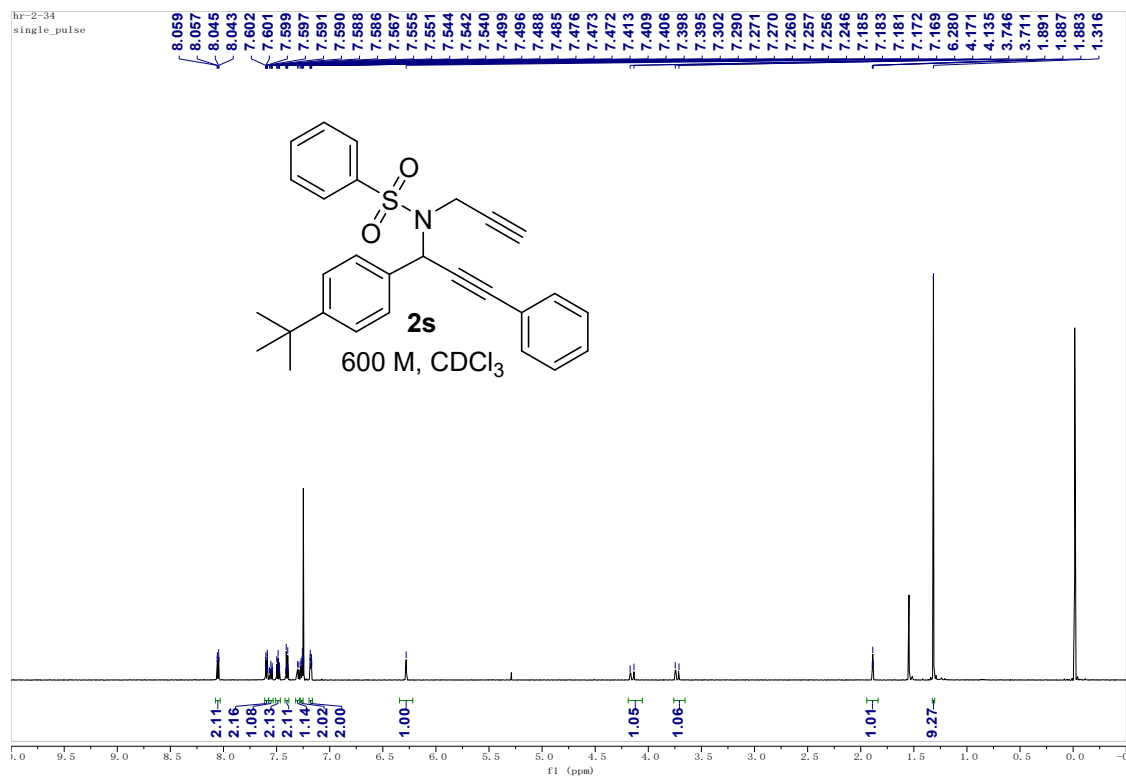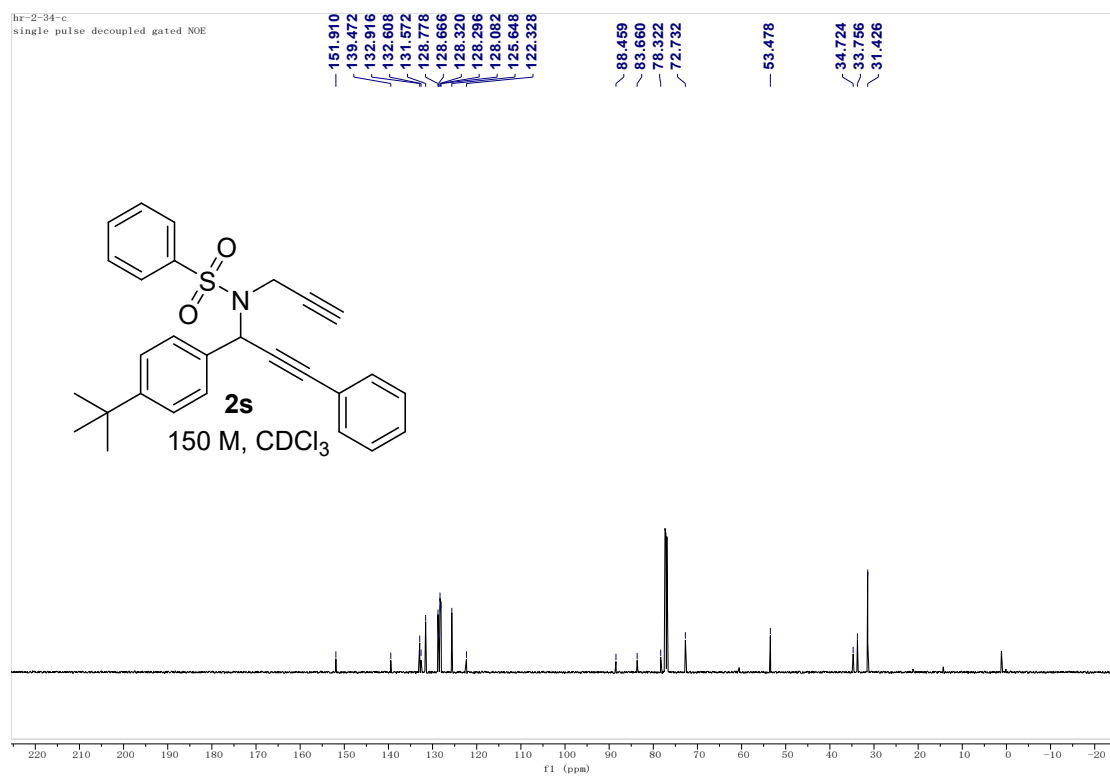

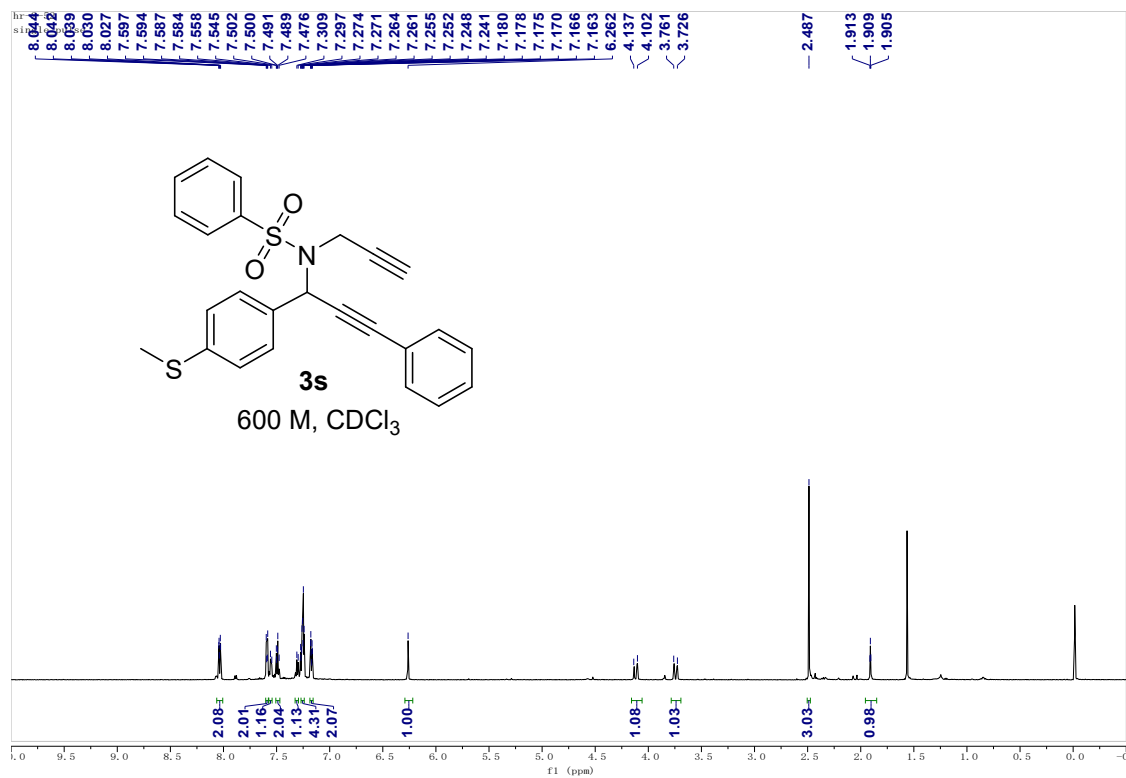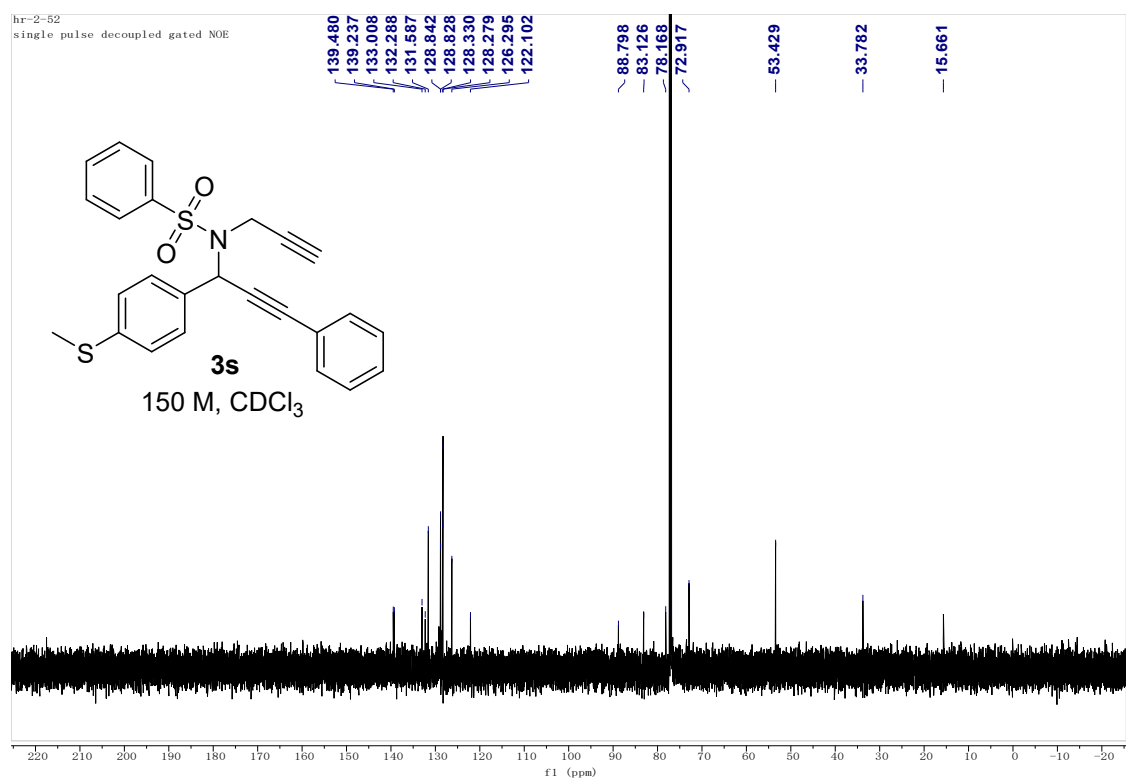

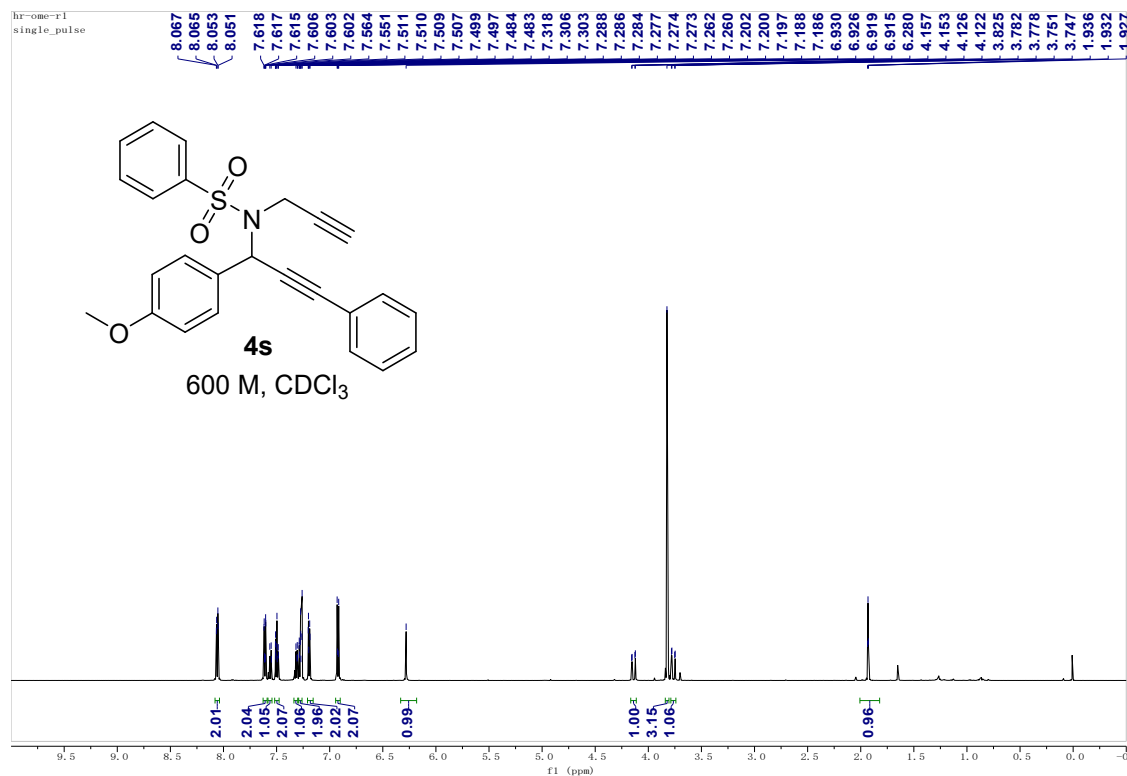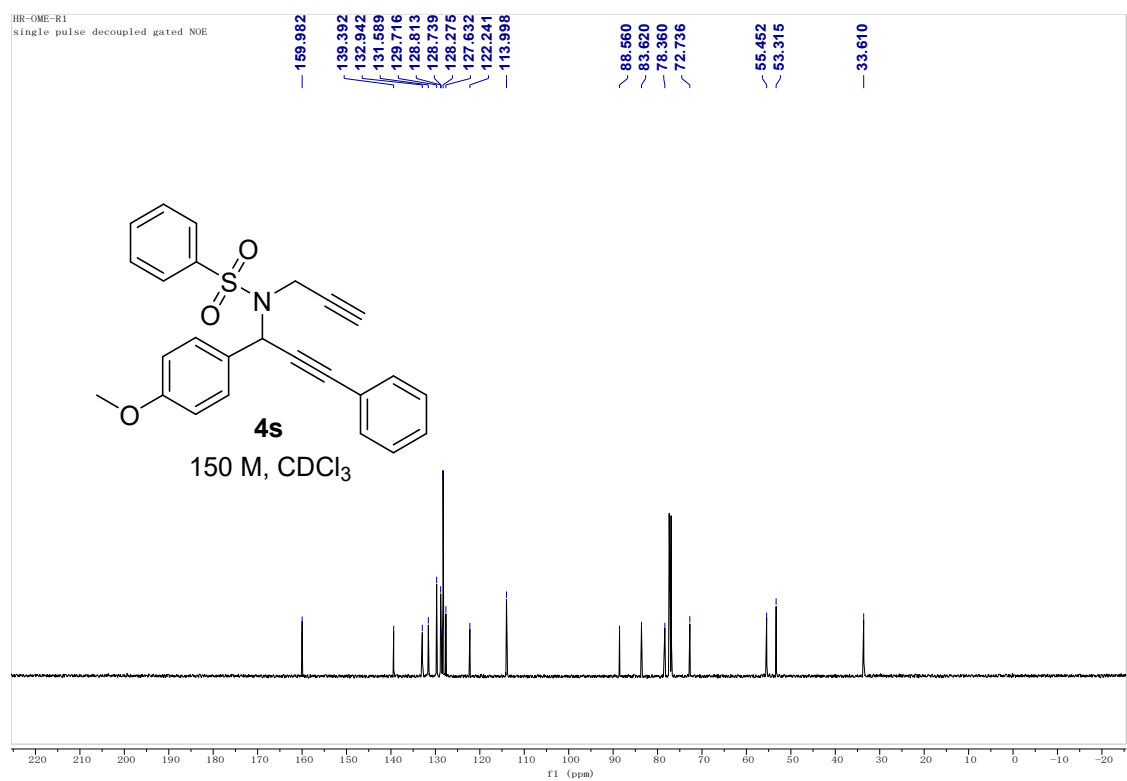

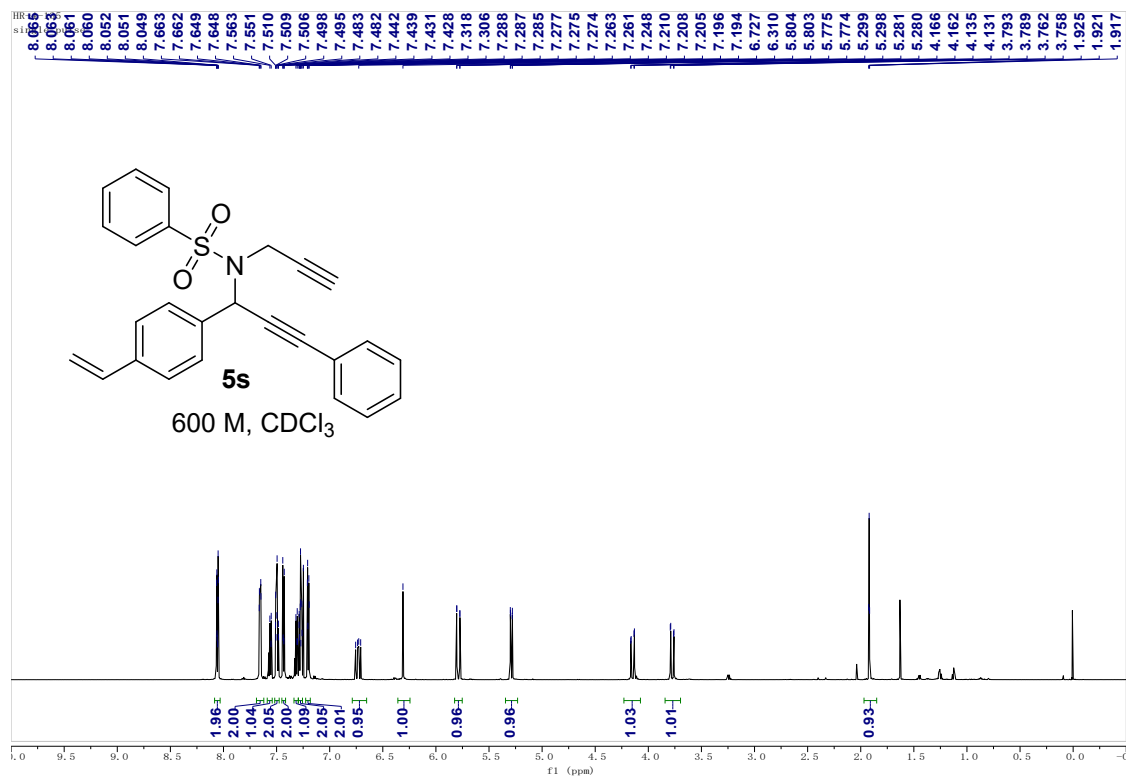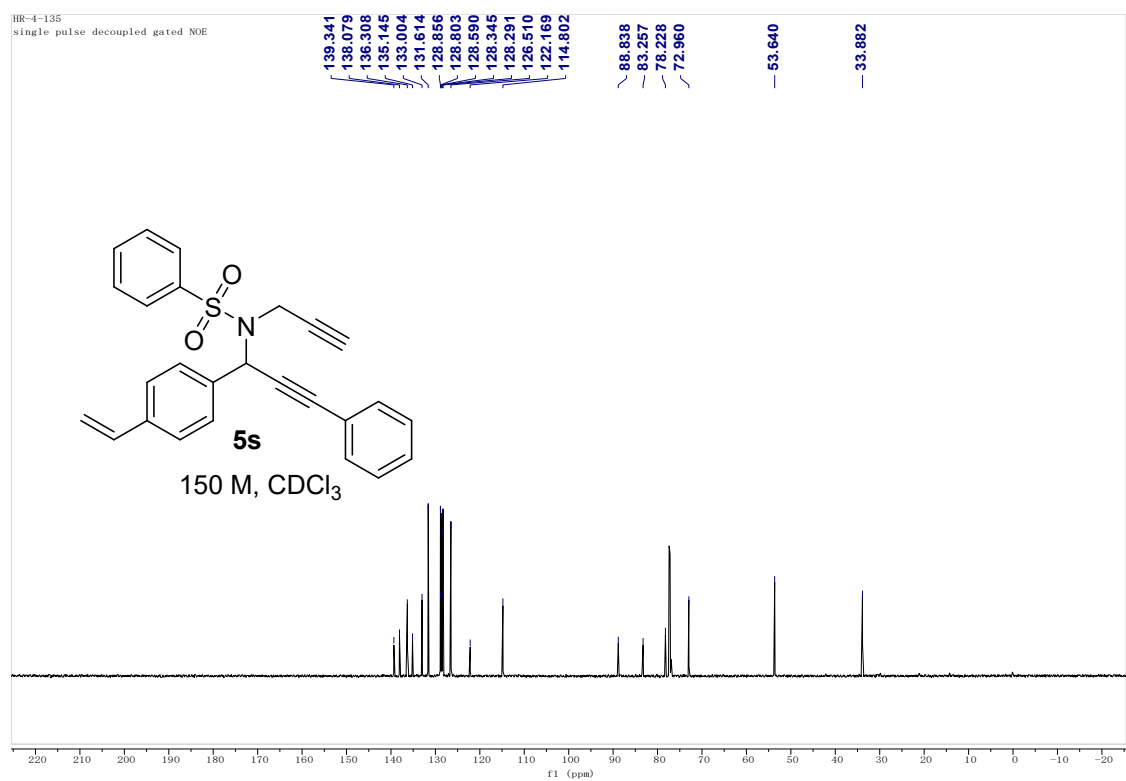

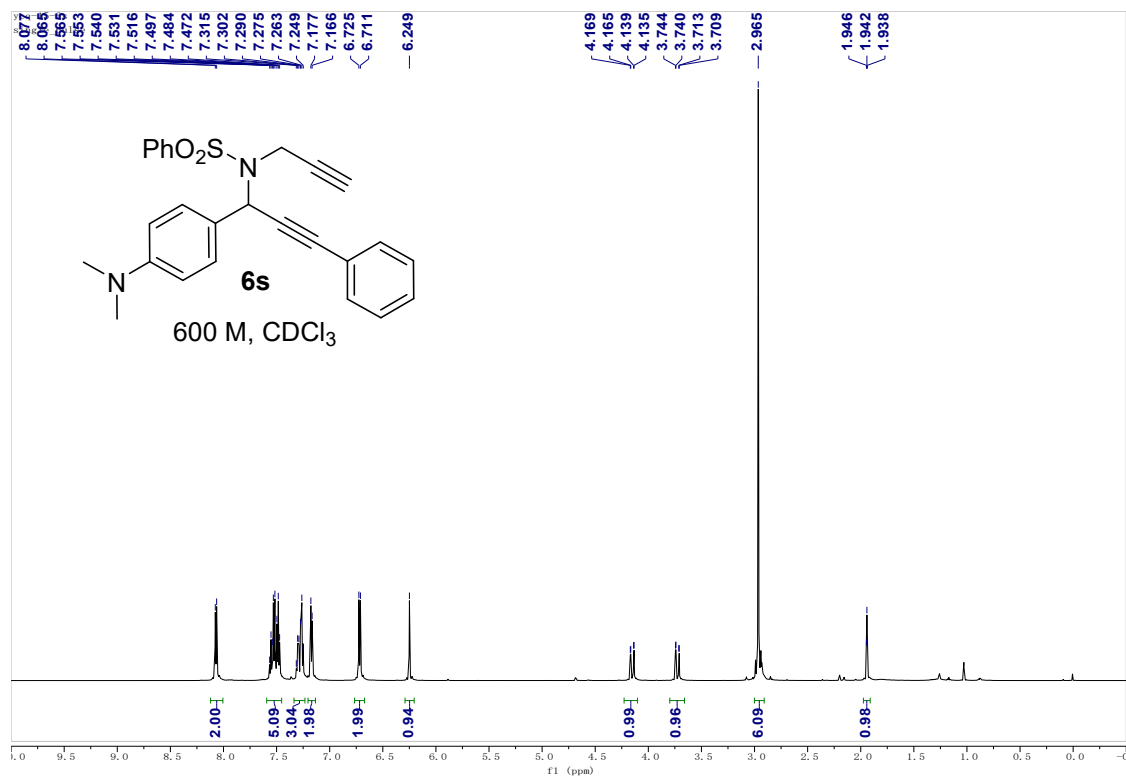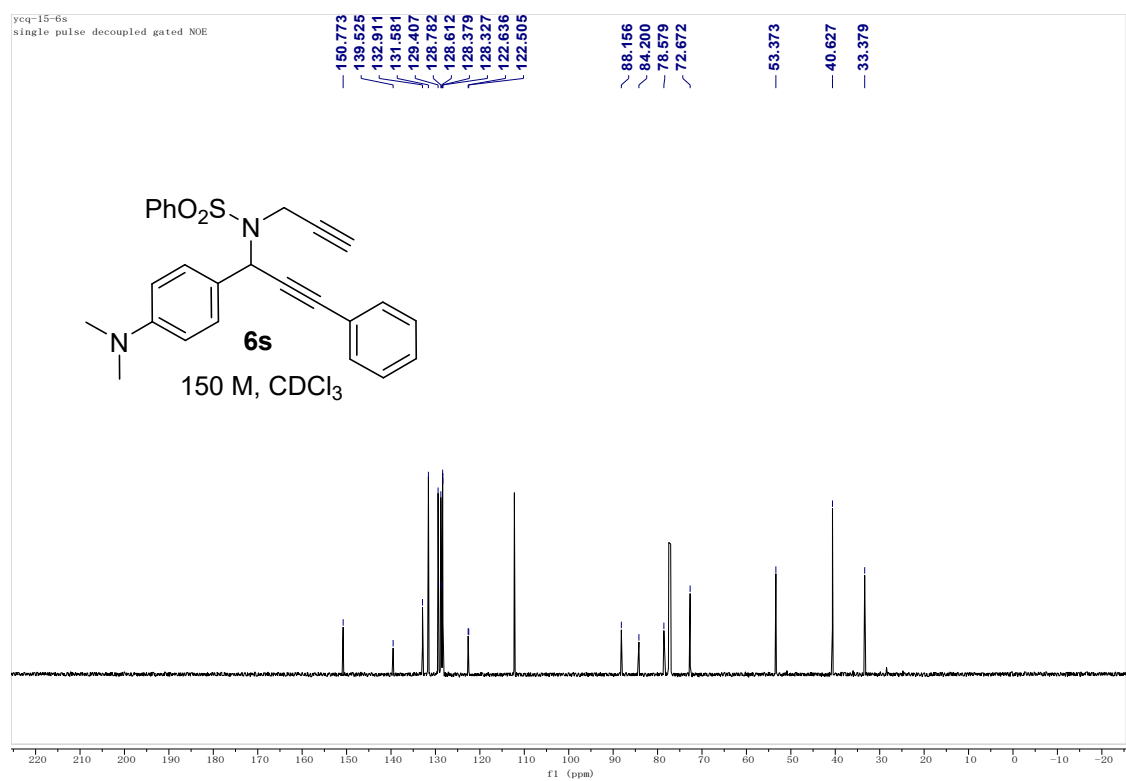



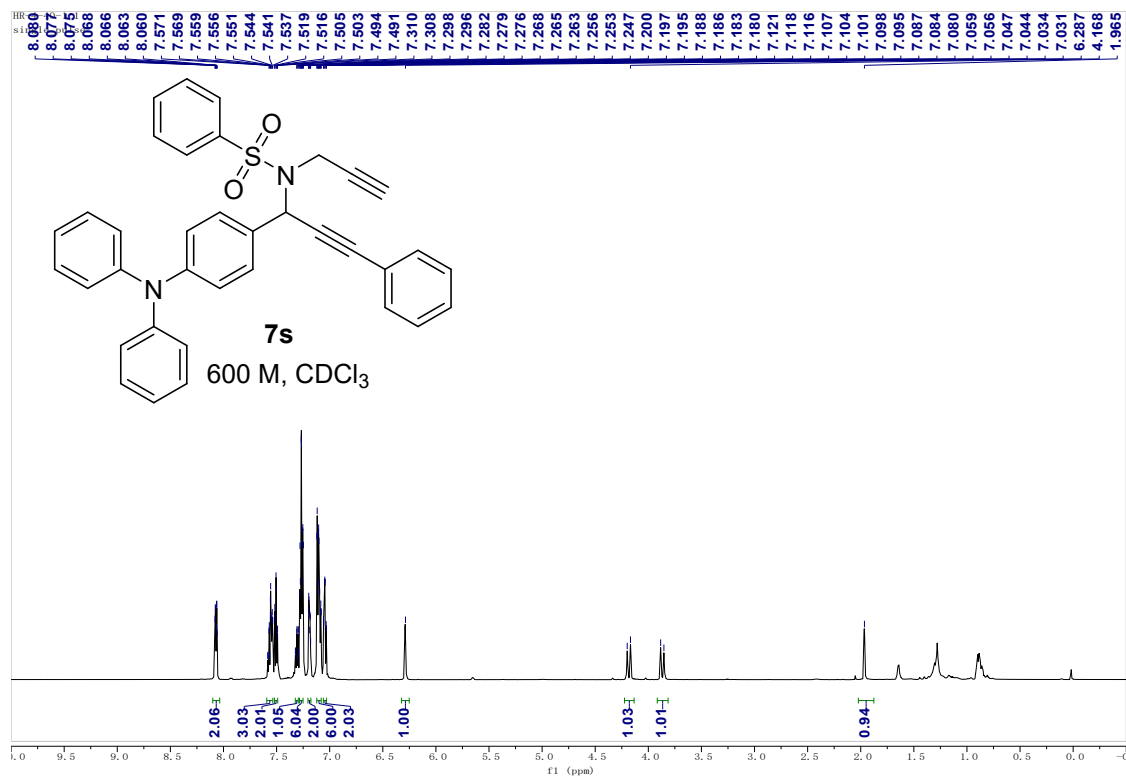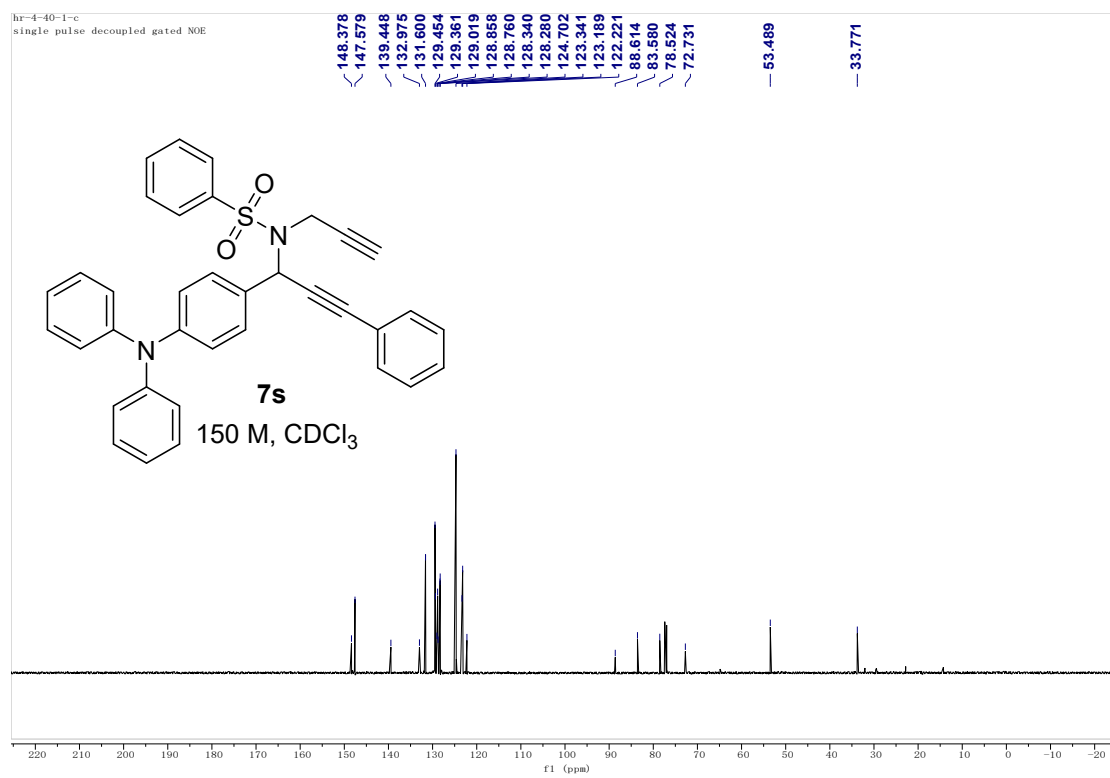

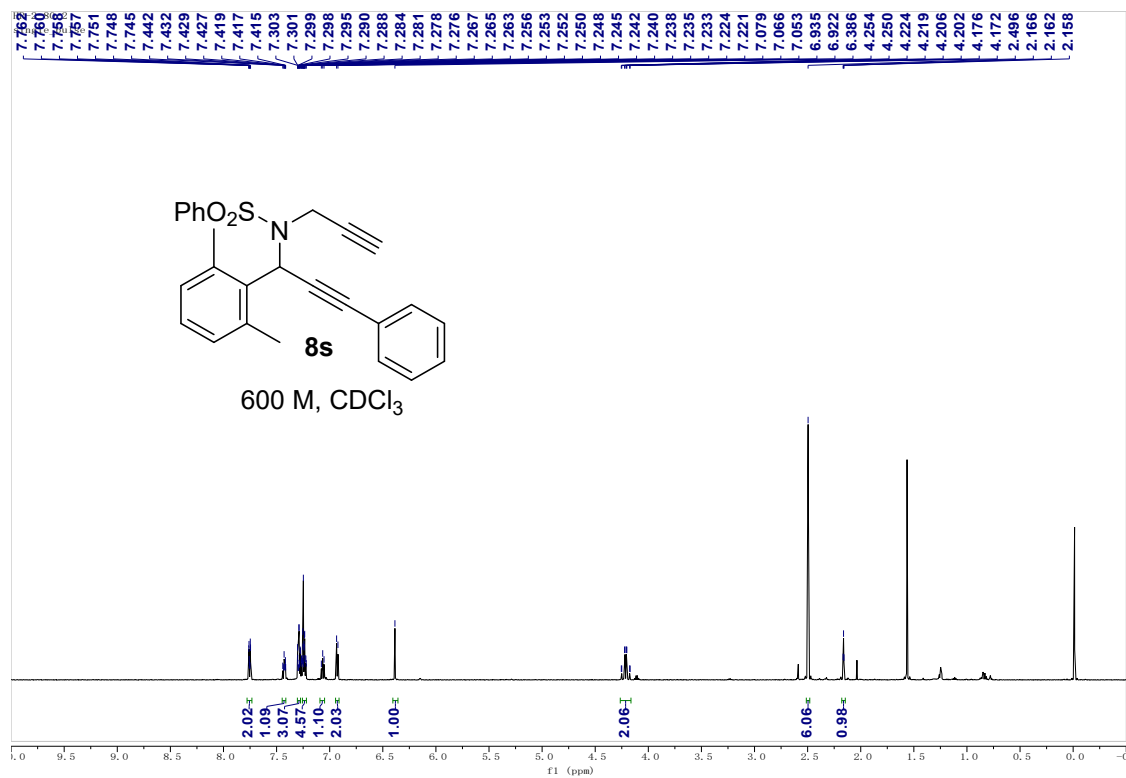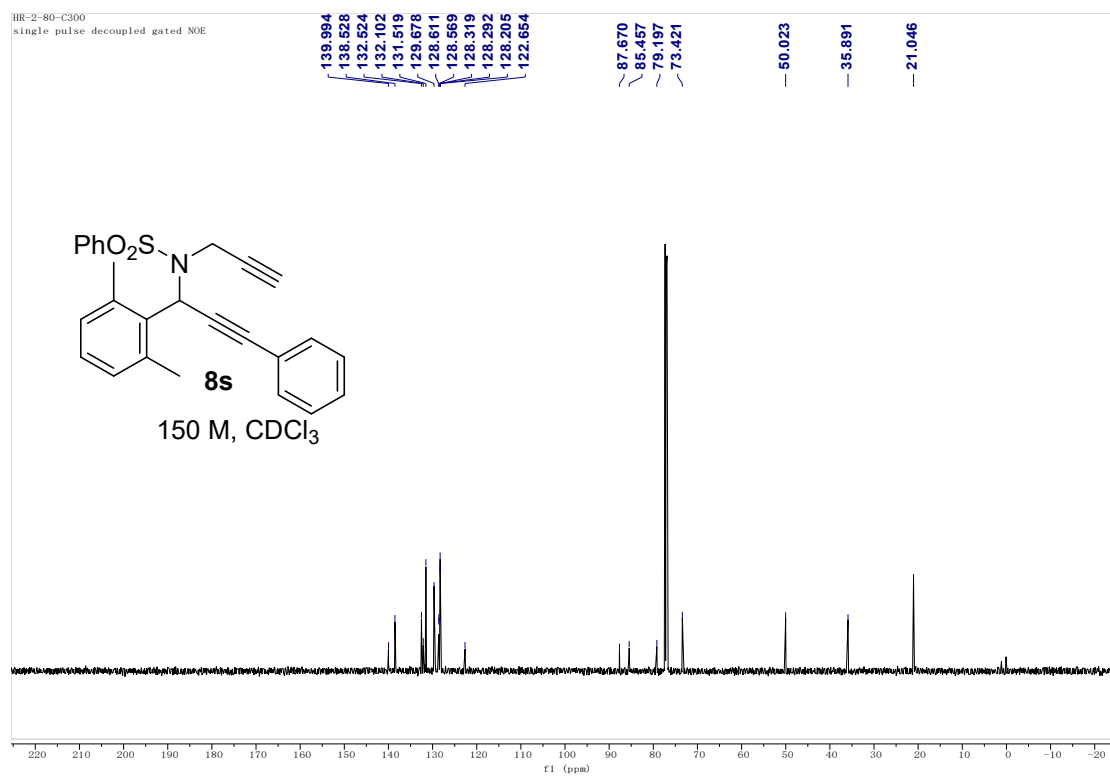

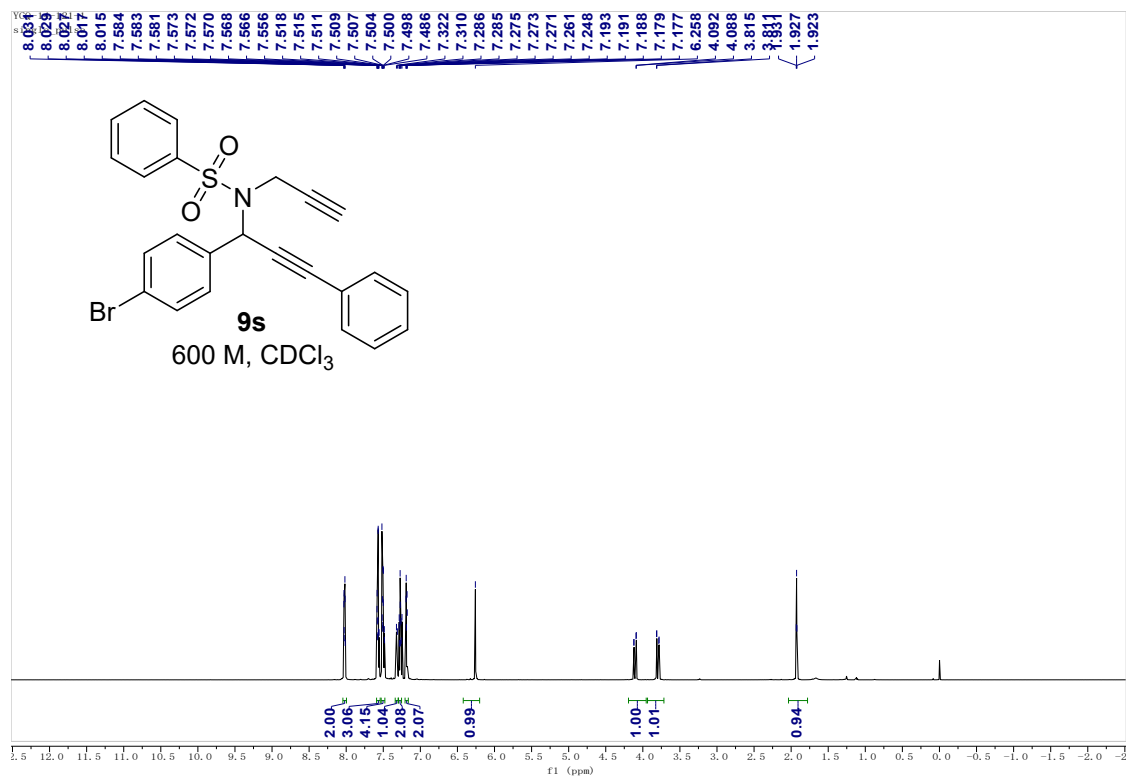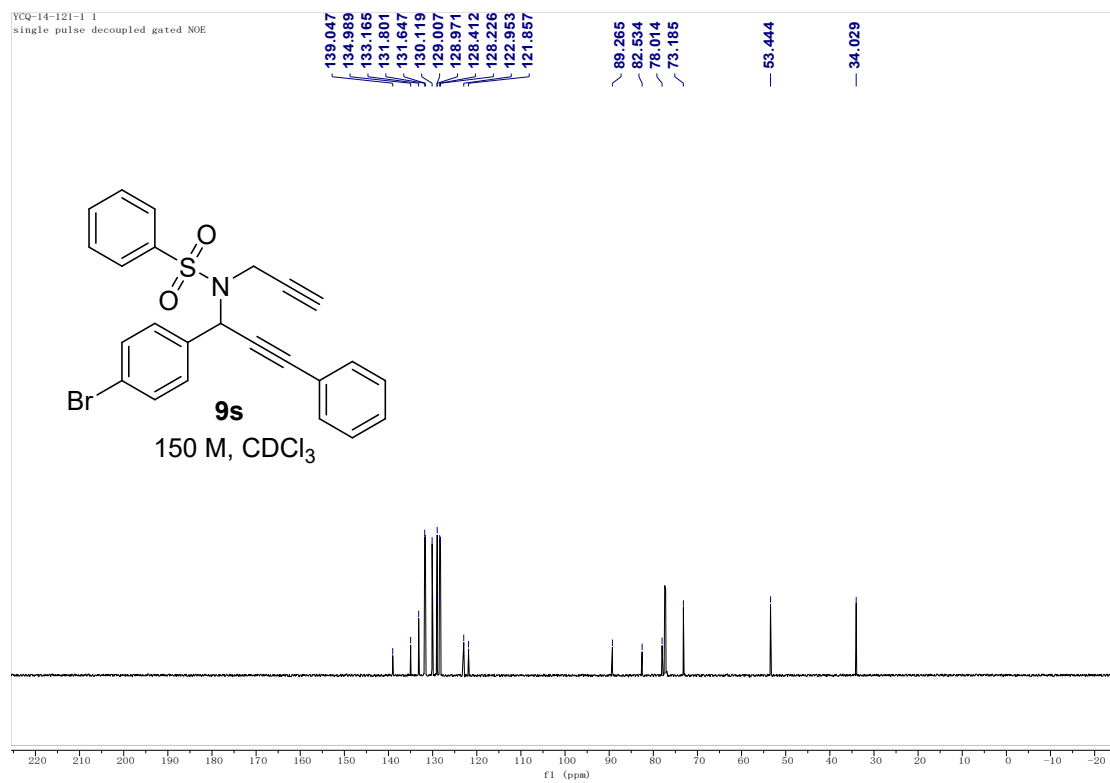

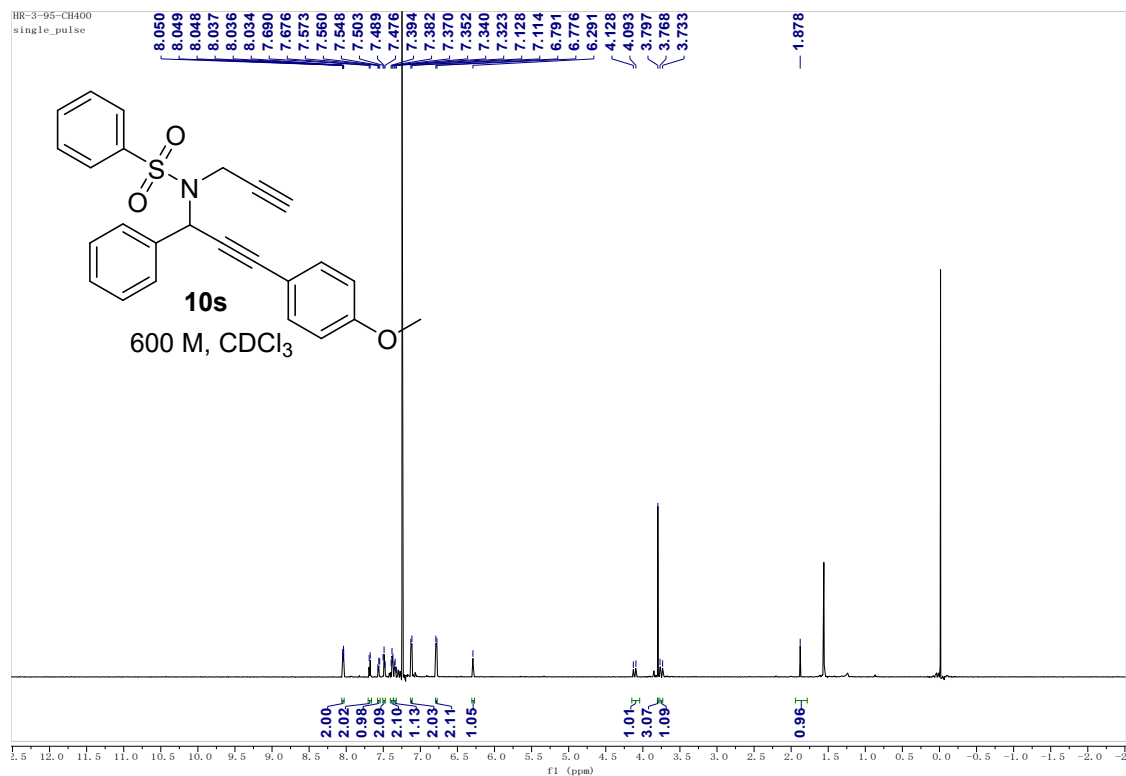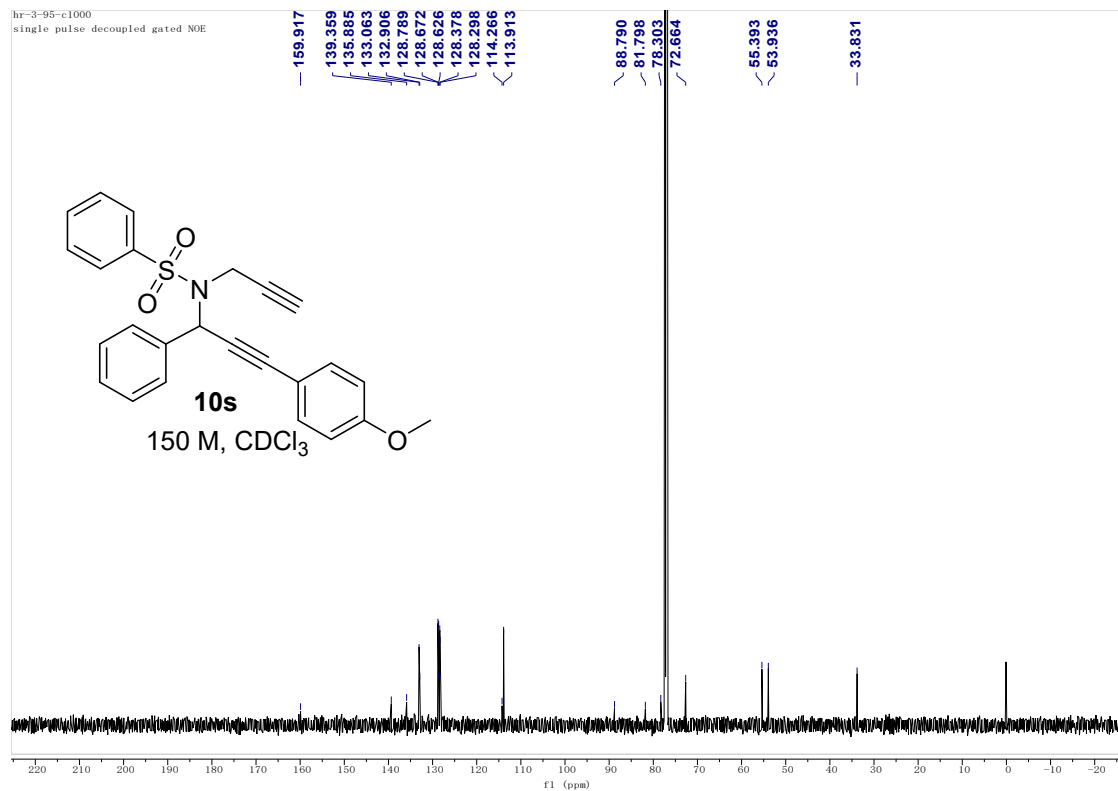

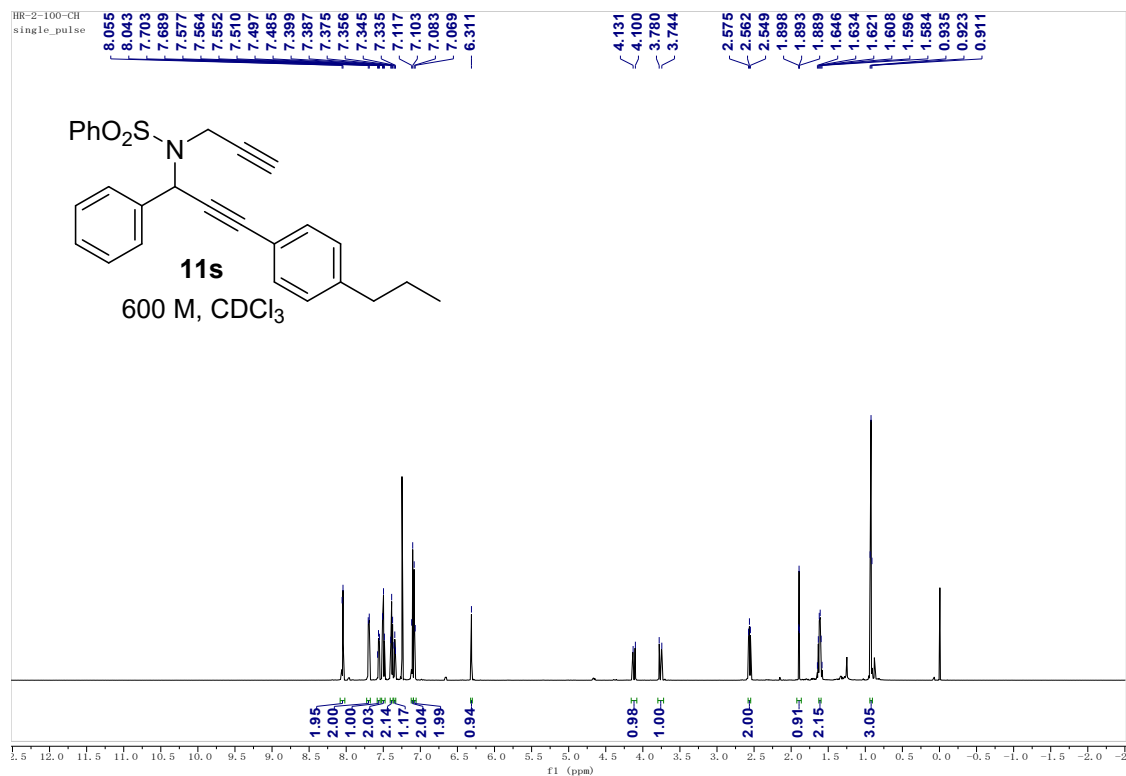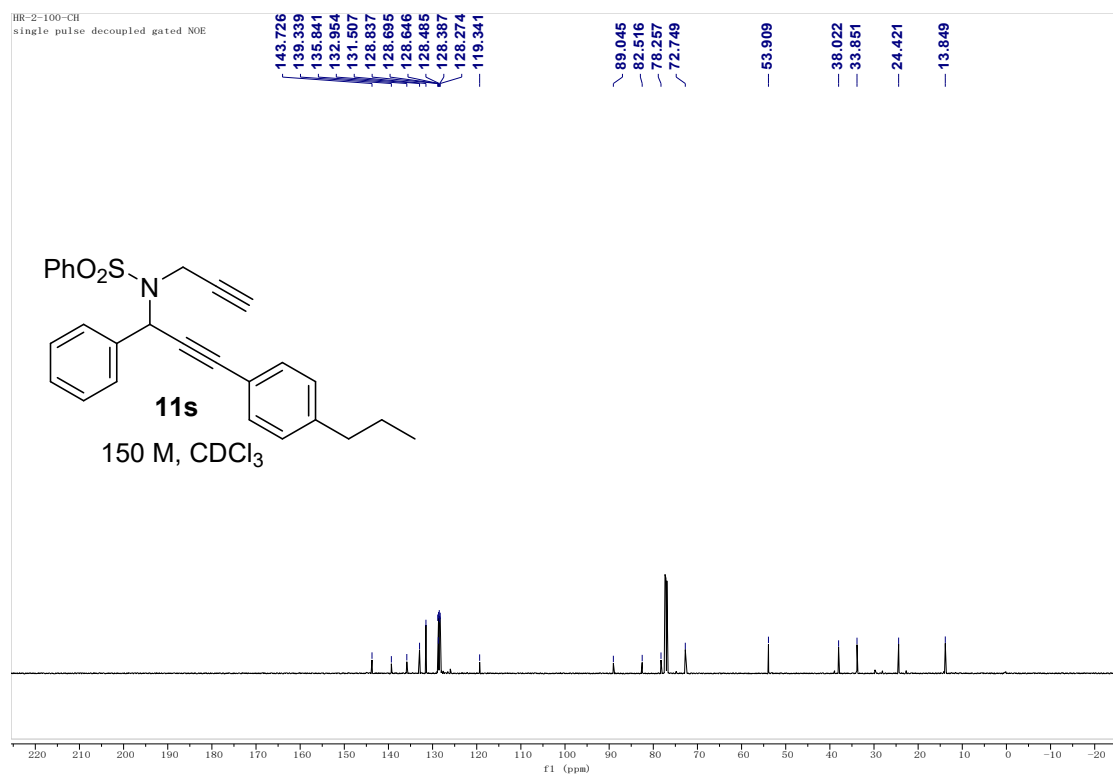

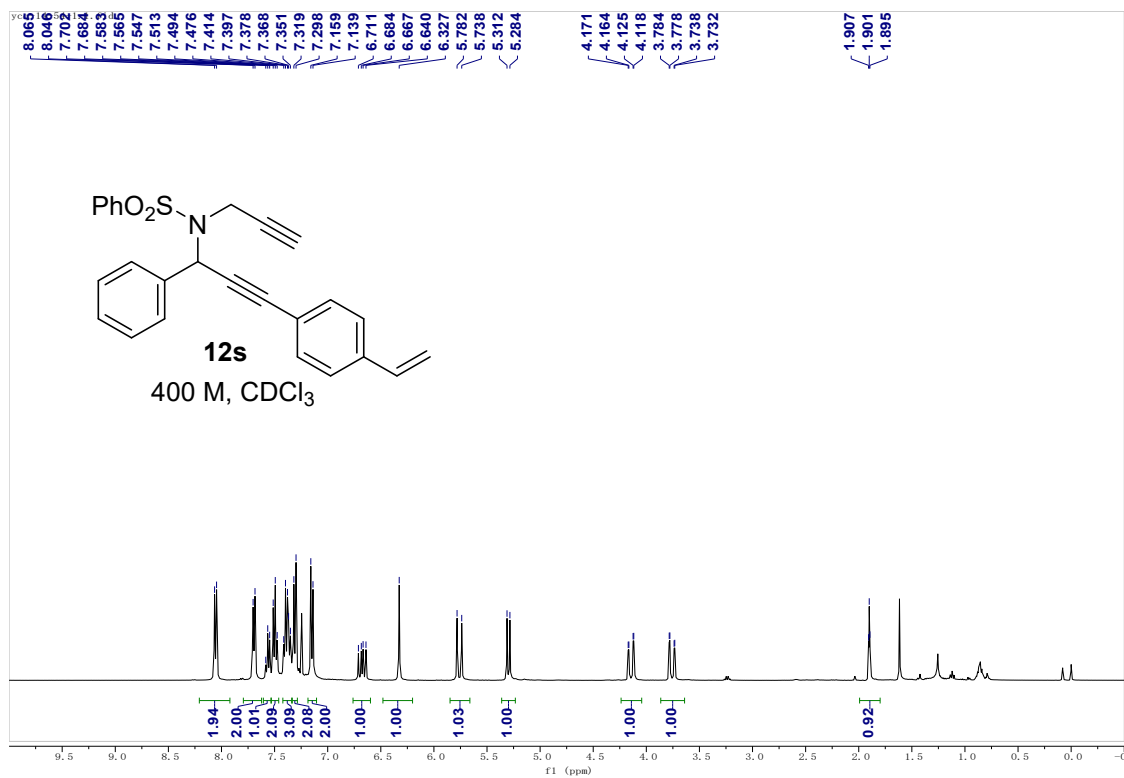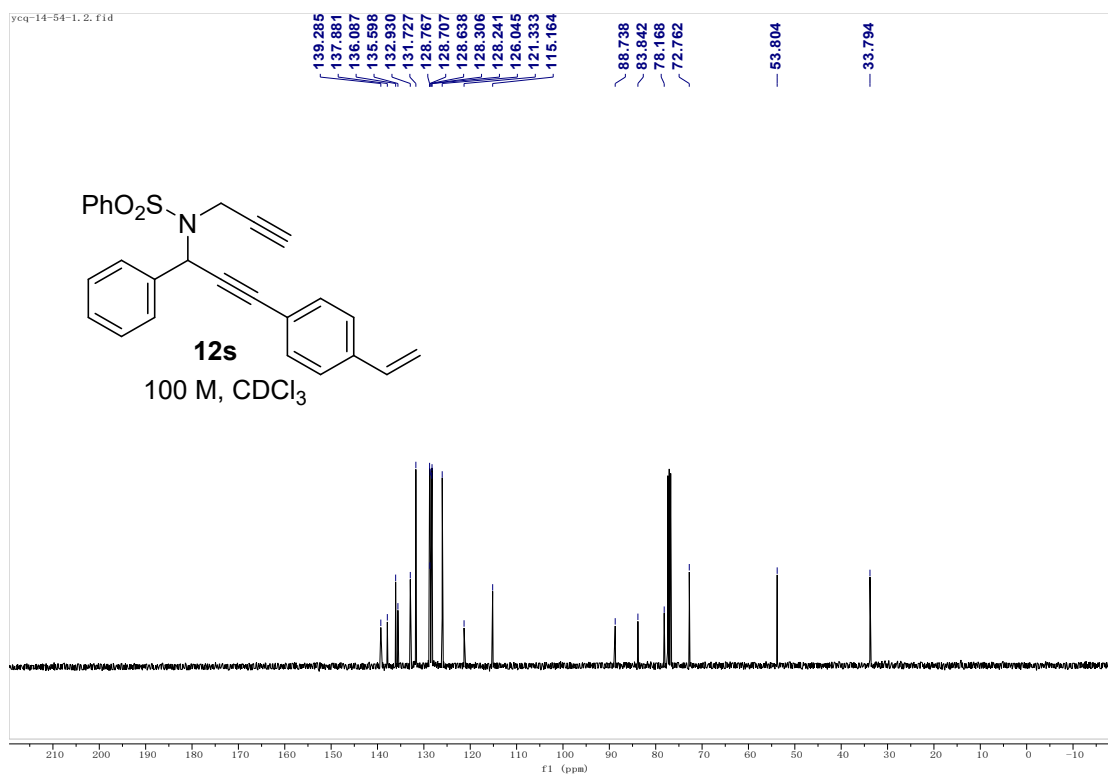

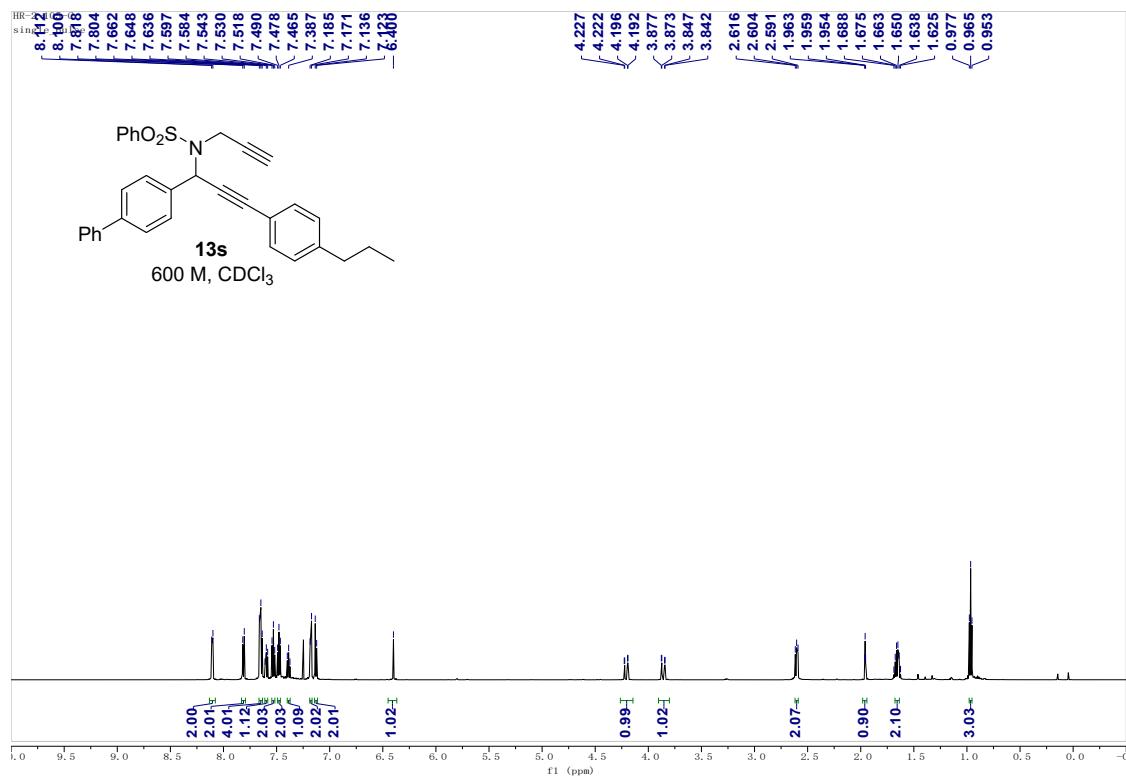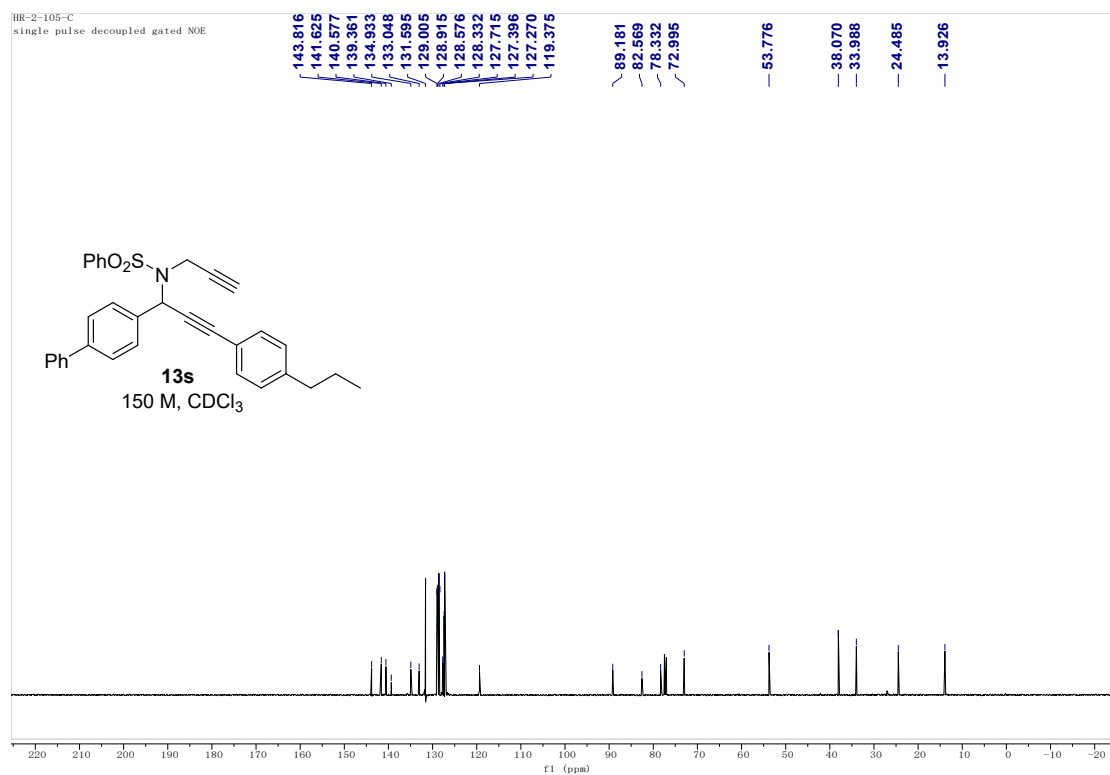

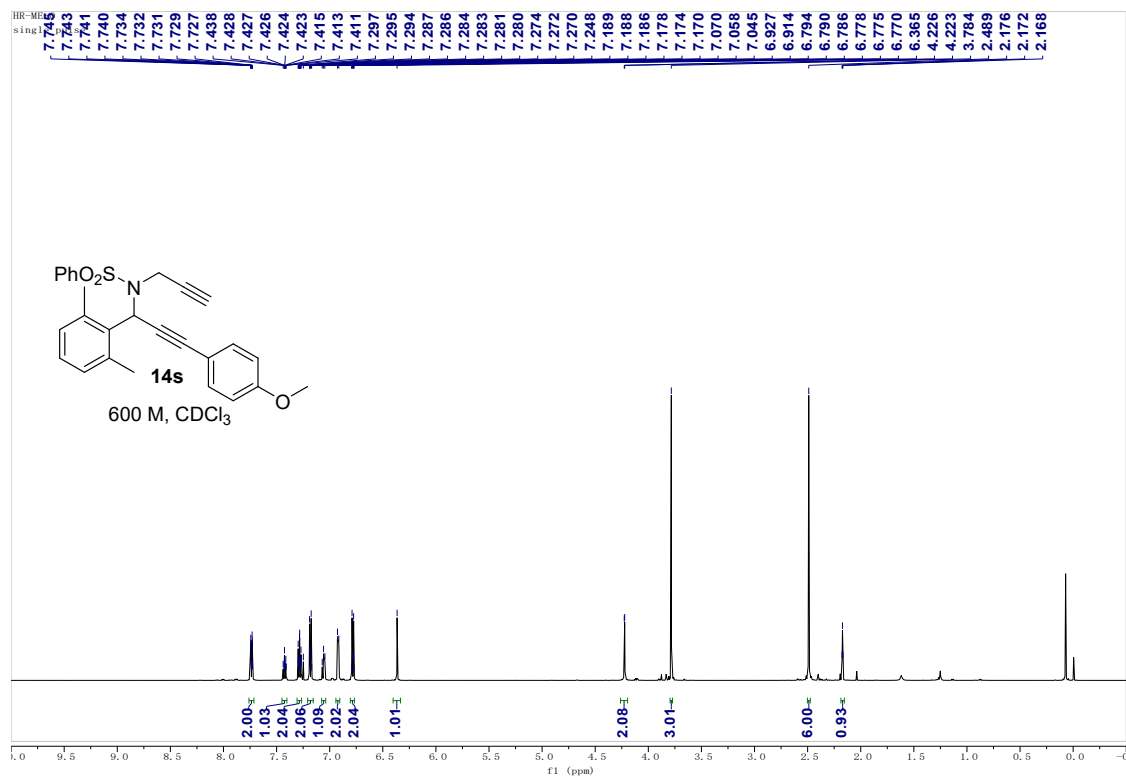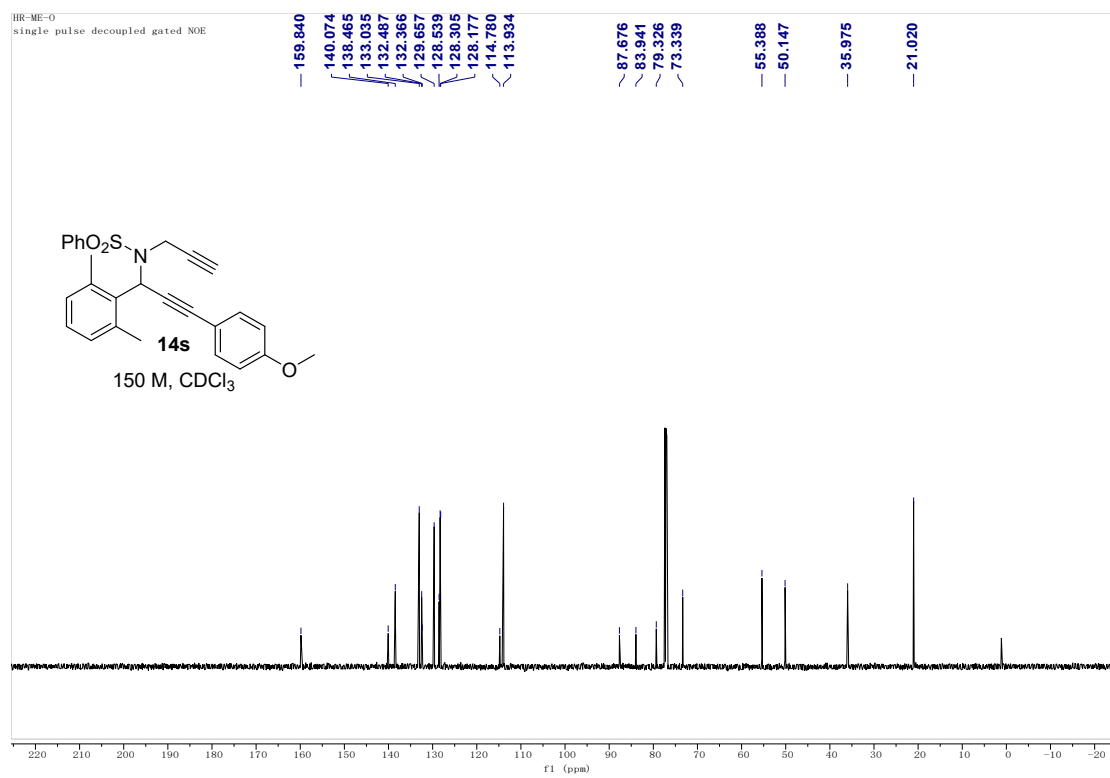



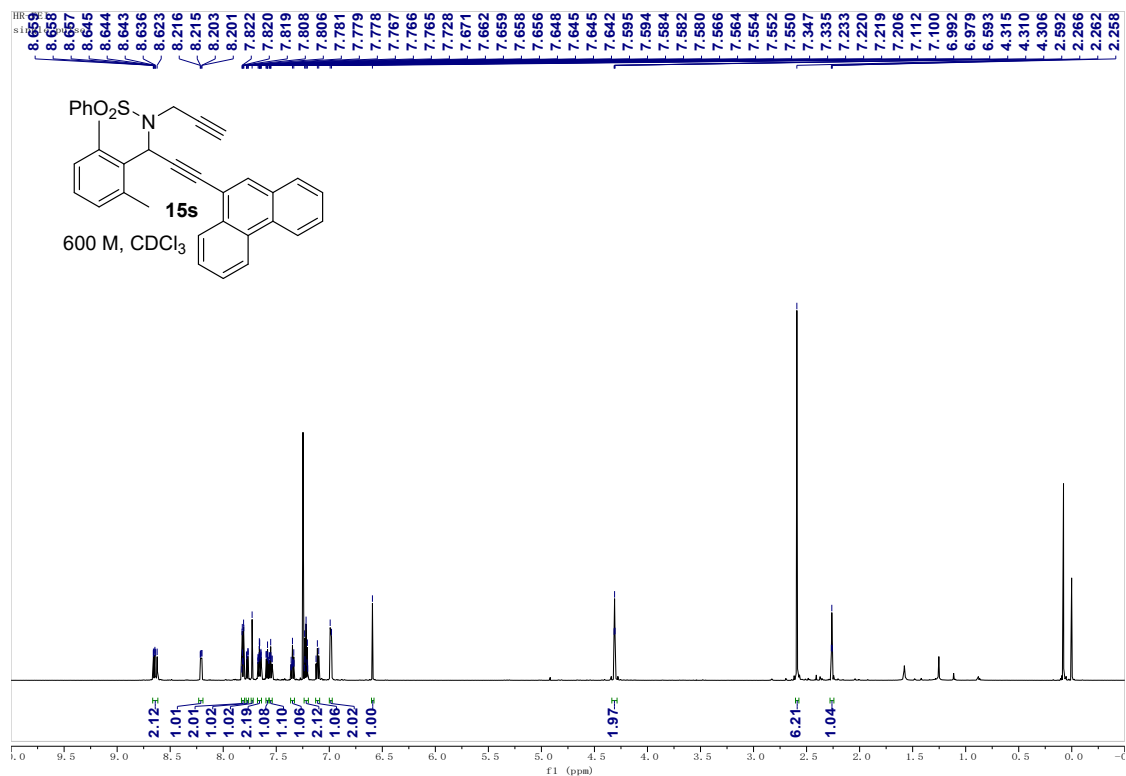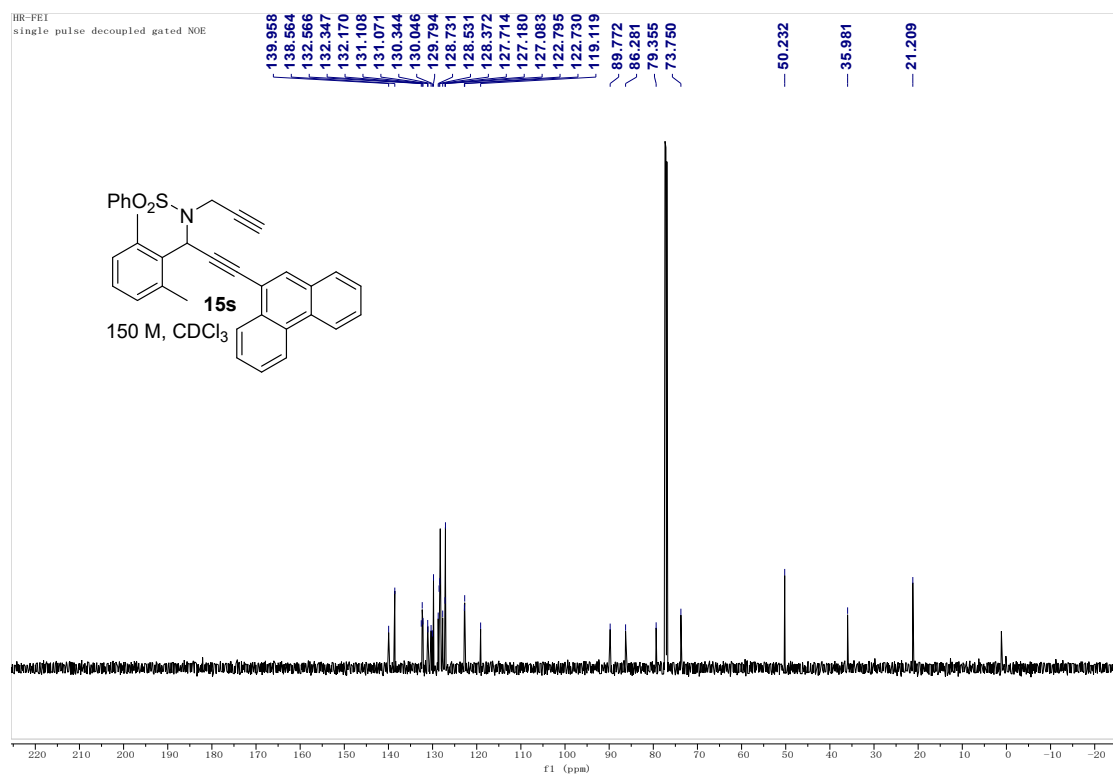

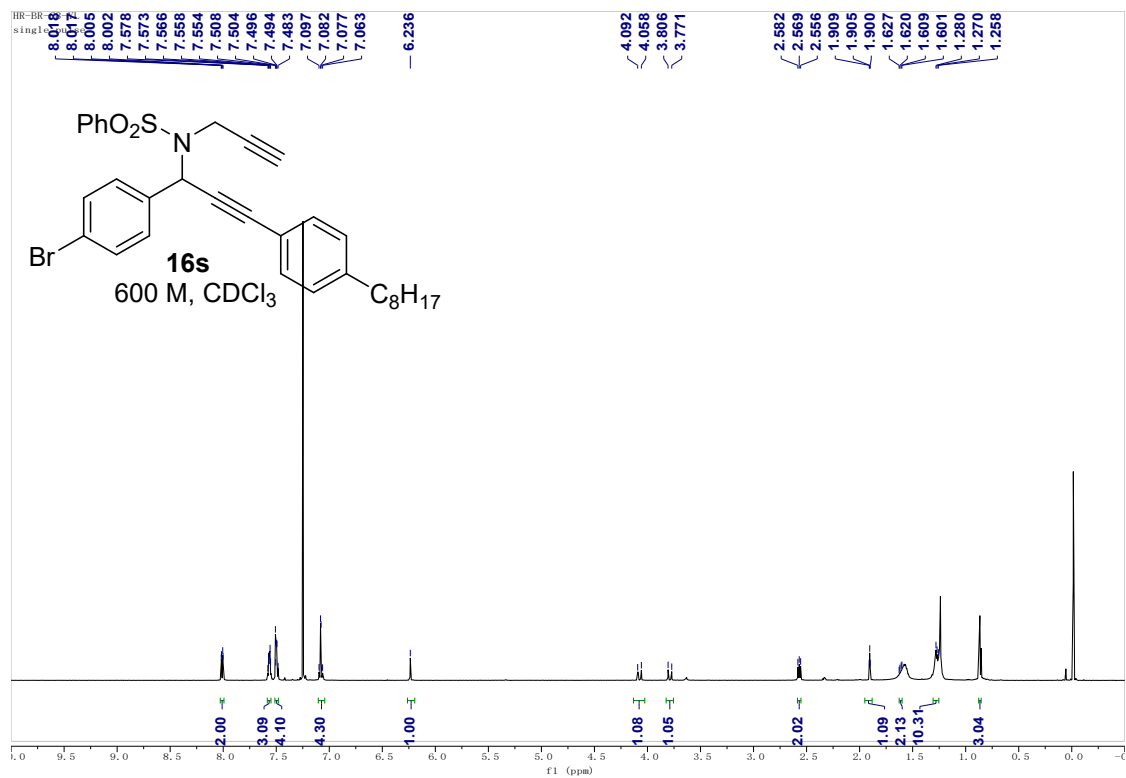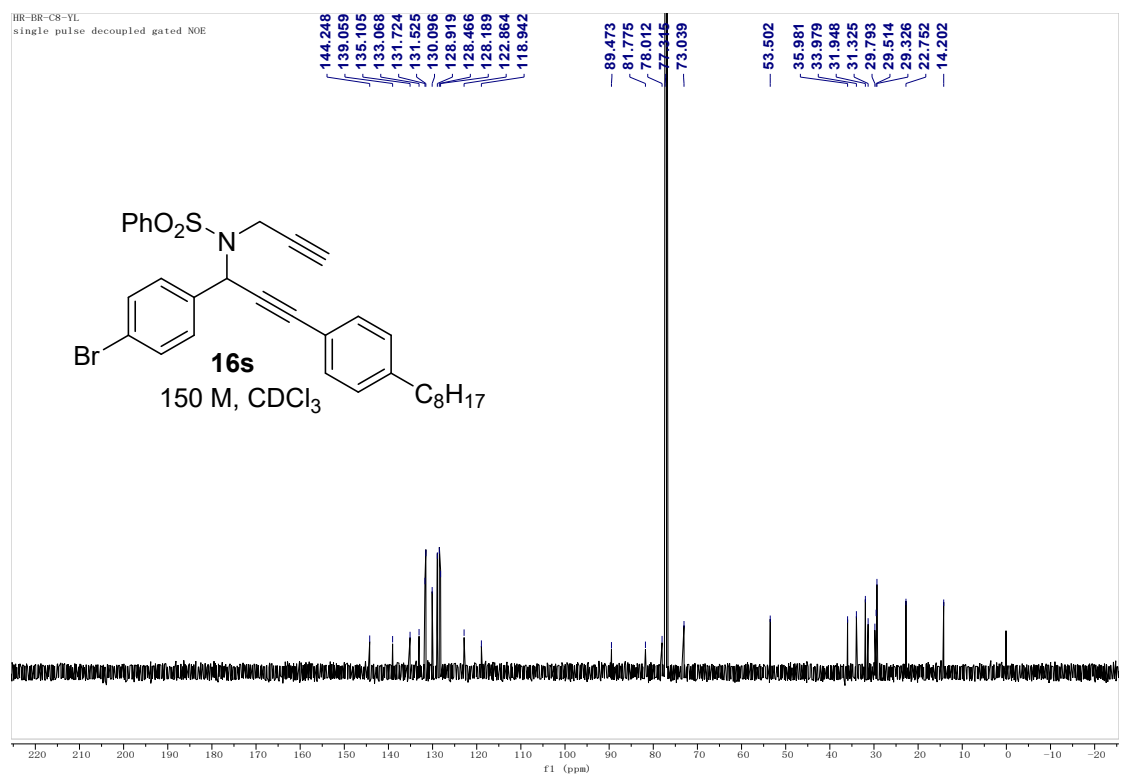

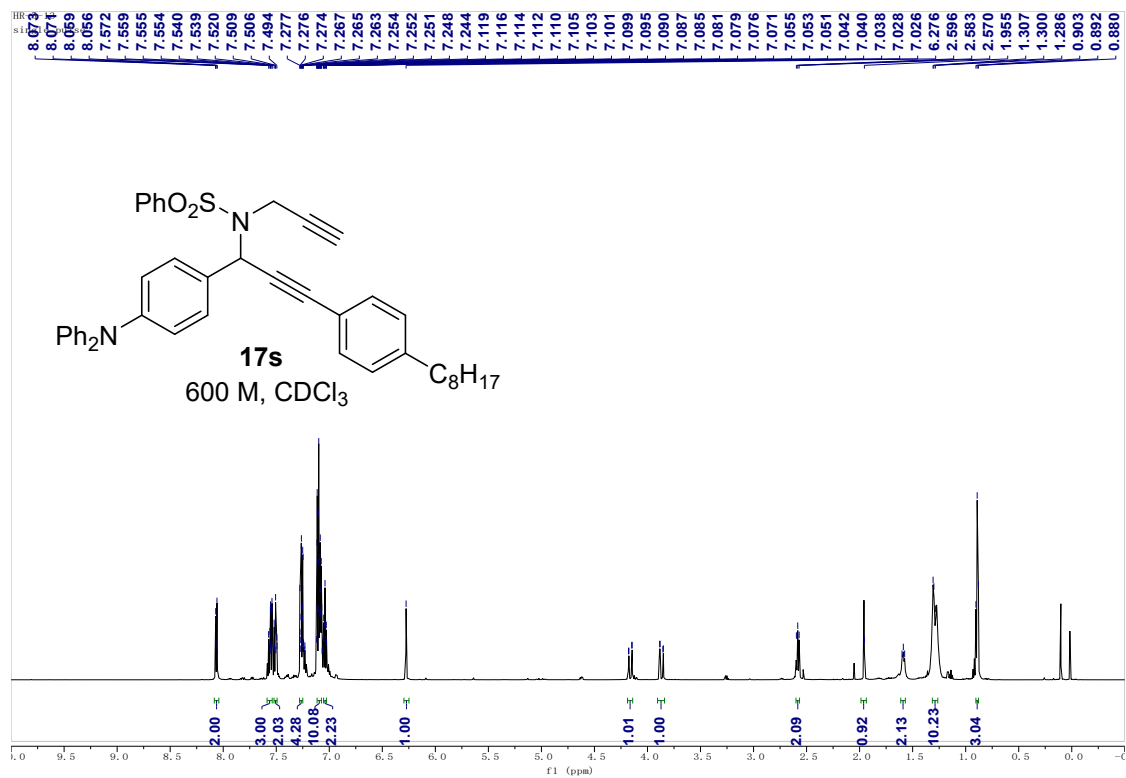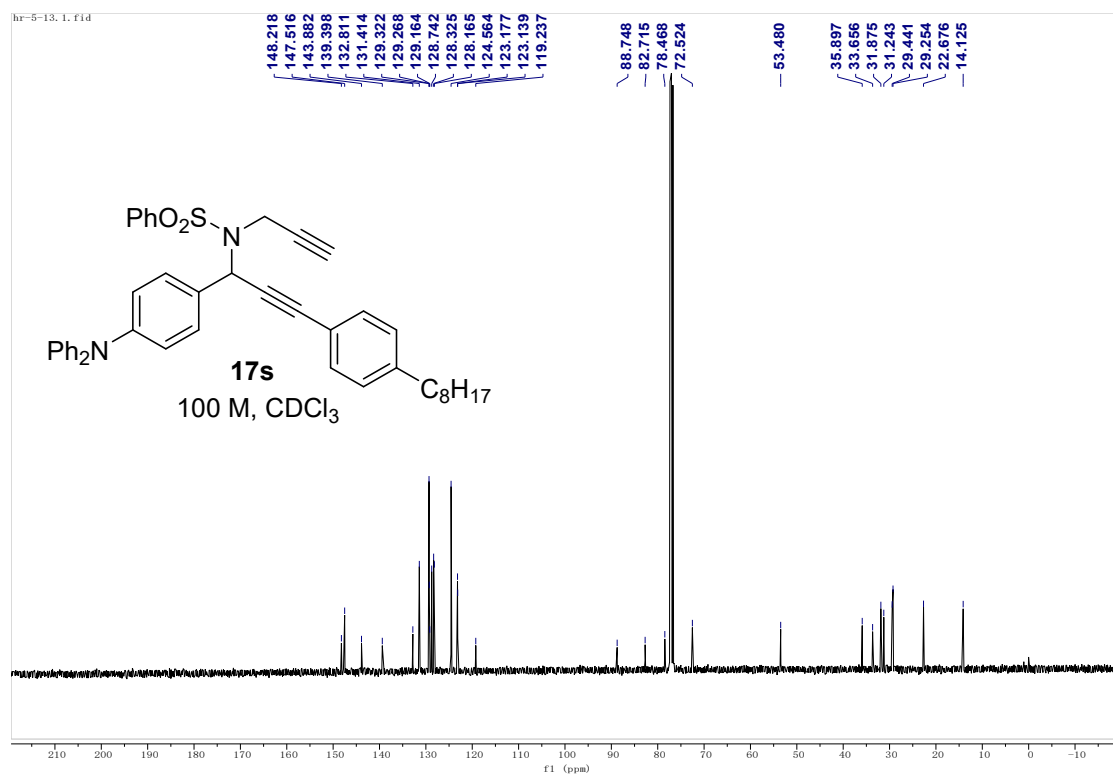

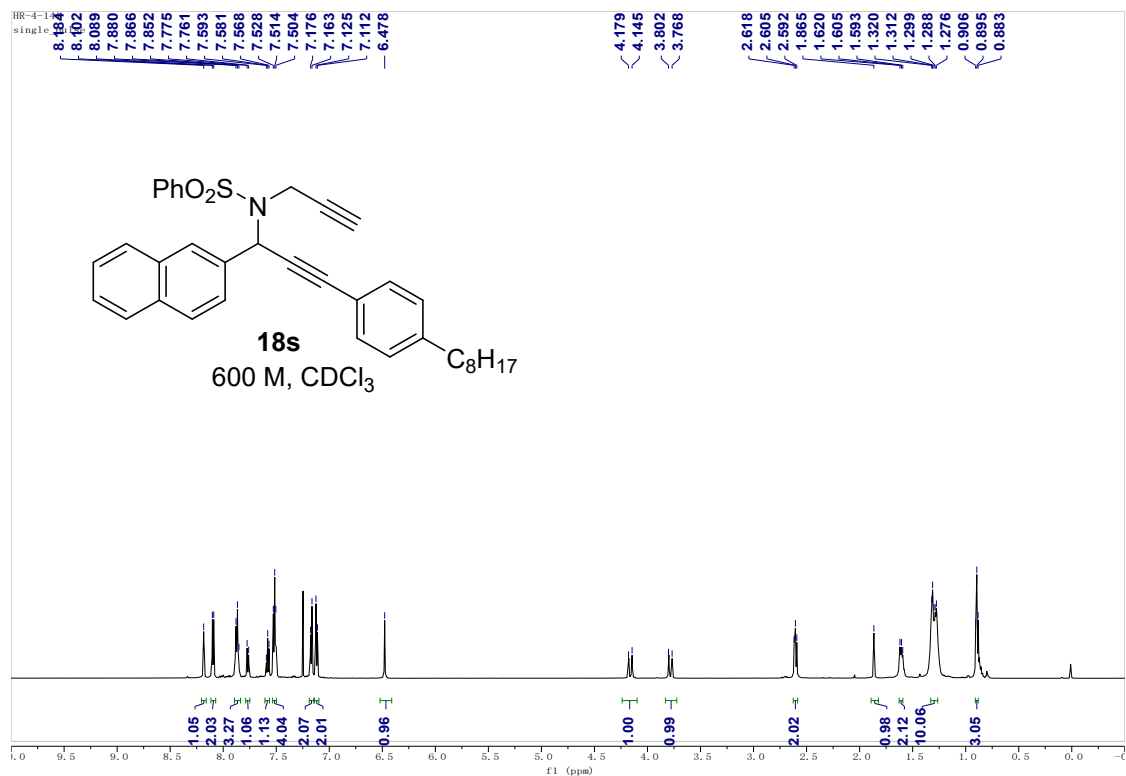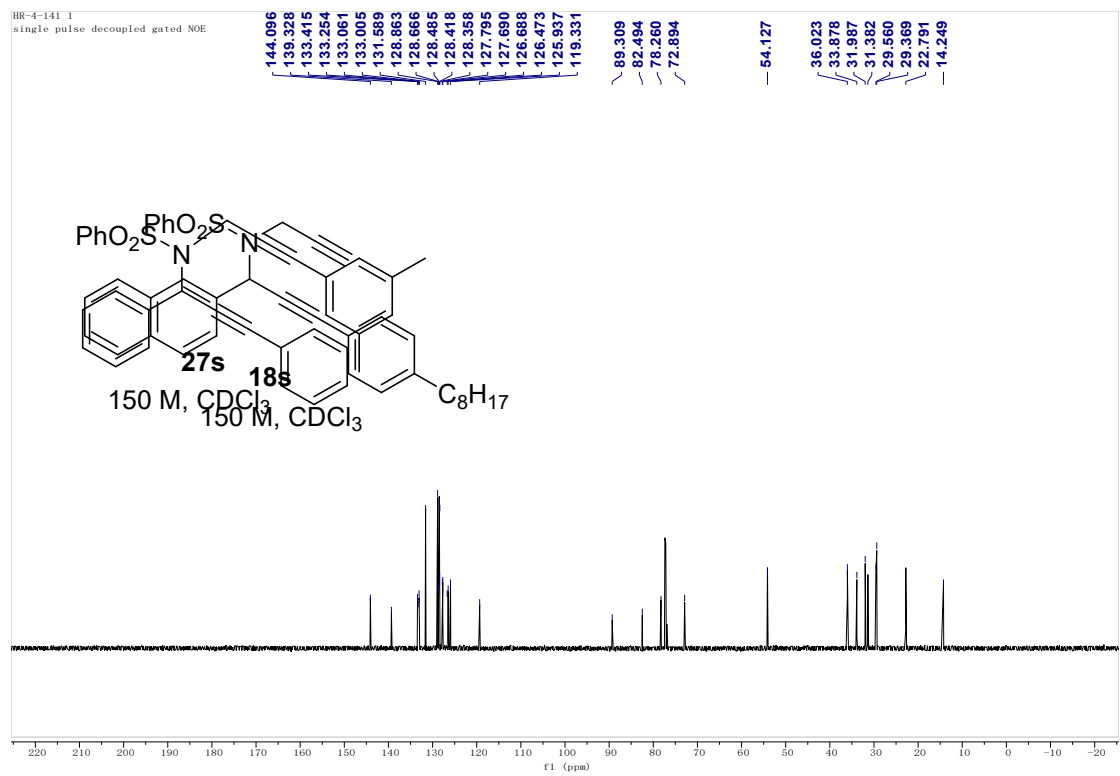

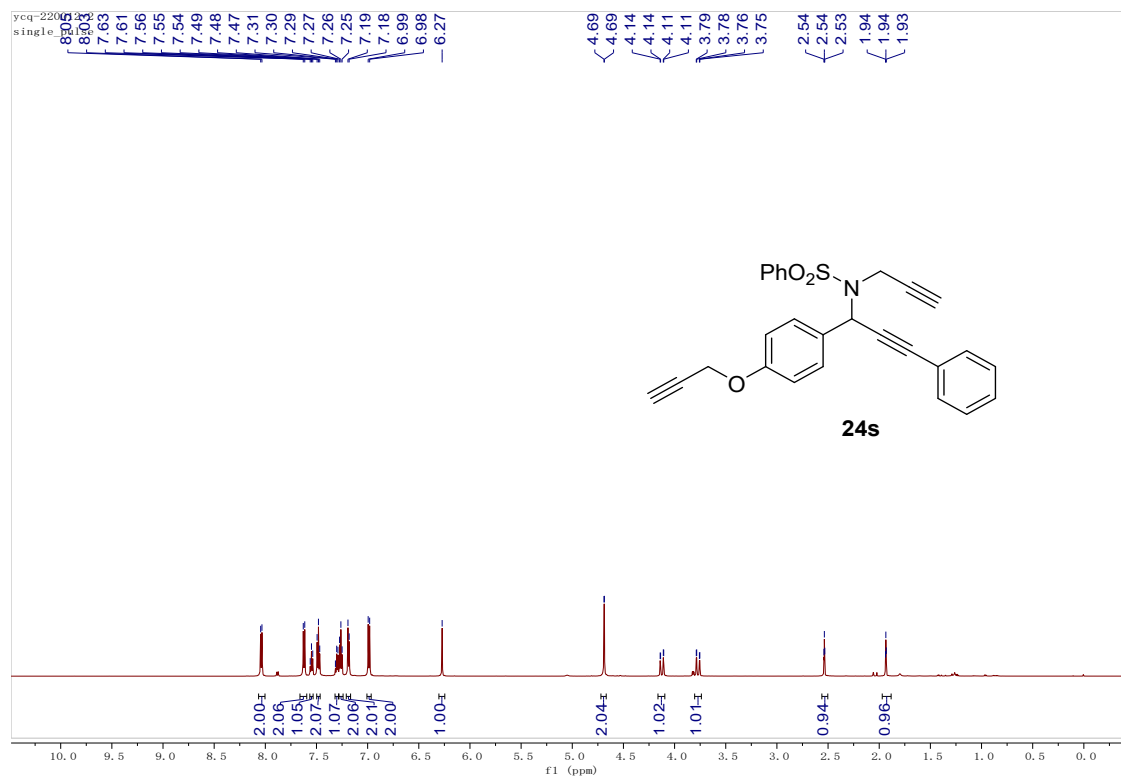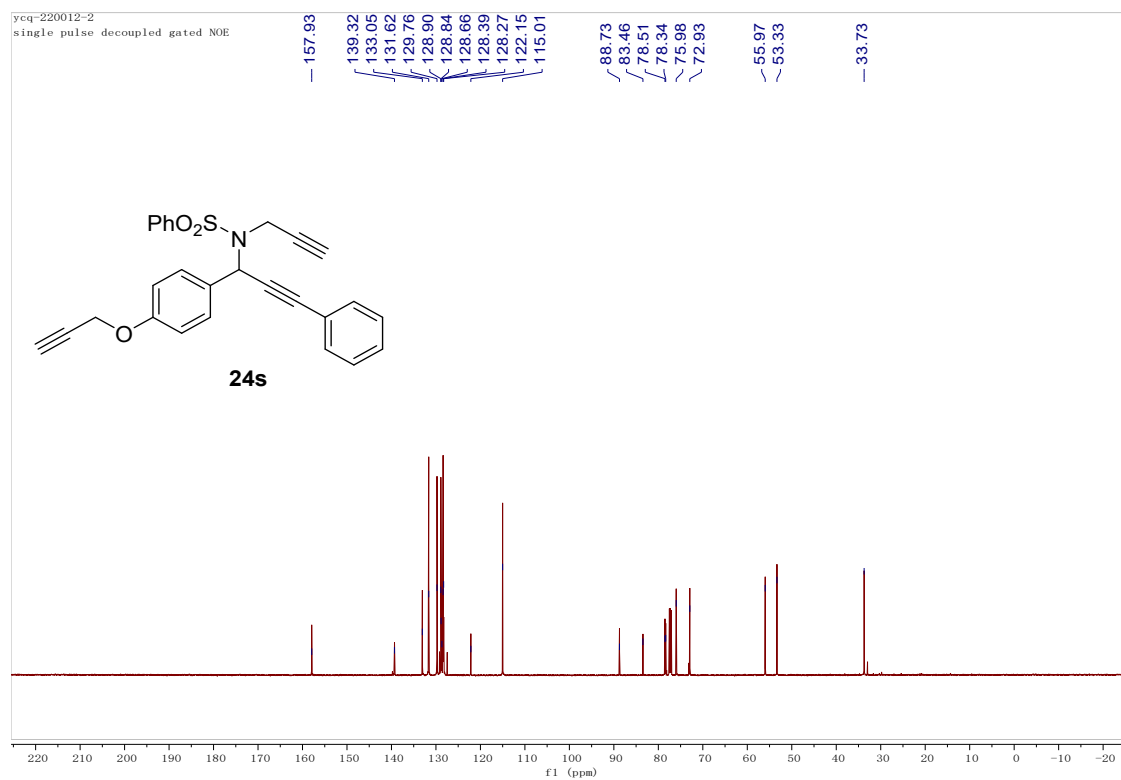

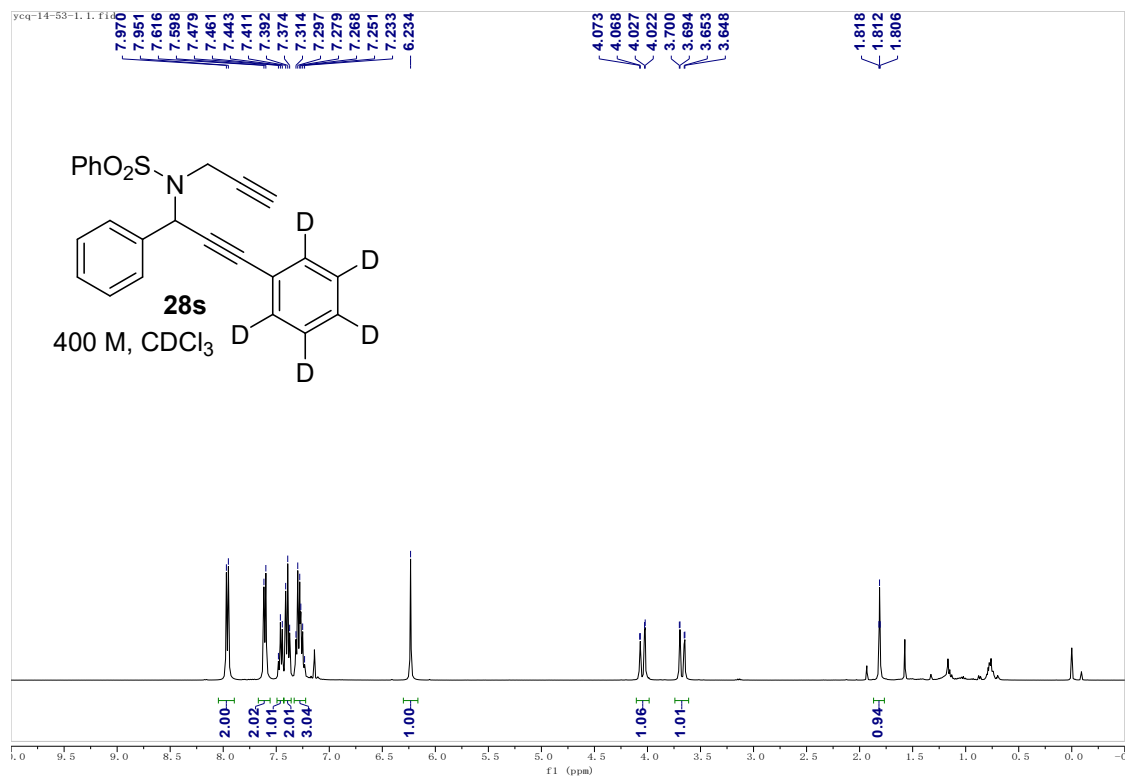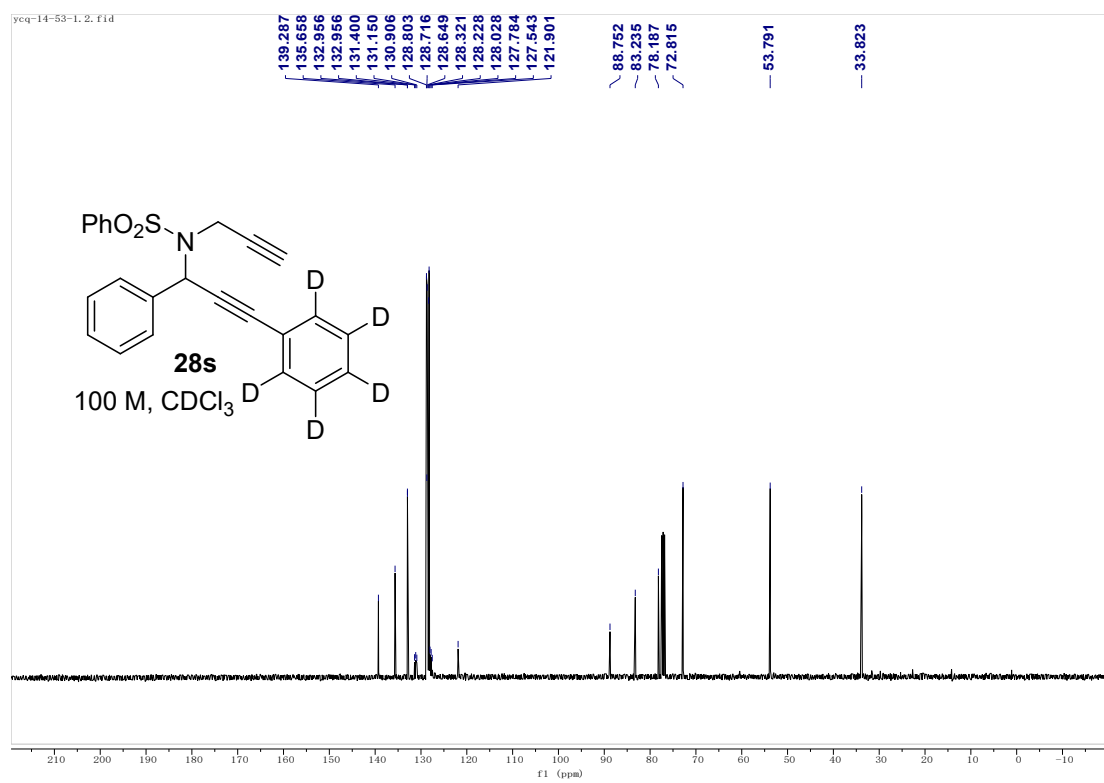

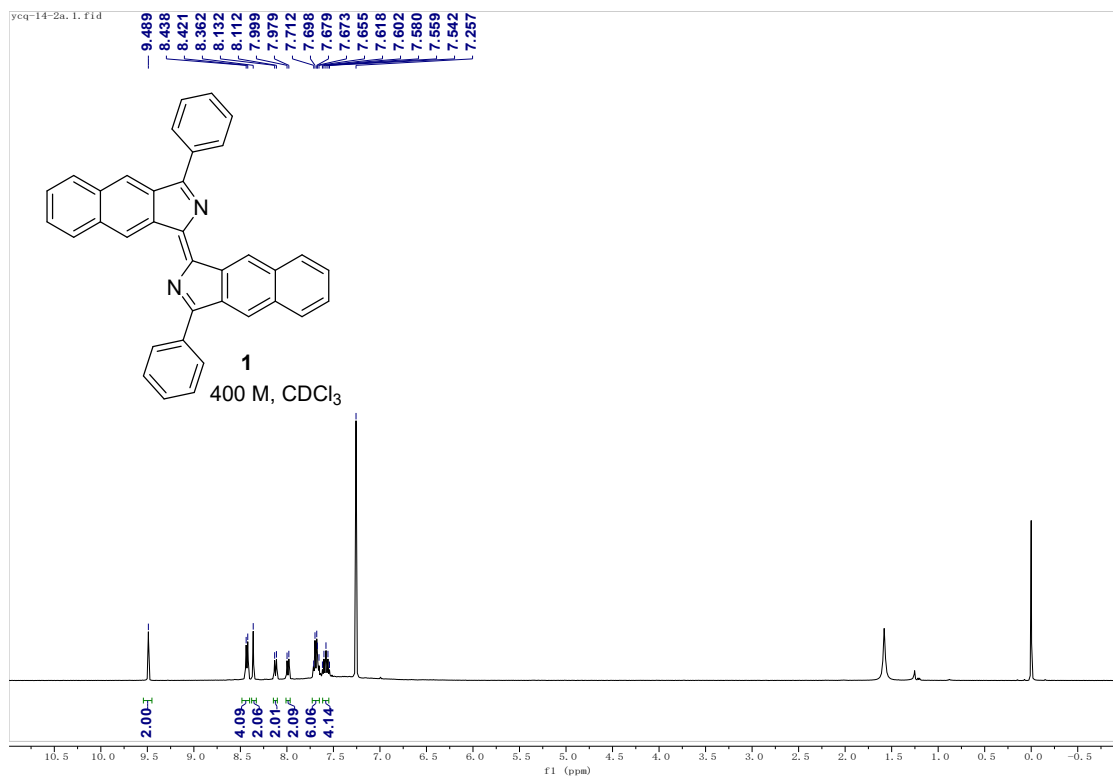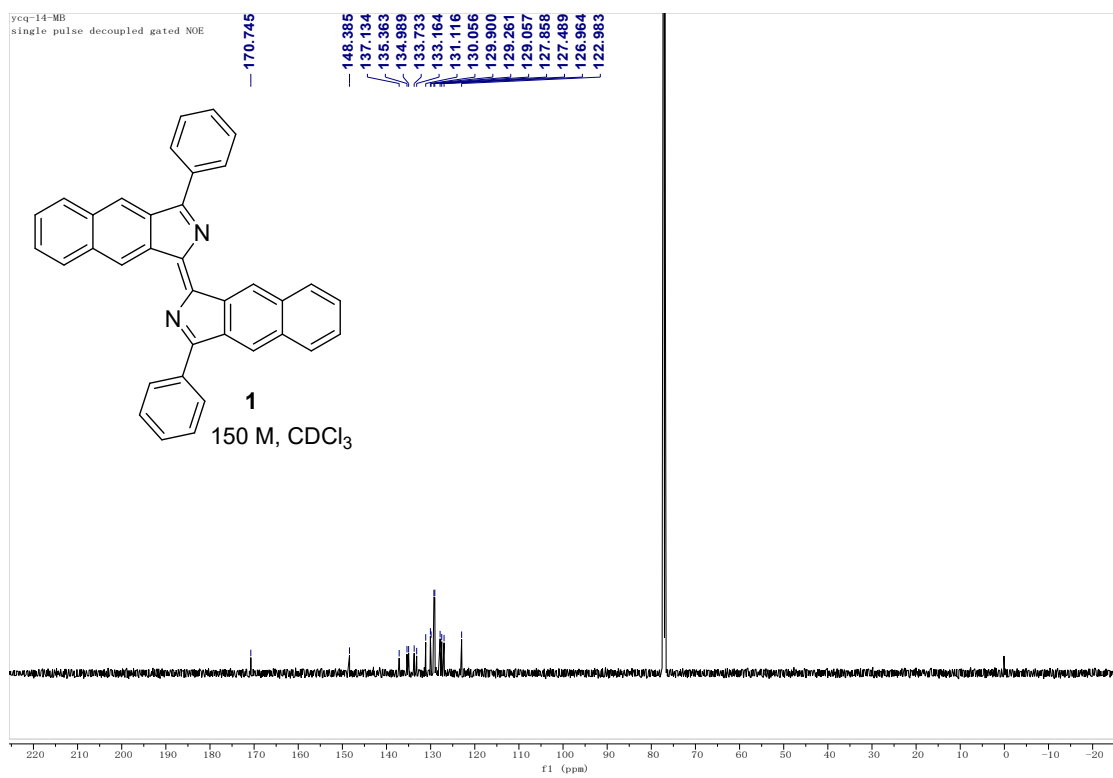

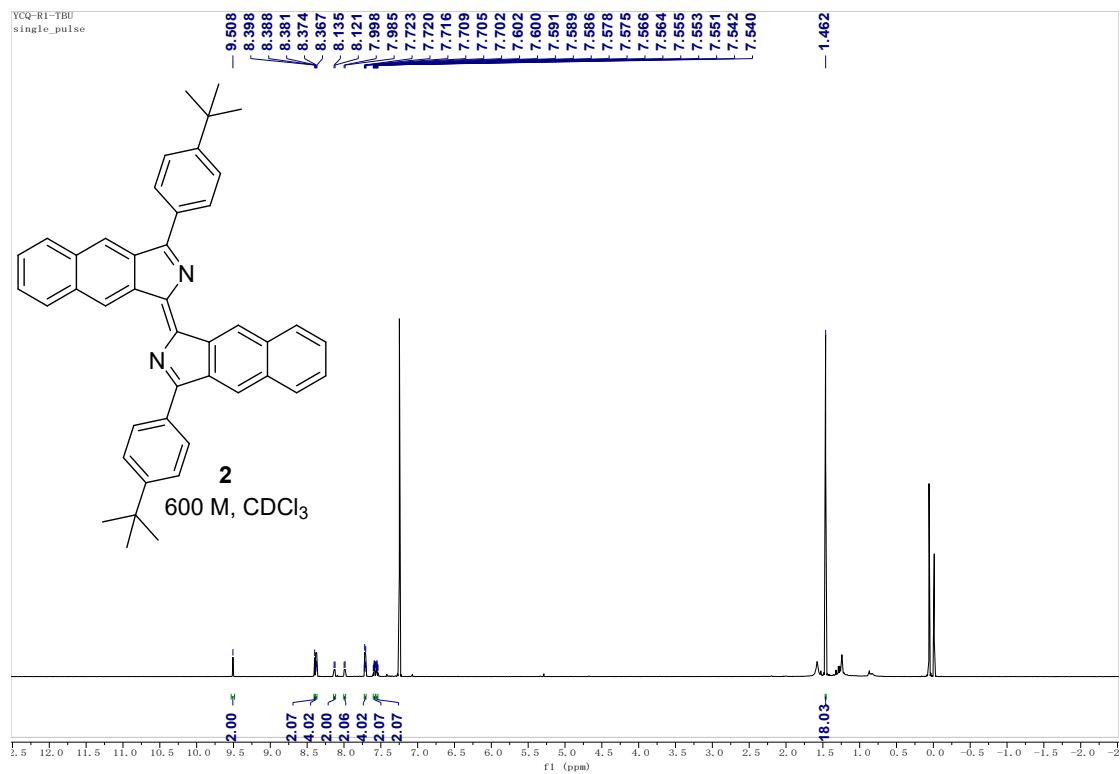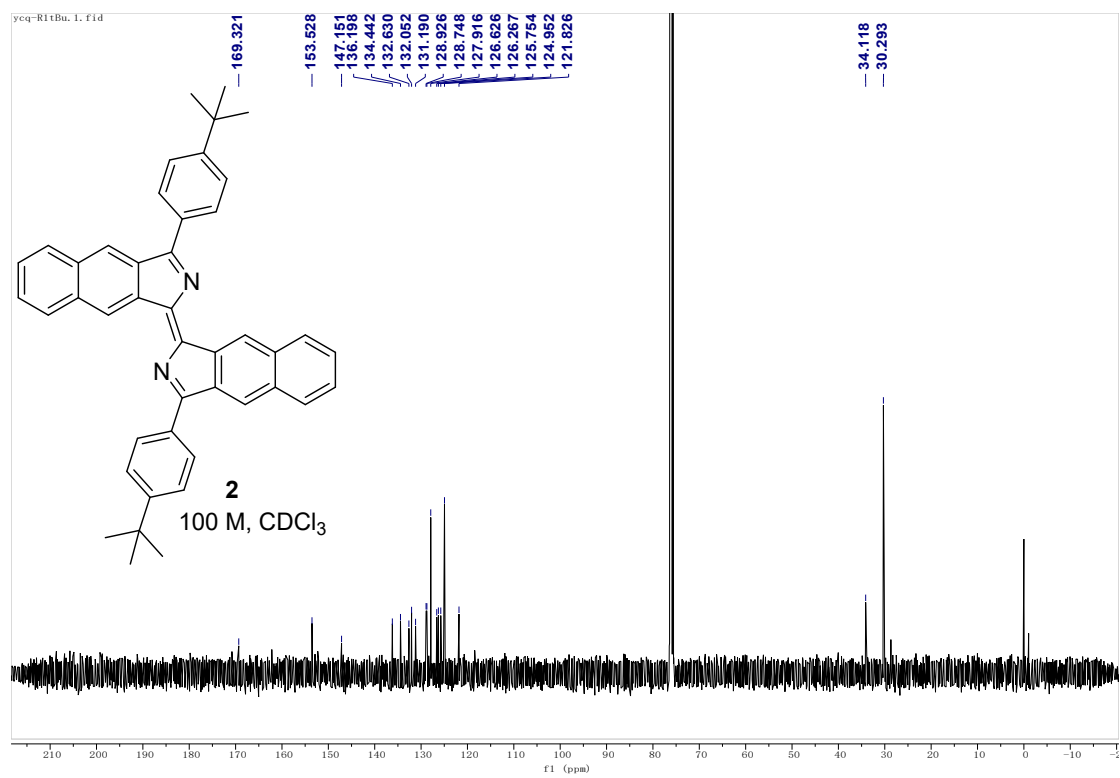



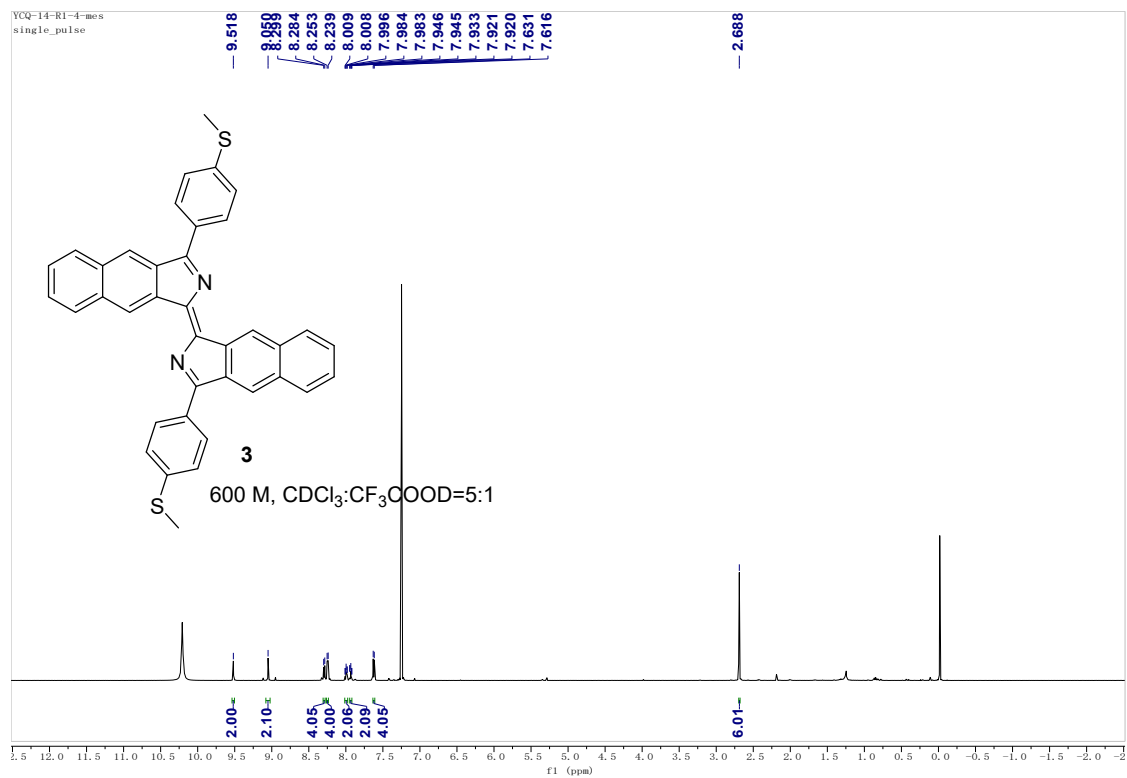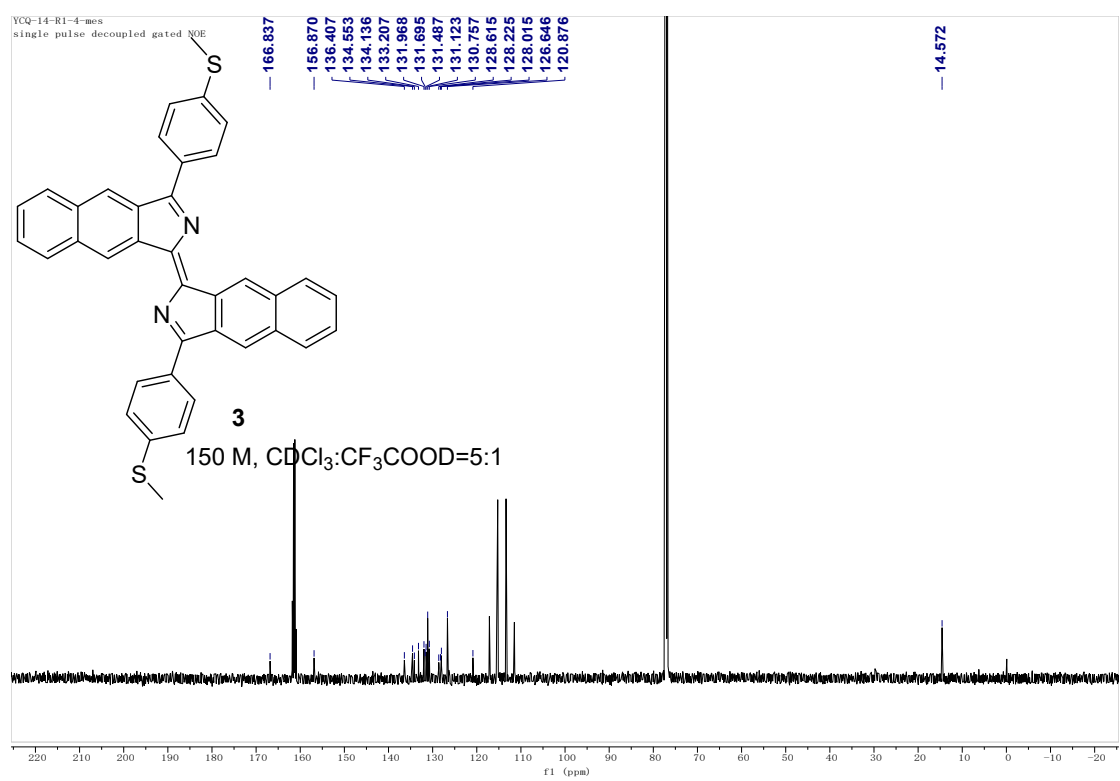

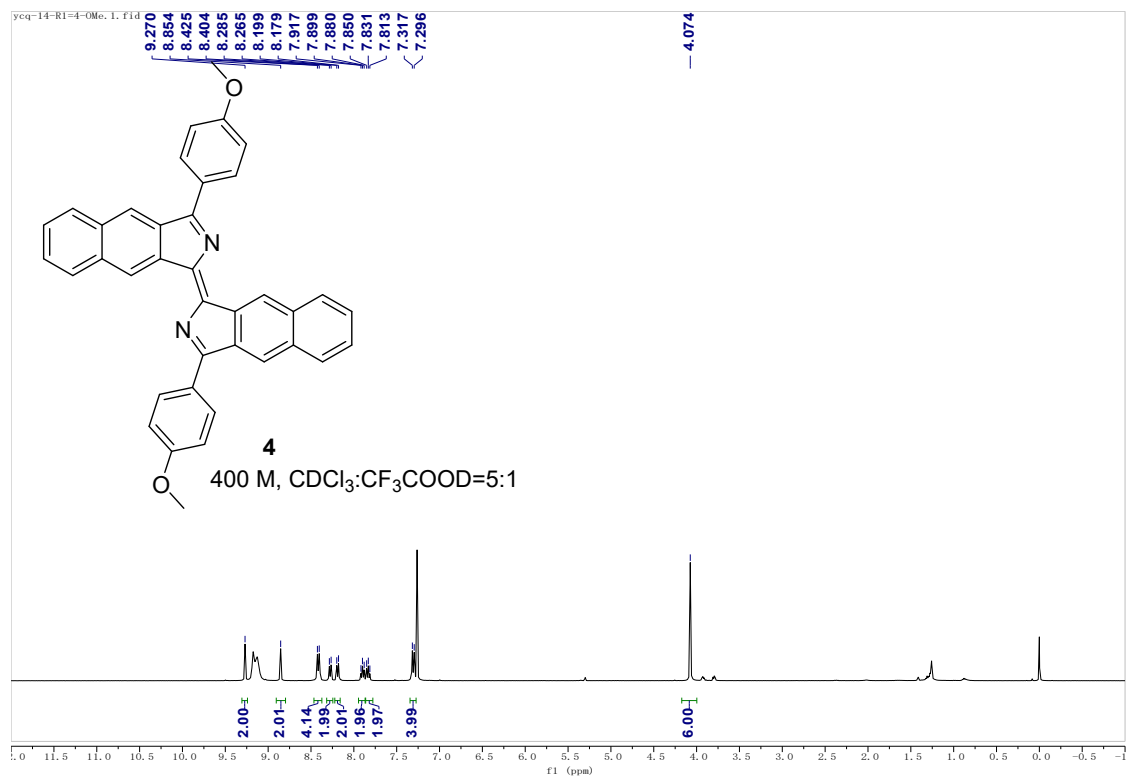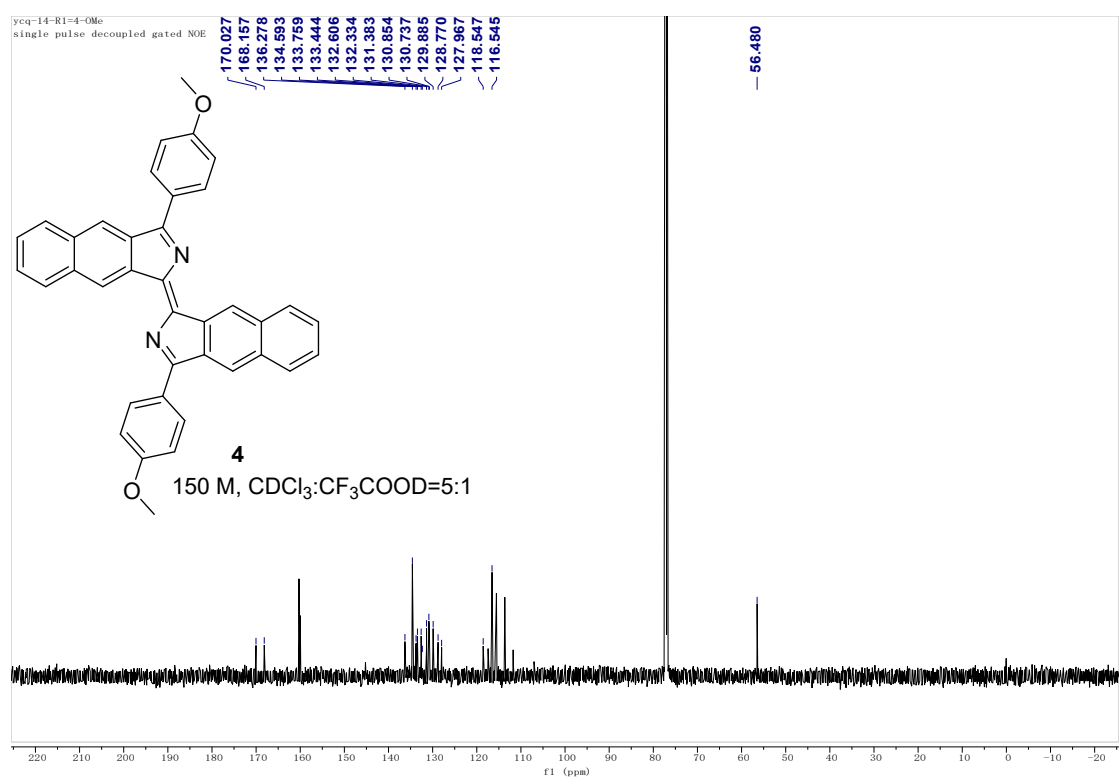

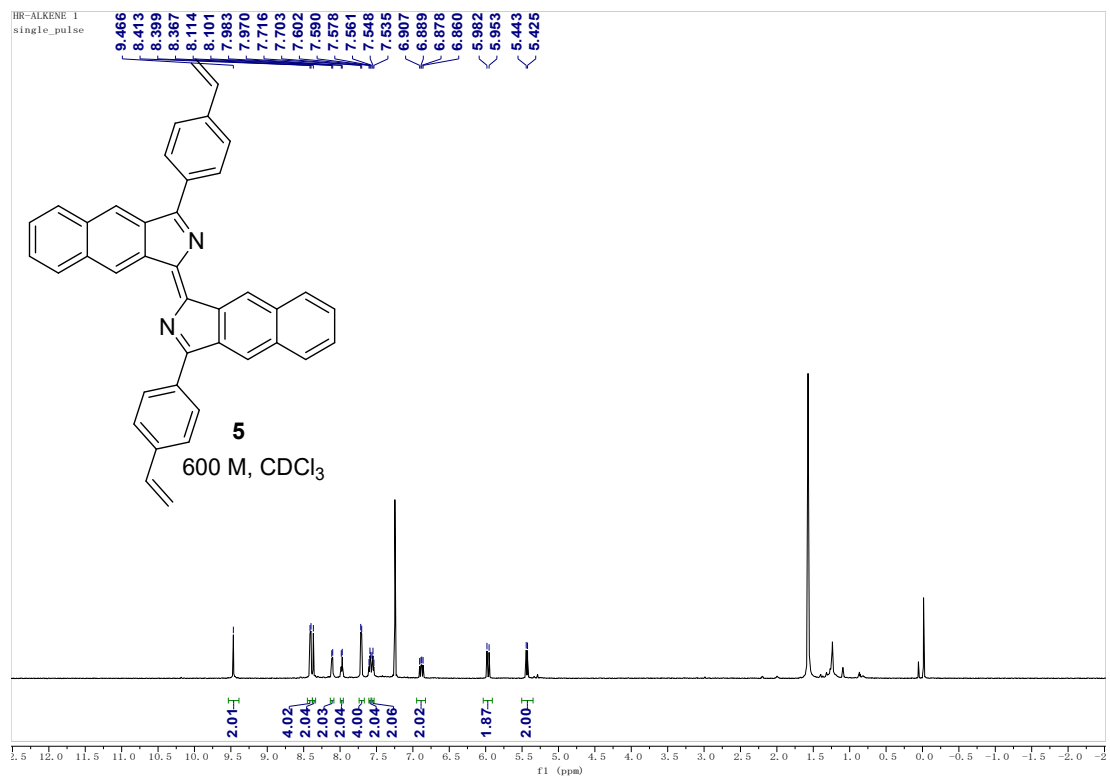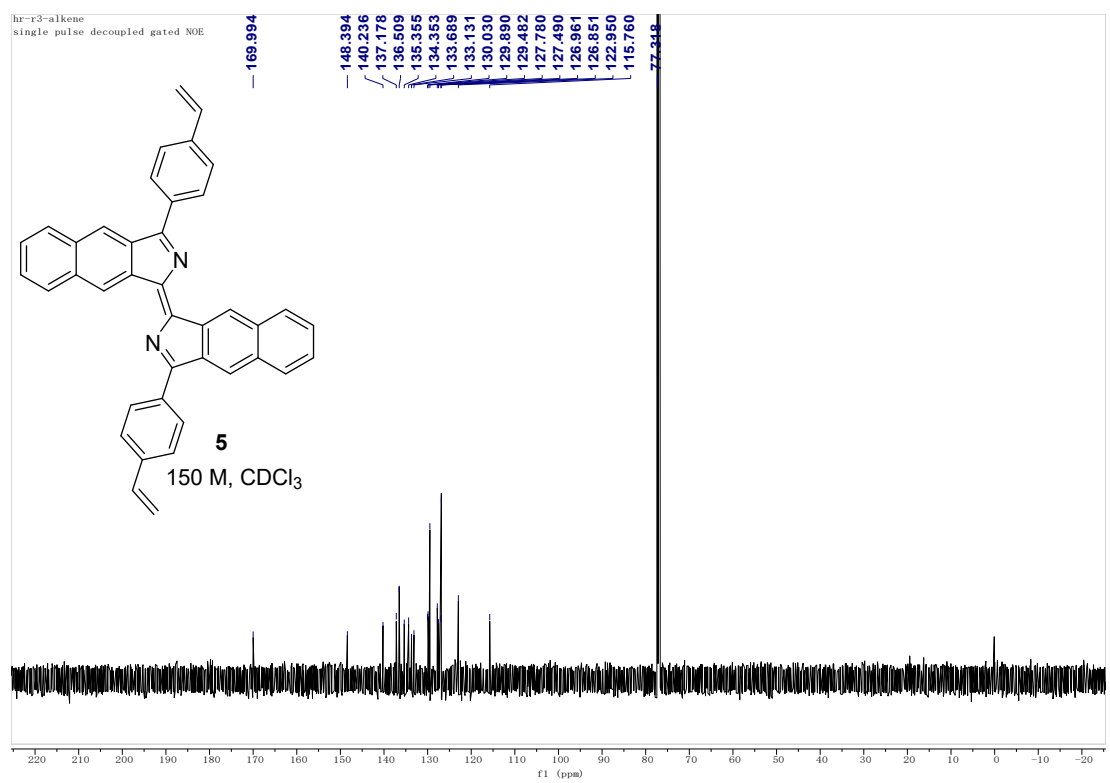

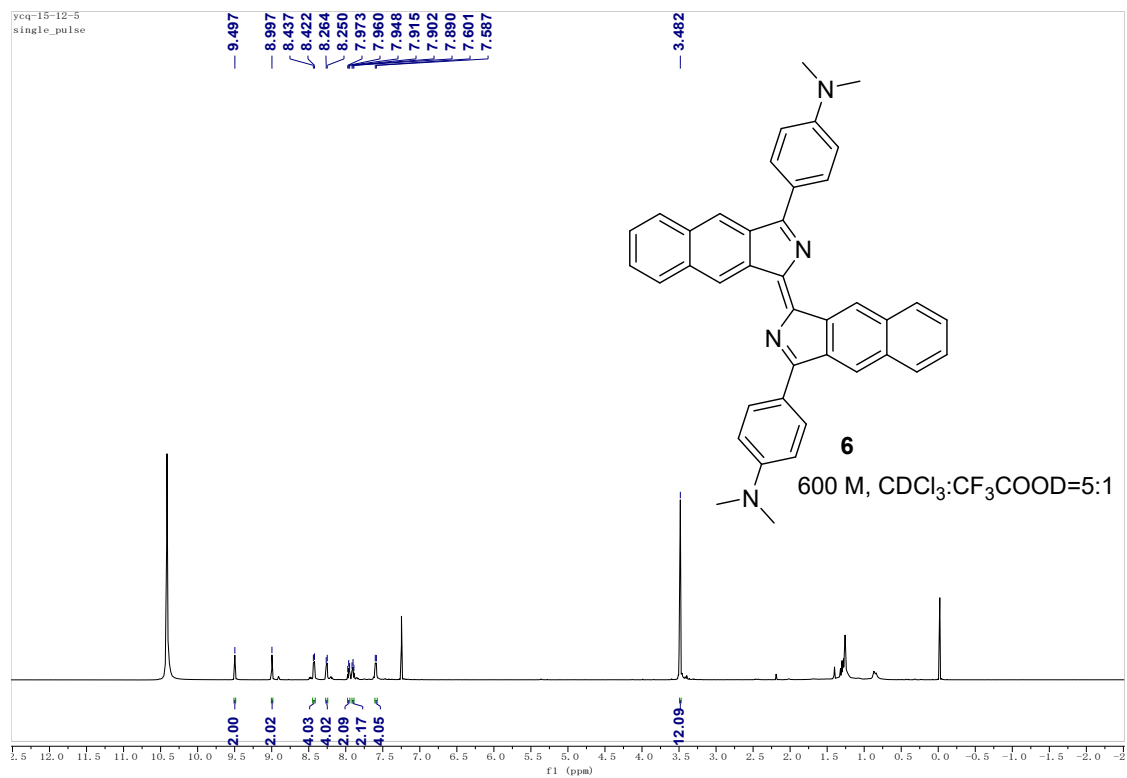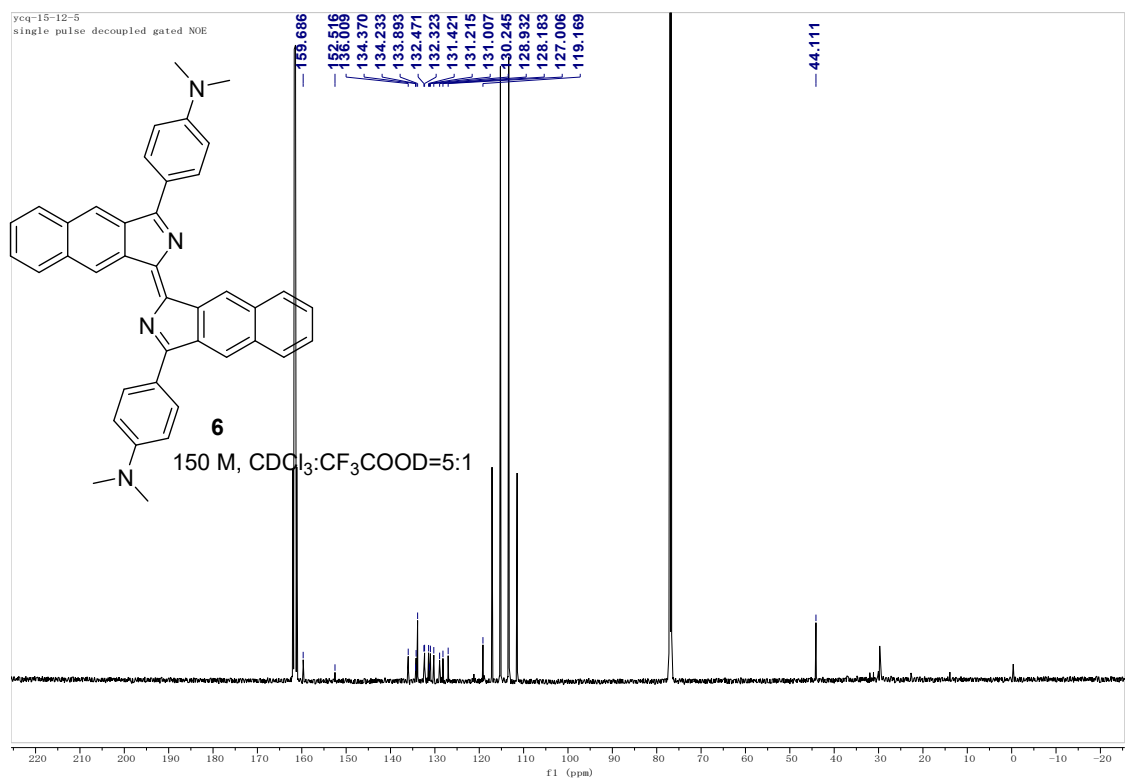

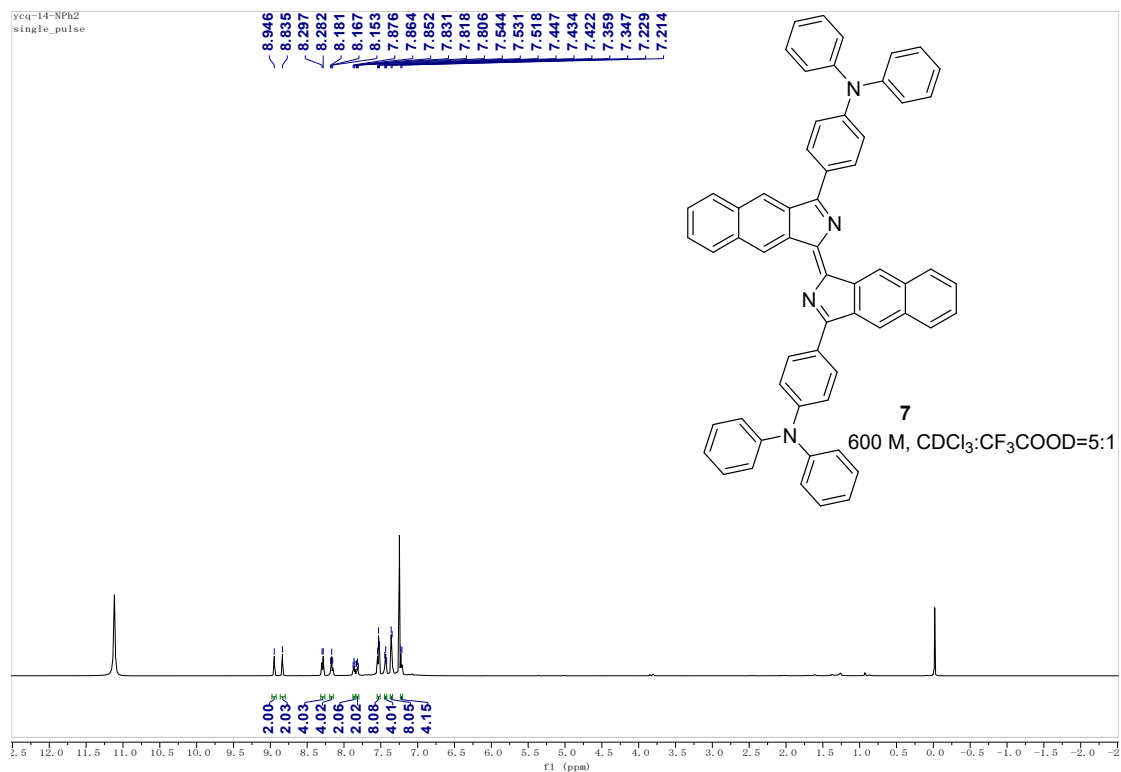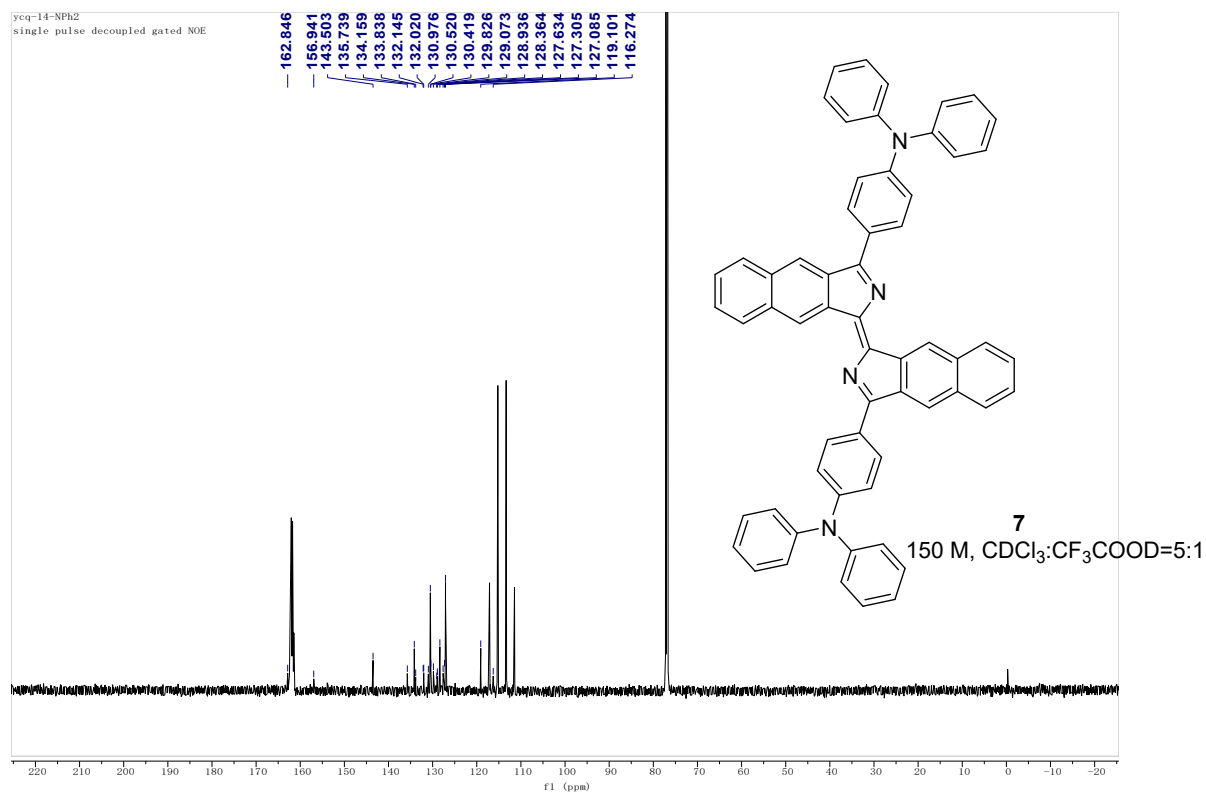

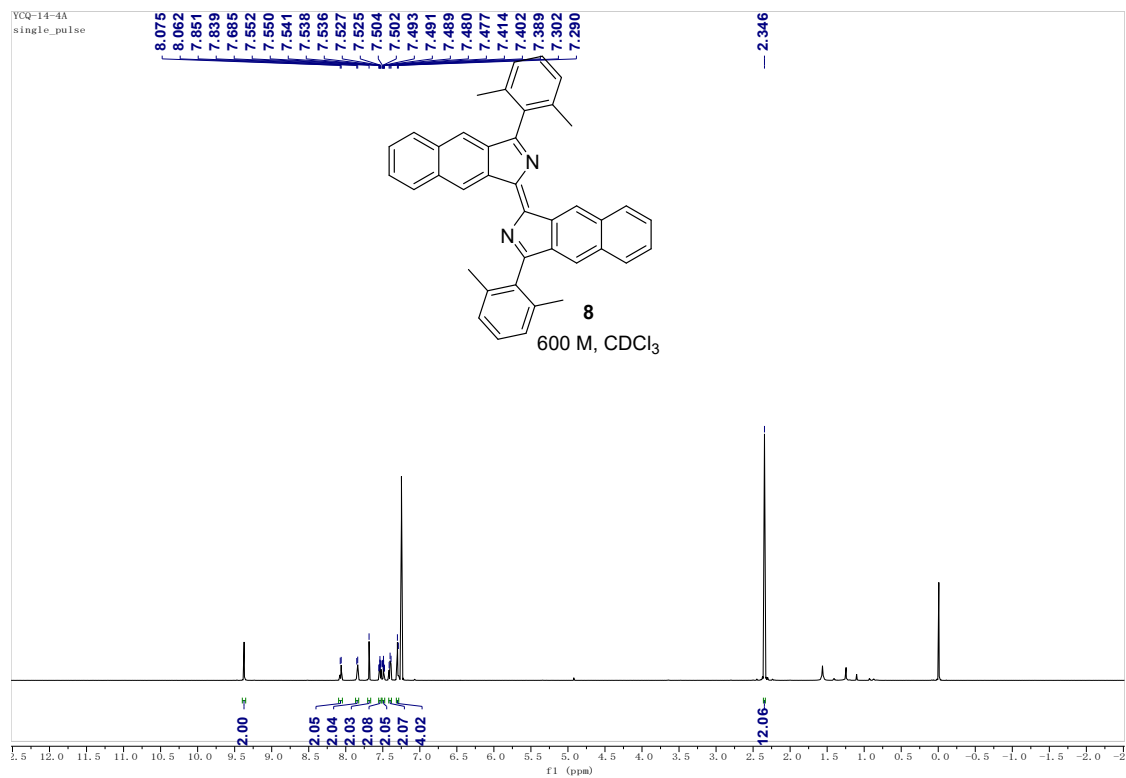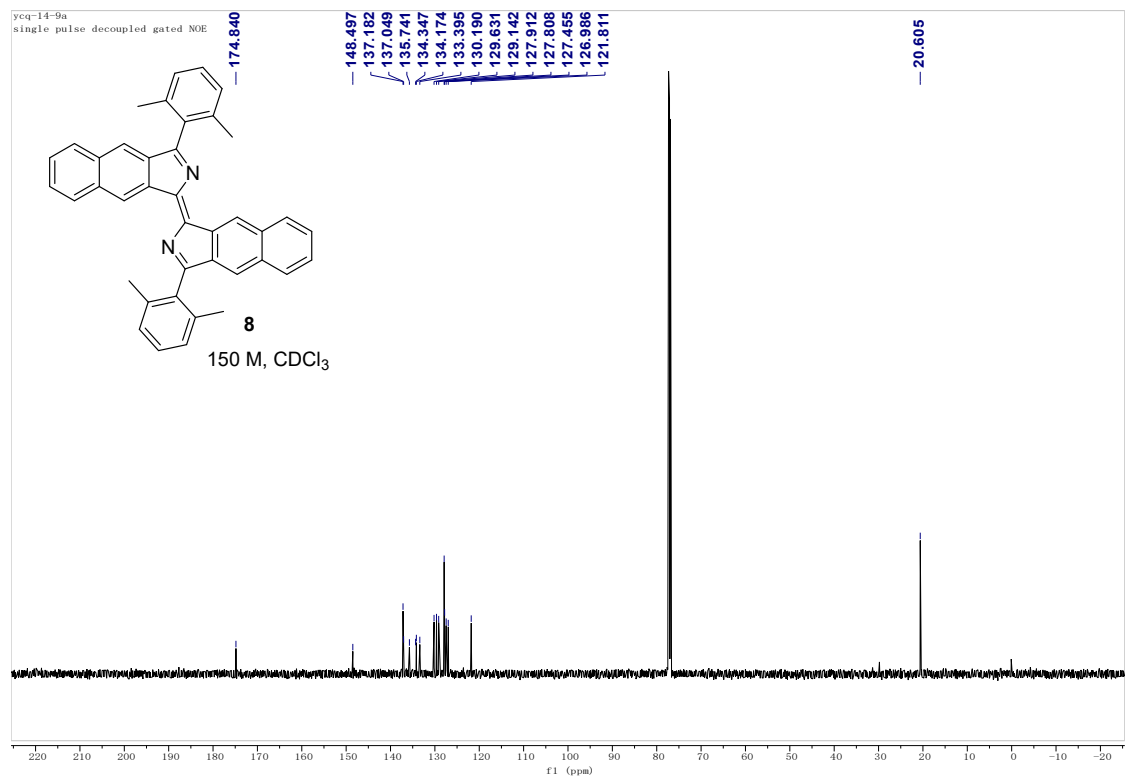

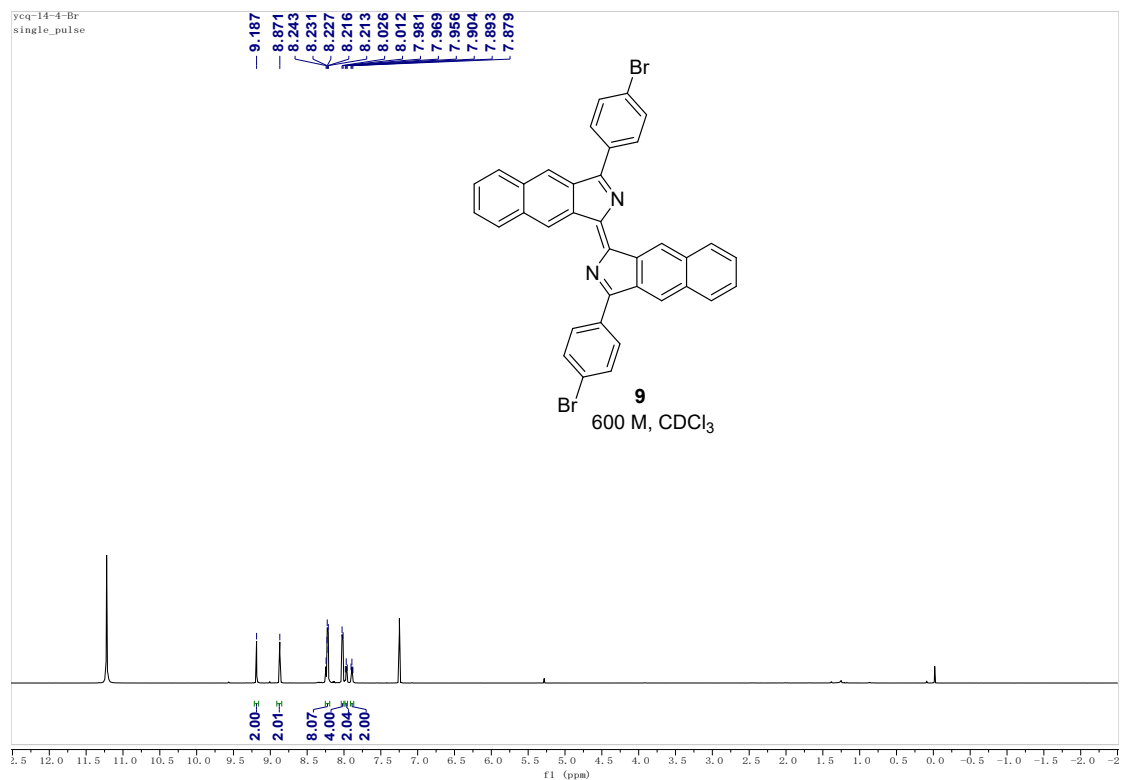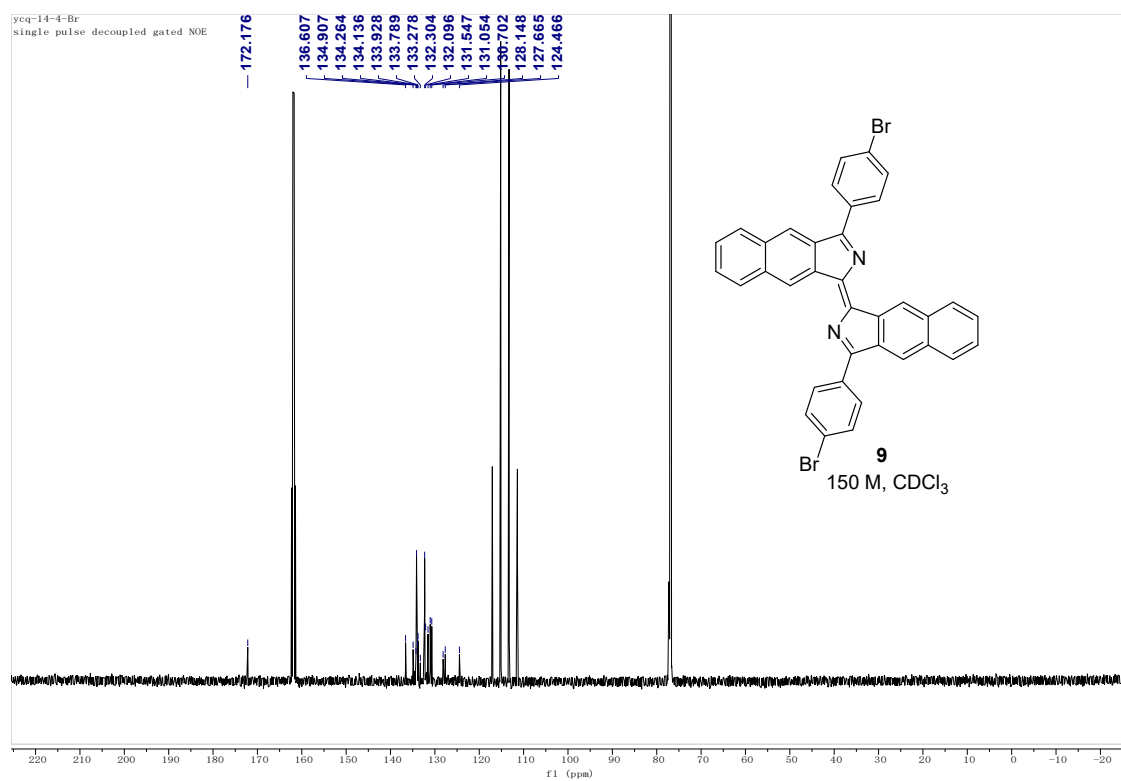

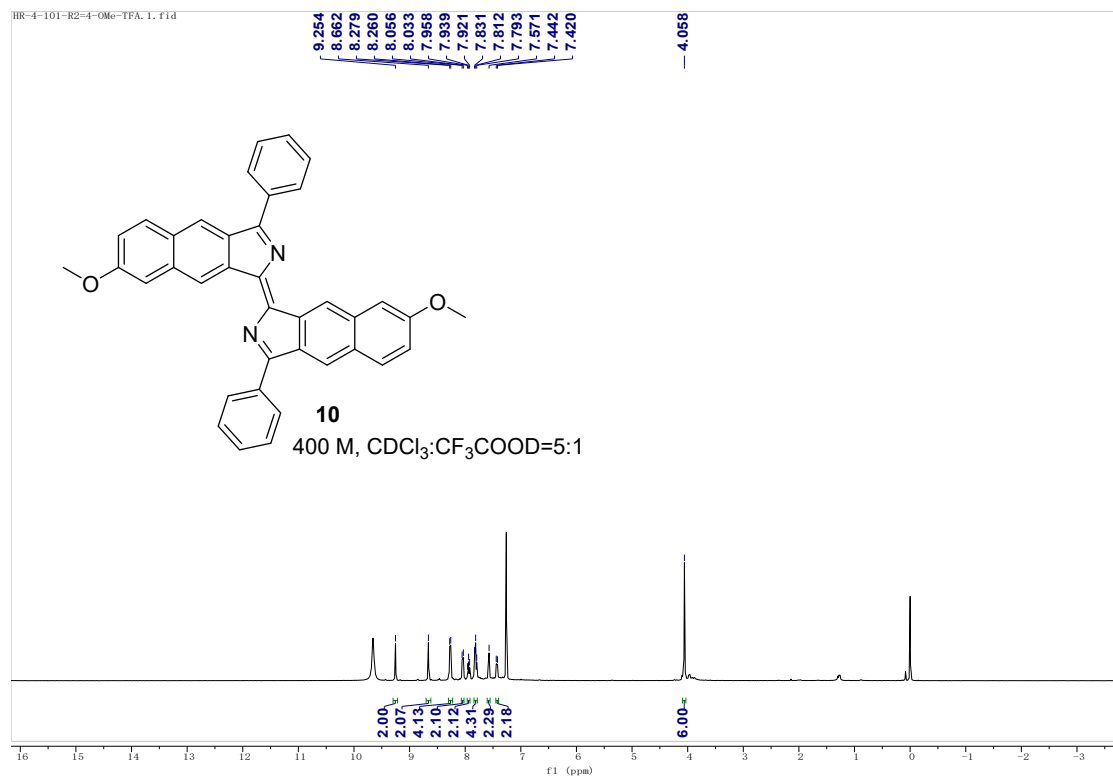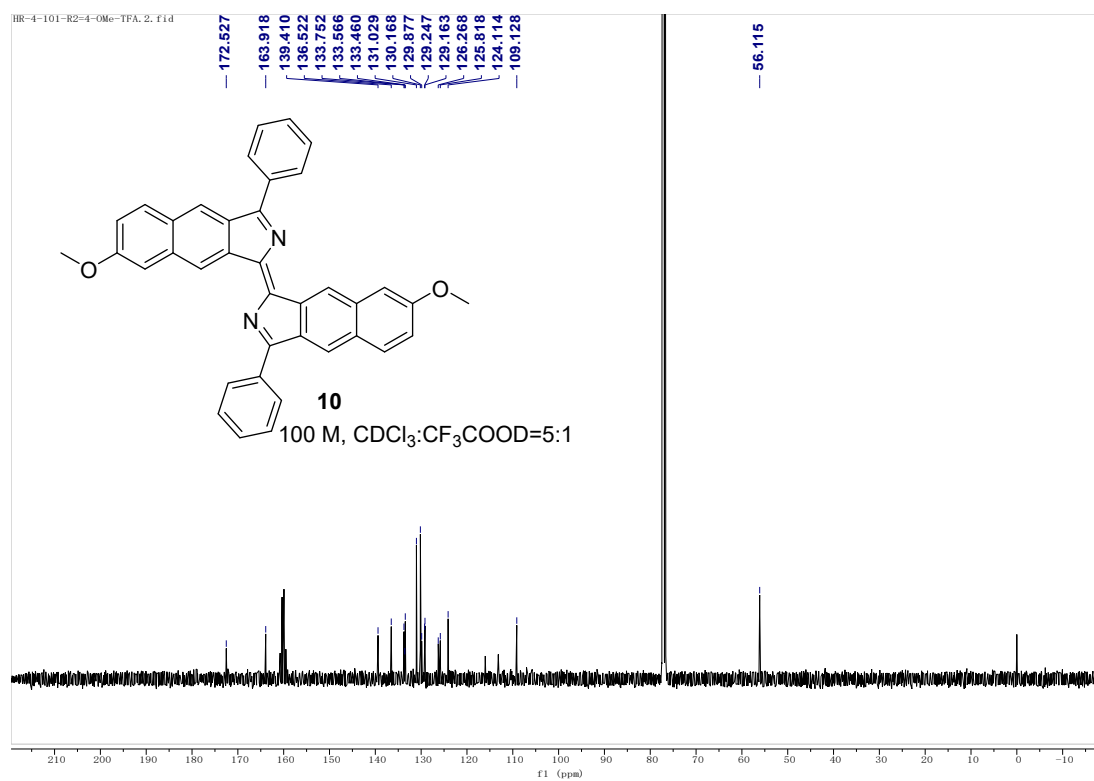



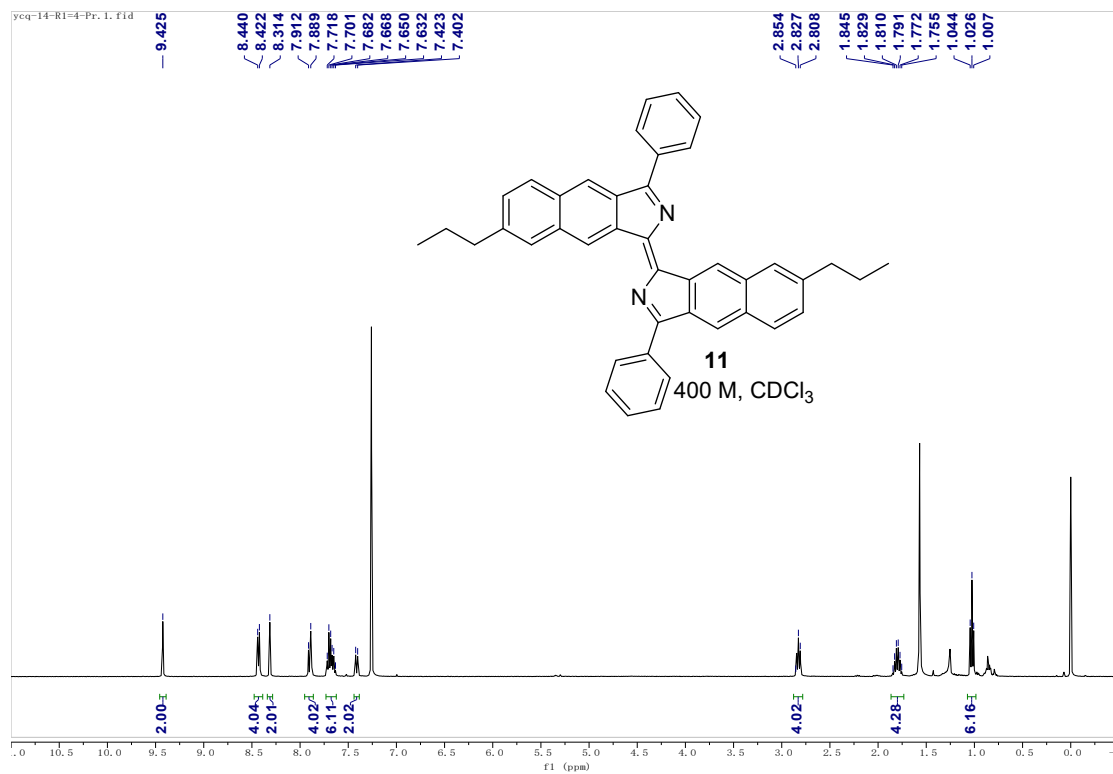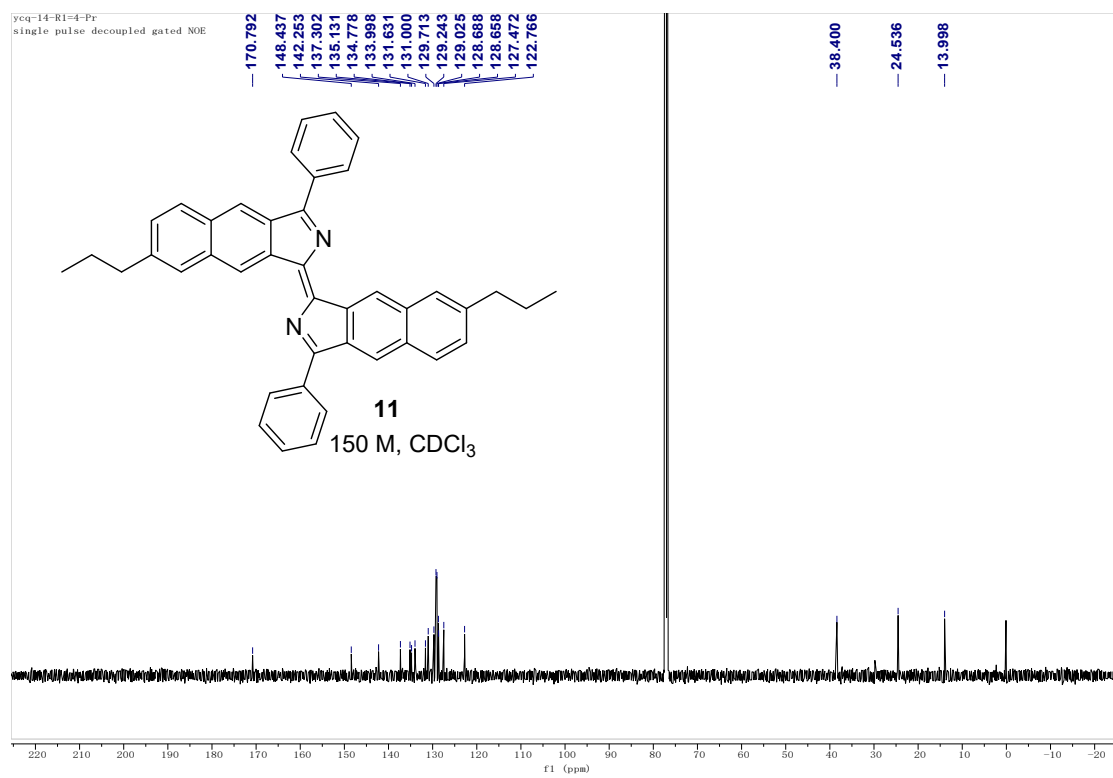

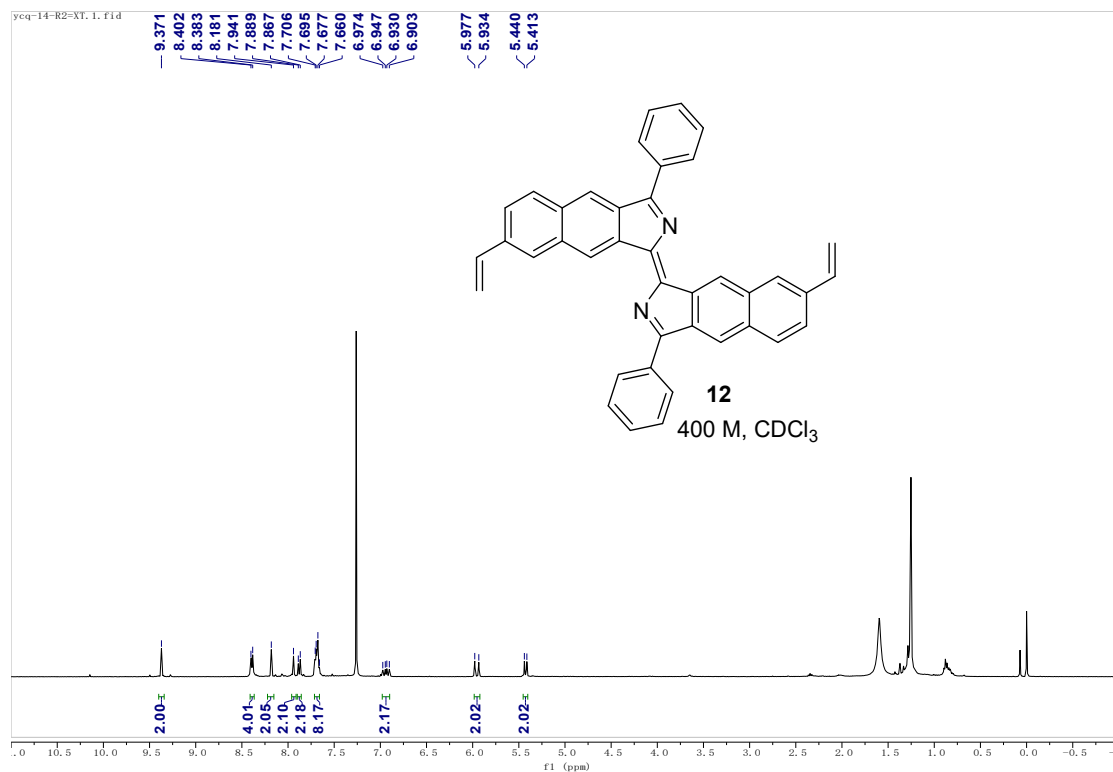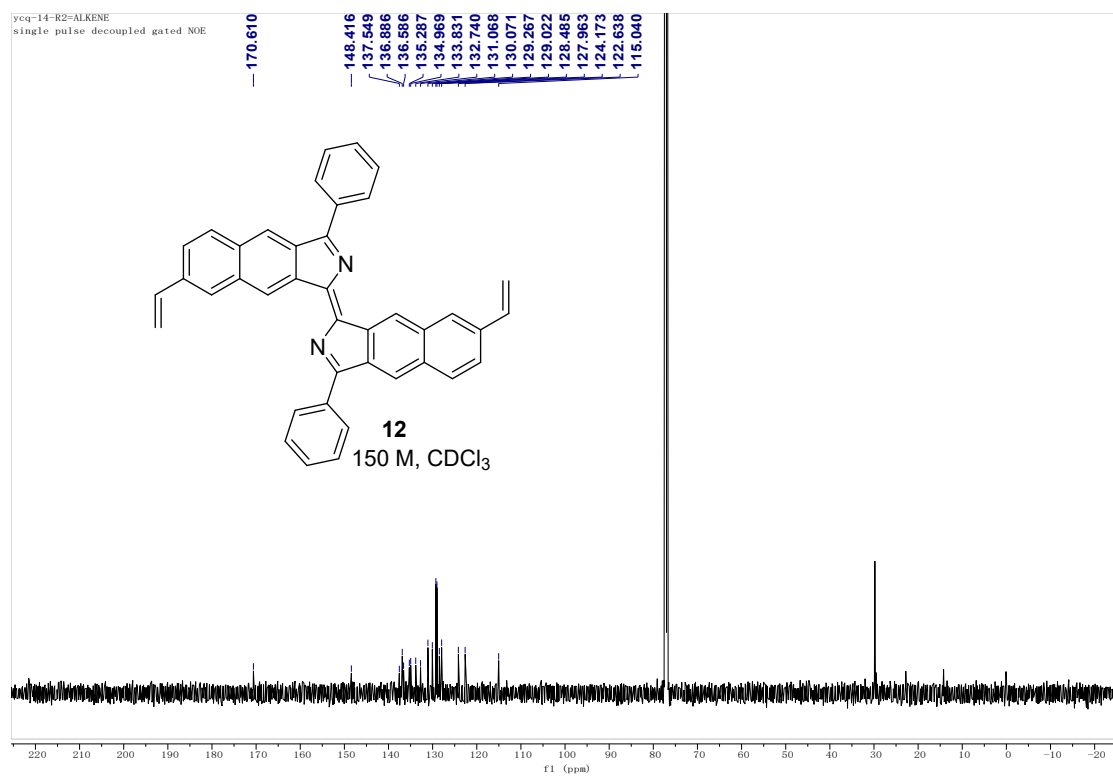

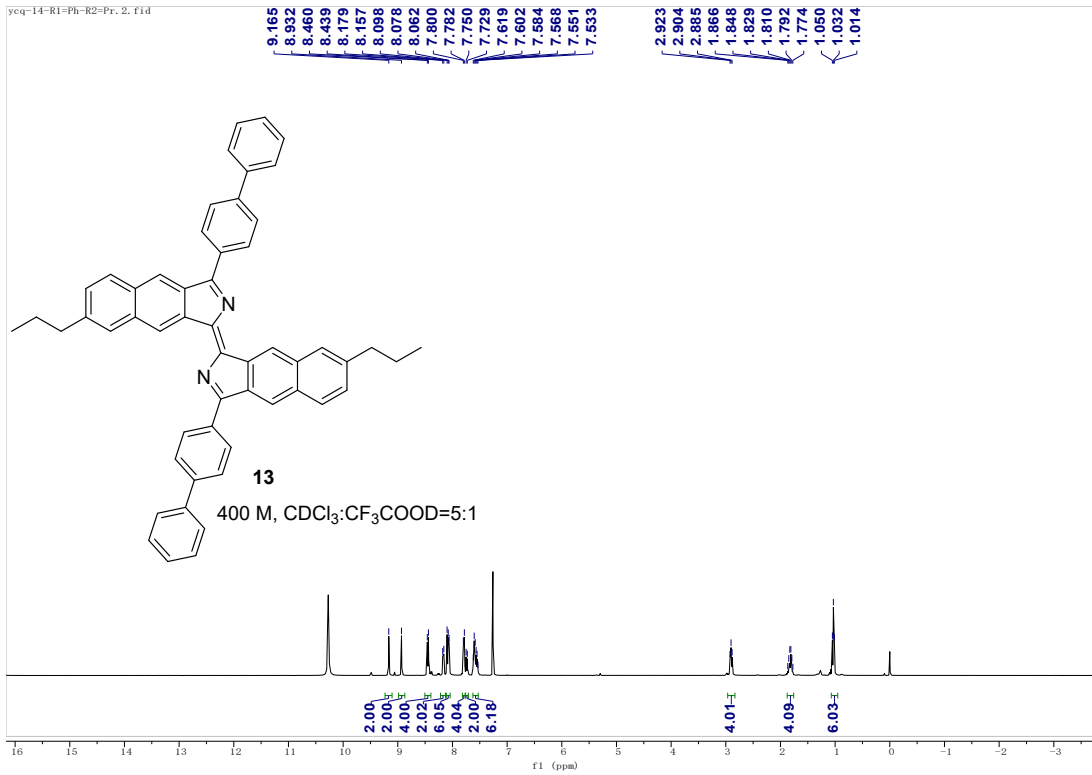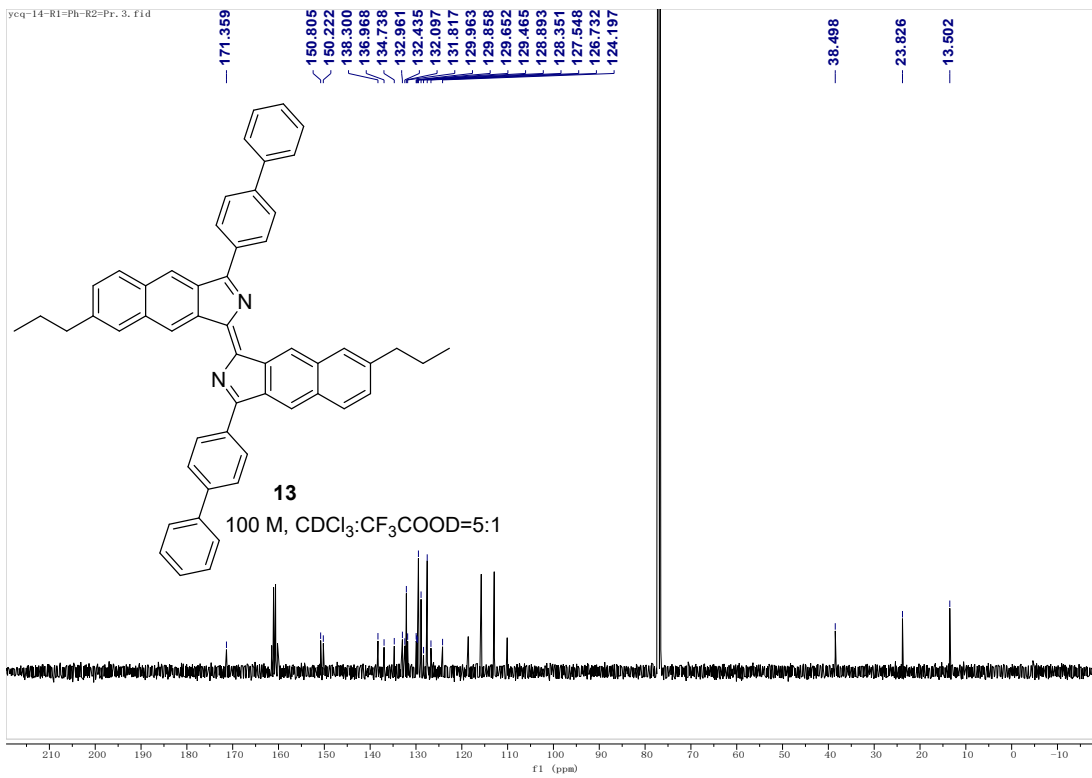

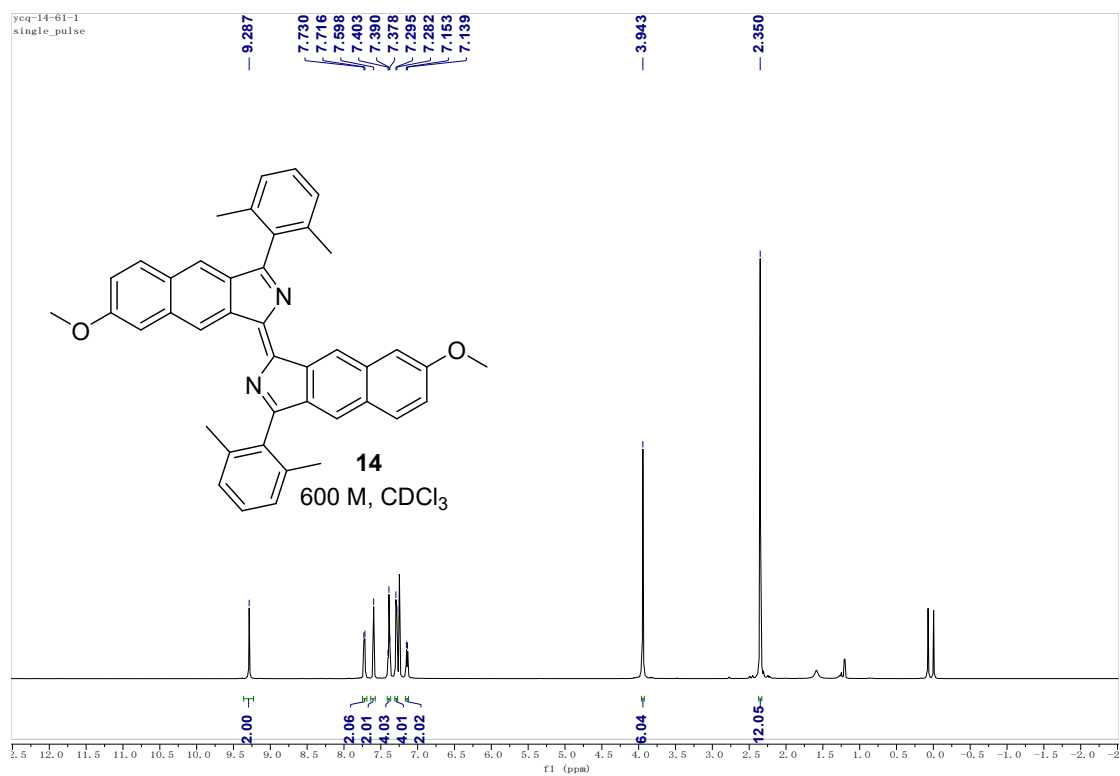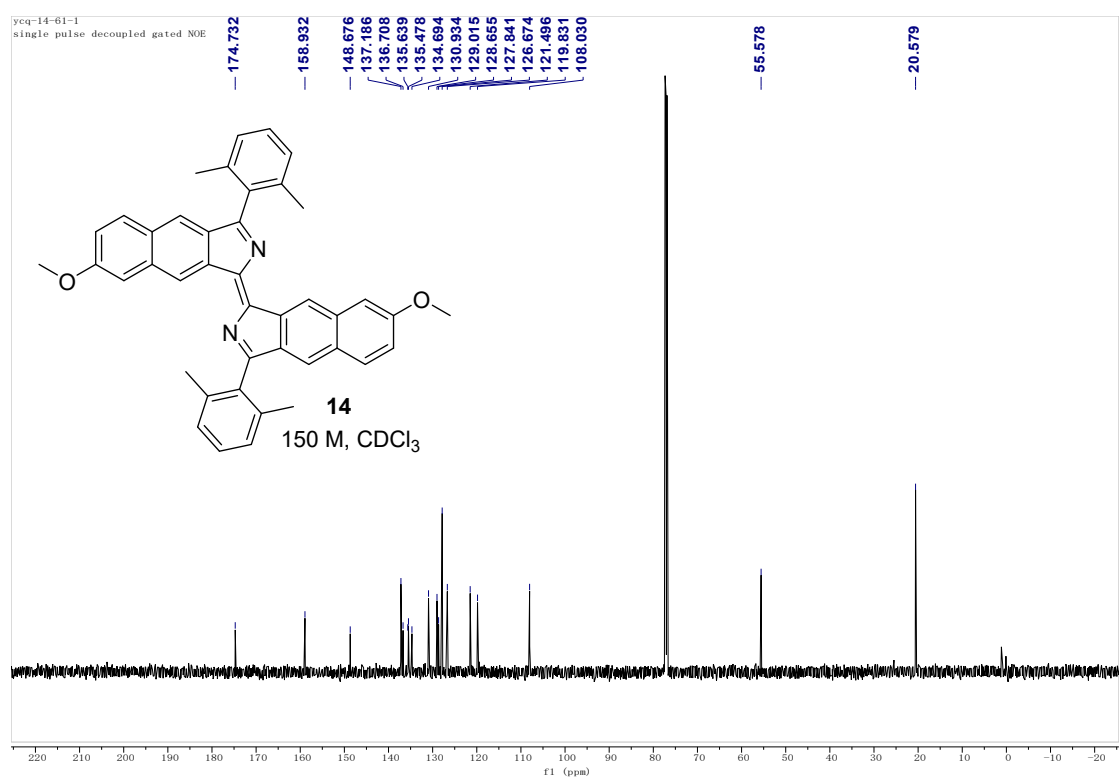

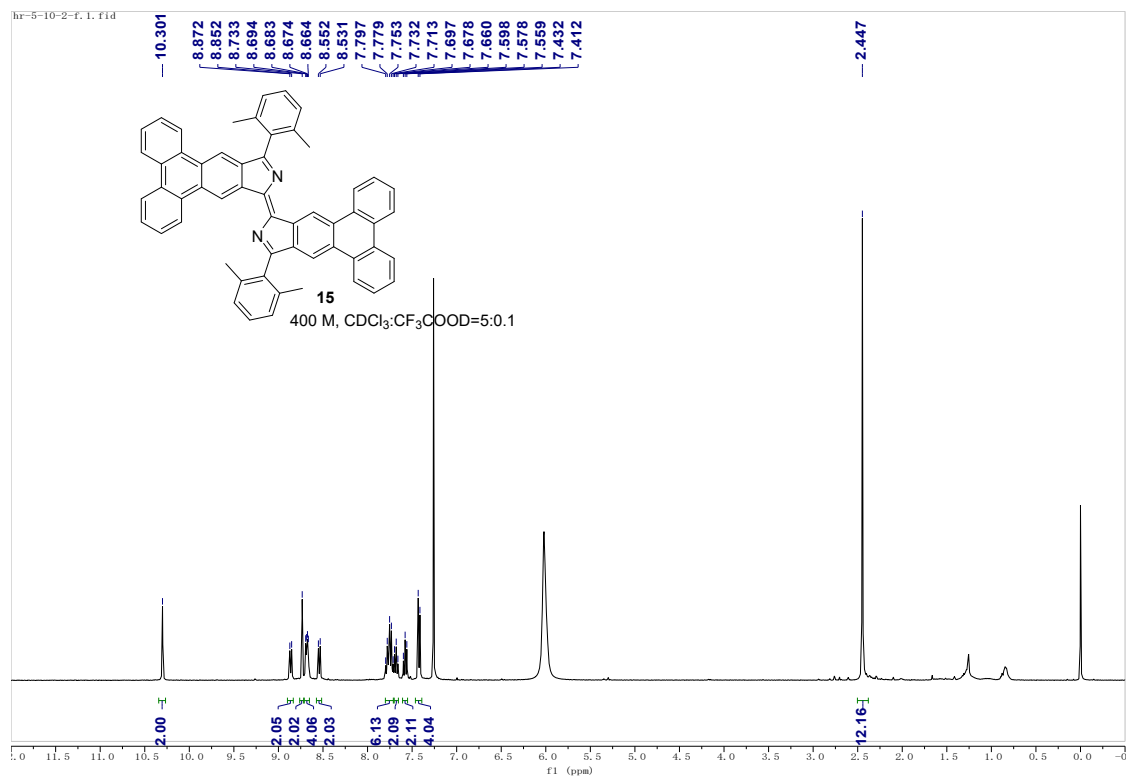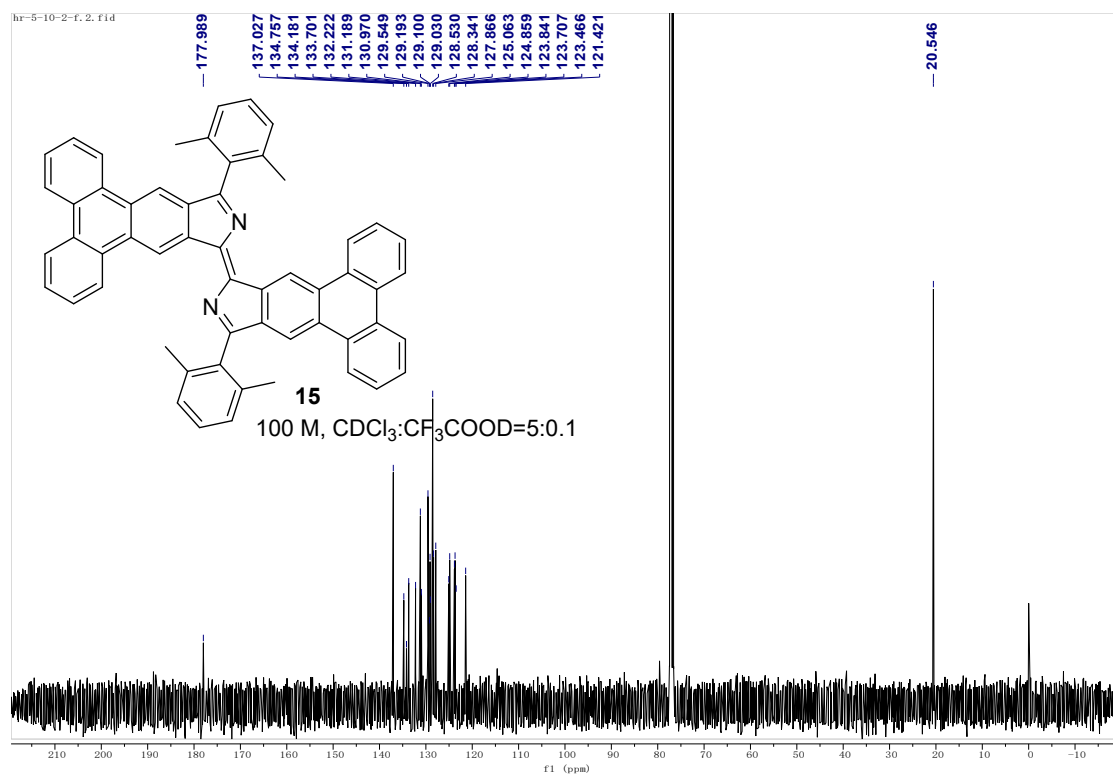

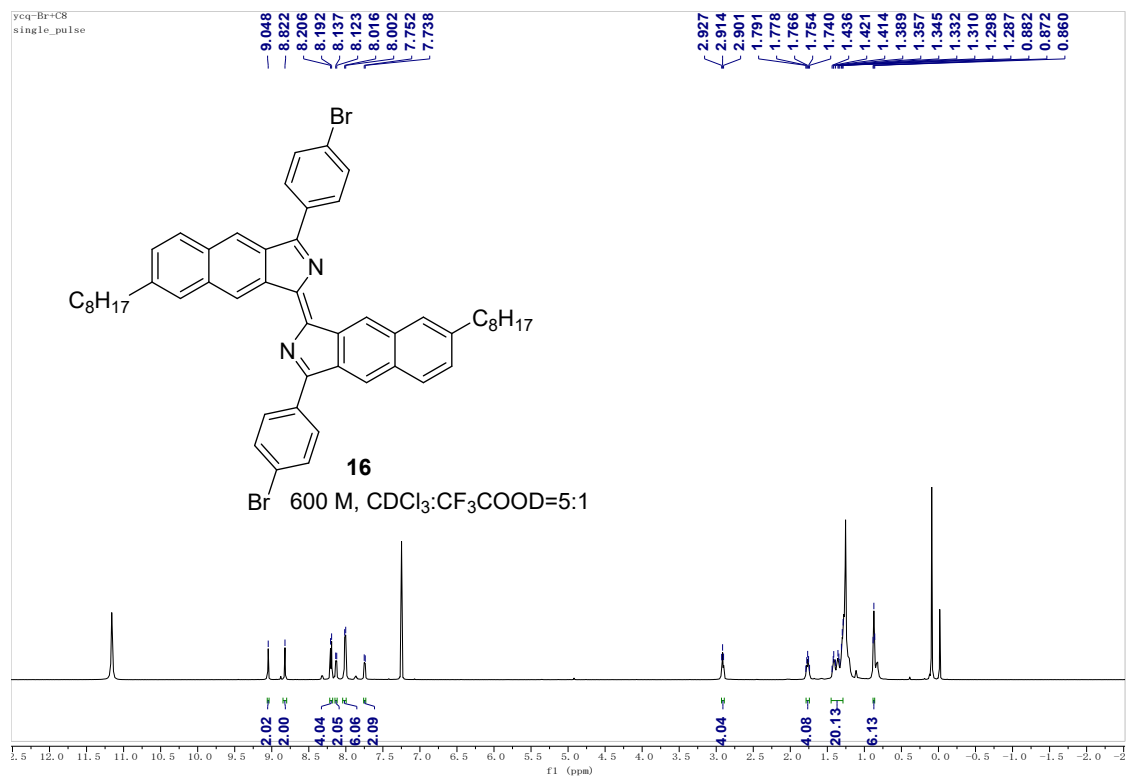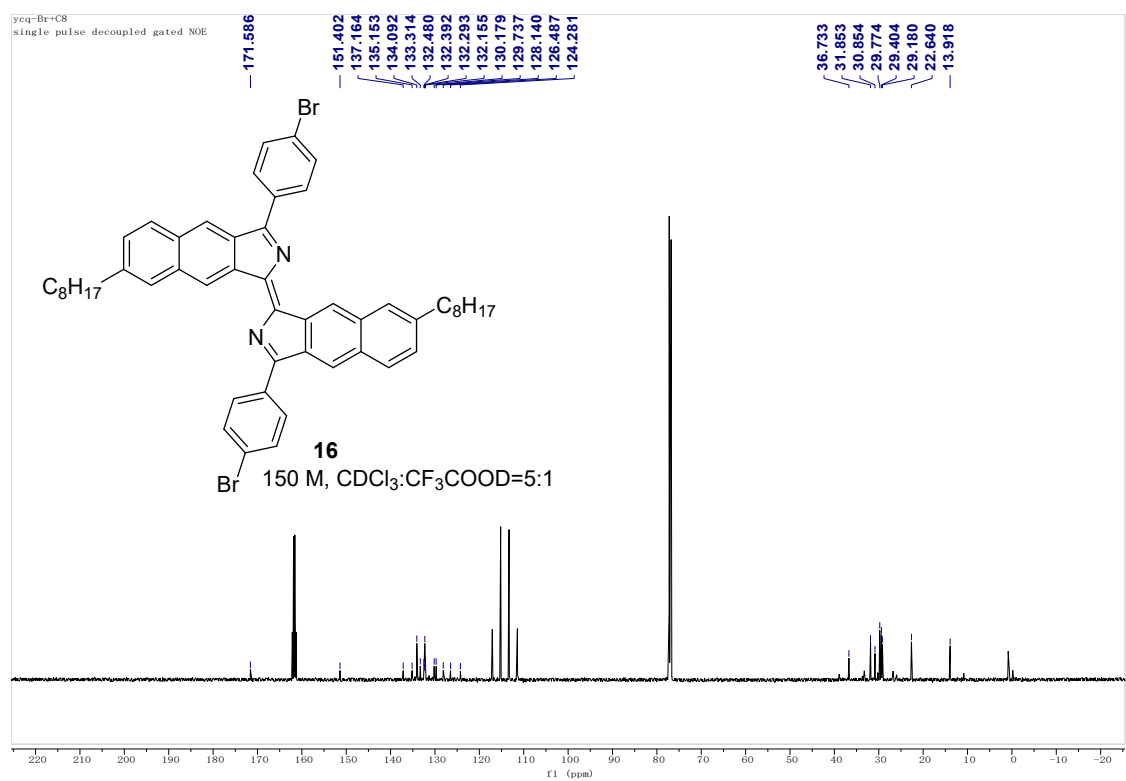

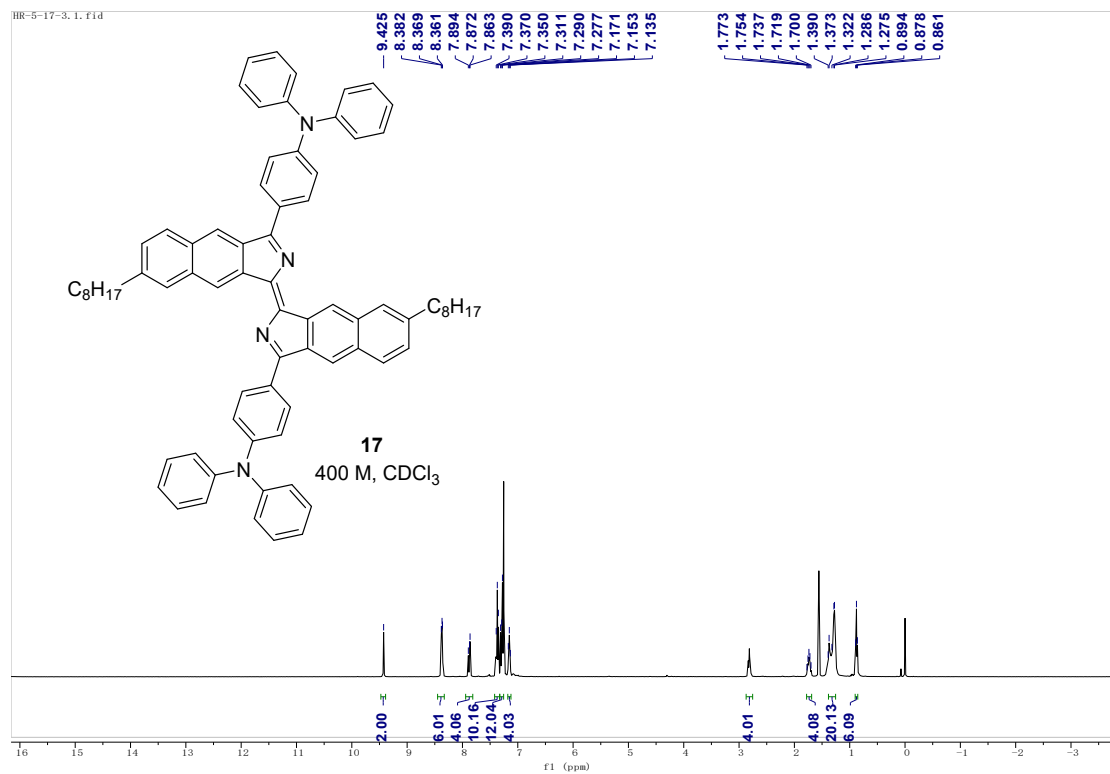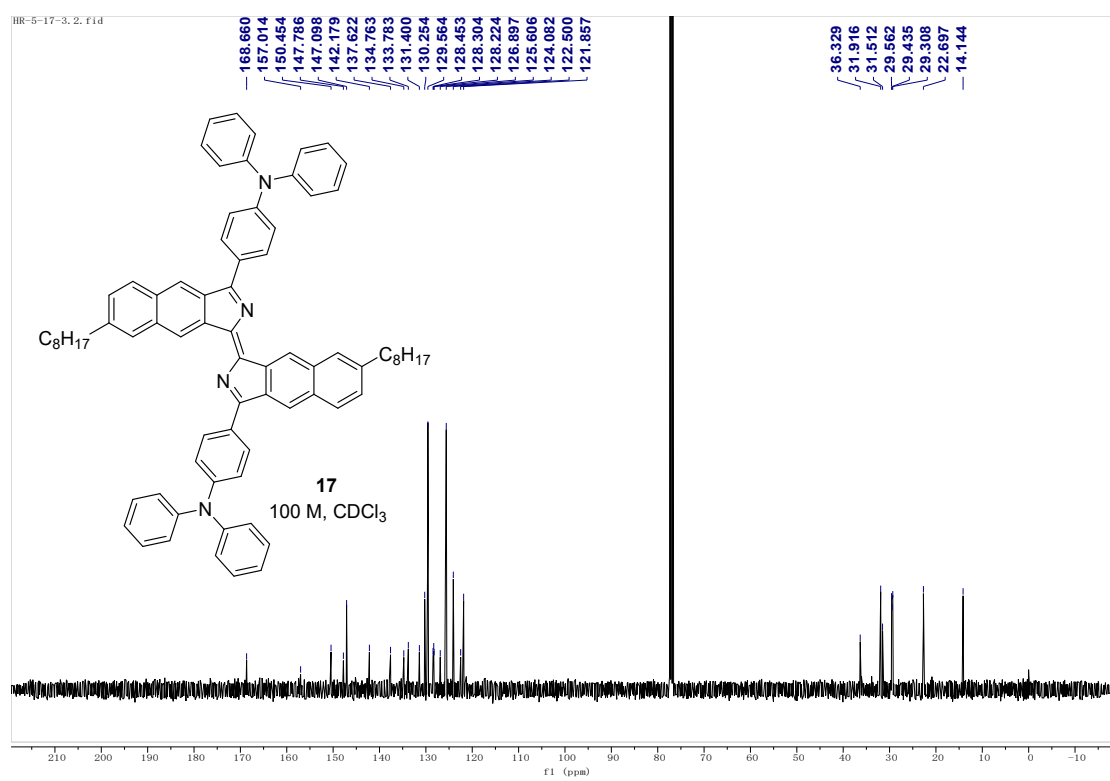

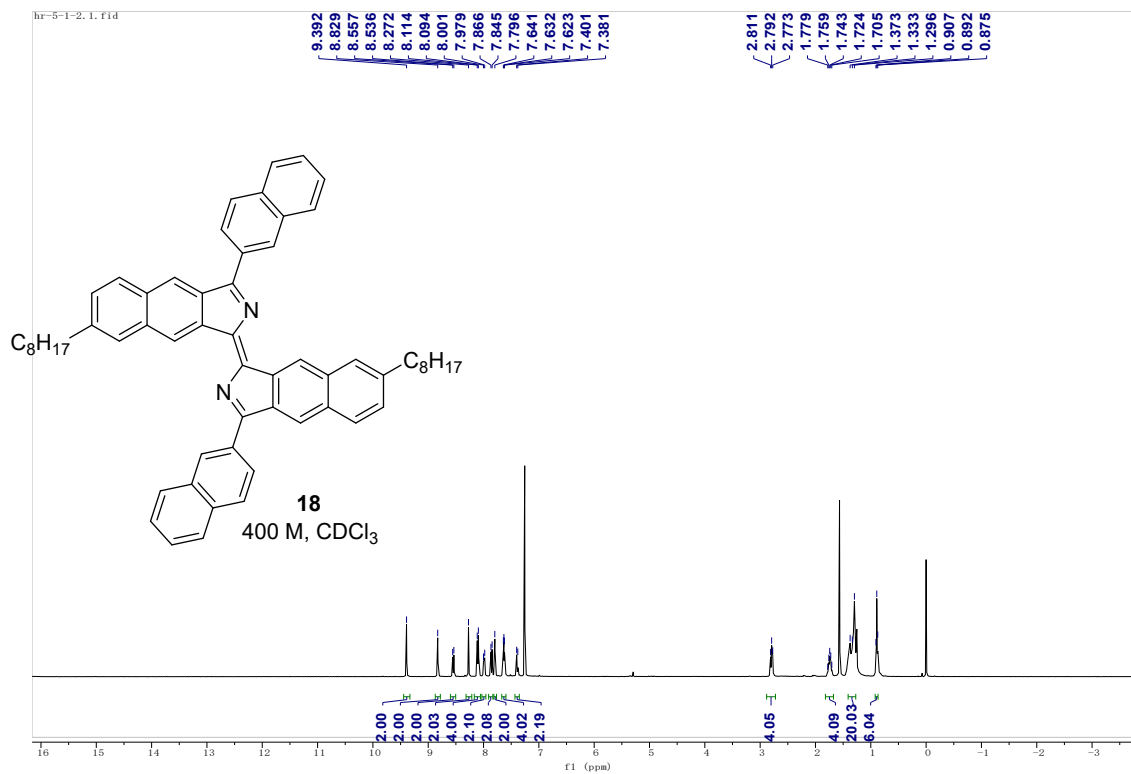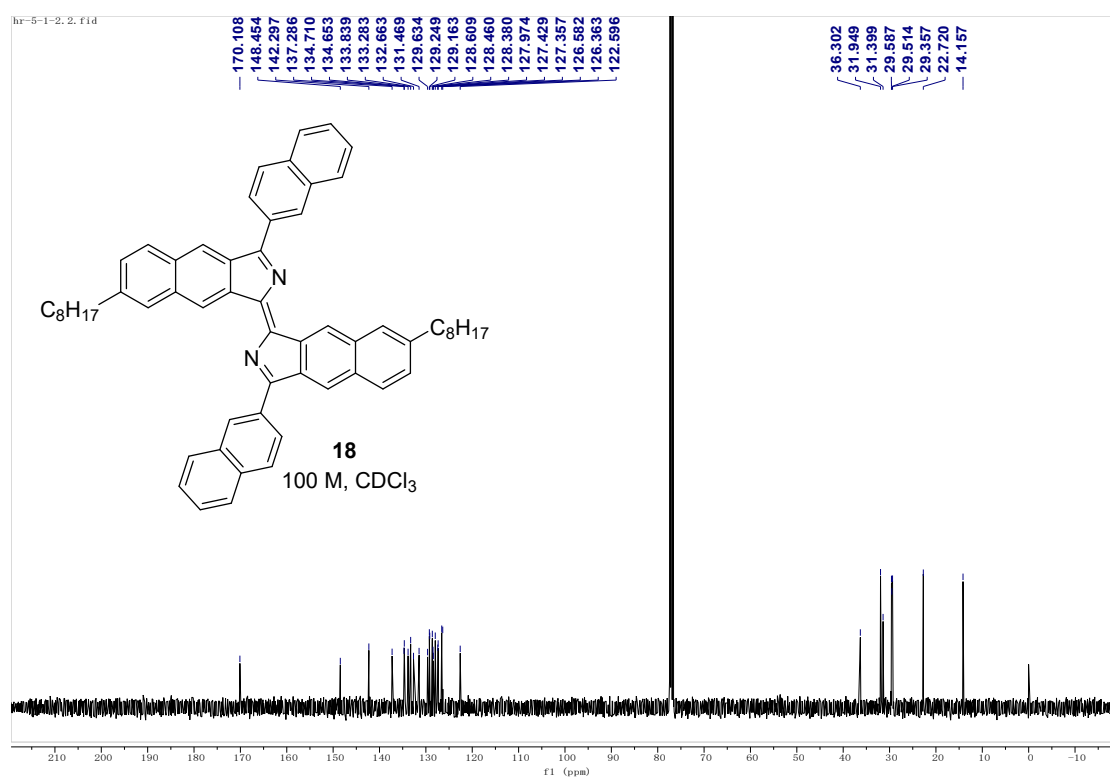



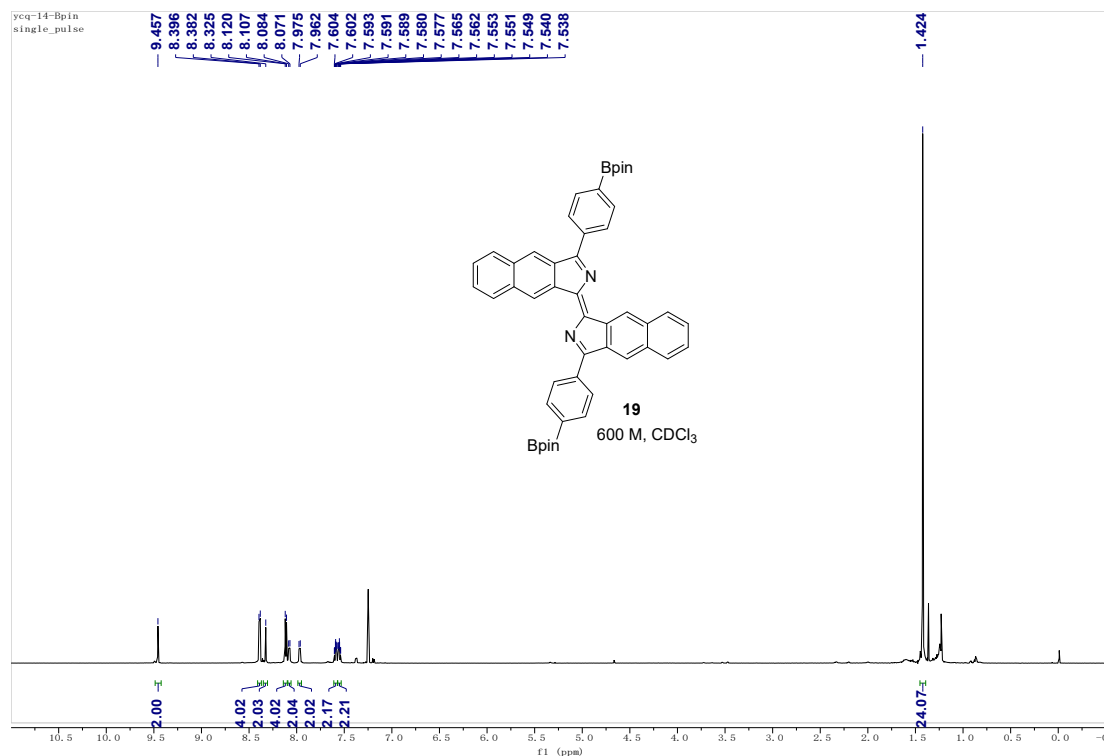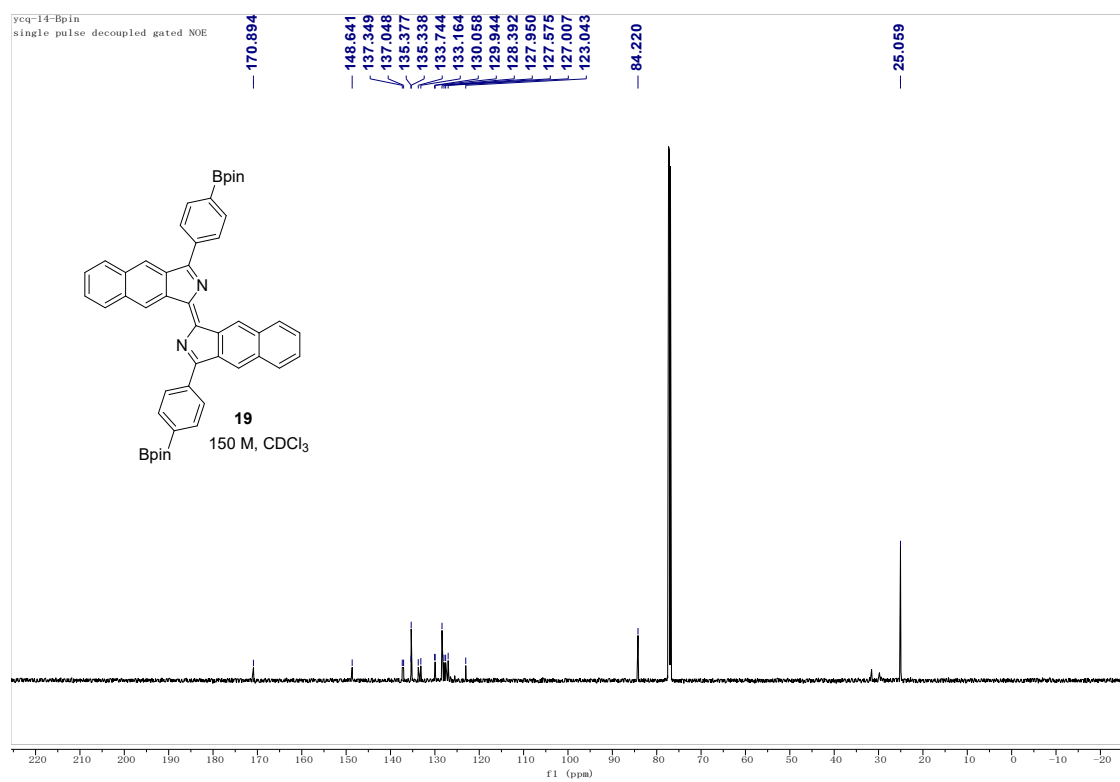

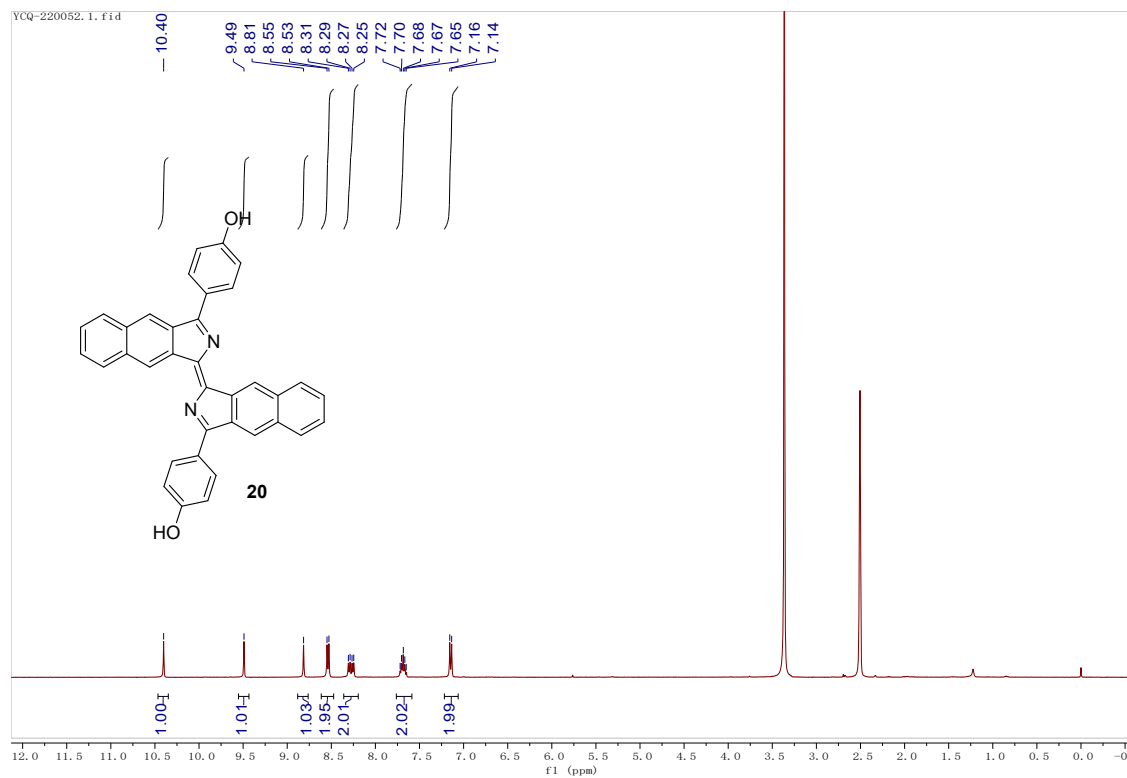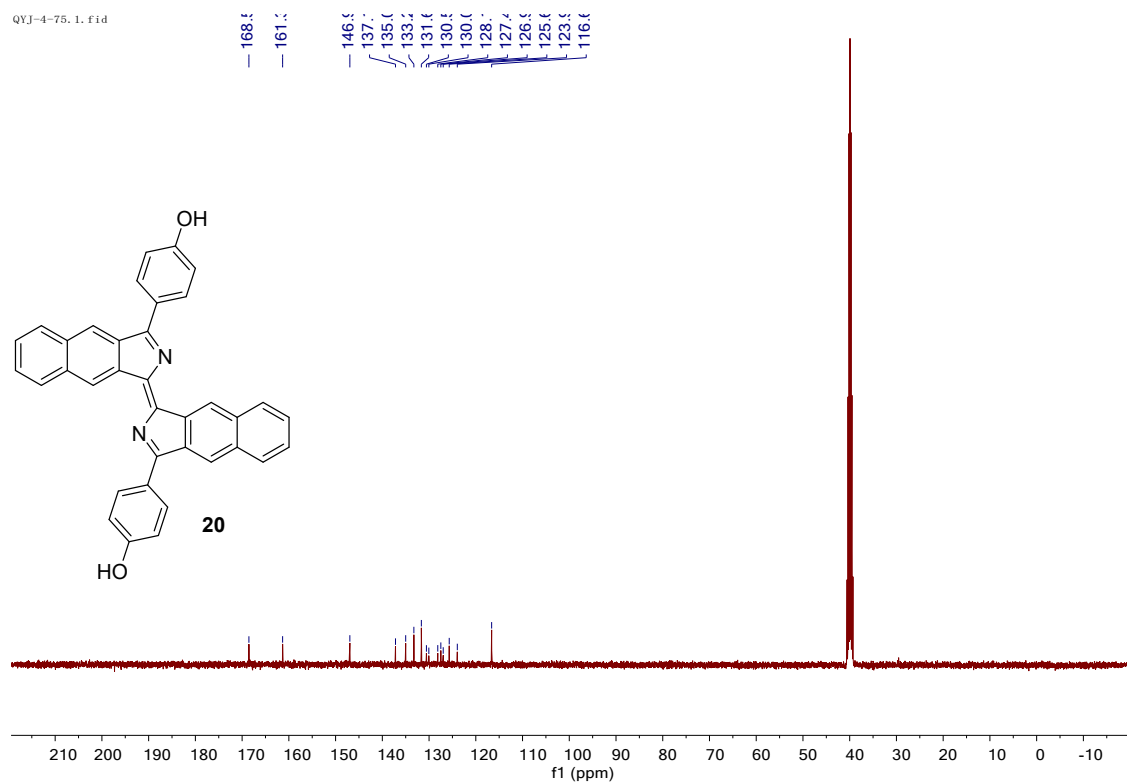

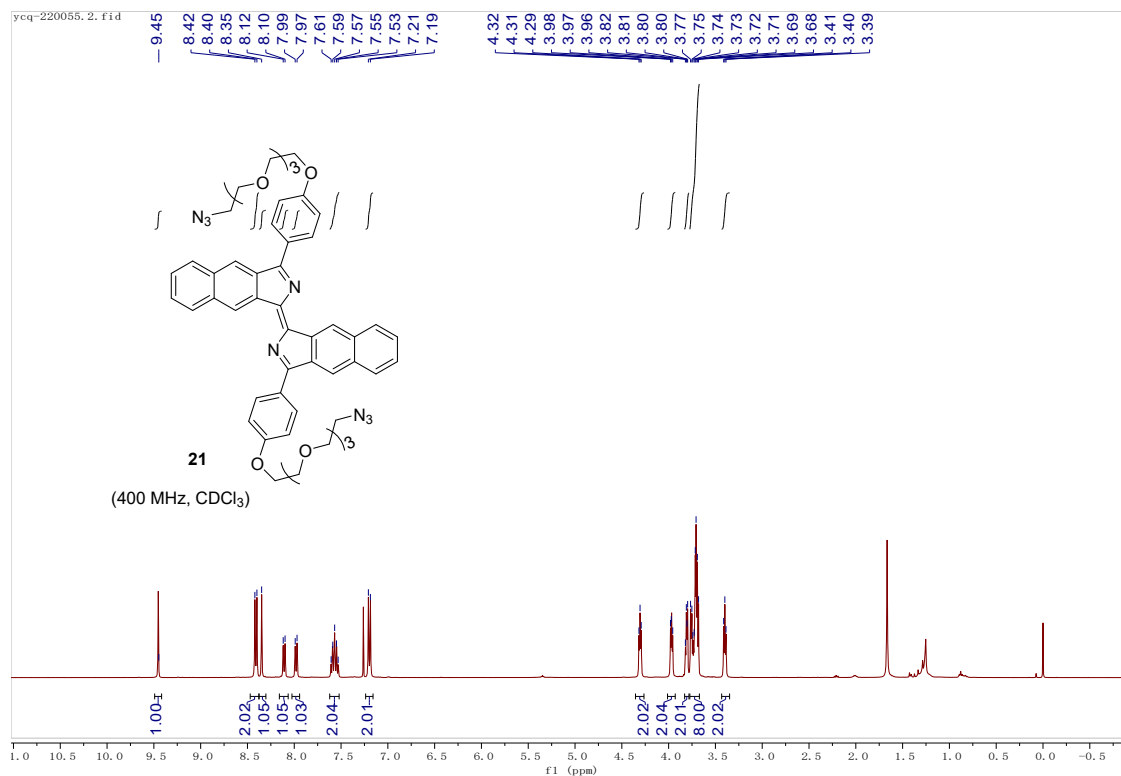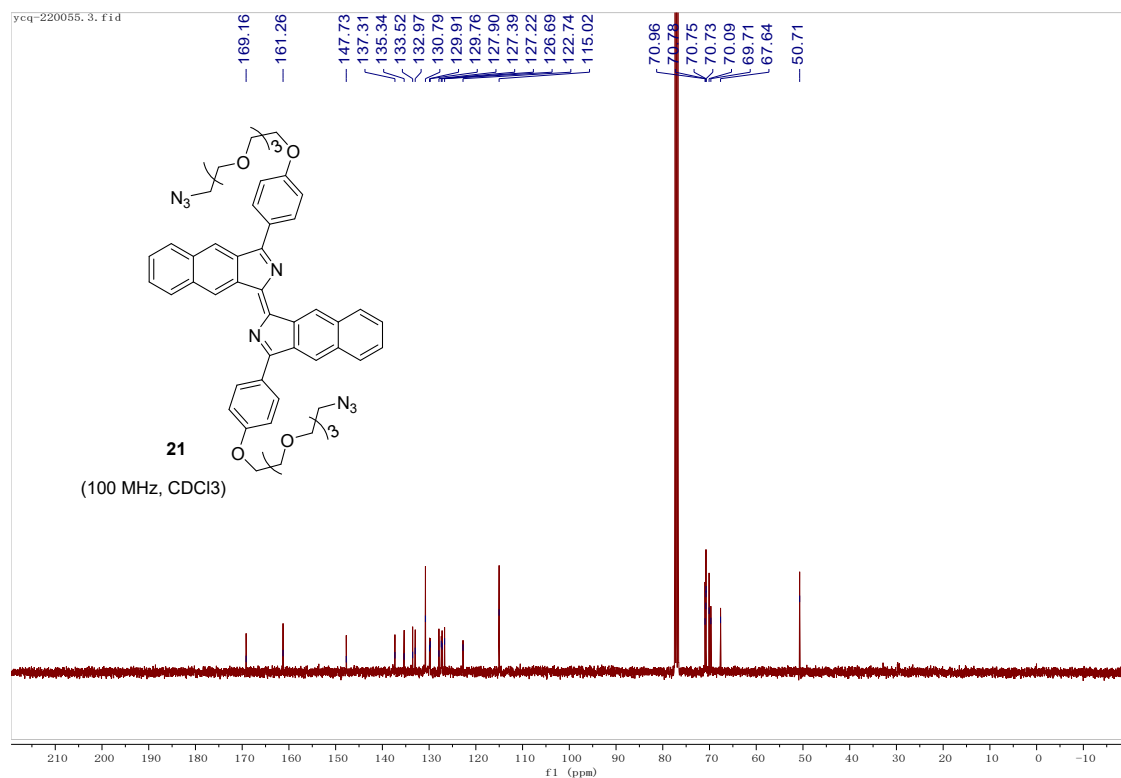

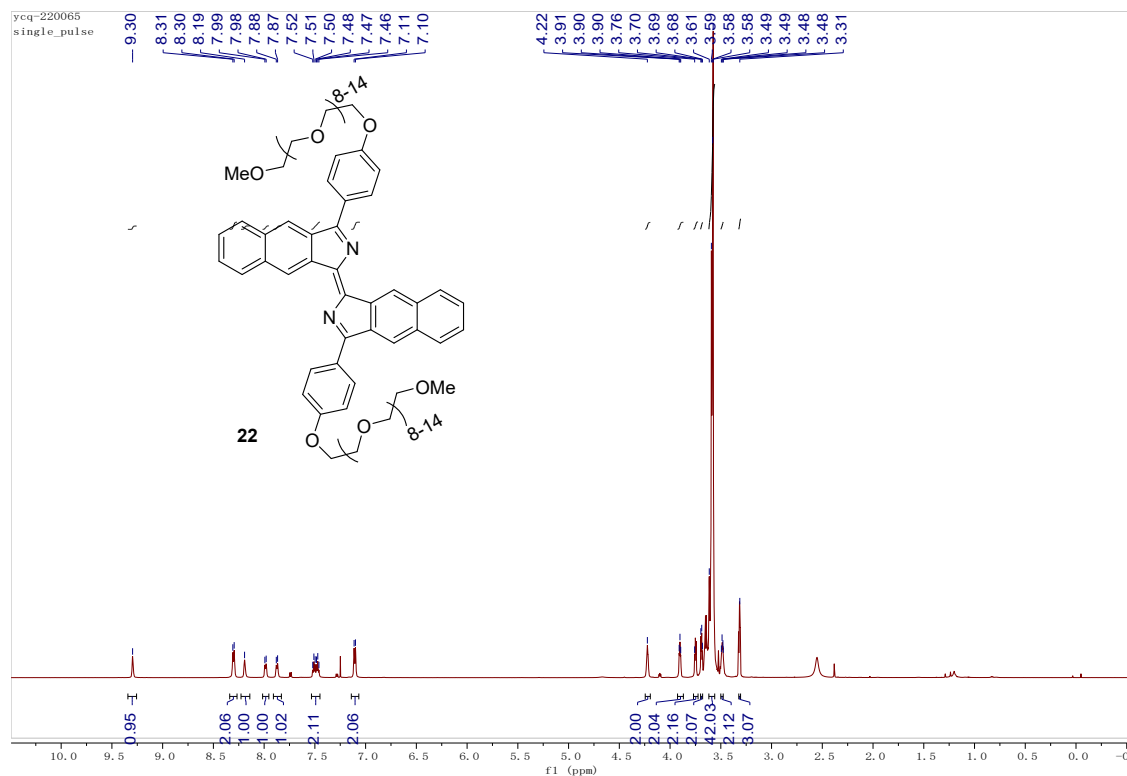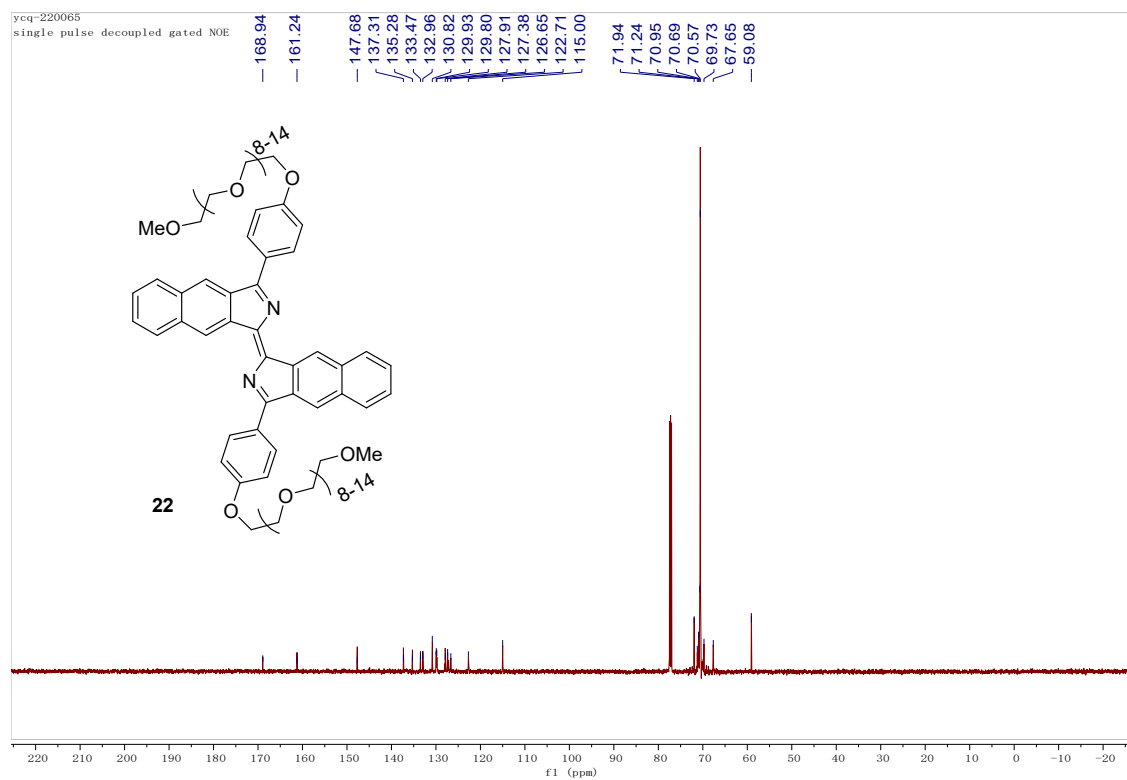

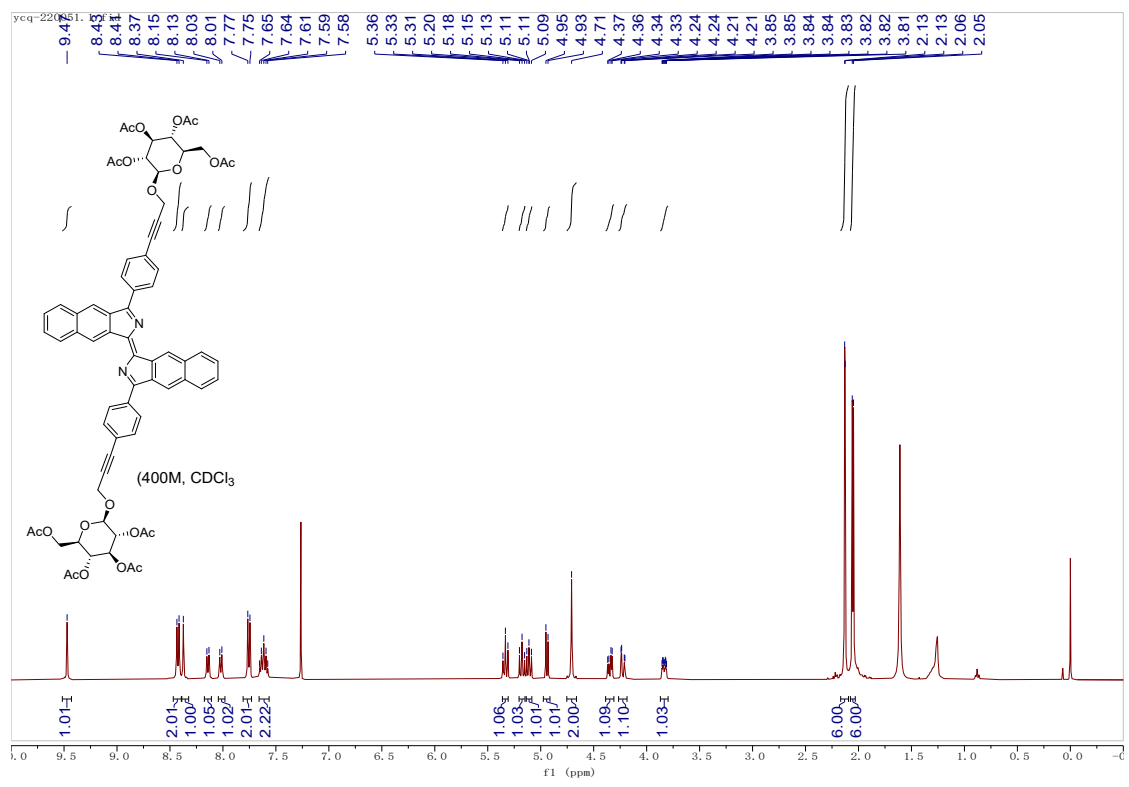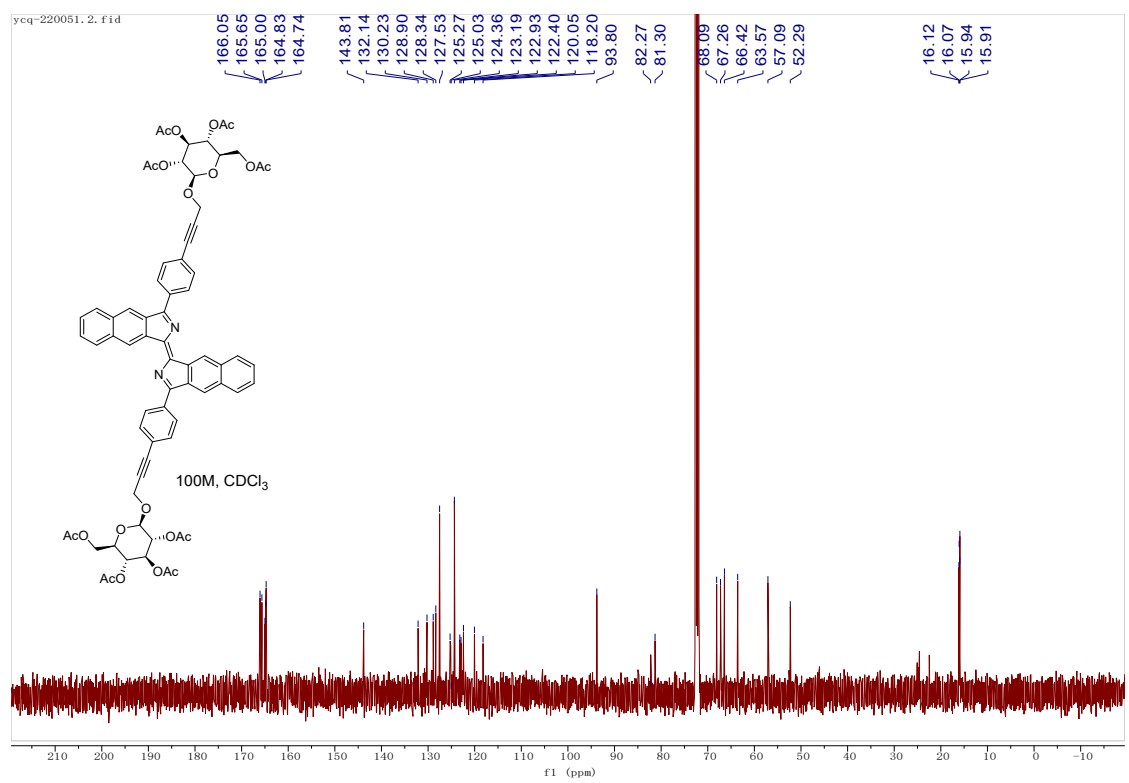

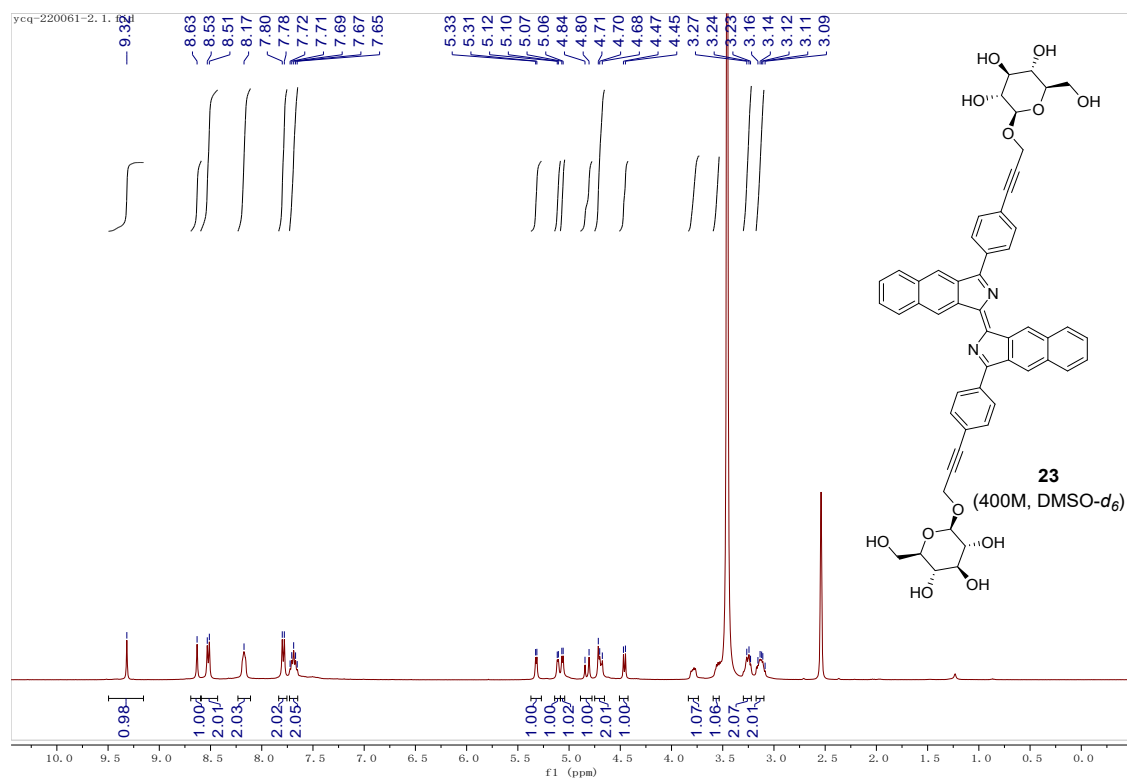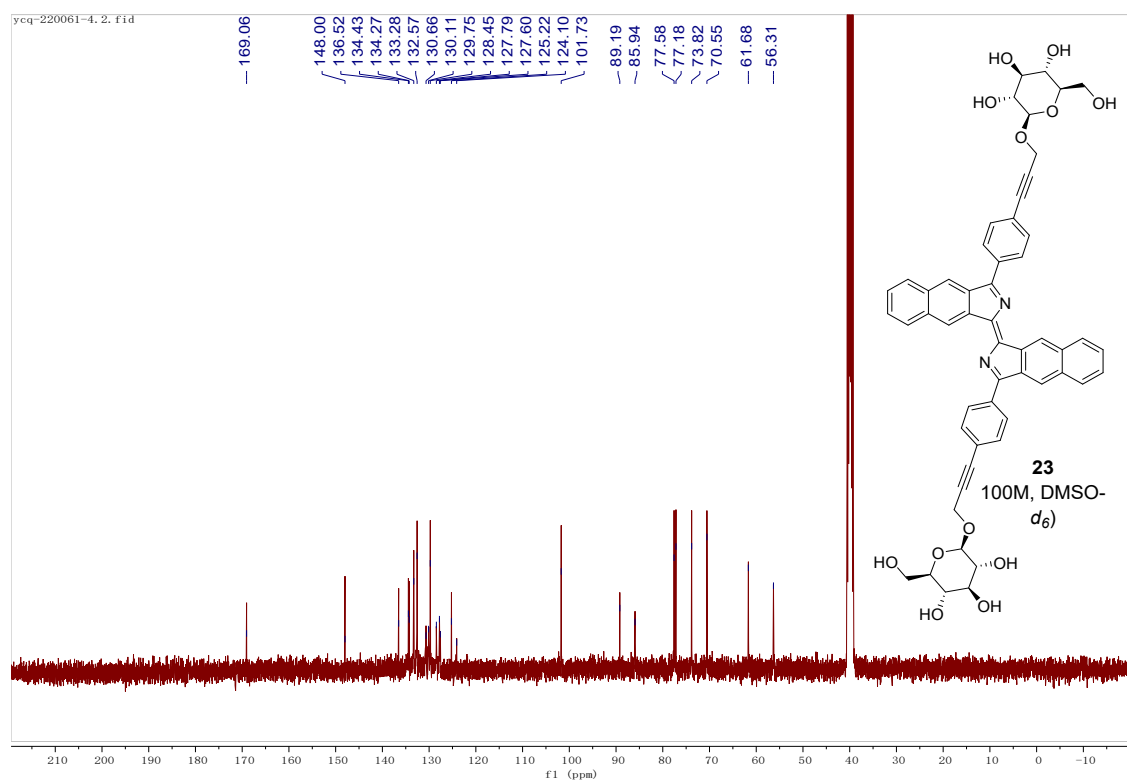

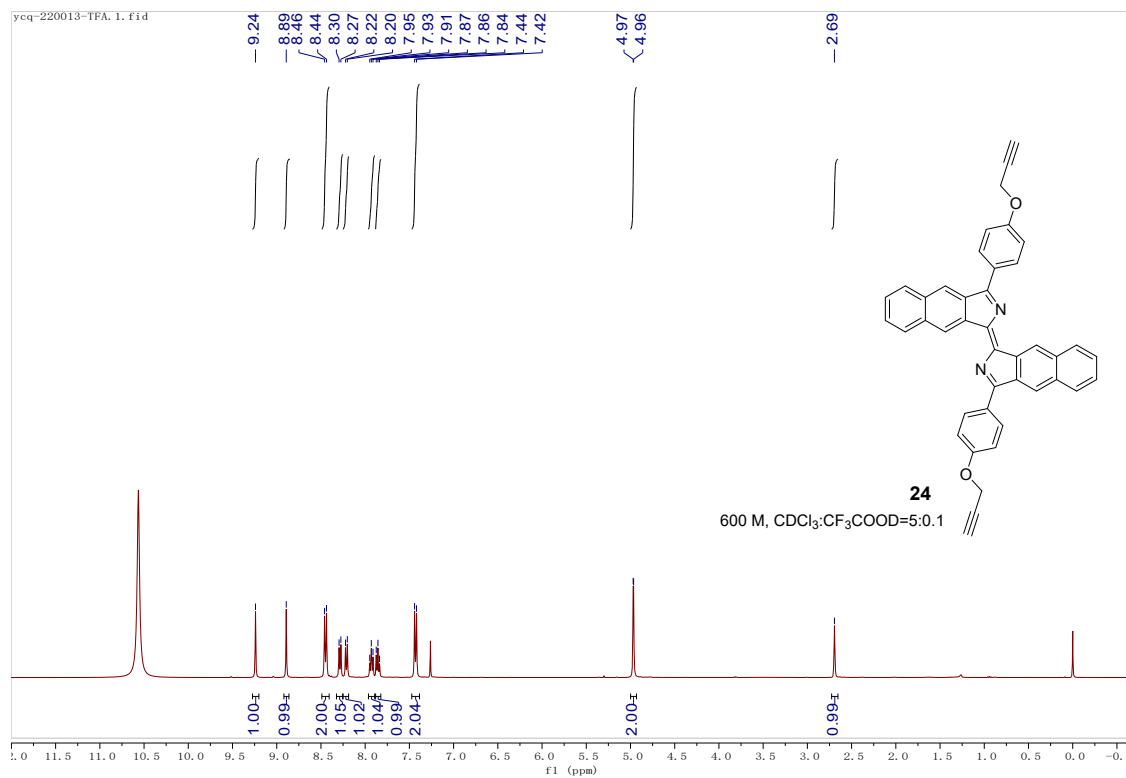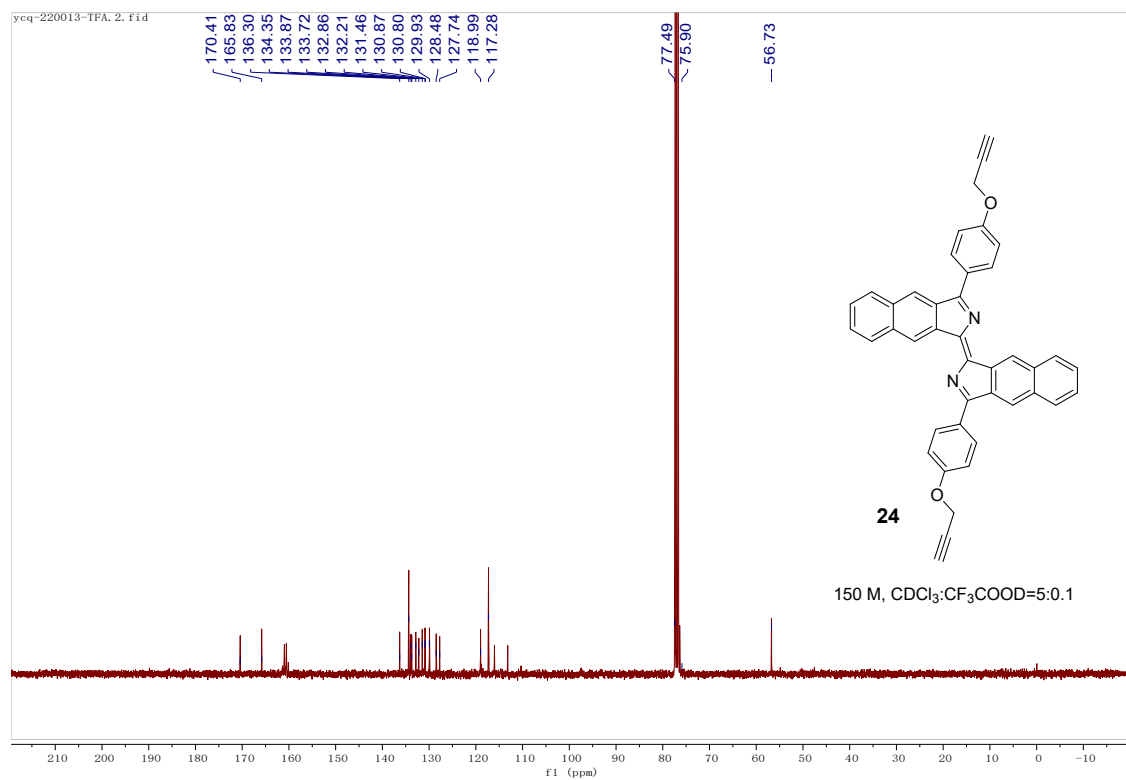

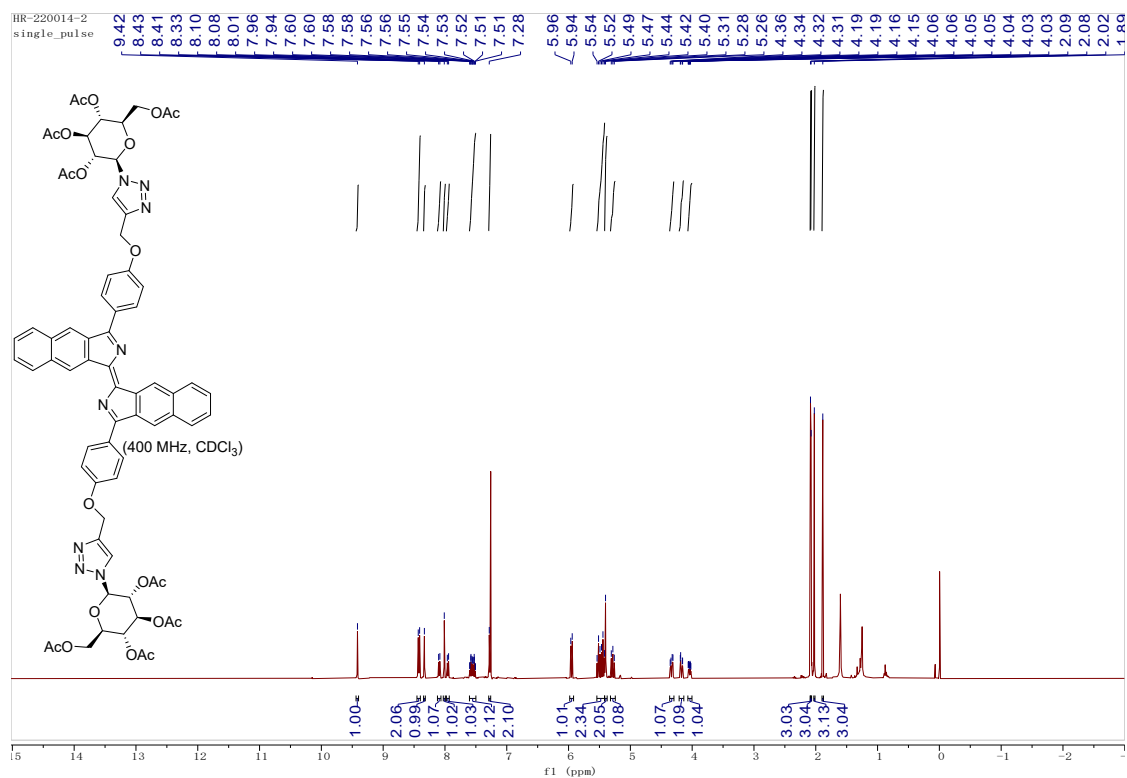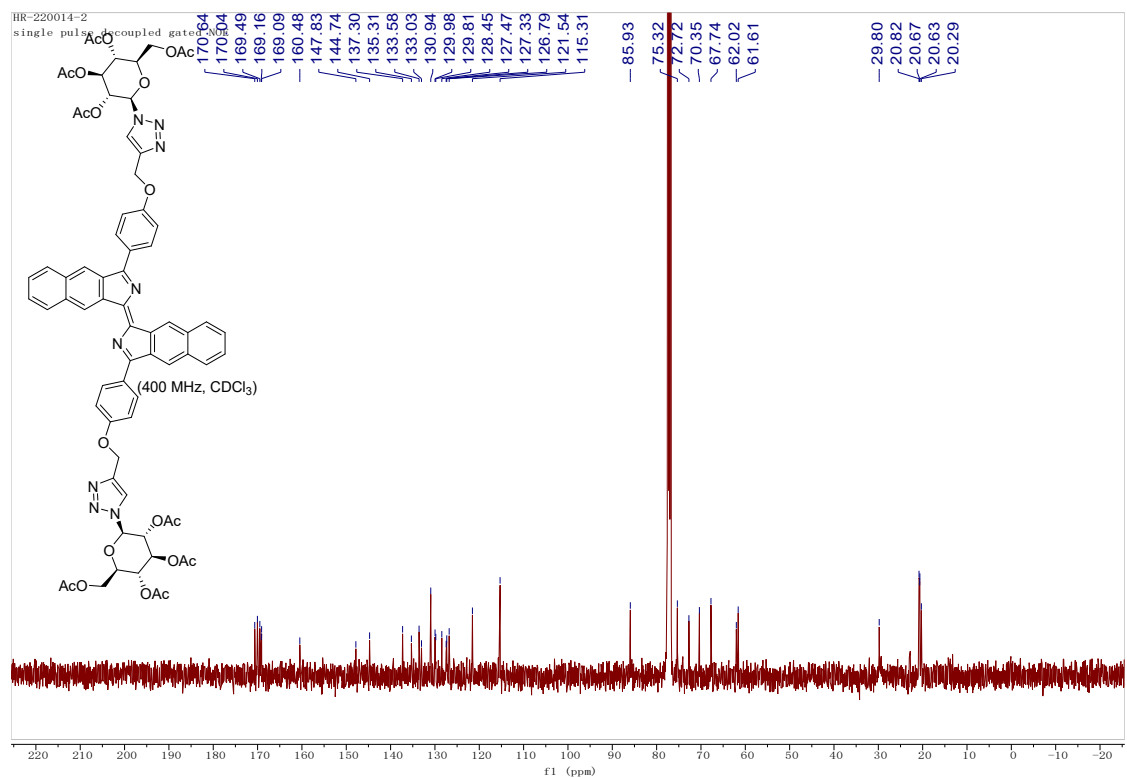



hr-220039. 2. fid

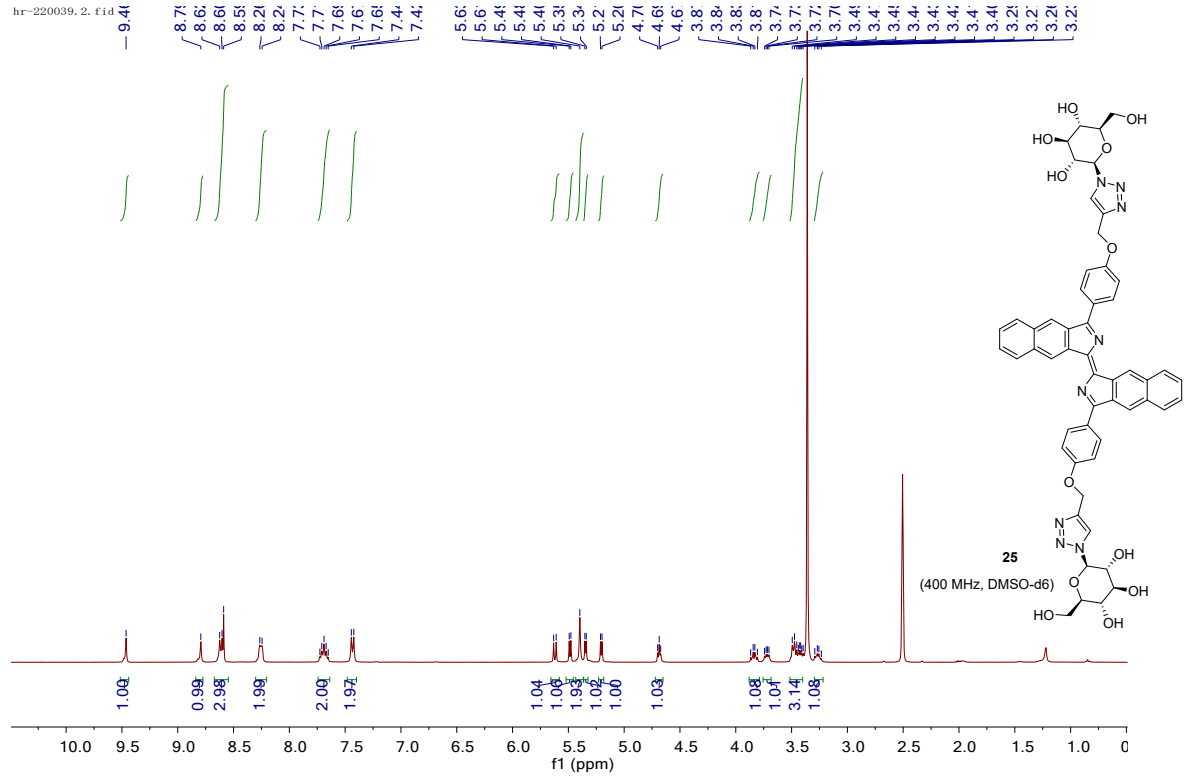

HR-220039  
single pulse decoupled gated NOE

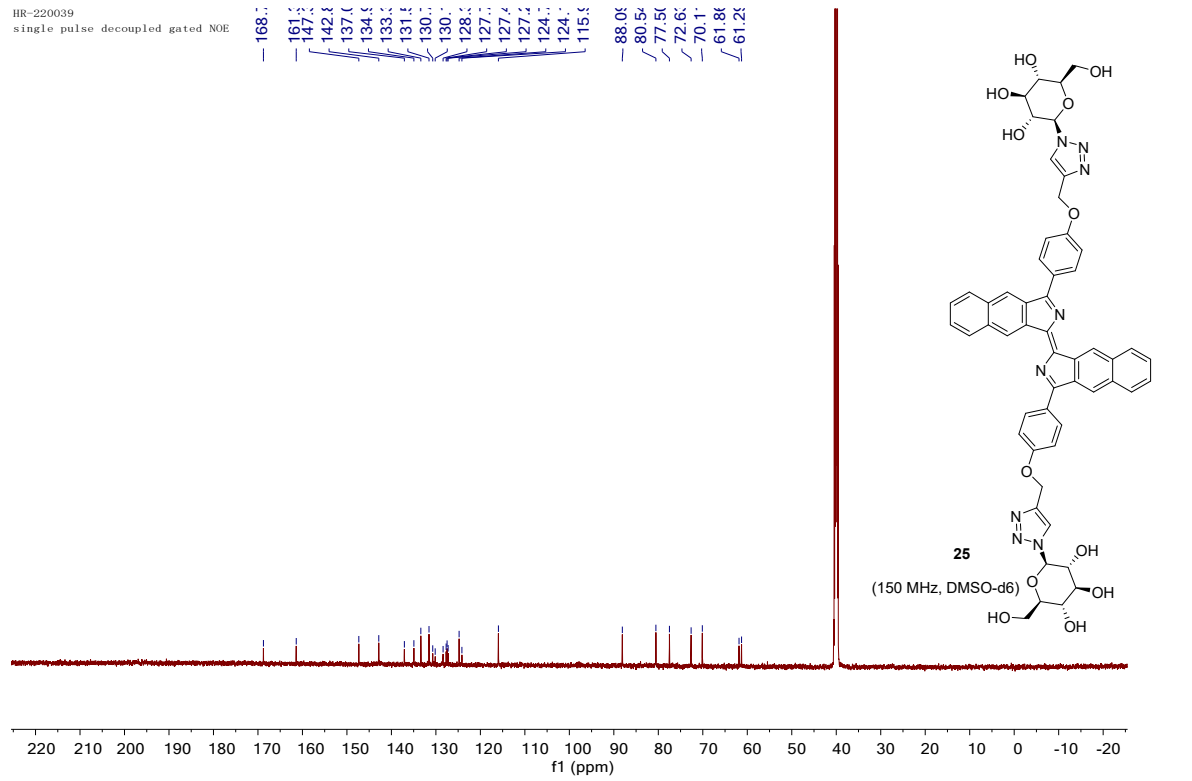

hr-220018-n\_3.fid

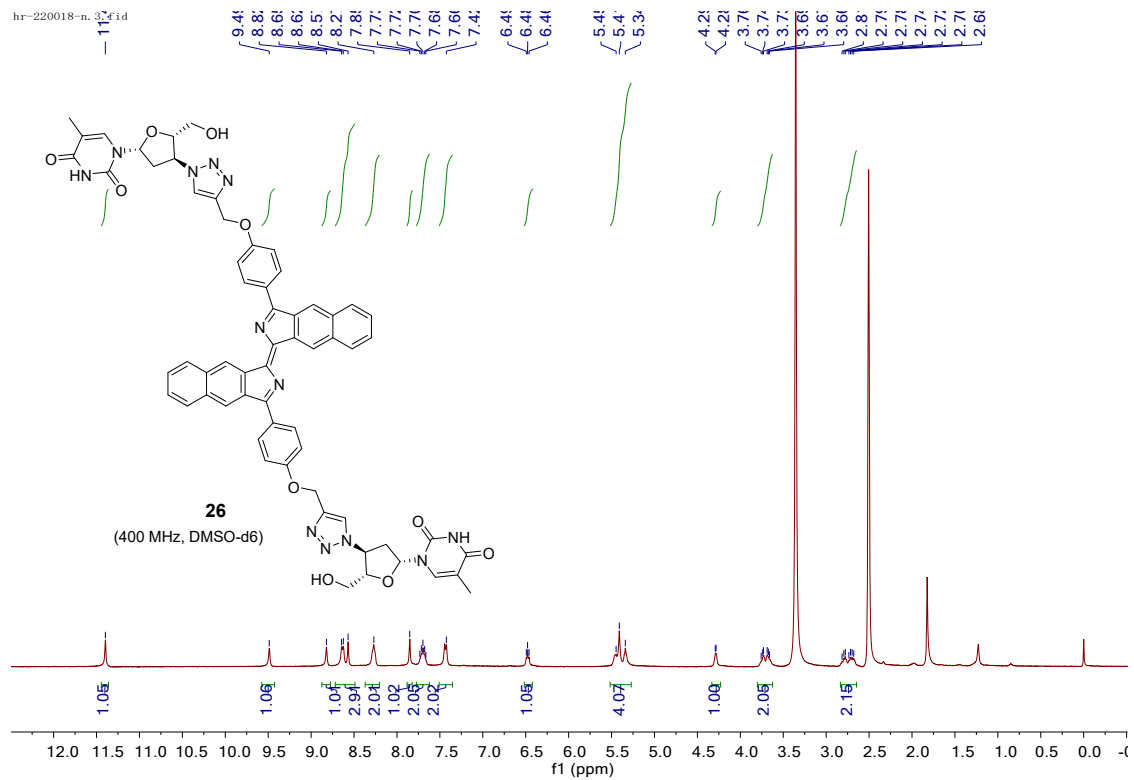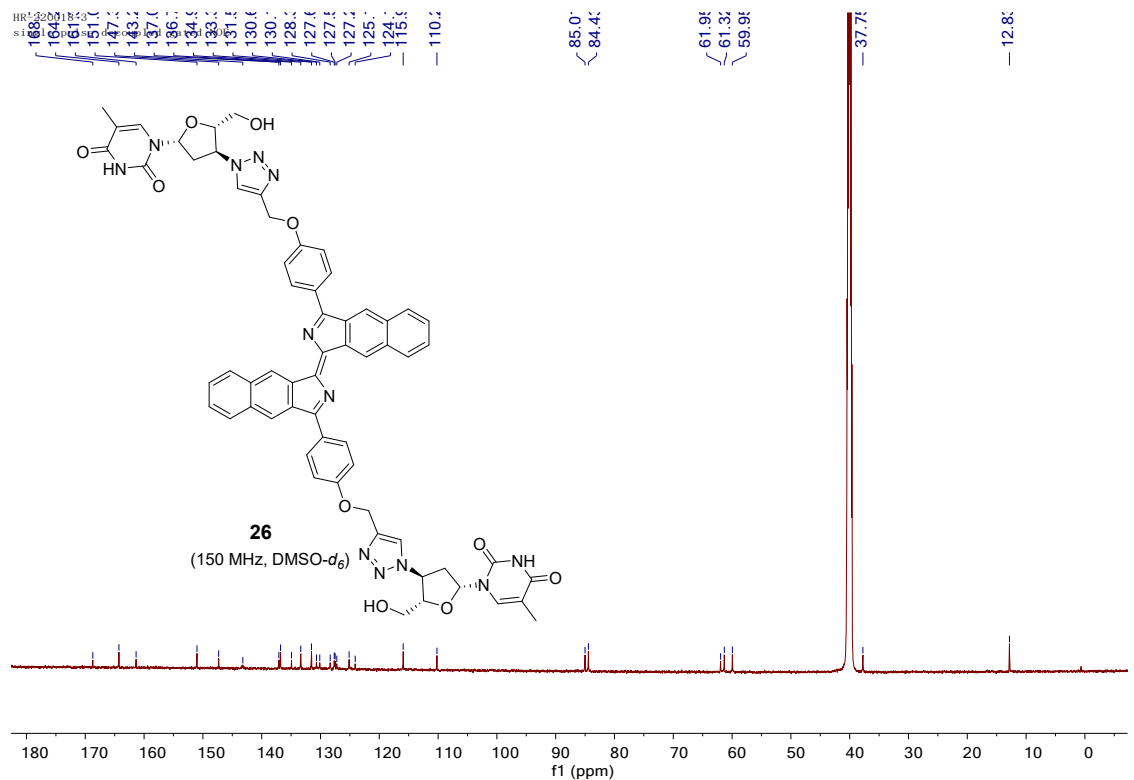



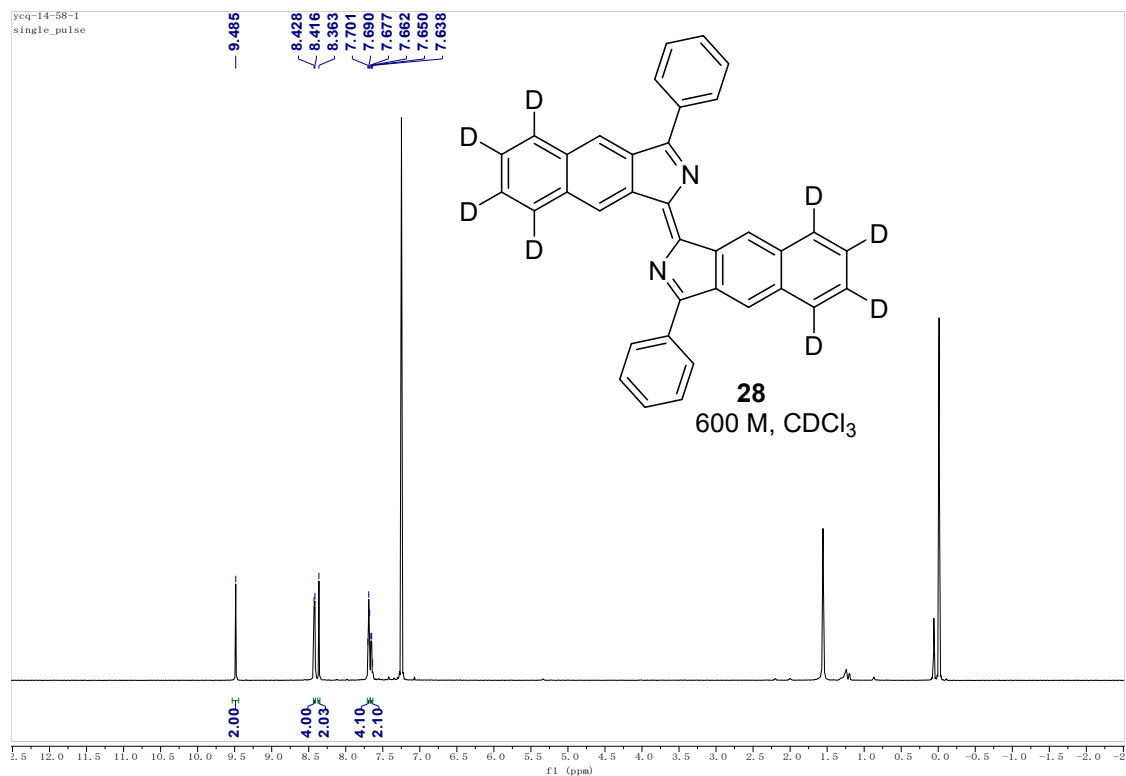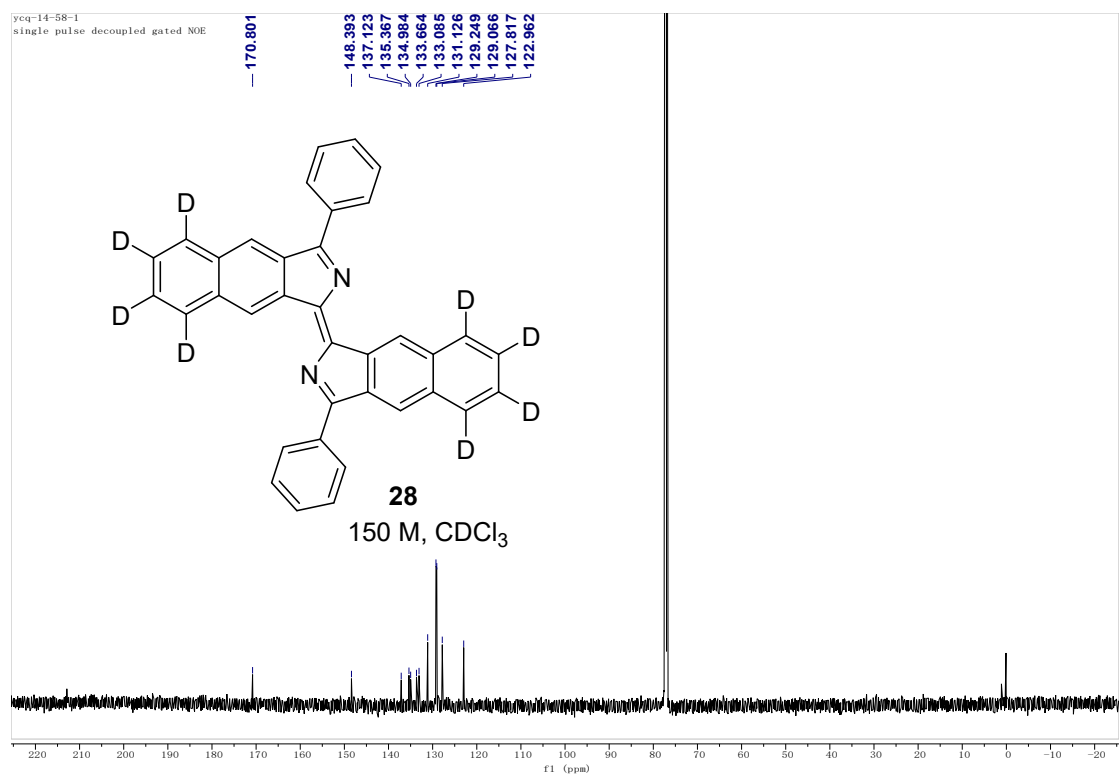

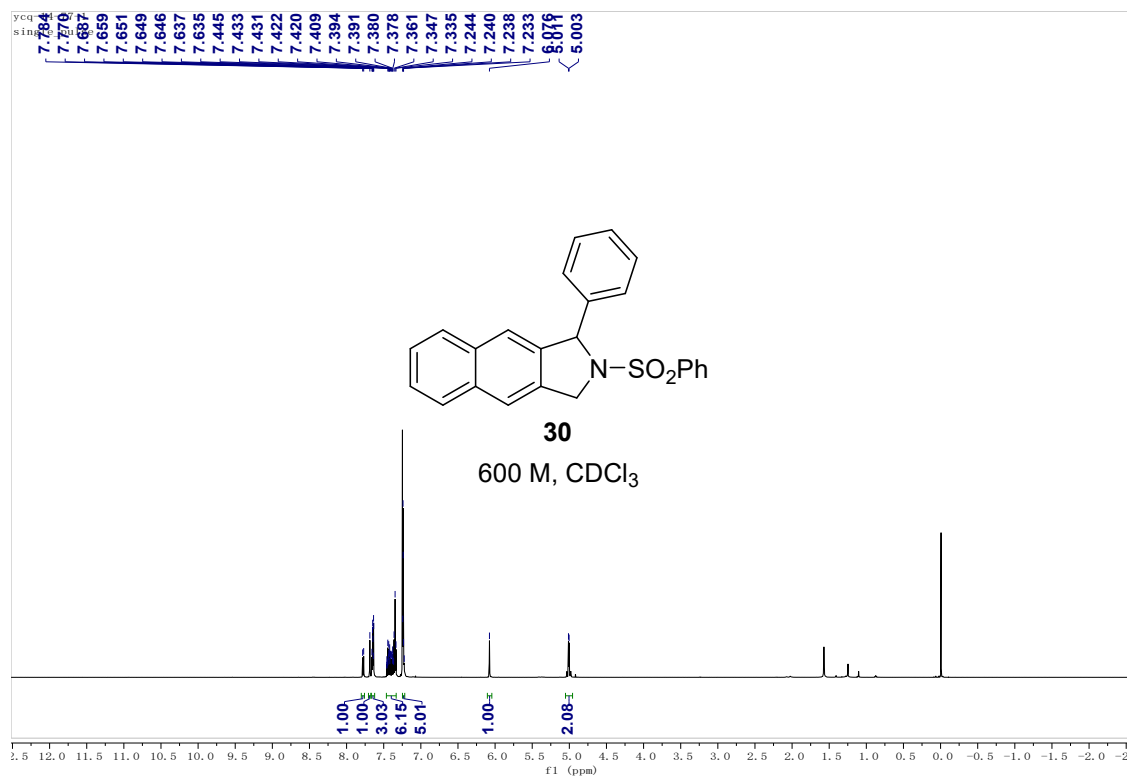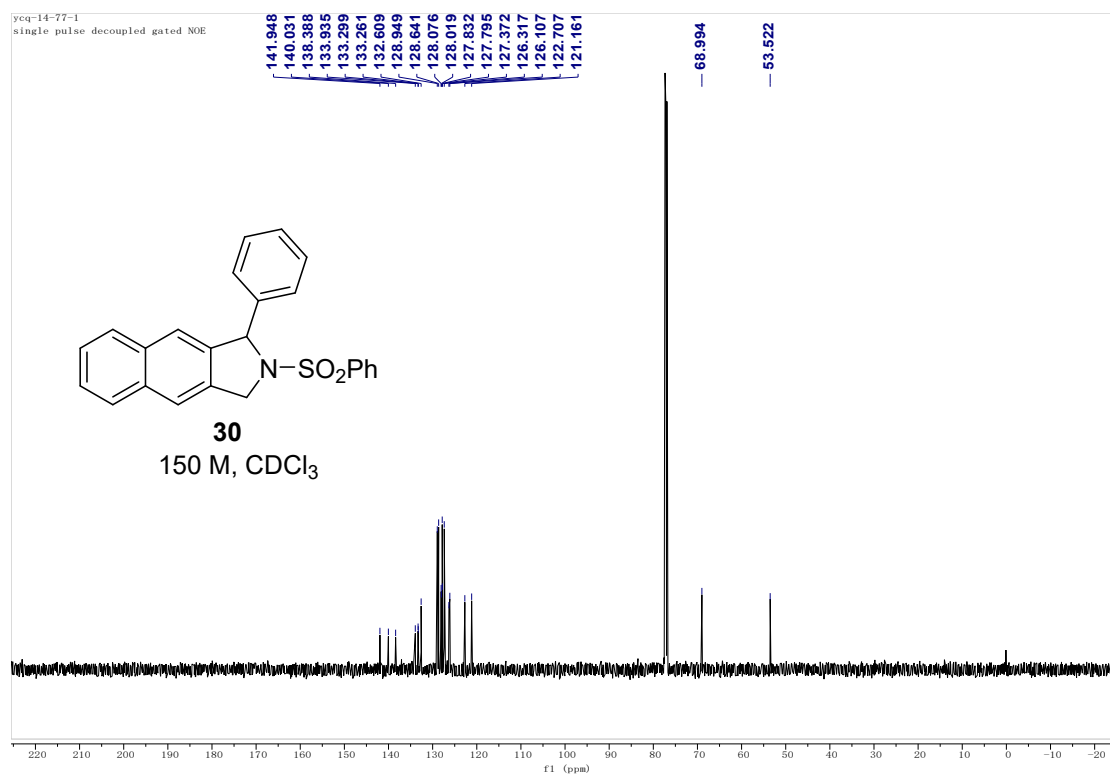



## Reference

1. (a) A. D. Becke, *J. Chem. Phys.*, 1993, **98**, 5648; (b) C. Lee, W. Yang and R. G. Parr, *Phys. Rev. B*, 1988, **37**, 785.
2. (a) S. Grimme, J. Antony, S. Ehrlich and H. Krieg, *J. Chem. Phys.*, 2010, **132**, 154104; (b) S. Grimme, S. Ehrlich and L. Goerigk, *J. Comput. Chem.*, 2011, **32**, 1456.
3. A. V. Marenich, C. J. Cramer and D. G. Truhlar, *J. Phys. Chem. B*, 2009, **113**, 6378.
4. (a) F. Weigend and R. Ahlrichs, *Phys. Chem. Chem. Phys.*, 2005, **7**, 3297; (b) F. Weigend, *Phys. Chem. Chem. Phys.*, 2006, **8**, 1057.
5. E. Besalú and J. M. Bofill, *Theor. Chem. Acc.*, 1998, **100**, 265.
6. K. Fukui, *Acc. Chem. Res.*, 1981, **14**, 363.
7. M. J. Frisch, G. W. Trucks, H. B. Schlegel, G. E. Scuseria, M. A. Robb, J. R. Cheeseman, G. Scalmani, V. Barone, B. Mennucci, G. A. Petersson, H. Nakatsuji, M. Caricato, X. Li, H. P. Hratchian, A. F. Izmaylov, J. Bloino, G. Zheng, J. L. Sonnenberg, M. Hada, M. Ehara, K. Toyota, R. Fukuda, J. Hasegawa, M. Ishida, T. Nakajima, Y. Honda, O. Kitao, H. Nakai, T. Vreven, J. A. Montgomery Jr., J. E. Peralta, F. Ogliaro, M. J. Bearpark, J. Heyd, E. N. Brothers, K. N. Kudin, V. N. Staroverov, R. Kobayashi, J. Normand, K. Raghavachari, A. P. Rendell, J. C. Burant, S. S. Iyengar, J. Tomasi, M. Cossi, N. Rega, N. J. Millam, M. Klene, J. E. Knox, J. B. Cross, V. Bakken, C. Adamo, J. Jaramillo, R. Gomperts, R. E. Stratmann, O. Yazyev, A. J. Austin, R. Cammi, C. Pomelli, J. W. Ochterski, R. L. Martin, K. Morokuma, V. G. Zakrzewski, G. A. Voth, P. Salvador, J. J. Dannenberg, S. Dapprich, A. D. Daniels, Ö. Farkas, J. B. Foresman, J. V. Ortiz, J. Cioslowski and D. J. Fox, *Journal*, 2013.
